# Supplementary material for: Biases in genome reconstruction from metagenomic data
Source: PeerJ journal article supplement (doi:10.7717/peerj.10119), 2020-10-30

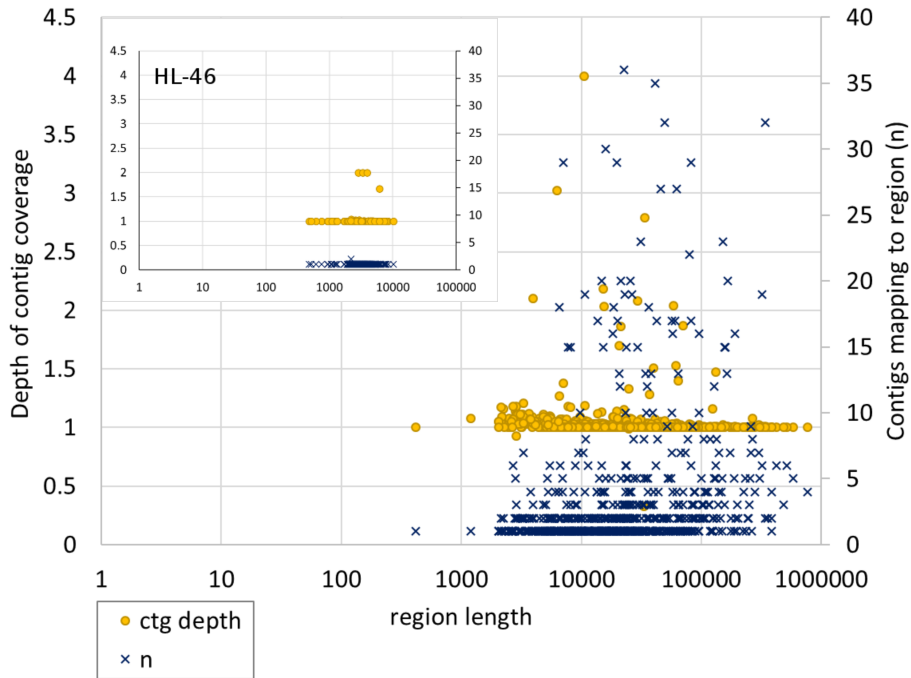

Supplement: Figure_S1.pdf [file Figure_S1.pdf]
