# Supplementary material for: Biases in genome reconstruction from metagenomic data
Source: PubMed Central journal article supplement (PMC7605220; doi:10.7717/peerj.10119), 2020-10-30

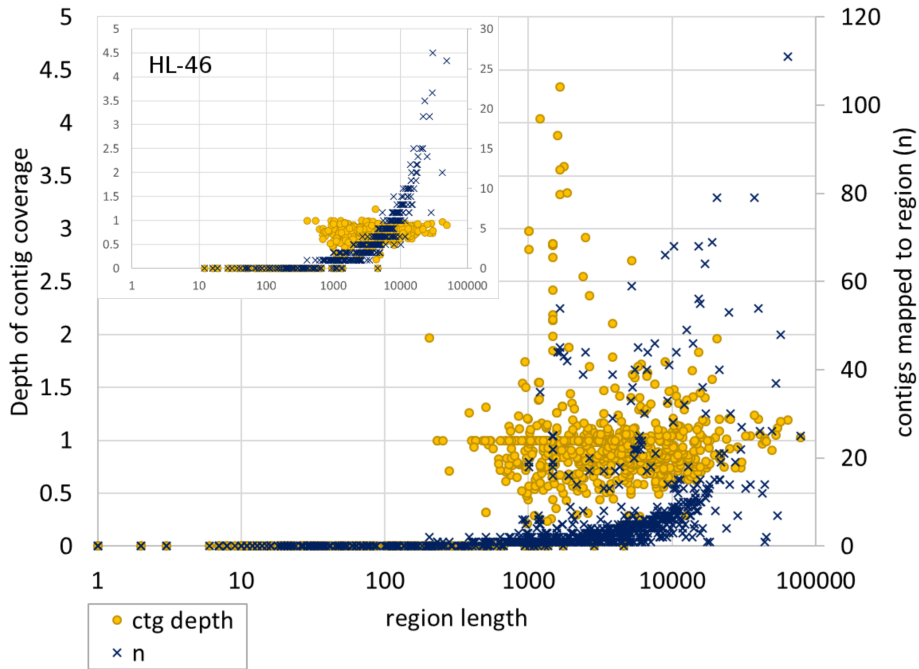

Supplement: peerj-08-10119-s002.pdf [file peerj-08-10119-s002.pdf]
