# Supplementary material for: Biases in genome reconstruction from metagenomic data
Source: PeerJ. 2020 Oct 30;8:e10119. doi: 10.7717/peerj.10119 (PMC7605220; doi:10.7717/peerj.10119)
Supplement: Supplemental Information 5 [file peerj-08-10119-s005.xlsx]

## Sheet: Sheet1
MAG ID	Manuscript Source	Storage Database	Data Location	WGS Accession	GenBank Assembly ID	NCBI BioSample
TARA_ANE_MAG_00001	Delmont et al. (2018) Nature Microbiology	figshare	10.6084/m9.figshare.4902923	na	na	na
TARA_ANE_MAG_00002	Delmont et al. (2018) Nature Microbiology	figshare	10.6084/m9.figshare.4902924	na	na	na
TARA_ANE_MAG_00003	Delmont et al. (2018) Nature Microbiology	figshare	10.6084/m9.figshare.4902925	na	na	na
TARA_ANE_MAG_00004	Delmont et al. (2018) Nature Microbiology	figshare	10.6084/m9.figshare.4902926	na	na	na
TARA_ANE_MAG_00005	Delmont et al. (2018) Nature Microbiology	figshare	10.6084/m9.figshare.4902927	na	na	na
TARA_ANE_MAG_00006	Delmont et al. (2018) Nature Microbiology	figshare	10.6084/m9.figshare.4902928	na	na	na
TARA_ANE_MAG_00007	Delmont et al. (2018) Nature Microbiology	figshare	10.6084/m9.figshare.4902929	na	na	na
TARA_ANE_MAG_00008	Delmont et al. (2018) Nature Microbiology	figshare	10.6084/m9.figshare.4902930	na	na	na
TARA_ANE_MAG_00009	Delmont et al. (2018) Nature Microbiology	figshare	10.6084/m9.figshare.4902931	na	na	na
TARA_ANE_MAG_00010	Delmont et al. (2018) Nature Microbiology	figshare	10.6084/m9.figshare.4902932	na	na	na
TARA_ANE_MAG_00011	Delmont et al. (2018) Nature Microbiology	figshare	10.6084/m9.figshare.4902933	na	na	na
TARA_ANE_MAG_00012	Delmont et al. (2018) Nature Microbiology	figshare	10.6084/m9.figshare.4902934	na	na	na
TARA_ANE_MAG_00013	Delmont et al. (2018) Nature Microbiology	figshare	10.6084/m9.figshare.4902935	na	na	na
TARA_ANE_MAG_00014	Delmont et al. (2018) Nature Microbiology	figshare	10.6084/m9.figshare.4902936	na	na	na
TARA_ANE_MAG_00015	Delmont et al. (2018) Nature Microbiology	figshare	10.6084/m9.figshare.4902937	na	na	na
TARA_ANE_MAG_00016	Delmont et al. (2018) Nature Microbiology	figshare	10.6084/m9.figshare.4902938	na	na	na
TARA_ANE_MAG_00017	Delmont et al. (2018) Nature Microbiology	figshare	10.6084/m9.figshare.4902939	na	na	na
TARA_ANE_MAG_00018	Delmont et al. (2018) Nature Microbiology	figshare	10.6084/m9.figshare.4902940	na	na	na
TARA_ANE_MAG_00019	Delmont et al. (2018) Nature Microbiology	figshare	10.6084/m9.figshare.4902941	na	na	na
TARA_ANE_MAG_00020	Delmont et al. (2018) Nature Microbiology	figshare	10.6084/m9.figshare.4902942	na	na	na
TARA_ANE_MAG_00022	Delmont et al. (2018) Nature Microbiology	figshare	10.6084/m9.figshare.4902943	na	na	na
TARA_ANE_MAG_00023	Delmont et al. (2018) Nature Microbiology	figshare	10.6084/m9.figshare.4902944	na	na	na
TARA_ANE_MAG_00024	Delmont et al. (2018) Nature Microbiology	figshare	10.6084/m9.figshare.4902945	na	na	na
TARA_ANE_MAG_00025	Delmont et al. (2018) Nature Microbiology	figshare	10.6084/m9.figshare.4902946	na	na	na
TARA_ANE_MAG_00026	Delmont et al. (2018) Nature Microbiology	figshare	10.6084/m9.figshare.4902947	na	na	na
TARA_ANE_MAG_00027	Delmont et al. (2018) Nature Microbiology	figshare	10.6084/m9.figshare.4902948	na	na	na
TARA_ANE_MAG_00028	Delmont et al. (2018) Nature Microbiology	figshare	10.6084/m9.figshare.4902949	na	na	na
TARA_ANE_MAG_00029	Delmont et al. (2018) Nature Microbiology	figshare	10.6084/m9.figshare.4902950	na	na	na
TARA_ANE_MAG_00030	Delmont et al. (2018) Nature Microbiology	figshare	10.6084/m9.figshare.4902951	na	na	na
TARA_ANE_MAG_00031	Delmont et al. (2018) Nature Microbiology	figshare	10.6084/m9.figshare.4902952	na	na	na
TARA_ANE_MAG_00032	Delmont et al. (2018) Nature Microbiology	figshare	10.6084/m9.figshare.4902953	na	na	na
TARA_ANE_MAG_00033	Delmont et al. (2018) Nature Microbiology	figshare	10.6084/m9.figshare.4902954	na	na	na
TARA_ANE_MAG_00034	Delmont et al. (2018) Nature Microbiology	figshare	10.6084/m9.figshare.4902955	na	na	na
TARA_ANE_MAG_00035	Delmont et al. (2018) Nature Microbiology	figshare	10.6084/m9.figshare.4902956	na	na	na
TARA_ANE_MAG_00036	Delmont et al. (2018) Nature Microbiology	figshare	10.6084/m9.figshare.4902957	na	na	na
TARA_ANE_MAG_00037	Delmont et al. (2018) Nature Microbiology	figshare	10.6084/m9.figshare.4902958	na	na	na
TARA_ANE_MAG_00038	Delmont et al. (2018) Nature Microbiology	figshare	10.6084/m9.figshare.4902959	na	na	na
TARA_ANE_MAG_00039	Delmont et al. (2018) Nature Microbiology	figshare	10.6084/m9.figshare.4902960	na	na	na
TARA_ANE_MAG_00040	Delmont et al. (2018) Nature Microbiology	figshare	10.6084/m9.figshare.4902961	na	na	na
TARA_ANE_MAG_00041	Delmont et al. (2018) Nature Microbiology	figshare	10.6084/m9.figshare.4902962	na	na	na
TARA_ANE_MAG_00042	Delmont et al. (2018) Nature Microbiology	figshare	10.6084/m9.figshare.4902963	na	na	na
TARA_ANE_MAG_00043	Delmont et al. (2018) Nature Microbiology	figshare	10.6084/m9.figshare.4902964	na	na	na
TARA_ANE_MAG_00044	Delmont et al. (2018) Nature Microbiology	figshare	10.6084/m9.figshare.4902965	na	na	na
TARA_ANE_MAG_00046	Delmont et al. (2018) Nature Microbiology	figshare	10.6084/m9.figshare.4902966	na	na	na
TARA_ANE_MAG_00048	Delmont et al. (2018) Nature Microbiology	figshare	10.6084/m9.figshare.4902967	na	na	na
TARA_ANE_MAG_00049	Delmont et al. (2018) Nature Microbiology	figshare	10.6084/m9.figshare.4902968	na	na	na
TARA_ANE_MAG_00050	Delmont et al. (2018) Nature Microbiology	figshare	10.6084/m9.figshare.4902969	na	na	na
TARA_ANE_MAG_00051	Delmont et al. (2018) Nature Microbiology	figshare	10.6084/m9.figshare.4902970	na	na	na
TARA_ANE_MAG_00052	Delmont et al. (2018) Nature Microbiology	figshare	10.6084/m9.figshare.4902971	na	na	na
TARA_ANE_MAG_00053	Delmont et al. (2018) Nature Microbiology	figshare	10.6084/m9.figshare.4902972	na	na	na
TARA_ANE_MAG_00054	Delmont et al. (2018) Nature Microbiology	figshare	10.6084/m9.figshare.4902973	na	na	na
TARA_ANE_MAG_00055	Delmont et al. (2018) Nature Microbiology	figshare	10.6084/m9.figshare.4902974	na	na	na
TARA_ANE_MAG_00056	Delmont et al. (2018) Nature Microbiology	figshare	10.6084/m9.figshare.4902975	na	na	na
TARA_ANE_MAG_00057	Delmont et al. (2018) Nature Microbiology	figshare	10.6084/m9.figshare.4902976	na	na	na
TARA_ANE_MAG_00058	Delmont et al. (2018) Nature Microbiology	figshare	10.6084/m9.figshare.4902977	na	na	na
TARA_ANE_MAG_00059	Delmont et al. (2018) Nature Microbiology	figshare	10.6084/m9.figshare.4902978	na	na	na
TARA_ANE_MAG_00060	Delmont et al. (2018) Nature Microbiology	figshare	10.6084/m9.figshare.4902979	na	na	na
TARA_ANE_MAG_00061	Delmont et al. (2018) Nature Microbiology	figshare	10.6084/m9.figshare.4902980	na	na	na
TARA_ANE_MAG_00062	Delmont et al. (2018) Nature Microbiology	figshare	10.6084/m9.figshare.4902981	na	na	na
TARA_ANE_MAG_00063	Delmont et al. (2018) Nature Microbiology	figshare	10.6084/m9.figshare.4902982	na	na	na
TARA_ANE_MAG_00064	Delmont et al. (2018) Nature Microbiology	figshare	10.6084/m9.figshare.4902983	na	na	na
TARA_ANE_MAG_00065	Delmont et al. (2018) Nature Microbiology	figshare	10.6084/m9.figshare.4902984	na	na	na
TARA_ANE_MAG_00066	Delmont et al. (2018) Nature Microbiology	figshare	10.6084/m9.figshare.4902985	na	na	na
TARA_ANE_MAG_00068	Delmont et al. (2018) Nature Microbiology	figshare	10.6084/m9.figshare.4902986	na	na	na
TARA_ANE_MAG_00069	Delmont et al. (2018) Nature Microbiology	figshare	10.6084/m9.figshare.4902987	na	na	na
TARA_ANE_MAG_00070	Delmont et al. (2018) Nature Microbiology	figshare	10.6084/m9.figshare.4902988	na	na	na
TARA_ANE_MAG_00071	Delmont et al. (2018) Nature Microbiology	figshare	10.6084/m9.figshare.4902989	na	na	na
TARA_ANE_MAG_00073	Delmont et al. (2018) Nature Microbiology	figshare	10.6084/m9.figshare.4902990	na	na	na
TARA_ANE_MAG_00074	Delmont et al. (2018) Nature Microbiology	figshare	10.6084/m9.figshare.4902991	na	na	na
TARA_ANE_MAG_00076	Delmont et al. (2018) Nature Microbiology	figshare	10.6084/m9.figshare.4902992	na	na	na
TARA_ANE_MAG_00077	Delmont et al. (2018) Nature Microbiology	figshare	10.6084/m9.figshare.4902993	na	na	na
TARA_ANE_MAG_00078	Delmont et al. (2018) Nature Microbiology	figshare	10.6084/m9.figshare.4902994	na	na	na
TARA_ANE_MAG_00079	Delmont et al. (2018) Nature Microbiology	figshare	10.6084/m9.figshare.4902995	na	na	na
TARA_ANE_MAG_00080	Delmont et al. (2018) Nature Microbiology	figshare	10.6084/m9.figshare.4902996	na	na	na
TARA_ANE_MAG_00081	Delmont et al. (2018) Nature Microbiology	figshare	10.6084/m9.figshare.4902997	na	na	na
TARA_ANE_MAG_00082	Delmont et al. (2018) Nature Microbiology	figshare	10.6084/m9.figshare.4902998	na	na	na
TARA_ANE_MAG_00083	Delmont et al. (2018) Nature Microbiology	figshare	10.6084/m9.figshare.4902999	na	na	na
TARA_ANE_MAG_00086	Delmont et al. (2018) Nature Microbiology	figshare	10.6084/m9.figshare.4903000	na	na	na
TARA_ANE_MAG_00087	Delmont et al. (2018) Nature Microbiology	figshare	10.6084/m9.figshare.4903001	na	na	na
TARA_ANE_MAG_00088	Delmont et al. (2018) Nature Microbiology	figshare	10.6084/m9.figshare.4903002	na	na	na
TARA_ANE_MAG_00090	Delmont et al. (2018) Nature Microbiology	figshare	10.6084/m9.figshare.4903003	na	na	na
TARA_ANE_MAG_00091	Delmont et al. (2018) Nature Microbiology	figshare	10.6084/m9.figshare.4903004	na	na	na
TARA_ANE_MAG_00092	Delmont et al. (2018) Nature Microbiology	figshare	10.6084/m9.figshare.4903005	na	na	na
TARA_ANE_MAG_00093	Delmont et al. (2018) Nature Microbiology	figshare	10.6084/m9.figshare.4903006	na	na	na
TARA_ANE_MAG_00094	Delmont et al. (2018) Nature Microbiology	figshare	10.6084/m9.figshare.4903007	na	na	na
TARA_ANE_MAG_00096	Delmont et al. (2018) Nature Microbiology	figshare	10.6084/m9.figshare.4903008	na	na	na
TARA_ANE_MAG_00097	Delmont et al. (2018) Nature Microbiology	figshare	10.6084/m9.figshare.4903009	na	na	na
TARA_ANE_MAG_00098	Delmont et al. (2018) Nature Microbiology	figshare	10.6084/m9.figshare.4903010	na	na	na
TARA_ANE_MAG_00099	Delmont et al. (2018) Nature Microbiology	figshare	10.6084/m9.figshare.4903011	na	na	na
TARA_ANE_MAG_00101	Delmont et al. (2018) Nature Microbiology	figshare	10.6084/m9.figshare.4903012	na	na	na
TARA_ANW_MAG_00001	Delmont et al. (2018) Nature Microbiology	figshare	10.6084/m9.figshare.4903013	na	na	na
TARA_ANW_MAG_00002	Delmont et al. (2018) Nature Microbiology	figshare	10.6084/m9.figshare.4903014	na	na	na
TARA_ANW_MAG_00003	Delmont et al. (2018) Nature Microbiology	figshare	10.6084/m9.figshare.4903015	na	na	na
TARA_ANW_MAG_00004	Delmont et al. (2018) Nature Microbiology	figshare	10.6084/m9.figshare.4903016	na	na	na
TARA_ANW_MAG_00005	Delmont et al. (2018) Nature Microbiology	figshare	10.6084/m9.figshare.4903017	na	na	na
TARA_ANW_MAG_00006	Delmont et al. (2018) Nature Microbiology	figshare	10.6084/m9.figshare.4903018	na	na	na
TARA_ANW_MAG_00007	Delmont et al. (2018) Nature Microbiology	figshare	10.6084/m9.figshare.4903019	na	na	na
TARA_ANW_MAG_00009	Delmont et al. (2018) Nature Microbiology	figshare	10.6084/m9.figshare.4903020	na	na	na
TARA_ANW_MAG_00010	Delmont et al. (2018) Nature Microbiology	figshare	10.6084/m9.figshare.4903021	na	na	na
TARA_ANW_MAG_00011	Delmont et al. (2018) Nature Microbiology	figshare	10.6084/m9.figshare.4903022	na	na	na
TARA_ANW_MAG_00012	Delmont et al. (2018) Nature Microbiology	figshare	10.6084/m9.figshare.4903023	na	na	na
TARA_ANW_MAG_00013	Delmont et al. (2018) Nature Microbiology	figshare	10.6084/m9.figshare.4903024	na	na	na
TARA_ANW_MAG_00014	Delmont et al. (2018) Nature Microbiology	figshare	10.6084/m9.figshare.4903025	na	na	na
TARA_ANW_MAG_00015	Delmont et al. (2018) Nature Microbiology	figshare	10.6084/m9.figshare.4903026	na	na	na
TARA_ANW_MAG_00016	Delmont et al. (2018) Nature Microbiology	figshare	10.6084/m9.figshare.4903027	na	na	na
TARA_ANW_MAG_00017	Delmont et al. (2018) Nature Microbiology	figshare	10.6084/m9.figshare.4903028	na	na	na
TARA_ANW_MAG_00018	Delmont et al. (2018) Nature Microbiology	figshare	10.6084/m9.figshare.4903029	na	na	na
TARA_ANW_MAG_00019	Delmont et al. (2018) Nature Microbiology	figshare	10.6084/m9.figshare.4903030	na	na	na
TARA_ANW_MAG_00020	Delmont et al. (2018) Nature Microbiology	figshare	10.6084/m9.figshare.4903031	na	na	na
TARA_ANW_MAG_00021	Delmont et al. (2018) Nature Microbiology	figshare	10.6084/m9.figshare.4903032	na	na	na
TARA_ANW_MAG_00022	Delmont et al. (2018) Nature Microbiology	figshare	10.6084/m9.figshare.4903033	na	na	na
TARA_ANW_MAG_00023	Delmont et al. (2018) Nature Microbiology	figshare	10.6084/m9.figshare.4903034	na	na	na
TARA_ANW_MAG_00024	Delmont et al. (2018) Nature Microbiology	figshare	10.6084/m9.figshare.4903035	na	na	na
TARA_ANW_MAG_00025	Delmont et al. (2018) Nature Microbiology	figshare	10.6084/m9.figshare.4903036	na	na	na
TARA_ANW_MAG_00026	Delmont et al. (2018) Nature Microbiology	figshare	10.6084/m9.figshare.4903037	na	na	na
TARA_ANW_MAG_00027	Delmont et al. (2018) Nature Microbiology	figshare	10.6084/m9.figshare.4903038	na	na	na
TARA_ANW_MAG_00028	Delmont et al. (2018) Nature Microbiology	figshare	10.6084/m9.figshare.4903039	na	na	na
TARA_ANW_MAG_00029	Delmont et al. (2018) Nature Microbiology	figshare	10.6084/m9.figshare.4903040	na	na	na
TARA_ANW_MAG_00030	Delmont et al. (2018) Nature Microbiology	figshare	10.6084/m9.figshare.4903041	na	na	na
TARA_ANW_MAG_00031	Delmont et al. (2018) Nature Microbiology	figshare	10.6084/m9.figshare.4903042	na	na	na
TARA_ANW_MAG_00032	Delmont et al. (2018) Nature Microbiology	figshare	10.6084/m9.figshare.4903043	na	na	na
TARA_ANW_MAG_00033	Delmont et al. (2018) Nature Microbiology	figshare	10.6084/m9.figshare.4903044	na	na	na
TARA_ANW_MAG_00034	Delmont et al. (2018) Nature Microbiology	figshare	10.6084/m9.figshare.4903045	na	na	na
TARA_ANW_MAG_00035	Delmont et al. (2018) Nature Microbiology	figshare	10.6084/m9.figshare.4903046	na	na	na
TARA_ANW_MAG_00036	Delmont et al. (2018) Nature Microbiology	figshare	10.6084/m9.figshare.4903047	na	na	na
TARA_ANW_MAG_00038	Delmont et al. (2018) Nature Microbiology	figshare	10.6084/m9.figshare.4903048	na	na	na
TARA_ANW_MAG_00039	Delmont et al. (2018) Nature Microbiology	figshare	10.6084/m9.figshare.4903049	na	na	na
TARA_ANW_MAG_00040	Delmont et al. (2018) Nature Microbiology	figshare	10.6084/m9.figshare.4903050	na	na	na
TARA_ANW_MAG_00041	Delmont et al. (2018) Nature Microbiology	figshare	10.6084/m9.figshare.4903051	na	na	na
TARA_ANW_MAG_00042	Delmont et al. (2018) Nature Microbiology	figshare	10.6084/m9.figshare.4903052	na	na	na
TARA_ANW_MAG_00043	Delmont et al. (2018) Nature Microbiology	figshare	10.6084/m9.figshare.4903053	na	na	na
TARA_ANW_MAG_00044	Delmont et al. (2018) Nature Microbiology	figshare	10.6084/m9.figshare.4903054	na	na	na
TARA_ANW_MAG_00045	Delmont et al. (2018) Nature Microbiology	figshare	10.6084/m9.figshare.4903055	na	na	na
TARA_ANW_MAG_00046	Delmont et al. (2018) Nature Microbiology	figshare	10.6084/m9.figshare.4903056	na	na	na
TARA_ANW_MAG_00048	Delmont et al. (2018) Nature Microbiology	figshare	10.6084/m9.figshare.4903057	na	na	na
TARA_ANW_MAG_00049	Delmont et al. (2018) Nature Microbiology	figshare	10.6084/m9.figshare.4903058	na	na	na
TARA_ANW_MAG_00050	Delmont et al. (2018) Nature Microbiology	figshare	10.6084/m9.figshare.4903059	na	na	na
TARA_ANW_MAG_00051	Delmont et al. (2018) Nature Microbiology	figshare	10.6084/m9.figshare.4903060	na	na	na
TARA_ANW_MAG_00052	Delmont et al. (2018) Nature Microbiology	figshare	10.6084/m9.figshare.4903061	na	na	na
TARA_ANW_MAG_00053	Delmont et al. (2018) Nature Microbiology	figshare	10.6084/m9.figshare.4903062	na	na	na
TARA_ANW_MAG_00054	Delmont et al. (2018) Nature Microbiology	figshare	10.6084/m9.figshare.4903063	na	na	na
TARA_ANW_MAG_00055	Delmont et al. (2018) Nature Microbiology	figshare	10.6084/m9.figshare.4903064	na	na	na
TARA_ANW_MAG_00056	Delmont et al. (2018) Nature Microbiology	figshare	10.6084/m9.figshare.4903065	na	na	na
TARA_ANW_MAG_00057	Delmont et al. (2018) Nature Microbiology	figshare	10.6084/m9.figshare.4903066	na	na	na
TARA_ANW_MAG_00058	Delmont et al. (2018) Nature Microbiology	figshare	10.6084/m9.figshare.4903067	na	na	na
TARA_ANW_MAG_00059	Delmont et al. (2018) Nature Microbiology	figshare	10.6084/m9.figshare.4903068	na	na	na
TARA_ANW_MAG_00060	Delmont et al. (2018) Nature Microbiology	figshare	10.6084/m9.figshare.4903069	na	na	na
TARA_ANW_MAG_00061	Delmont et al. (2018) Nature Microbiology	figshare	10.6084/m9.figshare.4903070	na	na	na
TARA_ANW_MAG_00062	Delmont et al. (2018) Nature Microbiology	figshare	10.6084/m9.figshare.4903071	na	na	na
TARA_ANW_MAG_00064	Delmont et al. (2018) Nature Microbiology	figshare	10.6084/m9.figshare.4903072	na	na	na
TARA_ANW_MAG_00065	Delmont et al. (2018) Nature Microbiology	figshare	10.6084/m9.figshare.4903073	na	na	na
TARA_ANW_MAG_00067	Delmont et al. (2018) Nature Microbiology	figshare	10.6084/m9.figshare.4903074	na	na	na
TARA_ANW_MAG_00068	Delmont et al. (2018) Nature Microbiology	figshare	10.6084/m9.figshare.4903075	na	na	na
TARA_ANW_MAG_00069	Delmont et al. (2018) Nature Microbiology	figshare	10.6084/m9.figshare.4903076	na	na	na
TARA_ANW_MAG_00070	Delmont et al. (2018) Nature Microbiology	figshare	10.6084/m9.figshare.4903077	na	na	na
TARA_ANW_MAG_00072	Delmont et al. (2018) Nature Microbiology	figshare	10.6084/m9.figshare.4903078	na	na	na
TARA_ANW_MAG_00073	Delmont et al. (2018) Nature Microbiology	figshare	10.6084/m9.figshare.4903079	na	na	na
TARA_ANW_MAG_00074	Delmont et al. (2018) Nature Microbiology	figshare	10.6084/m9.figshare.4903080	na	na	na
TARA_ANW_MAG_00075	Delmont et al. (2018) Nature Microbiology	figshare	10.6084/m9.figshare.4903081	na	na	na
TARA_ANW_MAG_00076	Delmont et al. (2018) Nature Microbiology	figshare	10.6084/m9.figshare.4903082	na	na	na
TARA_ANW_MAG_00077	Delmont et al. (2018) Nature Microbiology	figshare	10.6084/m9.figshare.4903083	na	na	na
TARA_ANW_MAG_00079	Delmont et al. (2018) Nature Microbiology	figshare	10.6084/m9.figshare.4903084	na	na	na
TARA_ANW_MAG_00080	Delmont et al. (2018) Nature Microbiology	figshare	10.6084/m9.figshare.4903085	na	na	na
TARA_ANW_MAG_00081	Delmont et al. (2018) Nature Microbiology	figshare	10.6084/m9.figshare.4903086	na	na	na
TARA_ANW_MAG_00082	Delmont et al. (2018) Nature Microbiology	figshare	10.6084/m9.figshare.4903087	na	na	na
TARA_ANW_MAG_00083	Delmont et al. (2018) Nature Microbiology	figshare	10.6084/m9.figshare.4903088	na	na	na
TARA_ANW_MAG_00084	Delmont et al. (2018) Nature Microbiology	figshare	10.6084/m9.figshare.4903089	na	na	na
TARA_ANW_MAG_00085	Delmont et al. (2018) Nature Microbiology	figshare	10.6084/m9.figshare.4903090	na	na	na
TARA_ANW_MAG_00087	Delmont et al. (2018) Nature Microbiology	figshare	10.6084/m9.figshare.4903091	na	na	na
TARA_ANW_MAG_00088	Delmont et al. (2018) Nature Microbiology	figshare	10.6084/m9.figshare.4903092	na	na	na
TARA_ASE_MAG_00002	Delmont et al. (2018) Nature Microbiology	figshare	10.6084/m9.figshare.4903093	na	na	na
TARA_ASE_MAG_00003	Delmont et al. (2018) Nature Microbiology	figshare	10.6084/m9.figshare.4903094	na	na	na
TARA_ASE_MAG_00004	Delmont et al. (2018) Nature Microbiology	figshare	10.6084/m9.figshare.4903095	na	na	na
TARA_ASE_MAG_00006	Delmont et al. (2018) Nature Microbiology	figshare	10.6084/m9.figshare.4903096	na	na	na
TARA_ASE_MAG_00007	Delmont et al. (2018) Nature Microbiology	figshare	10.6084/m9.figshare.4903097	na	na	na
TARA_ASE_MAG_00008	Delmont et al. (2018) Nature Microbiology	figshare	10.6084/m9.figshare.4903098	na	na	na
TARA_ASE_MAG_00009	Delmont et al. (2018) Nature Microbiology	figshare	10.6084/m9.figshare.4903099	na	na	na
TARA_ASE_MAG_00010	Delmont et al. (2018) Nature Microbiology	figshare	10.6084/m9.figshare.4903100	na	na	na
TARA_ASE_MAG_00011	Delmont et al. (2018) Nature Microbiology	figshare	10.6084/m9.figshare.4903101	na	na	na
TARA_ASE_MAG_00012	Delmont et al. (2018) Nature Microbiology	figshare	10.6084/m9.figshare.4903102	na	na	na
TARA_ASE_MAG_00014	Delmont et al. (2018) Nature Microbiology	figshare	10.6084/m9.figshare.4903103	na	na	na
TARA_ASE_MAG_00015	Delmont et al. (2018) Nature Microbiology	figshare	10.6084/m9.figshare.4903104	na	na	na
TARA_ASE_MAG_00016	Delmont et al. (2018) Nature Microbiology	figshare	10.6084/m9.figshare.4903105	na	na	na
TARA_ASE_MAG_00017	Delmont et al. (2018) Nature Microbiology	figshare	10.6084/m9.figshare.4903106	na	na	na
TARA_ASE_MAG_00018	Delmont et al. (2018) Nature Microbiology	figshare	10.6084/m9.figshare.4903107	na	na	na
TARA_ASE_MAG_00019	Delmont et al. (2018) Nature Microbiology	figshare	10.6084/m9.figshare.4903108	na	na	na
TARA_ASE_MAG_00020	Delmont et al. (2018) Nature Microbiology	figshare	10.6084/m9.figshare.4903109	na	na	na
TARA_ASE_MAG_00021	Delmont et al. (2018) Nature Microbiology	figshare	10.6084/m9.figshare.4903110	na	na	na
TARA_ASE_MAG_00022	Delmont et al. (2018) Nature Microbiology	figshare	10.6084/m9.figshare.4903111	na	na	na
TARA_ASE_MAG_00024	Delmont et al. (2018) Nature Microbiology	figshare	10.6084/m9.figshare.4903112	na	na	na
TARA_ASE_MAG_00025	Delmont et al. (2018) Nature Microbiology	figshare	10.6084/m9.figshare.4903113	na	na	na
TARA_ASE_MAG_00026	Delmont et al. (2018) Nature Microbiology	figshare	10.6084/m9.figshare.4903114	na	na	na
TARA_ASE_MAG_00027	Delmont et al. (2018) Nature Microbiology	figshare	10.6084/m9.figshare.4903115	na	na	na
TARA_ASE_MAG_00028	Delmont et al. (2018) Nature Microbiology	figshare	10.6084/m9.figshare.4903116	na	na	na
TARA_ASE_MAG_00029	Delmont et al. (2018) Nature Microbiology	figshare	10.6084/m9.figshare.4903117	na	na	na
TARA_ASE_MAG_00031	Delmont et al. (2018) Nature Microbiology	figshare	10.6084/m9.figshare.4903118	na	na	na
TARA_ASE_MAG_00032	Delmont et al. (2018) Nature Microbiology	figshare	10.6084/m9.figshare.4903119	na	na	na
TARA_ASE_MAG_00033	Delmont et al. (2018) Nature Microbiology	figshare	10.6084/m9.figshare.4903120	na	na	na
TARA_ASE_MAG_00035	Delmont et al. (2018) Nature Microbiology	figshare	10.6084/m9.figshare.4903121	na	na	na
TARA_ASE_MAG_00036	Delmont et al. (2018) Nature Microbiology	figshare	10.6084/m9.figshare.4903122	na	na	na
TARA_ASE_MAG_00037	Delmont et al. (2018) Nature Microbiology	figshare	10.6084/m9.figshare.4903123	na	na	na
TARA_ASW_MAG_00001	Delmont et al. (2018) Nature Microbiology	figshare	10.6084/m9.figshare.4903124	na	na	na
TARA_ASW_MAG_00002	Delmont et al. (2018) Nature Microbiology	figshare	10.6084/m9.figshare.4903125	na	na	na
TARA_ASW_MAG_00003	Delmont et al. (2018) Nature Microbiology	figshare	10.6084/m9.figshare.4903126	na	na	na
TARA_ASW_MAG_00004	Delmont et al. (2018) Nature Microbiology	figshare	10.6084/m9.figshare.4903127	na	na	na
TARA_ASW_MAG_00008	Delmont et al. (2018) Nature Microbiology	figshare	10.6084/m9.figshare.4903128	na	na	na
TARA_ASW_MAG_00010	Delmont et al. (2018) Nature Microbiology	figshare	10.6084/m9.figshare.4903129	na	na	na
TARA_ASW_MAG_00011	Delmont et al. (2018) Nature Microbiology	figshare	10.6084/m9.figshare.4903130	na	na	na
TARA_ASW_MAG_00012	Delmont et al. (2018) Nature Microbiology	figshare	10.6084/m9.figshare.4903131	na	na	na
TARA_ASW_MAG_00013	Delmont et al. (2018) Nature Microbiology	figshare	10.6084/m9.figshare.4903132	na	na	na
TARA_ASW_MAG_00014	Delmont et al. (2018) Nature Microbiology	figshare	10.6084/m9.figshare.4903133	na	na	na
TARA_ASW_MAG_00015	Delmont et al. (2018) Nature Microbiology	figshare	10.6084/m9.figshare.4903134	na	na	na
TARA_ASW_MAG_00016	Delmont et al. (2018) Nature Microbiology	figshare	10.6084/m9.figshare.4903135	na	na	na
TARA_ASW_MAG_00017	Delmont et al. (2018) Nature Microbiology	figshare	10.6084/m9.figshare.4903136	na	na	na
TARA_ASW_MAG_00018	Delmont et al. (2018) Nature Microbiology	figshare	10.6084/m9.figshare.4903137	na	na	na
TARA_ASW_MAG_00019	Delmont et al. (2018) Nature Microbiology	figshare	10.6084/m9.figshare.4903138	na	na	na
TARA_ASW_MAG_00020	Delmont et al. (2018) Nature Microbiology	figshare	10.6084/m9.figshare.4903139	na	na	na
TARA_ASW_MAG_00021	Delmont et al. (2018) Nature Microbiology	figshare	10.6084/m9.figshare.4903140	na	na	na
TARA_ASW_MAG_00022	Delmont et al. (2018) Nature Microbiology	figshare	10.6084/m9.figshare.4903141	na	na	na
TARA_ASW_MAG_00023	Delmont et al. (2018) Nature Microbiology	figshare	10.6084/m9.figshare.4903142	na	na	na
TARA_ASW_MAG_00024	Delmont et al. (2018) Nature Microbiology	figshare	10.6084/m9.figshare.4903143	na	na	na
TARA_ASW_MAG_00025	Delmont et al. (2018) Nature Microbiology	figshare	10.6084/m9.figshare.4903144	na	na	na
TARA_ASW_MAG_00026	Delmont et al. (2018) Nature Microbiology	figshare	10.6084/m9.figshare.4903145	na	na	na
TARA_ASW_MAG_00029	Delmont et al. (2018) Nature Microbiology	figshare	10.6084/m9.figshare.4903146	na	na	na
TARA_ASW_MAG_00031	Delmont et al. (2018) Nature Microbiology	figshare	10.6084/m9.figshare.4903147	na	na	na
TARA_ASW_MAG_00032	Delmont et al. (2018) Nature Microbiology	figshare	10.6084/m9.figshare.4903148	na	na	na
TARA_ASW_MAG_00033	Delmont et al. (2018) Nature Microbiology	figshare	10.6084/m9.figshare.4903149	na	na	na
TARA_ASW_MAG_00034	Delmont et al. (2018) Nature Microbiology	figshare	10.6084/m9.figshare.4903150	na	na	na
TARA_ASW_MAG_00035	Delmont et al. (2018) Nature Microbiology	figshare	10.6084/m9.figshare.4903151	na	na	na
TARA_ASW_MAG_00036	Delmont et al. (2018) Nature Microbiology	figshare	10.6084/m9.figshare.4903152	na	na	na
TARA_ASW_MAG_00037	Delmont et al. (2018) Nature Microbiology	figshare	10.6084/m9.figshare.4903153	na	na	na
TARA_ASW_MAG_00038	Delmont et al. (2018) Nature Microbiology	figshare	10.6084/m9.figshare.4903154	na	na	na
TARA_ASW_MAG_00039	Delmont et al. (2018) Nature Microbiology	figshare	10.6084/m9.figshare.4903155	na	na	na
TARA_ASW_MAG_00040	Delmont et al. (2018) Nature Microbiology	figshare	10.6084/m9.figshare.4903156	na	na	na
TARA_ASW_MAG_00041	Delmont et al. (2018) Nature Microbiology	figshare	10.6084/m9.figshare.4903157	na	na	na
TARA_ASW_MAG_00042	Delmont et al. (2018) Nature Microbiology	figshare	10.6084/m9.figshare.4903158	na	na	na
TARA_ASW_MAG_00043	Delmont et al. (2018) Nature Microbiology	figshare	10.6084/m9.figshare.4903159	na	na	na
TARA_ASW_MAG_00044	Delmont et al. (2018) Nature Microbiology	figshare	10.6084/m9.figshare.4903160	na	na	na
TARA_ASW_MAG_00045	Delmont et al. (2018) Nature Microbiology	figshare	10.6084/m9.figshare.4903161	na	na	na
TARA_ASW_MAG_00046	Delmont et al. (2018) Nature Microbiology	figshare	10.6084/m9.figshare.4903162	na	na	na
TARA_ASW_MAG_00047	Delmont et al. (2018) Nature Microbiology	figshare	10.6084/m9.figshare.4903163	na	na	na
TARA_ION_MAG_00001	Delmont et al. (2018) Nature Microbiology	figshare	10.6084/m9.figshare.4903164	na	na	na
TARA_ION_MAG_00002	Delmont et al. (2018) Nature Microbiology	figshare	10.6084/m9.figshare.4903165	na	na	na
TARA_ION_MAG_00004	Delmont et al. (2018) Nature Microbiology	figshare	10.6084/m9.figshare.4903166	na	na	na
TARA_ION_MAG_00005	Delmont et al. (2018) Nature Microbiology	figshare	10.6084/m9.figshare.4903167	na	na	na
TARA_ION_MAG_00006	Delmont et al. (2018) Nature Microbiology	figshare	10.6084/m9.figshare.4903168	na	na	na
TARA_ION_MAG_00007	Delmont et al. (2018) Nature Microbiology	figshare	10.6084/m9.figshare.4903169	na	na	na
TARA_ION_MAG_00009	Delmont et al. (2018) Nature Microbiology	figshare	10.6084/m9.figshare.4903170	na	na	na
TARA_ION_MAG_00011	Delmont et al. (2018) Nature Microbiology	figshare	10.6084/m9.figshare.4903171	na	na	na
TARA_ION_MAG_00012	Delmont et al. (2018) Nature Microbiology	figshare	10.6084/m9.figshare.4903172	na	na	na
TARA_ION_MAG_00014	Delmont et al. (2018) Nature Microbiology	figshare	10.6084/m9.figshare.4903173	na	na	na
TARA_ION_MAG_00015	Delmont et al. (2018) Nature Microbiology	figshare	10.6084/m9.figshare.4903174	na	na	na
TARA_ION_MAG_00016	Delmont et al. (2018) Nature Microbiology	figshare	10.6084/m9.figshare.4903175	na	na	na
TARA_ION_MAG_00017	Delmont et al. (2018) Nature Microbiology	figshare	10.6084/m9.figshare.4903176	na	na	na
TARA_ION_MAG_00018	Delmont et al. (2018) Nature Microbiology	figshare	10.6084/m9.figshare.4903177	na	na	na
TARA_ION_MAG_00020	Delmont et al. (2018) Nature Microbiology	figshare	10.6084/m9.figshare.4903178	na	na	na
TARA_ION_MAG_00022	Delmont et al. (2018) Nature Microbiology	figshare	10.6084/m9.figshare.4903179	na	na	na
TARA_ION_MAG_00023	Delmont et al. (2018) Nature Microbiology	figshare	10.6084/m9.figshare.4903180	na	na	na
TARA_ION_MAG_00024	Delmont et al. (2018) Nature Microbiology	figshare	10.6084/m9.figshare.4903181	na	na	na
TARA_ION_MAG_00025	Delmont et al. (2018) Nature Microbiology	figshare	10.6084/m9.figshare.4903182	na	na	na
TARA_ION_MAG_00026	Delmont et al. (2018) Nature Microbiology	figshare	10.6084/m9.figshare.4903183	na	na	na
TARA_ION_MAG_00027	Delmont et al. (2018) Nature Microbiology	figshare	10.6084/m9.figshare.4903184	na	na	na
TARA_ION_MAG_00028	Delmont et al. (2018) Nature Microbiology	figshare	10.6084/m9.figshare.4903185	na	na	na
TARA_ION_MAG_00029	Delmont et al. (2018) Nature Microbiology	figshare	10.6084/m9.figshare.4903186	na	na	na
TARA_ION_MAG_00031	Delmont et al. (2018) Nature Microbiology	figshare	10.6084/m9.figshare.4903187	na	na	na
TARA_ION_MAG_00032	Delmont et al. (2018) Nature Microbiology	figshare	10.6084/m9.figshare.4903188	na	na	na
TARA_ION_MAG_00033	Delmont et al. (2018) Nature Microbiology	figshare	10.6084/m9.figshare.4903189	na	na	na
TARA_ION_MAG_00034	Delmont et al. (2018) Nature Microbiology	figshare	10.6084/m9.figshare.4903190	na	na	na
TARA_ION_MAG_00035	Delmont et al. (2018) Nature Microbiology	figshare	10.6084/m9.figshare.4903191	na	na	na
TARA_ION_MAG_00036	Delmont et al. (2018) Nature Microbiology	figshare	10.6084/m9.figshare.4903192	na	na	na
TARA_ION_MAG_00037	Delmont et al. (2018) Nature Microbiology	figshare	10.6084/m9.figshare.4903193	na	na	na
TARA_ION_MAG_00038	Delmont et al. (2018) Nature Microbiology	figshare	10.6084/m9.figshare.4903194	na	na	na
TARA_ION_MAG_00039	Delmont et al. (2018) Nature Microbiology	figshare	10.6084/m9.figshare.4903195	na	na	na
TARA_ION_MAG_00040	Delmont et al. (2018) Nature Microbiology	figshare	10.6084/m9.figshare.4903196	na	na	na
TARA_ION_MAG_00041	Delmont et al. (2018) Nature Microbiology	figshare	10.6084/m9.figshare.4903197	na	na	na
TARA_ION_MAG_00042	Delmont et al. (2018) Nature Microbiology	figshare	10.6084/m9.figshare.4903198	na	na	na
TARA_ION_MAG_00043	Delmont et al. (2018) Nature Microbiology	figshare	10.6084/m9.figshare.4903199	na	na	na
TARA_ION_MAG_00044	Delmont et al. (2018) Nature Microbiology	figshare	10.6084/m9.figshare.4903200	na	na	na
TARA_ION_MAG_00045	Delmont et al. (2018) Nature Microbiology	figshare	10.6084/m9.figshare.4903201	na	na	na
TARA_ION_MAG_00046	Delmont et al. (2018) Nature Microbiology	figshare	10.6084/m9.figshare.4903202	na	na	na
TARA_ION_MAG_00047	Delmont et al. (2018) Nature Microbiology	figshare	10.6084/m9.figshare.4903203	na	na	na
TARA_ION_MAG_00048	Delmont et al. (2018) Nature Microbiology	figshare	10.6084/m9.figshare.4903204	na	na	na
TARA_ION_MAG_00049	Delmont et al. (2018) Nature Microbiology	figshare	10.6084/m9.figshare.4903205	na	na	na
TARA_ION_MAG_00050	Delmont et al. (2018) Nature Microbiology	figshare	10.6084/m9.figshare.4903206	na	na	na
TARA_ION_MAG_00051	Delmont et al. (2018) Nature Microbiology	figshare	10.6084/m9.figshare.4903207	na	na	na
TARA_ION_MAG_00052	Delmont et al. (2018) Nature Microbiology	figshare	10.6084/m9.figshare.4903208	na	na	na
TARA_ION_MAG_00053	Delmont et al. (2018) Nature Microbiology	figshare	10.6084/m9.figshare.4903209	na	na	na
TARA_ION_MAG_00054	Delmont et al. (2018) Nature Microbiology	figshare	10.6084/m9.figshare.4903210	na	na	na
TARA_ION_MAG_00055	Delmont et al. (2018) Nature Microbiology	figshare	10.6084/m9.figshare.4903211	na	na	na
TARA_ION_MAG_00056	Delmont et al. (2018) Nature Microbiology	figshare	10.6084/m9.figshare.4903212	na	na	na
TARA_ION_MAG_00057	Delmont et al. (2018) Nature Microbiology	figshare	10.6084/m9.figshare.4903213	na	na	na
TARA_ION_MAG_00058	Delmont et al. (2018) Nature Microbiology	figshare	10.6084/m9.figshare.4903214	na	na	na
TARA_ION_MAG_00059	Delmont et al. (2018) Nature Microbiology	figshare	10.6084/m9.figshare.4903215	na	na	na
TARA_ION_MAG_00060	Delmont et al. (2018) Nature Microbiology	figshare	10.6084/m9.figshare.4903216	na	na	na
TARA_ION_MAG_00064	Delmont et al. (2018) Nature Microbiology	figshare	10.6084/m9.figshare.4903217	na	na	na
TARA_ION_MAG_00066	Delmont et al. (2018) Nature Microbiology	figshare	10.6084/m9.figshare.4903218	na	na	na
TARA_ION_MAG_00067	Delmont et al. (2018) Nature Microbiology	figshare	10.6084/m9.figshare.4903219	na	na	na
TARA_ION_MAG_00070	Delmont et al. (2018) Nature Microbiology	figshare	10.6084/m9.figshare.4903220	na	na	na
TARA_ION_MAG_00071	Delmont et al. (2018) Nature Microbiology	figshare	10.6084/m9.figshare.4903221	na	na	na
TARA_ION_MAG_00072	Delmont et al. (2018) Nature Microbiology	figshare	10.6084/m9.figshare.4903222	na	na	na
TARA_ION_MAG_00073	Delmont et al. (2018) Nature Microbiology	figshare	10.6084/m9.figshare.4903223	na	na	na
TARA_ION_MAG_00074	Delmont et al. (2018) Nature Microbiology	figshare	10.6084/m9.figshare.4903224	na	na	na
TARA_IOS_MAG_00001	Delmont et al. (2018) Nature Microbiology	figshare	10.6084/m9.figshare.4903225	na	na	na
TARA_IOS_MAG_00003	Delmont et al. (2018) Nature Microbiology	figshare	10.6084/m9.figshare.4903226	na	na	na
TARA_IOS_MAG_00004	Delmont et al. (2018) Nature Microbiology	figshare	10.6084/m9.figshare.4903227	na	na	na
TARA_IOS_MAG_00005	Delmont et al. (2018) Nature Microbiology	figshare	10.6084/m9.figshare.4903228	na	na	na
TARA_IOS_MAG_00006	Delmont et al. (2018) Nature Microbiology	figshare	10.6084/m9.figshare.4903229	na	na	na
TARA_IOS_MAG_00008	Delmont et al. (2018) Nature Microbiology	figshare	10.6084/m9.figshare.4903230	na	na	na
TARA_IOS_MAG_00010	Delmont et al. (2018) Nature Microbiology	figshare	10.6084/m9.figshare.4903231	na	na	na
TARA_IOS_MAG_00011	Delmont et al. (2018) Nature Microbiology	figshare	10.6084/m9.figshare.4903232	na	na	na
TARA_IOS_MAG_00012	Delmont et al. (2018) Nature Microbiology	figshare	10.6084/m9.figshare.4903233	na	na	na
TARA_IOS_MAG_00013	Delmont et al. (2018) Nature Microbiology	figshare	10.6084/m9.figshare.4903234	na	na	na
TARA_IOS_MAG_00014	Delmont et al. (2018) Nature Microbiology	figshare	10.6084/m9.figshare.4903235	na	na	na
TARA_IOS_MAG_00015	Delmont et al. (2018) Nature Microbiology	figshare	10.6084/m9.figshare.4903236	na	na	na
TARA_IOS_MAG_00016	Delmont et al. (2018) Nature Microbiology	figshare	10.6084/m9.figshare.4903237	na	na	na
TARA_IOS_MAG_00017	Delmont et al. (2018) Nature Microbiology	figshare	10.6084/m9.figshare.4903238	na	na	na
TARA_IOS_MAG_00018	Delmont et al. (2018) Nature Microbiology	figshare	10.6084/m9.figshare.4903239	na	na	na
TARA_IOS_MAG_00019	Delmont et al. (2018) Nature Microbiology	figshare	10.6084/m9.figshare.4903240	na	na	na
TARA_IOS_MAG_00020	Delmont et al. (2018) Nature Microbiology	figshare	10.6084/m9.figshare.4903241	na	na	na
TARA_IOS_MAG_00022	Delmont et al. (2018) Nature Microbiology	figshare	10.6084/m9.figshare.4903242	na	na	na
TARA_IOS_MAG_00023	Delmont et al. (2018) Nature Microbiology	figshare	10.6084/m9.figshare.4903243	na	na	na
TARA_IOS_MAG_00024	Delmont et al. (2018) Nature Microbiology	figshare	10.6084/m9.figshare.4903244	na	na	na
TARA_IOS_MAG_00025	Delmont et al. (2018) Nature Microbiology	figshare	10.6084/m9.figshare.4903245	na	na	na
TARA_IOS_MAG_00026	Delmont et al. (2018) Nature Microbiology	figshare	10.6084/m9.figshare.4903246	na	na	na
TARA_IOS_MAG_00027	Delmont et al. (2018) Nature Microbiology	figshare	10.6084/m9.figshare.4903247	na	na	na
TARA_IOS_MAG_00028	Delmont et al. (2018) Nature Microbiology	figshare	10.6084/m9.figshare.4903248	na	na	na
TARA_IOS_MAG_00029	Delmont et al. (2018) Nature Microbiology	figshare	10.6084/m9.figshare.4903249	na	na	na
TARA_IOS_MAG_00030	Delmont et al. (2018) Nature Microbiology	figshare	10.6084/m9.figshare.4903250	na	na	na
TARA_IOS_MAG_00031	Delmont et al. (2018) Nature Microbiology	figshare	10.6084/m9.figshare.4903251	na	na	na
TARA_IOS_MAG_00033	Delmont et al. (2018) Nature Microbiology	figshare	10.6084/m9.figshare.4903252	na	na	na
TARA_IOS_MAG_00034	Delmont et al. (2018) Nature Microbiology	figshare	10.6084/m9.figshare.4903253	na	na	na
TARA_IOS_MAG_00035	Delmont et al. (2018) Nature Microbiology	figshare	10.6084/m9.figshare.4903254	na	na	na
TARA_IOS_MAG_00036	Delmont et al. (2018) Nature Microbiology	figshare	10.6084/m9.figshare.4903255	na	na	na
TARA_IOS_MAG_00037	Delmont et al. (2018) Nature Microbiology	figshare	10.6084/m9.figshare.4903256	na	na	na
TARA_IOS_MAG_00038	Delmont et al. (2018) Nature Microbiology	figshare	10.6084/m9.figshare.4903257	na	na	na
TARA_IOS_MAG_00039	Delmont et al. (2018) Nature Microbiology	figshare	10.6084/m9.figshare.4903258	na	na	na
TARA_IOS_MAG_00040	Delmont et al. (2018) Nature Microbiology	figshare	10.6084/m9.figshare.4903259	na	na	na
TARA_IOS_MAG_00041	Delmont et al. (2018) Nature Microbiology	figshare	10.6084/m9.figshare.4903260	na	na	na
TARA_IOS_MAG_00042	Delmont et al. (2018) Nature Microbiology	figshare	10.6084/m9.figshare.4903261	na	na	na
TARA_IOS_MAG_00044	Delmont et al. (2018) Nature Microbiology	figshare	10.6084/m9.figshare.4903262	na	na	na
TARA_IOS_MAG_00045	Delmont et al. (2018) Nature Microbiology	figshare	10.6084/m9.figshare.4903263	na	na	na
TARA_IOS_MAG_00046	Delmont et al. (2018) Nature Microbiology	figshare	10.6084/m9.figshare.4903264	na	na	na
TARA_IOS_MAG_00047	Delmont et al. (2018) Nature Microbiology	figshare	10.6084/m9.figshare.4903265	na	na	na
TARA_IOS_MAG_00048	Delmont et al. (2018) Nature Microbiology	figshare	10.6084/m9.figshare.4903266	na	na	na
TARA_IOS_MAG_00049	Delmont et al. (2018) Nature Microbiology	figshare	10.6084/m9.figshare.4903267	na	na	na
TARA_IOS_MAG_00051	Delmont et al. (2018) Nature Microbiology	figshare	10.6084/m9.figshare.4903268	na	na	na
TARA_IOS_MAG_00052	Delmont et al. (2018) Nature Microbiology	figshare	10.6084/m9.figshare.4903269	na	na	na
TARA_IOS_MAG_00053	Delmont et al. (2018) Nature Microbiology	figshare	10.6084/m9.figshare.4903270	na	na	na
TARA_IOS_MAG_00055	Delmont et al. (2018) Nature Microbiology	figshare	10.6084/m9.figshare.4903271	na	na	na
TARA_IOS_MAG_00056	Delmont et al. (2018) Nature Microbiology	figshare	10.6084/m9.figshare.4903272	na	na	na
TARA_IOS_MAG_00057	Delmont et al. (2018) Nature Microbiology	figshare	10.6084/m9.figshare.4903273	na	na	na
TARA_IOS_MAG_00058	Delmont et al. (2018) Nature Microbiology	figshare	10.6084/m9.figshare.4903274	na	na	na
TARA_IOS_MAG_00059	Delmont et al. (2018) Nature Microbiology	figshare	10.6084/m9.figshare.4903275	na	na	na
TARA_IOS_MAG_00060	Delmont et al. (2018) Nature Microbiology	figshare	10.6084/m9.figshare.4903276	na	na	na
TARA_IOS_MAG_00061	Delmont et al. (2018) Nature Microbiology	figshare	10.6084/m9.figshare.4903277	na	na	na
TARA_IOS_MAG_00062	Delmont et al. (2018) Nature Microbiology	figshare	10.6084/m9.figshare.4903278	na	na	na
TARA_IOS_MAG_00063	Delmont et al. (2018) Nature Microbiology	figshare	10.6084/m9.figshare.4903279	na	na	na
TARA_IOS_MAG_00064	Delmont et al. (2018) Nature Microbiology	figshare	10.6084/m9.figshare.4903280	na	na	na
TARA_IOS_MAG_00065	Delmont et al. (2018) Nature Microbiology	figshare	10.6084/m9.figshare.4903281	na	na	na
TARA_IOS_MAG_00066	Delmont et al. (2018) Nature Microbiology	figshare	10.6084/m9.figshare.4903282	na	na	na
TARA_IOS_MAG_00067	Delmont et al. (2018) Nature Microbiology	figshare	10.6084/m9.figshare.4903283	na	na	na
TARA_IOS_MAG_00068	Delmont et al. (2018) Nature Microbiology	figshare	10.6084/m9.figshare.4903284	na	na	na
TARA_IOS_MAG_00069	Delmont et al. (2018) Nature Microbiology	figshare	10.6084/m9.figshare.4903285	na	na	na
TARA_IOS_MAG_00070	Delmont et al. (2018) Nature Microbiology	figshare	10.6084/m9.figshare.4903286	na	na	na
TARA_IOS_MAG_00073	Delmont et al. (2018) Nature Microbiology	figshare	10.6084/m9.figshare.4903287	na	na	na
TARA_IOS_MAG_00075	Delmont et al. (2018) Nature Microbiology	figshare	10.6084/m9.figshare.4903288	na	na	na
TARA_IOS_MAG_00076	Delmont et al. (2018) Nature Microbiology	figshare	10.6084/m9.figshare.4903289	na	na	na
TARA_IOS_MAG_00077	Delmont et al. (2018) Nature Microbiology	figshare	10.6084/m9.figshare.4903290	na	na	na
TARA_IOS_MAG_00078	Delmont et al. (2018) Nature Microbiology	figshare	10.6084/m9.figshare.4903291	na	na	na
TARA_MED_MAG_00001	Delmont et al. (2018) Nature Microbiology	figshare	10.6084/m9.figshare.4903292	na	na	na
TARA_MED_MAG_00002	Delmont et al. (2018) Nature Microbiology	figshare	10.6084/m9.figshare.4903293	na	na	na
TARA_MED_MAG_00003	Delmont et al. (2018) Nature Microbiology	figshare	10.6084/m9.figshare.4903294	na	na	na
TARA_MED_MAG_00004	Delmont et al. (2018) Nature Microbiology	figshare	10.6084/m9.figshare.4903295	na	na	na
TARA_MED_MAG_00005	Delmont et al. (2018) Nature Microbiology	figshare	10.6084/m9.figshare.4903296	na	na	na
TARA_MED_MAG_00006	Delmont et al. (2018) Nature Microbiology	figshare	10.6084/m9.figshare.4903297	na	na	na
TARA_MED_MAG_00008	Delmont et al. (2018) Nature Microbiology	figshare	10.6084/m9.figshare.4903298	na	na	na
TARA_MED_MAG_00009	Delmont et al. (2018) Nature Microbiology	figshare	10.6084/m9.figshare.4903299	na	na	na
TARA_MED_MAG_00010	Delmont et al. (2018) Nature Microbiology	figshare	10.6084/m9.figshare.4903300	na	na	na
TARA_MED_MAG_00011	Delmont et al. (2018) Nature Microbiology	figshare	10.6084/m9.figshare.4903301	na	na	na
TARA_MED_MAG_00012	Delmont et al. (2018) Nature Microbiology	figshare	10.6084/m9.figshare.4903302	na	na	na
TARA_MED_MAG_00013	Delmont et al. (2018) Nature Microbiology	figshare	10.6084/m9.figshare.4903303	na	na	na
TARA_MED_MAG_00014	Delmont et al. (2018) Nature Microbiology	figshare	10.6084/m9.figshare.4903304	na	na	na
TARA_MED_MAG_00015	Delmont et al. (2018) Nature Microbiology	figshare	10.6084/m9.figshare.4903305	na	na	na
TARA_MED_MAG_00016	Delmont et al. (2018) Nature Microbiology	figshare	10.6084/m9.figshare.4903306	na	na	na
TARA_MED_MAG_00017	Delmont et al. (2018) Nature Microbiology	figshare	10.6084/m9.figshare.4903307	na	na	na
TARA_MED_MAG_00018	Delmont et al. (2018) Nature Microbiology	figshare	10.6084/m9.figshare.4903308	na	na	na
TARA_MED_MAG_00019	Delmont et al. (2018) Nature Microbiology	figshare	10.6084/m9.figshare.4903309	na	na	na
TARA_MED_MAG_00020	Delmont et al. (2018) Nature Microbiology	figshare	10.6084/m9.figshare.4903310	na	na	na
TARA_MED_MAG_00021	Delmont et al. (2018) Nature Microbiology	figshare	10.6084/m9.figshare.4903311	na	na	na
TARA_MED_MAG_00022	Delmont et al. (2018) Nature Microbiology	figshare	10.6084/m9.figshare.4903312	na	na	na
TARA_MED_MAG_00023	Delmont et al. (2018) Nature Microbiology	figshare	10.6084/m9.figshare.4903313	na	na	na
TARA_MED_MAG_00024	Delmont et al. (2018) Nature Microbiology	figshare	10.6084/m9.figshare.4903314	na	na	na
TARA_MED_MAG_00025	Delmont et al. (2018) Nature Microbiology	figshare	10.6084/m9.figshare.4903315	na	na	na
TARA_MED_MAG_00026	Delmont et al. (2018) Nature Microbiology	figshare	10.6084/m9.figshare.4903316	na	na	na
TARA_MED_MAG_00027	Delmont et al. (2018) Nature Microbiology	figshare	10.6084/m9.figshare.4903317	na	na	na
TARA_MED_MAG_00028	Delmont et al. (2018) Nature Microbiology	figshare	10.6084/m9.figshare.4903318	na	na	na
TARA_MED_MAG_00029	Delmont et al. (2018) Nature Microbiology	figshare	10.6084/m9.figshare.4903319	na	na	na
TARA_MED_MAG_00030	Delmont et al. (2018) Nature Microbiology	figshare	10.6084/m9.figshare.4903320	na	na	na
TARA_MED_MAG_00031	Delmont et al. (2018) Nature Microbiology	figshare	10.6084/m9.figshare.4903321	na	na	na
TARA_MED_MAG_00032	Delmont et al. (2018) Nature Microbiology	figshare	10.6084/m9.figshare.4903322	na	na	na
TARA_MED_MAG_00033	Delmont et al. (2018) Nature Microbiology	figshare	10.6084/m9.figshare.4903323	na	na	na
TARA_MED_MAG_00034	Delmont et al. (2018) Nature Microbiology	figshare	10.6084/m9.figshare.4903324	na	na	na
TARA_MED_MAG_00035	Delmont et al. (2018) Nature Microbiology	figshare	10.6084/m9.figshare.4903325	na	na	na
TARA_MED_MAG_00036	Delmont et al. (2018) Nature Microbiology	figshare	10.6084/m9.figshare.4903326	na	na	na
TARA_MED_MAG_00038	Delmont et al. (2018) Nature Microbiology	figshare	10.6084/m9.figshare.4903327	na	na	na
TARA_MED_MAG_00039	Delmont et al. (2018) Nature Microbiology	figshare	10.6084/m9.figshare.4903328	na	na	na
TARA_MED_MAG_00040	Delmont et al. (2018) Nature Microbiology	figshare	10.6084/m9.figshare.4903329	na	na	na
TARA_MED_MAG_00041	Delmont et al. (2018) Nature Microbiology	figshare	10.6084/m9.figshare.4903330	na	na	na
TARA_MED_MAG_00042	Delmont et al. (2018) Nature Microbiology	figshare	10.6084/m9.figshare.4903331	na	na	na
TARA_MED_MAG_00043	Delmont et al. (2018) Nature Microbiology	figshare	10.6084/m9.figshare.4903332	na	na	na
TARA_MED_MAG_00044	Delmont et al. (2018) Nature Microbiology	figshare	10.6084/m9.figshare.4903333	na	na	na
TARA_MED_MAG_00045	Delmont et al. (2018) Nature Microbiology	figshare	10.6084/m9.figshare.4903334	na	na	na
TARA_MED_MAG_00046	Delmont et al. (2018) Nature Microbiology	figshare	10.6084/m9.figshare.4903335	na	na	na
TARA_MED_MAG_00047	Delmont et al. (2018) Nature Microbiology	figshare	10.6084/m9.figshare.4903336	na	na	na
TARA_MED_MAG_00048	Delmont et al. (2018) Nature Microbiology	figshare	10.6084/m9.figshare.4903337	na	na	na
TARA_MED_MAG_00049	Delmont et al. (2018) Nature Microbiology	figshare	10.6084/m9.figshare.4903338	na	na	na
TARA_MED_MAG_00050	Delmont et al. (2018) Nature Microbiology	figshare	10.6084/m9.figshare.4903339	na	na	na
TARA_MED_MAG_00051	Delmont et al. (2018) Nature Microbiology	figshare	10.6084/m9.figshare.4903340	na	na	na
TARA_MED_MAG_00052	Delmont et al. (2018) Nature Microbiology	figshare	10.6084/m9.figshare.4903341	na	na	na
TARA_MED_MAG_00053	Delmont et al. (2018) Nature Microbiology	figshare	10.6084/m9.figshare.4903342	na	na	na
TARA_MED_MAG_00054	Delmont et al. (2018) Nature Microbiology	figshare	10.6084/m9.figshare.4903343	na	na	na
TARA_MED_MAG_00055	Delmont et al. (2018) Nature Microbiology	figshare	10.6084/m9.figshare.4903344	na	na	na
TARA_MED_MAG_00056	Delmont et al. (2018) Nature Microbiology	figshare	10.6084/m9.figshare.4903345	na	na	na
TARA_MED_MAG_00057	Delmont et al. (2018) Nature Microbiology	figshare	10.6084/m9.figshare.4903346	na	na	na
TARA_MED_MAG_00058	Delmont et al. (2018) Nature Microbiology	figshare	10.6084/m9.figshare.4903347	na	na	na
TARA_MED_MAG_00059	Delmont et al. (2018) Nature Microbiology	figshare	10.6084/m9.figshare.4903348	na	na	na
TARA_MED_MAG_00060	Delmont et al. (2018) Nature Microbiology	figshare	10.6084/m9.figshare.4903349	na	na	na
TARA_MED_MAG_00061	Delmont et al. (2018) Nature Microbiology	figshare	10.6084/m9.figshare.4903350	na	na	na
TARA_MED_MAG_00062	Delmont et al. (2018) Nature Microbiology	figshare	10.6084/m9.figshare.4903351	na	na	na
TARA_MED_MAG_00063	Delmont et al. (2018) Nature Microbiology	figshare	10.6084/m9.figshare.4903352	na	na	na
TARA_MED_MAG_00064	Delmont et al. (2018) Nature Microbiology	figshare	10.6084/m9.figshare.4903353	na	na	na
TARA_MED_MAG_00065	Delmont et al. (2018) Nature Microbiology	figshare	10.6084/m9.figshare.4903354	na	na	na
TARA_MED_MAG_00066	Delmont et al. (2018) Nature Microbiology	figshare	10.6084/m9.figshare.4903355	na	na	na
TARA_MED_MAG_00067	Delmont et al. (2018) Nature Microbiology	figshare	10.6084/m9.figshare.4903356	na	na	na
TARA_MED_MAG_00068	Delmont et al. (2018) Nature Microbiology	figshare	10.6084/m9.figshare.4903357	na	na	na
TARA_MED_MAG_00069	Delmont et al. (2018) Nature Microbiology	figshare	10.6084/m9.figshare.4903358	na	na	na
TARA_MED_MAG_00070	Delmont et al. (2018) Nature Microbiology	figshare	10.6084/m9.figshare.4903359	na	na	na
TARA_MED_MAG_00071	Delmont et al. (2018) Nature Microbiology	figshare	10.6084/m9.figshare.4903360	na	na	na
TARA_MED_MAG_00072	Delmont et al. (2018) Nature Microbiology	figshare	10.6084/m9.figshare.4903361	na	na	na
TARA_MED_MAG_00073	Delmont et al. (2018) Nature Microbiology	figshare	10.6084/m9.figshare.4903362	na	na	na
TARA_MED_MAG_00074	Delmont et al. (2018) Nature Microbiology	figshare	10.6084/m9.figshare.4903363	na	na	na
TARA_MED_MAG_00075	Delmont et al. (2018) Nature Microbiology	figshare	10.6084/m9.figshare.4903364	na	na	na
TARA_MED_MAG_00076	Delmont et al. (2018) Nature Microbiology	figshare	10.6084/m9.figshare.4903365	na	na	na
TARA_MED_MAG_00077	Delmont et al. (2018) Nature Microbiology	figshare	10.6084/m9.figshare.4903366	na	na	na
TARA_MED_MAG_00078	Delmont et al. (2018) Nature Microbiology	figshare	10.6084/m9.figshare.4903367	na	na	na
TARA_MED_MAG_00079	Delmont et al. (2018) Nature Microbiology	figshare	10.6084/m9.figshare.4903368	na	na	na
TARA_MED_MAG_00080	Delmont et al. (2018) Nature Microbiology	figshare	10.6084/m9.figshare.4903369	na	na	na
TARA_MED_MAG_00081	Delmont et al. (2018) Nature Microbiology	figshare	10.6084/m9.figshare.4903370	na	na	na
TARA_MED_MAG_00082	Delmont et al. (2018) Nature Microbiology	figshare	10.6084/m9.figshare.4903371	na	na	na
TARA_MED_MAG_00083	Delmont et al. (2018) Nature Microbiology	figshare	10.6084/m9.figshare.4903372	na	na	na
TARA_MED_MAG_00084	Delmont et al. (2018) Nature Microbiology	figshare	10.6084/m9.figshare.4903373	na	na	na
TARA_MED_MAG_00085	Delmont et al. (2018) Nature Microbiology	figshare	10.6084/m9.figshare.4903374	na	na	na
TARA_MED_MAG_00086	Delmont et al. (2018) Nature Microbiology	figshare	10.6084/m9.figshare.4903375	na	na	na
TARA_MED_MAG_00087	Delmont et al. (2018) Nature Microbiology	figshare	10.6084/m9.figshare.4903376	na	na	na
TARA_MED_MAG_00088	Delmont et al. (2018) Nature Microbiology	figshare	10.6084/m9.figshare.4903377	na	na	na
TARA_MED_MAG_00089	Delmont et al. (2018) Nature Microbiology	figshare	10.6084/m9.figshare.4903378	na	na	na
TARA_MED_MAG_00090	Delmont et al. (2018) Nature Microbiology	figshare	10.6084/m9.figshare.4903379	na	na	na
TARA_MED_MAG_00091	Delmont et al. (2018) Nature Microbiology	figshare	10.6084/m9.figshare.4903380	na	na	na
TARA_MED_MAG_00092	Delmont et al. (2018) Nature Microbiology	figshare	10.6084/m9.figshare.4903381	na	na	na
TARA_MED_MAG_00093	Delmont et al. (2018) Nature Microbiology	figshare	10.6084/m9.figshare.4903382	na	na	na
TARA_MED_MAG_00094	Delmont et al. (2018) Nature Microbiology	figshare	10.6084/m9.figshare.4903383	na	na	na
TARA_MED_MAG_00095	Delmont et al. (2018) Nature Microbiology	figshare	10.6084/m9.figshare.4903384	na	na	na
TARA_MED_MAG_00096	Delmont et al. (2018) Nature Microbiology	figshare	10.6084/m9.figshare.4903385	na	na	na
TARA_MED_MAG_00097	Delmont et al. (2018) Nature Microbiology	figshare	10.6084/m9.figshare.4903386	na	na	na
TARA_MED_MAG_00098	Delmont et al. (2018) Nature Microbiology	figshare	10.6084/m9.figshare.4903387	na	na	na
TARA_MED_MAG_00099	Delmont et al. (2018) Nature Microbiology	figshare	10.6084/m9.figshare.4903388	na	na	na
TARA_MED_MAG_00100	Delmont et al. (2018) Nature Microbiology	figshare	10.6084/m9.figshare.4903389	na	na	na
TARA_MED_MAG_00101	Delmont et al. (2018) Nature Microbiology	figshare	10.6084/m9.figshare.4903390	na	na	na
TARA_MED_MAG_00102	Delmont et al. (2018) Nature Microbiology	figshare	10.6084/m9.figshare.4903391	na	na	na
TARA_MED_MAG_00103	Delmont et al. (2018) Nature Microbiology	figshare	10.6084/m9.figshare.4903392	na	na	na
TARA_MED_MAG_00104	Delmont et al. (2018) Nature Microbiology	figshare	10.6084/m9.figshare.4903393	na	na	na
TARA_MED_MAG_00105	Delmont et al. (2018) Nature Microbiology	figshare	10.6084/m9.figshare.4903394	na	na	na
TARA_MED_MAG_00106	Delmont et al. (2018) Nature Microbiology	figshare	10.6084/m9.figshare.4903395	na	na	na
TARA_MED_MAG_00107	Delmont et al. (2018) Nature Microbiology	figshare	10.6084/m9.figshare.4903396	na	na	na
TARA_MED_MAG_00108	Delmont et al. (2018) Nature Microbiology	figshare	10.6084/m9.figshare.4903397	na	na	na
TARA_MED_MAG_00109	Delmont et al. (2018) Nature Microbiology	figshare	10.6084/m9.figshare.4903398	na	na	na
TARA_MED_MAG_00110	Delmont et al. (2018) Nature Microbiology	figshare	10.6084/m9.figshare.4903399	na	na	na
TARA_MED_MAG_00111	Delmont et al. (2018) Nature Microbiology	figshare	10.6084/m9.figshare.4903400	na	na	na
TARA_MED_MAG_00112	Delmont et al. (2018) Nature Microbiology	figshare	10.6084/m9.figshare.4903401	na	na	na
TARA_MED_MAG_00113	Delmont et al. (2018) Nature Microbiology	figshare	10.6084/m9.figshare.4903402	na	na	na
TARA_MED_MAG_00114	Delmont et al. (2018) Nature Microbiology	figshare	10.6084/m9.figshare.4903403	na	na	na
TARA_MED_MAG_00115	Delmont et al. (2018) Nature Microbiology	figshare	10.6084/m9.figshare.4903404	na	na	na
TARA_MED_MAG_00116	Delmont et al. (2018) Nature Microbiology	figshare	10.6084/m9.figshare.4903405	na	na	na
TARA_MED_MAG_00117	Delmont et al. (2018) Nature Microbiology	figshare	10.6084/m9.figshare.4903406	na	na	na
TARA_MED_MAG_00118	Delmont et al. (2018) Nature Microbiology	figshare	10.6084/m9.figshare.4903407	na	na	na
TARA_MED_MAG_00119	Delmont et al. (2018) Nature Microbiology	figshare	10.6084/m9.figshare.4903408	na	na	na
TARA_MED_MAG_00120	Delmont et al. (2018) Nature Microbiology	figshare	10.6084/m9.figshare.4903409	na	na	na
TARA_MED_MAG_00121	Delmont et al. (2018) Nature Microbiology	figshare	10.6084/m9.figshare.4903410	na	na	na
TARA_MED_MAG_00122	Delmont et al. (2018) Nature Microbiology	figshare	10.6084/m9.figshare.4903411	na	na	na
TARA_MED_MAG_00123	Delmont et al. (2018) Nature Microbiology	figshare	10.6084/m9.figshare.4903412	na	na	na
TARA_MED_MAG_00124	Delmont et al. (2018) Nature Microbiology	figshare	10.6084/m9.figshare.4903413	na	na	na
TARA_MED_MAG_00125	Delmont et al. (2018) Nature Microbiology	figshare	10.6084/m9.figshare.4903414	na	na	na
TARA_MED_MAG_00126	Delmont et al. (2018) Nature Microbiology	figshare	10.6084/m9.figshare.4903415	na	na	na
TARA_MED_MAG_00127	Delmont et al. (2018) Nature Microbiology	figshare	10.6084/m9.figshare.4903416	na	na	na
TARA_MED_MAG_00128	Delmont et al. (2018) Nature Microbiology	figshare	10.6084/m9.figshare.4903417	na	na	na
TARA_MED_MAG_00129	Delmont et al. (2018) Nature Microbiology	figshare	10.6084/m9.figshare.4903418	na	na	na
TARA_MED_MAG_00130	Delmont et al. (2018) Nature Microbiology	figshare	10.6084/m9.figshare.4903419	na	na	na
TARA_MED_MAG_00131	Delmont et al. (2018) Nature Microbiology	figshare	10.6084/m9.figshare.4903420	na	na	na
TARA_MED_MAG_00132	Delmont et al. (2018) Nature Microbiology	figshare	10.6084/m9.figshare.4903421	na	na	na
TARA_MED_MAG_00133	Delmont et al. (2018) Nature Microbiology	figshare	10.6084/m9.figshare.4903422	na	na	na
TARA_MED_MAG_00134	Delmont et al. (2018) Nature Microbiology	figshare	10.6084/m9.figshare.4903423	na	na	na
TARA_MED_MAG_00135	Delmont et al. (2018) Nature Microbiology	figshare	10.6084/m9.figshare.4903424	na	na	na
TARA_MED_MAG_00136	Delmont et al. (2018) Nature Microbiology	figshare	10.6084/m9.figshare.4903425	na	na	na
TARA_MED_MAG_00137	Delmont et al. (2018) Nature Microbiology	figshare	10.6084/m9.figshare.4903426	na	na	na
TARA_MED_MAG_00138	Delmont et al. (2018) Nature Microbiology	figshare	10.6084/m9.figshare.4903427	na	na	na
TARA_MED_MAG_00139	Delmont et al. (2018) Nature Microbiology	figshare	10.6084/m9.figshare.4903428	na	na	na
TARA_MED_MAG_00140	Delmont et al. (2018) Nature Microbiology	figshare	10.6084/m9.figshare.4903429	na	na	na
TARA_MED_MAG_00141	Delmont et al. (2018) Nature Microbiology	figshare	10.6084/m9.figshare.4903430	na	na	na
TARA_MED_MAG_00142	Delmont et al. (2018) Nature Microbiology	figshare	10.6084/m9.figshare.4903431	na	na	na
TARA_MED_MAG_00143	Delmont et al. (2018) Nature Microbiology	figshare	10.6084/m9.figshare.4903432	na	na	na
TARA_PON_MAG_00001	Delmont et al. (2018) Nature Microbiology	figshare	10.6084/m9.figshare.4903433	na	na	na
TARA_PON_MAG_00002	Delmont et al. (2018) Nature Microbiology	figshare	10.6084/m9.figshare.4903434	na	na	na
TARA_PON_MAG_00004	Delmont et al. (2018) Nature Microbiology	figshare	10.6084/m9.figshare.4903435	na	na	na
TARA_PON_MAG_00005	Delmont et al. (2018) Nature Microbiology	figshare	10.6084/m9.figshare.4903436	na	na	na
TARA_PON_MAG_00006	Delmont et al. (2018) Nature Microbiology	figshare	10.6084/m9.figshare.4903437	na	na	na
TARA_PON_MAG_00007	Delmont et al. (2018) Nature Microbiology	figshare	10.6084/m9.figshare.4903438	na	na	na
TARA_PON_MAG_00008	Delmont et al. (2018) Nature Microbiology	figshare	10.6084/m9.figshare.4903439	na	na	na
TARA_PON_MAG_00009	Delmont et al. (2018) Nature Microbiology	figshare	10.6084/m9.figshare.4903440	na	na	na
TARA_PON_MAG_00010	Delmont et al. (2018) Nature Microbiology	figshare	10.6084/m9.figshare.4903441	na	na	na
TARA_PON_MAG_00011	Delmont et al. (2018) Nature Microbiology	figshare	10.6084/m9.figshare.4903442	na	na	na
TARA_PON_MAG_00012	Delmont et al. (2018) Nature Microbiology	figshare	10.6084/m9.figshare.4903443	na	na	na
TARA_PON_MAG_00013	Delmont et al. (2018) Nature Microbiology	figshare	10.6084/m9.figshare.4903444	na	na	na
TARA_PON_MAG_00015	Delmont et al. (2018) Nature Microbiology	figshare	10.6084/m9.figshare.4903445	na	na	na
TARA_PON_MAG_00016	Delmont et al. (2018) Nature Microbiology	figshare	10.6084/m9.figshare.4903446	na	na	na
TARA_PON_MAG_00017	Delmont et al. (2018) Nature Microbiology	figshare	10.6084/m9.figshare.4903447	na	na	na
TARA_PON_MAG_00018	Delmont et al. (2018) Nature Microbiology	figshare	10.6084/m9.figshare.4903448	na	na	na
TARA_PON_MAG_00019	Delmont et al. (2018) Nature Microbiology	figshare	10.6084/m9.figshare.4903449	na	na	na
TARA_PON_MAG_00023	Delmont et al. (2018) Nature Microbiology	figshare	10.6084/m9.figshare.4903450	na	na	na
TARA_PON_MAG_00024	Delmont et al. (2018) Nature Microbiology	figshare	10.6084/m9.figshare.4903451	na	na	na
TARA_PON_MAG_00026	Delmont et al. (2018) Nature Microbiology	figshare	10.6084/m9.figshare.4903452	na	na	na
TARA_PON_MAG_00027	Delmont et al. (2018) Nature Microbiology	figshare	10.6084/m9.figshare.4903453	na	na	na
TARA_PON_MAG_00029	Delmont et al. (2018) Nature Microbiology	figshare	10.6084/m9.figshare.4903454	na	na	na
TARA_PON_MAG_00030	Delmont et al. (2018) Nature Microbiology	figshare	10.6084/m9.figshare.4903455	na	na	na
TARA_PON_MAG_00031	Delmont et al. (2018) Nature Microbiology	figshare	10.6084/m9.figshare.4903456	na	na	na
TARA_PON_MAG_00033	Delmont et al. (2018) Nature Microbiology	figshare	10.6084/m9.figshare.4903457	na	na	na
TARA_PON_MAG_00035	Delmont et al. (2018) Nature Microbiology	figshare	10.6084/m9.figshare.4903458	na	na	na
TARA_PON_MAG_00036	Delmont et al. (2018) Nature Microbiology	figshare	10.6084/m9.figshare.4903459	na	na	na
TARA_PON_MAG_00038	Delmont et al. (2018) Nature Microbiology	figshare	10.6084/m9.figshare.4903460	na	na	na
TARA_PON_MAG_00039	Delmont et al. (2018) Nature Microbiology	figshare	10.6084/m9.figshare.4903461	na	na	na
TARA_PON_MAG_00040	Delmont et al. (2018) Nature Microbiology	figshare	10.6084/m9.figshare.4903462	na	na	na
TARA_PON_MAG_00041	Delmont et al. (2018) Nature Microbiology	figshare	10.6084/m9.figshare.4903463	na	na	na
TARA_PON_MAG_00042	Delmont et al. (2018) Nature Microbiology	figshare	10.6084/m9.figshare.4903464	na	na	na
TARA_PON_MAG_00043	Delmont et al. (2018) Nature Microbiology	figshare	10.6084/m9.figshare.4903465	na	na	na
TARA_PON_MAG_00044	Delmont et al. (2018) Nature Microbiology	figshare	10.6084/m9.figshare.4903466	na	na	na
TARA_PON_MAG_00046	Delmont et al. (2018) Nature Microbiology	figshare	10.6084/m9.figshare.4903467	na	na	na
TARA_PON_MAG_00047	Delmont et al. (2018) Nature Microbiology	figshare	10.6084/m9.figshare.4903468	na	na	na
TARA_PON_MAG_00048	Delmont et al. (2018) Nature Microbiology	figshare	10.6084/m9.figshare.4903469	na	na	na
TARA_PON_MAG_00049	Delmont et al. (2018) Nature Microbiology	figshare	10.6084/m9.figshare.4903470	na	na	na
TARA_PON_MAG_00050	Delmont et al. (2018) Nature Microbiology	figshare	10.6084/m9.figshare.4903471	na	na	na
TARA_PON_MAG_00051	Delmont et al. (2018) Nature Microbiology	figshare	10.6084/m9.figshare.4903472	na	na	na
TARA_PON_MAG_00052	Delmont et al. (2018) Nature Microbiology	figshare	10.6084/m9.figshare.4903473	na	na	na
TARA_PON_MAG_00053	Delmont et al. (2018) Nature Microbiology	figshare	10.6084/m9.figshare.4903474	na	na	na
TARA_PON_MAG_00054	Delmont et al. (2018) Nature Microbiology	figshare	10.6084/m9.figshare.4903475	na	na	na
TARA_PON_MAG_00055	Delmont et al. (2018) Nature Microbiology	figshare	10.6084/m9.figshare.4903476	na	na	na
TARA_PON_MAG_00056	Delmont et al. (2018) Nature Microbiology	figshare	10.6084/m9.figshare.4903477	na	na	na
TARA_PON_MAG_00057	Delmont et al. (2018) Nature Microbiology	figshare	10.6084/m9.figshare.4903478	na	na	na
TARA_PON_MAG_00058	Delmont et al. (2018) Nature Microbiology	figshare	10.6084/m9.figshare.4903479	na	na	na
TARA_PON_MAG_00060	Delmont et al. (2018) Nature Microbiology	figshare	10.6084/m9.figshare.4903480	na	na	na
TARA_PON_MAG_00061	Delmont et al. (2018) Nature Microbiology	figshare	10.6084/m9.figshare.4903481	na	na	na
TARA_PON_MAG_00062	Delmont et al. (2018) Nature Microbiology	figshare	10.6084/m9.figshare.4903482	na	na	na
TARA_PON_MAG_00063	Delmont et al. (2018) Nature Microbiology	figshare	10.6084/m9.figshare.4903483	na	na	na
TARA_PON_MAG_00064	Delmont et al. (2018) Nature Microbiology	figshare	10.6084/m9.figshare.4903484	na	na	na
TARA_PON_MAG_00065	Delmont et al. (2018) Nature Microbiology	figshare	10.6084/m9.figshare.4903485	na	na	na
TARA_PON_MAG_00066	Delmont et al. (2018) Nature Microbiology	figshare	10.6084/m9.figshare.4903486	na	na	na
TARA_PON_MAG_00067	Delmont et al. (2018) Nature Microbiology	figshare	10.6084/m9.figshare.4903487	na	na	na
TARA_PON_MAG_00068	Delmont et al. (2018) Nature Microbiology	figshare	10.6084/m9.figshare.4903488	na	na	na
TARA_PON_MAG_00069	Delmont et al. (2018) Nature Microbiology	figshare	10.6084/m9.figshare.4903489	na	na	na
TARA_PON_MAG_00070	Delmont et al. (2018) Nature Microbiology	figshare	10.6084/m9.figshare.4903490	na	na	na
TARA_PON_MAG_00071	Delmont et al. (2018) Nature Microbiology	figshare	10.6084/m9.figshare.4903491	na	na	na
TARA_PON_MAG_00072	Delmont et al. (2018) Nature Microbiology	figshare	10.6084/m9.figshare.4903492	na	na	na
TARA_PON_MAG_00074	Delmont et al. (2018) Nature Microbiology	figshare	10.6084/m9.figshare.4903493	na	na	na
TARA_PON_MAG_00075	Delmont et al. (2018) Nature Microbiology	figshare	10.6084/m9.figshare.4903494	na	na	na
TARA_PON_MAG_00076	Delmont et al. (2018) Nature Microbiology	figshare	10.6084/m9.figshare.4903495	na	na	na
TARA_PON_MAG_00077	Delmont et al. (2018) Nature Microbiology	figshare	10.6084/m9.figshare.4903496	na	na	na
TARA_PON_MAG_00079	Delmont et al. (2018) Nature Microbiology	figshare	10.6084/m9.figshare.4903497	na	na	na
TARA_PON_MAG_00081	Delmont et al. (2018) Nature Microbiology	figshare	10.6084/m9.figshare.4903498	na	na	na
TARA_PON_MAG_00082	Delmont et al. (2018) Nature Microbiology	figshare	10.6084/m9.figshare.4903499	na	na	na
TARA_PON_MAG_00083	Delmont et al. (2018) Nature Microbiology	figshare	10.6084/m9.figshare.4903500	na	na	na
TARA_PON_MAG_00084	Delmont et al. (2018) Nature Microbiology	figshare	10.6084/m9.figshare.4903501	na	na	na
TARA_PON_MAG_00085	Delmont et al. (2018) Nature Microbiology	figshare	10.6084/m9.figshare.4903502	na	na	na
TARA_PON_MAG_00086	Delmont et al. (2018) Nature Microbiology	figshare	10.6084/m9.figshare.4903503	na	na	na
TARA_PON_MAG_00087	Delmont et al. (2018) Nature Microbiology	figshare	10.6084/m9.figshare.4903504	na	na	na
TARA_PON_MAG_00088	Delmont et al. (2018) Nature Microbiology	figshare	10.6084/m9.figshare.4903505	na	na	na
TARA_PSE_MAG_00001	Delmont et al. (2018) Nature Microbiology	figshare	10.6084/m9.figshare.4903506	na	na	na
TARA_PSE_MAG_00002	Delmont et al. (2018) Nature Microbiology	figshare	10.6084/m9.figshare.4903507	na	na	na
TARA_PSE_MAG_00004	Delmont et al. (2018) Nature Microbiology	figshare	10.6084/m9.figshare.4903508	na	na	na
TARA_PSE_MAG_00005	Delmont et al. (2018) Nature Microbiology	figshare	10.6084/m9.figshare.4903509	na	na	na
TARA_PSE_MAG_00006	Delmont et al. (2018) Nature Microbiology	figshare	10.6084/m9.figshare.4903510	na	na	na
TARA_PSE_MAG_00007	Delmont et al. (2018) Nature Microbiology	figshare	10.6084/m9.figshare.4903511	na	na	na
TARA_PSE_MAG_00009	Delmont et al. (2018) Nature Microbiology	figshare	10.6084/m9.figshare.4903512	na	na	na
TARA_PSE_MAG_00010	Delmont et al. (2018) Nature Microbiology	figshare	10.6084/m9.figshare.4903513	na	na	na
TARA_PSE_MAG_00011	Delmont et al. (2018) Nature Microbiology	figshare	10.6084/m9.figshare.4903514	na	na	na
TARA_PSE_MAG_00013	Delmont et al. (2018) Nature Microbiology	figshare	10.6084/m9.figshare.4903515	na	na	na
TARA_PSE_MAG_00014	Delmont et al. (2018) Nature Microbiology	figshare	10.6084/m9.figshare.4903516	na	na	na
TARA_PSE_MAG_00015	Delmont et al. (2018) Nature Microbiology	figshare	10.6084/m9.figshare.4903517	na	na	na
TARA_PSE_MAG_00016	Delmont et al. (2018) Nature Microbiology	figshare	10.6084/m9.figshare.4903518	na	na	na
TARA_PSE_MAG_00017	Delmont et al. (2018) Nature Microbiology	figshare	10.6084/m9.figshare.4903519	na	na	na
TARA_PSE_MAG_00018	Delmont et al. (2018) Nature Microbiology	figshare	10.6084/m9.figshare.4903520	na	na	na
TARA_PSE_MAG_00019	Delmont et al. (2018) Nature Microbiology	figshare	10.6084/m9.figshare.4903521	na	na	na
TARA_PSE_MAG_00020	Delmont et al. (2018) Nature Microbiology	figshare	10.6084/m9.figshare.4903522	na	na	na
TARA_PSE_MAG_00021	Delmont et al. (2018) Nature Microbiology	figshare	10.6084/m9.figshare.4903523	na	na	na
TARA_PSE_MAG_00022	Delmont et al. (2018) Nature Microbiology	figshare	10.6084/m9.figshare.4903524	na	na	na
TARA_PSE_MAG_00023	Delmont et al. (2018) Nature Microbiology	figshare	10.6084/m9.figshare.4903525	na	na	na
TARA_PSE_MAG_00024	Delmont et al. (2018) Nature Microbiology	figshare	10.6084/m9.figshare.4903526	na	na	na
TARA_PSE_MAG_00025	Delmont et al. (2018) Nature Microbiology	figshare	10.6084/m9.figshare.4903527	na	na	na
TARA_PSE_MAG_00026	Delmont et al. (2018) Nature Microbiology	figshare	10.6084/m9.figshare.4903528	na	na	na
TARA_PSE_MAG_00027	Delmont et al. (2018) Nature Microbiology	figshare	10.6084/m9.figshare.4903529	na	na	na
TARA_PSE_MAG_00028	Delmont et al. (2018) Nature Microbiology	figshare	10.6084/m9.figshare.4903530	na	na	na
TARA_PSE_MAG_00031	Delmont et al. (2018) Nature Microbiology	figshare	10.6084/m9.figshare.4903531	na	na	na
TARA_PSE_MAG_00032	Delmont et al. (2018) Nature Microbiology	figshare	10.6084/m9.figshare.4903532	na	na	na
TARA_PSE_MAG_00033	Delmont et al. (2018) Nature Microbiology	figshare	10.6084/m9.figshare.4903533	na	na	na
TARA_PSE_MAG_00035	Delmont et al. (2018) Nature Microbiology	figshare	10.6084/m9.figshare.4903534	na	na	na
TARA_PSE_MAG_00037	Delmont et al. (2018) Nature Microbiology	figshare	10.6084/m9.figshare.4903535	na	na	na
TARA_PSE_MAG_00038	Delmont et al. (2018) Nature Microbiology	figshare	10.6084/m9.figshare.4903536	na	na	na
TARA_PSE_MAG_00039	Delmont et al. (2018) Nature Microbiology	figshare	10.6084/m9.figshare.4903537	na	na	na
TARA_PSE_MAG_00041	Delmont et al. (2018) Nature Microbiology	figshare	10.6084/m9.figshare.4903538	na	na	na
TARA_PSE_MAG_00042	Delmont et al. (2018) Nature Microbiology	figshare	10.6084/m9.figshare.4903539	na	na	na
TARA_PSE_MAG_00043	Delmont et al. (2018) Nature Microbiology	figshare	10.6084/m9.figshare.4903540	na	na	na
TARA_PSE_MAG_00044	Delmont et al. (2018) Nature Microbiology	figshare	10.6084/m9.figshare.4903541	na	na	na
TARA_PSE_MAG_00045	Delmont et al. (2018) Nature Microbiology	figshare	10.6084/m9.figshare.4903542	na	na	na
TARA_PSE_MAG_00046	Delmont et al. (2018) Nature Microbiology	figshare	10.6084/m9.figshare.4903543	na	na	na
TARA_PSE_MAG_00047	Delmont et al. (2018) Nature Microbiology	figshare	10.6084/m9.figshare.4903544	na	na	na
TARA_PSE_MAG_00048	Delmont et al. (2018) Nature Microbiology	figshare	10.6084/m9.figshare.4903545	na	na	na
TARA_PSE_MAG_00050	Delmont et al. (2018) Nature Microbiology	figshare	10.6084/m9.figshare.4903546	na	na	na
TARA_PSE_MAG_00051	Delmont et al. (2018) Nature Microbiology	figshare	10.6084/m9.figshare.4903547	na	na	na
TARA_PSE_MAG_00052	Delmont et al. (2018) Nature Microbiology	figshare	10.6084/m9.figshare.4903548	na	na	na
TARA_PSE_MAG_00053	Delmont et al. (2018) Nature Microbiology	figshare	10.6084/m9.figshare.4903549	na	na	na
TARA_PSE_MAG_00054	Delmont et al. (2018) Nature Microbiology	figshare	10.6084/m9.figshare.4903550	na	na	na
TARA_PSE_MAG_00055	Delmont et al. (2018) Nature Microbiology	figshare	10.6084/m9.figshare.4903551	na	na	na
TARA_PSE_MAG_00056	Delmont et al. (2018) Nature Microbiology	figshare	10.6084/m9.figshare.4903552	na	na	na
TARA_PSE_MAG_00057	Delmont et al. (2018) Nature Microbiology	figshare	10.6084/m9.figshare.4903553	na	na	na
TARA_PSE_MAG_00058	Delmont et al. (2018) Nature Microbiology	figshare	10.6084/m9.figshare.4903554	na	na	na
TARA_PSE_MAG_00059	Delmont et al. (2018) Nature Microbiology	figshare	10.6084/m9.figshare.4903555	na	na	na
TARA_PSE_MAG_00061	Delmont et al. (2018) Nature Microbiology	figshare	10.6084/m9.figshare.4903556	na	na	na
TARA_PSE_MAG_00062	Delmont et al. (2018) Nature Microbiology	figshare	10.6084/m9.figshare.4903557	na	na	na
TARA_PSE_MAG_00063	Delmont et al. (2018) Nature Microbiology	figshare	10.6084/m9.figshare.4903558	na	na	na
TARA_PSE_MAG_00064	Delmont et al. (2018) Nature Microbiology	figshare	10.6084/m9.figshare.4903559	na	na	na
TARA_PSE_MAG_00065	Delmont et al. (2018) Nature Microbiology	figshare	10.6084/m9.figshare.4903560	na	na	na
TARA_PSE_MAG_00066	Delmont et al. (2018) Nature Microbiology	figshare	10.6084/m9.figshare.4903561	na	na	na
TARA_PSE_MAG_00068	Delmont et al. (2018) Nature Microbiology	figshare	10.6084/m9.figshare.4903562	na	na	na
TARA_PSE_MAG_00070	Delmont et al. (2018) Nature Microbiology	figshare	10.6084/m9.figshare.4903563	na	na	na
TARA_PSE_MAG_00071	Delmont et al. (2018) Nature Microbiology	figshare	10.6084/m9.figshare.4903564	na	na	na
TARA_PSE_MAG_00072	Delmont et al. (2018) Nature Microbiology	figshare	10.6084/m9.figshare.4903565	na	na	na
TARA_PSE_MAG_00073	Delmont et al. (2018) Nature Microbiology	figshare	10.6084/m9.figshare.4903566	na	na	na
TARA_PSE_MAG_00074	Delmont et al. (2018) Nature Microbiology	figshare	10.6084/m9.figshare.4903567	na	na	na
TARA_PSE_MAG_00075	Delmont et al. (2018) Nature Microbiology	figshare	10.6084/m9.figshare.4903568	na	na	na
TARA_PSE_MAG_00076	Delmont et al. (2018) Nature Microbiology	figshare	10.6084/m9.figshare.4903569	na	na	na
TARA_PSE_MAG_00077	Delmont et al. (2018) Nature Microbiology	figshare	10.6084/m9.figshare.4903570	na	na	na
TARA_PSE_MAG_00078	Delmont et al. (2018) Nature Microbiology	figshare	10.6084/m9.figshare.4903571	na	na	na
TARA_PSE_MAG_00079	Delmont et al. (2018) Nature Microbiology	figshare	10.6084/m9.figshare.4903572	na	na	na
TARA_PSE_MAG_00080	Delmont et al. (2018) Nature Microbiology	figshare	10.6084/m9.figshare.4903573	na	na	na
TARA_PSE_MAG_00081	Delmont et al. (2018) Nature Microbiology	figshare	10.6084/m9.figshare.4903574	na	na	na
TARA_PSE_MAG_00082	Delmont et al. (2018) Nature Microbiology	figshare	10.6084/m9.figshare.4903575	na	na	na
TARA_PSE_MAG_00083	Delmont et al. (2018) Nature Microbiology	figshare	10.6084/m9.figshare.4903576	na	na	na
TARA_PSE_MAG_00084	Delmont et al. (2018) Nature Microbiology	figshare	10.6084/m9.figshare.4903577	na	na	na
TARA_PSE_MAG_00085	Delmont et al. (2018) Nature Microbiology	figshare	10.6084/m9.figshare.4903578	na	na	na
TARA_PSE_MAG_00086	Delmont et al. (2018) Nature Microbiology	figshare	10.6084/m9.figshare.4903579	na	na	na
TARA_PSE_MAG_00087	Delmont et al. (2018) Nature Microbiology	figshare	10.6084/m9.figshare.4903580	na	na	na
TARA_PSE_MAG_00088	Delmont et al. (2018) Nature Microbiology	figshare	10.6084/m9.figshare.4903581	na	na	na
TARA_PSE_MAG_00089	Delmont et al. (2018) Nature Microbiology	figshare	10.6084/m9.figshare.4903582	na	na	na
TARA_PSE_MAG_00090	Delmont et al. (2018) Nature Microbiology	figshare	10.6084/m9.figshare.4903583	na	na	na
TARA_PSE_MAG_00091	Delmont et al. (2018) Nature Microbiology	figshare	10.6084/m9.figshare.4903584	na	na	na
TARA_PSE_MAG_00092	Delmont et al. (2018) Nature Microbiology	figshare	10.6084/m9.figshare.4903585	na	na	na
TARA_PSE_MAG_00093	Delmont et al. (2018) Nature Microbiology	figshare	10.6084/m9.figshare.4903586	na	na	na
TARA_PSE_MAG_00094	Delmont et al. (2018) Nature Microbiology	figshare	10.6084/m9.figshare.4903587	na	na	na
TARA_PSE_MAG_00095	Delmont et al. (2018) Nature Microbiology	figshare	10.6084/m9.figshare.4903588	na	na	na
TARA_PSE_MAG_00096	Delmont et al. (2018) Nature Microbiology	figshare	10.6084/m9.figshare.4903589	na	na	na
TARA_PSE_MAG_00097	Delmont et al. (2018) Nature Microbiology	figshare	10.6084/m9.figshare.4903590	na	na	na
TARA_PSE_MAG_00098	Delmont et al. (2018) Nature Microbiology	figshare	10.6084/m9.figshare.4903591	na	na	na
TARA_PSE_MAG_00099	Delmont et al. (2018) Nature Microbiology	figshare	10.6084/m9.figshare.4903592	na	na	na
TARA_PSE_MAG_00100	Delmont et al. (2018) Nature Microbiology	figshare	10.6084/m9.figshare.4903593	na	na	na
TARA_PSE_MAG_00101	Delmont et al. (2018) Nature Microbiology	figshare	10.6084/m9.figshare.4903594	na	na	na
TARA_PSE_MAG_00102	Delmont et al. (2018) Nature Microbiology	figshare	10.6084/m9.figshare.4903595	na	na	na
TARA_PSE_MAG_00103	Delmont et al. (2018) Nature Microbiology	figshare	10.6084/m9.figshare.4903596	na	na	na
TARA_PSE_MAG_00104	Delmont et al. (2018) Nature Microbiology	figshare	10.6084/m9.figshare.4903597	na	na	na
TARA_PSE_MAG_00105	Delmont et al. (2018) Nature Microbiology	figshare	10.6084/m9.figshare.4903598	na	na	na
TARA_PSE_MAG_00106	Delmont et al. (2018) Nature Microbiology	figshare	10.6084/m9.figshare.4903599	na	na	na
TARA_PSE_MAG_00107	Delmont et al. (2018) Nature Microbiology	figshare	10.6084/m9.figshare.4903600	na	na	na
TARA_PSE_MAG_00109	Delmont et al. (2018) Nature Microbiology	figshare	10.6084/m9.figshare.4903601	na	na	na
TARA_PSE_MAG_00110	Delmont et al. (2018) Nature Microbiology	figshare	10.6084/m9.figshare.4903602	na	na	na
TARA_PSE_MAG_00111	Delmont et al. (2018) Nature Microbiology	figshare	10.6084/m9.figshare.4903603	na	na	na
TARA_PSE_MAG_00112	Delmont et al. (2018) Nature Microbiology	figshare	10.6084/m9.figshare.4903604	na	na	na
TARA_PSE_MAG_00114	Delmont et al. (2018) Nature Microbiology	figshare	10.6084/m9.figshare.4903605	na	na	na
TARA_PSE_MAG_00115	Delmont et al. (2018) Nature Microbiology	figshare	10.6084/m9.figshare.4903606	na	na	na
TARA_PSE_MAG_00116	Delmont et al. (2018) Nature Microbiology	figshare	10.6084/m9.figshare.4903607	na	na	na
TARA_PSE_MAG_00118	Delmont et al. (2018) Nature Microbiology	figshare	10.6084/m9.figshare.4903608	na	na	na
TARA_PSE_MAG_00119	Delmont et al. (2018) Nature Microbiology	figshare	10.6084/m9.figshare.4903609	na	na	na
TARA_PSE_MAG_00120	Delmont et al. (2018) Nature Microbiology	figshare	10.6084/m9.figshare.4903610	na	na	na
TARA_PSE_MAG_00121	Delmont et al. (2018) Nature Microbiology	figshare	10.6084/m9.figshare.4903611	na	na	na
TARA_PSE_MAG_00122	Delmont et al. (2018) Nature Microbiology	figshare	10.6084/m9.figshare.4903612	na	na	na
TARA_PSE_MAG_00123	Delmont et al. (2018) Nature Microbiology	figshare	10.6084/m9.figshare.4903613	na	na	na
TARA_PSE_MAG_00124	Delmont et al. (2018) Nature Microbiology	figshare	10.6084/m9.figshare.4903614	na	na	na
TARA_PSE_MAG_00125	Delmont et al. (2018) Nature Microbiology	figshare	10.6084/m9.figshare.4903615	na	na	na
TARA_PSE_MAG_00126	Delmont et al. (2018) Nature Microbiology	figshare	10.6084/m9.figshare.4903616	na	na	na
TARA_PSE_MAG_00127	Delmont et al. (2018) Nature Microbiology	figshare	10.6084/m9.figshare.4903617	na	na	na
TARA_PSE_MAG_00128	Delmont et al. (2018) Nature Microbiology	figshare	10.6084/m9.figshare.4903618	na	na	na
TARA_PSE_MAG_00129	Delmont et al. (2018) Nature Microbiology	figshare	10.6084/m9.figshare.4903619	na	na	na
TARA_PSE_MAG_00130	Delmont et al. (2018) Nature Microbiology	figshare	10.6084/m9.figshare.4903620	na	na	na
TARA_PSE_MAG_00131	Delmont et al. (2018) Nature Microbiology	figshare	10.6084/m9.figshare.4903621	na	na	na
TARA_PSE_MAG_00132	Delmont et al. (2018) Nature Microbiology	figshare	10.6084/m9.figshare.4903622	na	na	na
TARA_PSE_MAG_00133	Delmont et al. (2018) Nature Microbiology	figshare	10.6084/m9.figshare.4903623	na	na	na
TARA_PSE_MAG_00136	Delmont et al. (2018) Nature Microbiology	figshare	10.6084/m9.figshare.4903624	na	na	na
TARA_PSE_MAG_00137	Delmont et al. (2018) Nature Microbiology	figshare	10.6084/m9.figshare.4903625	na	na	na
TARA_PSE_MAG_00138	Delmont et al. (2018) Nature Microbiology	figshare	10.6084/m9.figshare.4903626	na	na	na
TARA_PSE_MAG_00139	Delmont et al. (2018) Nature Microbiology	figshare	10.6084/m9.figshare.4903627	na	na	na
TARA_PSE_MAG_00140	Delmont et al. (2018) Nature Microbiology	figshare	10.6084/m9.figshare.4903628	na	na	na
TARA_PSE_MAG_00141	Delmont et al. (2018) Nature Microbiology	figshare	10.6084/m9.figshare.4903629	na	na	na
TARA_PSE_MAG_00142	Delmont et al. (2018) Nature Microbiology	figshare	10.6084/m9.figshare.4903630	na	na	na
TARA_PSE_MAG_00144	Delmont et al. (2018) Nature Microbiology	figshare	10.6084/m9.figshare.4903631	na	na	na
TARA_PSE_MAG_00145	Delmont et al. (2018) Nature Microbiology	figshare	10.6084/m9.figshare.4903632	na	na	na
TARA_PSE_MAG_00147	Delmont et al. (2018) Nature Microbiology	figshare	10.6084/m9.figshare.4903633	na	na	na
TARA_PSE_MAG_00148	Delmont et al. (2018) Nature Microbiology	figshare	10.6084/m9.figshare.4903634	na	na	na
TARA_PSE_MAG_00150	Delmont et al. (2018) Nature Microbiology	figshare	10.6084/m9.figshare.4903635	na	na	na
TARA_PSW_MAG_00002	Delmont et al. (2018) Nature Microbiology	figshare	10.6084/m9.figshare.4903636	na	na	na
TARA_PSW_MAG_00003	Delmont et al. (2018) Nature Microbiology	figshare	10.6084/m9.figshare.4903637	na	na	na
TARA_PSW_MAG_00004	Delmont et al. (2018) Nature Microbiology	figshare	10.6084/m9.figshare.4903638	na	na	na
TARA_PSW_MAG_00006	Delmont et al. (2018) Nature Microbiology	figshare	10.6084/m9.figshare.4903639	na	na	na
TARA_PSW_MAG_00007	Delmont et al. (2018) Nature Microbiology	figshare	10.6084/m9.figshare.4903640	na	na	na
TARA_PSW_MAG_00010	Delmont et al. (2018) Nature Microbiology	figshare	10.6084/m9.figshare.4903641	na	na	na
TARA_PSW_MAG_00011	Delmont et al. (2018) Nature Microbiology	figshare	10.6084/m9.figshare.4903642	na	na	na
TARA_PSW_MAG_00012	Delmont et al. (2018) Nature Microbiology	figshare	10.6084/m9.figshare.4903643	na	na	na
TARA_PSW_MAG_00013	Delmont et al. (2018) Nature Microbiology	figshare	10.6084/m9.figshare.4903644	na	na	na
TARA_PSW_MAG_00014	Delmont et al. (2018) Nature Microbiology	figshare	10.6084/m9.figshare.4903645	na	na	na
TARA_PSW_MAG_00016	Delmont et al. (2018) Nature Microbiology	figshare	10.6084/m9.figshare.4903646	na	na	na
TARA_PSW_MAG_00017	Delmont et al. (2018) Nature Microbiology	figshare	10.6084/m9.figshare.4903647	na	na	na
TARA_PSW_MAG_00018	Delmont et al. (2018) Nature Microbiology	figshare	10.6084/m9.figshare.4903648	na	na	na
TARA_PSW_MAG_00019	Delmont et al. (2018) Nature Microbiology	figshare	10.6084/m9.figshare.4903649	na	na	na
TARA_PSW_MAG_00020	Delmont et al. (2018) Nature Microbiology	figshare	10.6084/m9.figshare.4903650	na	na	na
TARA_PSW_MAG_00021	Delmont et al. (2018) Nature Microbiology	figshare	10.6084/m9.figshare.4903651	na	na	na
TARA_PSW_MAG_00022	Delmont et al. (2018) Nature Microbiology	figshare	10.6084/m9.figshare.4903652	na	na	na
TARA_PSW_MAG_00023	Delmont et al. (2018) Nature Microbiology	figshare	10.6084/m9.figshare.4903653	na	na	na
TARA_PSW_MAG_00024	Delmont et al. (2018) Nature Microbiology	figshare	10.6084/m9.figshare.4903654	na	na	na
TARA_PSW_MAG_00026	Delmont et al. (2018) Nature Microbiology	figshare	10.6084/m9.figshare.4903655	na	na	na
TARA_PSW_MAG_00027	Delmont et al. (2018) Nature Microbiology	figshare	10.6084/m9.figshare.4903656	na	na	na
TARA_PSW_MAG_00028	Delmont et al. (2018) Nature Microbiology	figshare	10.6084/m9.figshare.4903657	na	na	na
TARA_PSW_MAG_00029	Delmont et al. (2018) Nature Microbiology	figshare	10.6084/m9.figshare.4903658	na	na	na
TARA_PSW_MAG_00030	Delmont et al. (2018) Nature Microbiology	figshare	10.6084/m9.figshare.4903659	na	na	na
TARA_PSW_MAG_00032	Delmont et al. (2018) Nature Microbiology	figshare	10.6084/m9.figshare.4903660	na	na	na
TARA_PSW_MAG_00033	Delmont et al. (2018) Nature Microbiology	figshare	10.6084/m9.figshare.4903661	na	na	na
TARA_PSW_MAG_00036	Delmont et al. (2018) Nature Microbiology	figshare	10.6084/m9.figshare.4903662	na	na	na
TARA_PSW_MAG_00037	Delmont et al. (2018) Nature Microbiology	figshare	10.6084/m9.figshare.4903663	na	na	na
TARA_PSW_MAG_00038	Delmont et al. (2018) Nature Microbiology	figshare	10.6084/m9.figshare.4903664	na	na	na
TARA_PSW_MAG_00039	Delmont et al. (2018) Nature Microbiology	figshare	10.6084/m9.figshare.4903665	na	na	na
TARA_PSW_MAG_00040	Delmont et al. (2018) Nature Microbiology	figshare	10.6084/m9.figshare.4903666	na	na	na
TARA_PSW_MAG_00041	Delmont et al. (2018) Nature Microbiology	figshare	10.6084/m9.figshare.4903667	na	na	na
TARA_PSW_MAG_00042	Delmont et al. (2018) Nature Microbiology	figshare	10.6084/m9.figshare.4903668	na	na	na
TARA_PSW_MAG_00043	Delmont et al. (2018) Nature Microbiology	figshare	10.6084/m9.figshare.4903669	na	na	na
TARA_PSW_MAG_00044	Delmont et al. (2018) Nature Microbiology	figshare	10.6084/m9.figshare.4903670	na	na	na
TARA_PSW_MAG_00045	Delmont et al. (2018) Nature Microbiology	figshare	10.6084/m9.figshare.4903671	na	na	na
TARA_PSW_MAG_00046	Delmont et al. (2018) Nature Microbiology	figshare	10.6084/m9.figshare.4903672	na	na	na
TARA_PSW_MAG_00047	Delmont et al. (2018) Nature Microbiology	figshare	10.6084/m9.figshare.4903673	na	na	na
TARA_PSW_MAG_00048	Delmont et al. (2018) Nature Microbiology	figshare	10.6084/m9.figshare.4903674	na	na	na
TARA_PSW_MAG_00049	Delmont et al. (2018) Nature Microbiology	figshare	10.6084/m9.figshare.4903675	na	na	na
TARA_PSW_MAG_00053	Delmont et al. (2018) Nature Microbiology	figshare	10.6084/m9.figshare.4903676	na	na	na
TARA_PSW_MAG_00054	Delmont et al. (2018) Nature Microbiology	figshare	10.6084/m9.figshare.4903677	na	na	na
TARA_PSW_MAG_00055	Delmont et al. (2018) Nature Microbiology	figshare	10.6084/m9.figshare.4903678	na	na	na
TARA_PSW_MAG_00056	Delmont et al. (2018) Nature Microbiology	figshare	10.6084/m9.figshare.4903679	na	na	na
TARA_PSW_MAG_00057	Delmont et al. (2018) Nature Microbiology	figshare	10.6084/m9.figshare.4903680	na	na	na
TARA_PSW_MAG_00058	Delmont et al. (2018) Nature Microbiology	figshare	10.6084/m9.figshare.4903681	na	na	na
TARA_PSW_MAG_00059	Delmont et al. (2018) Nature Microbiology	figshare	10.6084/m9.figshare.4903682	na	na	na
TARA_PSW_MAG_00060	Delmont et al. (2018) Nature Microbiology	figshare	10.6084/m9.figshare.4903683	na	na	na
TARA_PSW_MAG_00061	Delmont et al. (2018) Nature Microbiology	figshare	10.6084/m9.figshare.4903684	na	na	na
TARA_PSW_MAG_00062	Delmont et al. (2018) Nature Microbiology	figshare	10.6084/m9.figshare.4903685	na	na	na
TARA_PSW_MAG_00064	Delmont et al. (2018) Nature Microbiology	figshare	10.6084/m9.figshare.4903686	na	na	na
TARA_PSW_MAG_00065	Delmont et al. (2018) Nature Microbiology	figshare	10.6084/m9.figshare.4903687	na	na	na
TARA_PSW_MAG_00066	Delmont et al. (2018) Nature Microbiology	figshare	10.6084/m9.figshare.4903688	na	na	na
TARA_PSW_MAG_00067	Delmont et al. (2018) Nature Microbiology	figshare	10.6084/m9.figshare.4903689	na	na	na
TARA_PSW_MAG_00068	Delmont et al. (2018) Nature Microbiology	figshare	10.6084/m9.figshare.4903690	na	na	na
TARA_PSW_MAG_00069	Delmont et al. (2018) Nature Microbiology	figshare	10.6084/m9.figshare.4903691	na	na	na
TARA_PSW_MAG_00070	Delmont et al. (2018) Nature Microbiology	figshare	10.6084/m9.figshare.4903692	na	na	na
TARA_PSW_MAG_00071	Delmont et al. (2018) Nature Microbiology	figshare	10.6084/m9.figshare.4903693	na	na	na
TARA_PSW_MAG_00072	Delmont et al. (2018) Nature Microbiology	figshare	10.6084/m9.figshare.4903694	na	na	na
TARA_PSW_MAG_00073	Delmont et al. (2018) Nature Microbiology	figshare	10.6084/m9.figshare.4903695	na	na	na
TARA_PSW_MAG_00074	Delmont et al. (2018) Nature Microbiology	figshare	10.6084/m9.figshare.4903696	na	na	na
TARA_PSW_MAG_00075	Delmont et al. (2018) Nature Microbiology	figshare	10.6084/m9.figshare.4903697	na	na	na
TARA_PSW_MAG_00076	Delmont et al. (2018) Nature Microbiology	figshare	10.6084/m9.figshare.4903698	na	na	na
TARA_PSW_MAG_00077	Delmont et al. (2018) Nature Microbiology	figshare	10.6084/m9.figshare.4903699	na	na	na
TARA_PSW_MAG_00078	Delmont et al. (2018) Nature Microbiology	figshare	10.6084/m9.figshare.4903700	na	na	na
TARA_PSW_MAG_00080	Delmont et al. (2018) Nature Microbiology	figshare	10.6084/m9.figshare.4903701	na	na	na
TARA_PSW_MAG_00081	Delmont et al. (2018) Nature Microbiology	figshare	10.6084/m9.figshare.4903702	na	na	na
TARA_PSW_MAG_00082	Delmont et al. (2018) Nature Microbiology	figshare	10.6084/m9.figshare.4903703	na	na	na
TARA_PSW_MAG_00083	Delmont et al. (2018) Nature Microbiology	figshare	10.6084/m9.figshare.4903704	na	na	na
TARA_PSW_MAG_00084	Delmont et al. (2018) Nature Microbiology	figshare	10.6084/m9.figshare.4903705	na	na	na
TARA_PSW_MAG_00085	Delmont et al. (2018) Nature Microbiology	figshare	10.6084/m9.figshare.4903706	na	na	na
TARA_PSW_MAG_00086	Delmont et al. (2018) Nature Microbiology	figshare	10.6084/m9.figshare.4903707	na	na	na
TARA_PSW_MAG_00087	Delmont et al. (2018) Nature Microbiology	figshare	10.6084/m9.figshare.4903708	na	na	na
TARA_PSW_MAG_00088	Delmont et al. (2018) Nature Microbiology	figshare	10.6084/m9.figshare.4903709	na	na	na
TARA_PSW_MAG_00089	Delmont et al. (2018) Nature Microbiology	figshare	10.6084/m9.figshare.4903710	na	na	na
TARA_PSW_MAG_00090	Delmont et al. (2018) Nature Microbiology	figshare	10.6084/m9.figshare.4903711	na	na	na
TARA_PSW_MAG_00091	Delmont et al. (2018) Nature Microbiology	figshare	10.6084/m9.figshare.4903712	na	na	na
TARA_PSW_MAG_00092	Delmont et al. (2018) Nature Microbiology	figshare	10.6084/m9.figshare.4903713	na	na	na
TARA_PSW_MAG_00093	Delmont et al. (2018) Nature Microbiology	figshare	10.6084/m9.figshare.4903714	na	na	na
TARA_PSW_MAG_00094	Delmont et al. (2018) Nature Microbiology	figshare	10.6084/m9.figshare.4903715	na	na	na
TARA_PSW_MAG_00096	Delmont et al. (2018) Nature Microbiology	figshare	10.6084/m9.figshare.4903716	na	na	na
TARA_PSW_MAG_00097	Delmont et al. (2018) Nature Microbiology	figshare	10.6084/m9.figshare.4903717	na	na	na
TARA_PSW_MAG_00098	Delmont et al. (2018) Nature Microbiology	figshare	10.6084/m9.figshare.4903718	na	na	na
TARA_PSW_MAG_00100	Delmont et al. (2018) Nature Microbiology	figshare	10.6084/m9.figshare.4903719	na	na	na
TARA_PSW_MAG_00101	Delmont et al. (2018) Nature Microbiology	figshare	10.6084/m9.figshare.4903720	na	na	na
TARA_PSW_MAG_00102	Delmont et al. (2018) Nature Microbiology	figshare	10.6084/m9.figshare.4903721	na	na	na
TARA_PSW_MAG_00103	Delmont et al. (2018) Nature Microbiology	figshare	10.6084/m9.figshare.4903722	na	na	na
TARA_PSW_MAG_00104	Delmont et al. (2018) Nature Microbiology	figshare	10.6084/m9.figshare.4903723	na	na	na
TARA_PSW_MAG_00105	Delmont et al. (2018) Nature Microbiology	figshare	10.6084/m9.figshare.4903724	na	na	na
TARA_PSW_MAG_00106	Delmont et al. (2018) Nature Microbiology	figshare	10.6084/m9.figshare.4903725	na	na	na
TARA_PSW_MAG_00107	Delmont et al. (2018) Nature Microbiology	figshare	10.6084/m9.figshare.4903726	na	na	na
TARA_PSW_MAG_00108	Delmont et al. (2018) Nature Microbiology	figshare	10.6084/m9.figshare.4903727	na	na	na
TARA_PSW_MAG_00109	Delmont et al. (2018) Nature Microbiology	figshare	10.6084/m9.figshare.4903728	na	na	na
TARA_PSW_MAG_00110	Delmont et al. (2018) Nature Microbiology	figshare	10.6084/m9.figshare.4903729	na	na	na
TARA_PSW_MAG_00112	Delmont et al. (2018) Nature Microbiology	figshare	10.6084/m9.figshare.4903730	na	na	na
TARA_PSW_MAG_00113	Delmont et al. (2018) Nature Microbiology	figshare	10.6084/m9.figshare.4903731	na	na	na
TARA_PSW_MAG_00114	Delmont et al. (2018) Nature Microbiology	figshare	10.6084/m9.figshare.4903732	na	na	na
TARA_PSW_MAG_00115	Delmont et al. (2018) Nature Microbiology	figshare	10.6084/m9.figshare.4903733	na	na	na
TARA_PSW_MAG_00116	Delmont et al. (2018) Nature Microbiology	figshare	10.6084/m9.figshare.4903734	na	na	na
TARA_PSW_MAG_00117	Delmont et al. (2018) Nature Microbiology	figshare	10.6084/m9.figshare.4903735	na	na	na
TARA_PSW_MAG_00118	Delmont et al. (2018) Nature Microbiology	figshare	10.6084/m9.figshare.4903736	na	na	na
TARA_PSW_MAG_00120	Delmont et al. (2018) Nature Microbiology	figshare	10.6084/m9.figshare.4903737	na	na	na
TARA_PSW_MAG_00121	Delmont et al. (2018) Nature Microbiology	figshare	10.6084/m9.figshare.4903738	na	na	na
TARA_PSW_MAG_00122	Delmont et al. (2018) Nature Microbiology	figshare	10.6084/m9.figshare.4903739	na	na	na
TARA_PSW_MAG_00123	Delmont et al. (2018) Nature Microbiology	figshare	10.6084/m9.figshare.4903740	na	na	na
TARA_PSW_MAG_00124	Delmont et al. (2018) Nature Microbiology	figshare	10.6084/m9.figshare.4903741	na	na	na
TARA_PSW_MAG_00125	Delmont et al. (2018) Nature Microbiology	figshare	10.6084/m9.figshare.4903742	na	na	na
TARA_PSW_MAG_00126	Delmont et al. (2018) Nature Microbiology	figshare	10.6084/m9.figshare.4903743	na	na	na
TARA_PSW_MAG_00127	Delmont et al. (2018) Nature Microbiology	figshare	10.6084/m9.figshare.4903744	na	na	na
TARA_PSW_MAG_00128	Delmont et al. (2018) Nature Microbiology	figshare	10.6084/m9.figshare.4903745	na	na	na
TARA_PSW_MAG_00129	Delmont et al. (2018) Nature Microbiology	figshare	10.6084/m9.figshare.4903746	na	na	na
TARA_PSW_MAG_00130	Delmont et al. (2018) Nature Microbiology	figshare	10.6084/m9.figshare.4903747	na	na	na
TARA_PSW_MAG_00131	Delmont et al. (2018) Nature Microbiology	figshare	10.6084/m9.figshare.4903748	na	na	na
TARA_PSW_MAG_00132	Delmont et al. (2018) Nature Microbiology	figshare	10.6084/m9.figshare.4903749	na	na	na
TARA_PSW_MAG_00133	Delmont et al. (2018) Nature Microbiology	figshare	10.6084/m9.figshare.4903750	na	na	na
TARA_PSW_MAG_00134	Delmont et al. (2018) Nature Microbiology	figshare	10.6084/m9.figshare.4903751	na	na	na
TARA_PSW_MAG_00135	Delmont et al. (2018) Nature Microbiology	figshare	10.6084/m9.figshare.4903752	na	na	na
TARA_PSW_MAG_00136	Delmont et al. (2018) Nature Microbiology	figshare	10.6084/m9.figshare.4903753	na	na	na
TARA_RED_MAG_00001	Delmont et al. (2018) Nature Microbiology	figshare	10.6084/m9.figshare.4903754	na	na	na
TARA_RED_MAG_00002	Delmont et al. (2018) Nature Microbiology	figshare	10.6084/m9.figshare.4903755	na	na	na
TARA_RED_MAG_00003	Delmont et al. (2018) Nature Microbiology	figshare	10.6084/m9.figshare.4903756	na	na	na
TARA_RED_MAG_00004	Delmont et al. (2018) Nature Microbiology	figshare	10.6084/m9.figshare.4903757	na	na	na
TARA_RED_MAG_00005	Delmont et al. (2018) Nature Microbiology	figshare	10.6084/m9.figshare.4903758	na	na	na
TARA_RED_MAG_00006	Delmont et al. (2018) Nature Microbiology	figshare	10.6084/m9.figshare.4903759	na	na	na
TARA_RED_MAG_00007	Delmont et al. (2018) Nature Microbiology	figshare	10.6084/m9.figshare.4903760	na	na	na
TARA_RED_MAG_00008	Delmont et al. (2018) Nature Microbiology	figshare	10.6084/m9.figshare.4903761	na	na	na
TARA_RED_MAG_00009	Delmont et al. (2018) Nature Microbiology	figshare	10.6084/m9.figshare.4903762	na	na	na
TARA_RED_MAG_00010	Delmont et al. (2018) Nature Microbiology	figshare	10.6084/m9.figshare.4903763	na	na	na
TARA_RED_MAG_00011	Delmont et al. (2018) Nature Microbiology	figshare	10.6084/m9.figshare.4903764	na	na	na
TARA_RED_MAG_00014	Delmont et al. (2018) Nature Microbiology	figshare	10.6084/m9.figshare.4903765	na	na	na
TARA_RED_MAG_00015	Delmont et al. (2018) Nature Microbiology	figshare	10.6084/m9.figshare.4903766	na	na	na
TARA_RED_MAG_00016	Delmont et al. (2018) Nature Microbiology	figshare	10.6084/m9.figshare.4903767	na	na	na
TARA_RED_MAG_00018	Delmont et al. (2018) Nature Microbiology	figshare	10.6084/m9.figshare.4903768	na	na	na
TARA_RED_MAG_00019	Delmont et al. (2018) Nature Microbiology	figshare	10.6084/m9.figshare.4903769	na	na	na
TARA_RED_MAG_00020	Delmont et al. (2018) Nature Microbiology	figshare	10.6084/m9.figshare.4903770	na	na	na
TARA_RED_MAG_00021	Delmont et al. (2018) Nature Microbiology	figshare	10.6084/m9.figshare.4903771	na	na	na
TARA_RED_MAG_00022	Delmont et al. (2018) Nature Microbiology	figshare	10.6084/m9.figshare.4903772	na	na	na
TARA_RED_MAG_00023	Delmont et al. (2018) Nature Microbiology	figshare	10.6084/m9.figshare.4903773	na	na	na
TARA_RED_MAG_00024	Delmont et al. (2018) Nature Microbiology	figshare	10.6084/m9.figshare.4903774	na	na	na
TARA_RED_MAG_00025	Delmont et al. (2018) Nature Microbiology	figshare	10.6084/m9.figshare.4903775	na	na	na
TARA_RED_MAG_00026	Delmont et al. (2018) Nature Microbiology	figshare	10.6084/m9.figshare.4903776	na	na	na
TARA_RED_MAG_00028	Delmont et al. (2018) Nature Microbiology	figshare	10.6084/m9.figshare.4903777	na	na	na
TARA_RED_MAG_00029	Delmont et al. (2018) Nature Microbiology	figshare	10.6084/m9.figshare.4903778	na	na	na
TARA_RED_MAG_00030	Delmont et al. (2018) Nature Microbiology	figshare	10.6084/m9.figshare.4903779	na	na	na
TARA_RED_MAG_00031	Delmont et al. (2018) Nature Microbiology	figshare	10.6084/m9.figshare.4903780	na	na	na
TARA_RED_MAG_00032	Delmont et al. (2018) Nature Microbiology	figshare	10.6084/m9.figshare.4903781	na	na	na
TARA_RED_MAG_00033	Delmont et al. (2018) Nature Microbiology	figshare	10.6084/m9.figshare.4903782	na	na	na
TARA_RED_MAG_00034	Delmont et al. (2018) Nature Microbiology	figshare	10.6084/m9.figshare.4903783	na	na	na
TARA_RED_MAG_00035	Delmont et al. (2018) Nature Microbiology	figshare	10.6084/m9.figshare.4903784	na	na	na
TARA_RED_MAG_00036	Delmont et al. (2018) Nature Microbiology	figshare	10.6084/m9.figshare.4903785	na	na	na
TARA_RED_MAG_00037	Delmont et al. (2018) Nature Microbiology	figshare	10.6084/m9.figshare.4903786	na	na	na
TARA_RED_MAG_00038	Delmont et al. (2018) Nature Microbiology	figshare	10.6084/m9.figshare.4903787	na	na	na
TARA_RED_MAG_00039	Delmont et al. (2018) Nature Microbiology	figshare	10.6084/m9.figshare.4903788	na	na	na
TARA_RED_MAG_00040	Delmont et al. (2018) Nature Microbiology	figshare	10.6084/m9.figshare.4903789	na	na	na
TARA_RED_MAG_00041	Delmont et al. (2018) Nature Microbiology	figshare	10.6084/m9.figshare.4903790	na	na	na
TARA_RED_MAG_00042	Delmont et al. (2018) Nature Microbiology	figshare	10.6084/m9.figshare.4903791	na	na	na
TARA_RED_MAG_00043	Delmont et al. (2018) Nature Microbiology	figshare	10.6084/m9.figshare.4903792	na	na	na
TARA_RED_MAG_00044	Delmont et al. (2018) Nature Microbiology	figshare	10.6084/m9.figshare.4903793	na	na	na
TARA_RED_MAG_00045	Delmont et al. (2018) Nature Microbiology	figshare	10.6084/m9.figshare.4903794	na	na	na
TARA_RED_MAG_00046	Delmont et al. (2018) Nature Microbiology	figshare	10.6084/m9.figshare.4903795	na	na	na
TARA_RED_MAG_00047	Delmont et al. (2018) Nature Microbiology	figshare	10.6084/m9.figshare.4903796	na	na	na
TARA_RED_MAG_00048	Delmont et al. (2018) Nature Microbiology	figshare	10.6084/m9.figshare.4903797	na	na	na
TARA_RED_MAG_00049	Delmont et al. (2018) Nature Microbiology	figshare	10.6084/m9.figshare.4903798	na	na	na
TARA_RED_MAG_00050	Delmont et al. (2018) Nature Microbiology	figshare	10.6084/m9.figshare.4903799	na	na	na
TARA_RED_MAG_00051	Delmont et al. (2018) Nature Microbiology	figshare	10.6084/m9.figshare.4903800	na	na	na
TARA_RED_MAG_00052	Delmont et al. (2018) Nature Microbiology	figshare	10.6084/m9.figshare.4903801	na	na	na
TARA_RED_MAG_00053	Delmont et al. (2018) Nature Microbiology	figshare	10.6084/m9.figshare.4903802	na	na	na
TARA_RED_MAG_00054	Delmont et al. (2018) Nature Microbiology	figshare	10.6084/m9.figshare.4903803	na	na	na
TARA_RED_MAG_00055	Delmont et al. (2018) Nature Microbiology	figshare	10.6084/m9.figshare.4903804	na	na	na
TARA_RED_MAG_00057	Delmont et al. (2018) Nature Microbiology	figshare	10.6084/m9.figshare.4903805	na	na	na
TARA_RED_MAG_00059	Delmont et al. (2018) Nature Microbiology	figshare	10.6084/m9.figshare.4903806	na	na	na
TARA_RED_MAG_00060	Delmont et al. (2018) Nature Microbiology	figshare	10.6084/m9.figshare.4903807	na	na	na
TARA_RED_MAG_00061	Delmont et al. (2018) Nature Microbiology	figshare	10.6084/m9.figshare.4903808	na	na	na
TARA_RED_MAG_00062	Delmont et al. (2018) Nature Microbiology	figshare	10.6084/m9.figshare.4903809	na	na	na
TARA_RED_MAG_00063	Delmont et al. (2018) Nature Microbiology	figshare	10.6084/m9.figshare.4903810	na	na	na
TARA_RED_MAG_00064	Delmont et al. (2018) Nature Microbiology	figshare	10.6084/m9.figshare.4903811	na	na	na
TARA_RED_MAG_00065	Delmont et al. (2018) Nature Microbiology	figshare	10.6084/m9.figshare.4903812	na	na	na
TARA_RED_MAG_00066	Delmont et al. (2018) Nature Microbiology	figshare	10.6084/m9.figshare.4903813	na	na	na
TARA_RED_MAG_00067	Delmont et al. (2018) Nature Microbiology	figshare	10.6084/m9.figshare.4903814	na	na	na
TARA_RED_MAG_00068	Delmont et al. (2018) Nature Microbiology	figshare	10.6084/m9.figshare.4903815	na	na	na
TARA_RED_MAG_00069	Delmont et al. (2018) Nature Microbiology	figshare	10.6084/m9.figshare.4903816	na	na	na
TARA_RED_MAG_00070	Delmont et al. (2018) Nature Microbiology	figshare	10.6084/m9.figshare.4903817	na	na	na
TARA_RED_MAG_00071	Delmont et al. (2018) Nature Microbiology	figshare	10.6084/m9.figshare.4903818	na	na	na
TARA_RED_MAG_00072	Delmont et al. (2018) Nature Microbiology	figshare	10.6084/m9.figshare.4903819	na	na	na
TARA_RED_MAG_00074	Delmont et al. (2018) Nature Microbiology	figshare	10.6084/m9.figshare.4903820	na	na	na
TARA_RED_MAG_00075	Delmont et al. (2018) Nature Microbiology	figshare	10.6084/m9.figshare.4903821	na	na	na
TARA_RED_MAG_00076	Delmont et al. (2018) Nature Microbiology	figshare	10.6084/m9.figshare.4903822	na	na	na
TARA_RED_MAG_00077	Delmont et al. (2018) Nature Microbiology	figshare	10.6084/m9.figshare.4903823	na	na	na
TARA_RED_MAG_00078	Delmont et al. (2018) Nature Microbiology	figshare	10.6084/m9.figshare.4903824	na	na	na
TARA_RED_MAG_00079	Delmont et al. (2018) Nature Microbiology	figshare	10.6084/m9.figshare.4903825	na	na	na
TARA_RED_MAG_00080	Delmont et al. (2018) Nature Microbiology	figshare	10.6084/m9.figshare.4903826	na	na	na
TARA_RED_MAG_00081	Delmont et al. (2018) Nature Microbiology	figshare	10.6084/m9.figshare.4903827	na	na	na
TARA_RED_MAG_00082	Delmont et al. (2018) Nature Microbiology	figshare	10.6084/m9.figshare.4903828	na	na	na
TARA_RED_MAG_00083	Delmont et al. (2018) Nature Microbiology	figshare	10.6084/m9.figshare.4903829	na	na	na
TARA_RED_MAG_00084	Delmont et al. (2018) Nature Microbiology	figshare	10.6084/m9.figshare.4903830	na	na	na
TARA_RED_MAG_00085	Delmont et al. (2018) Nature Microbiology	figshare	10.6084/m9.figshare.4903831	na	na	na
TARA_RED_MAG_00086	Delmont et al. (2018) Nature Microbiology	figshare	10.6084/m9.figshare.4903832	na	na	na
TARA_RED_MAG_00087	Delmont et al. (2018) Nature Microbiology	figshare	10.6084/m9.figshare.4903833	na	na	na
TARA_RED_MAG_00089	Delmont et al. (2018) Nature Microbiology	figshare	10.6084/m9.figshare.4903834	na	na	na
TARA_RED_MAG_00090	Delmont et al. (2018) Nature Microbiology	figshare	10.6084/m9.figshare.4903835	na	na	na
TARA_RED_MAG_00091	Delmont et al. (2018) Nature Microbiology	figshare	10.6084/m9.figshare.4903836	na	na	na
TARA_RED_MAG_00092	Delmont et al. (2018) Nature Microbiology	figshare	10.6084/m9.figshare.4903837	na	na	na
TARA_RED_MAG_00093	Delmont et al. (2018) Nature Microbiology	figshare	10.6084/m9.figshare.4903838	na	na	na
TARA_RED_MAG_00094	Delmont et al. (2018) Nature Microbiology	figshare	10.6084/m9.figshare.4903839	na	na	na
TARA_RED_MAG_00096	Delmont et al. (2018) Nature Microbiology	figshare	10.6084/m9.figshare.4903840	na	na	na
TARA_RED_MAG_00097	Delmont et al. (2018) Nature Microbiology	figshare	10.6084/m9.figshare.4903841	na	na	na
TARA_RED_MAG_00098	Delmont et al. (2018) Nature Microbiology	figshare	10.6084/m9.figshare.4903842	na	na	na
TARA_RED_MAG_00099	Delmont et al. (2018) Nature Microbiology	figshare	10.6084/m9.figshare.4903843	na	na	na
TARA_RED_MAG_00100	Delmont et al. (2018) Nature Microbiology	figshare	10.6084/m9.figshare.4903844	na	na	na
TARA_RED_MAG_00101	Delmont et al. (2018) Nature Microbiology	figshare	10.6084/m9.figshare.4903845	na	na	na
TARA_RED_MAG_00102	Delmont et al. (2018) Nature Microbiology	figshare	10.6084/m9.figshare.4903846	na	na	na
TARA_RED_MAG_00103	Delmont et al. (2018) Nature Microbiology	figshare	10.6084/m9.figshare.4903847	na	na	na
TARA_RED_MAG_00104	Delmont et al. (2018) Nature Microbiology	figshare	10.6084/m9.figshare.4903848	na	na	na
TARA_RED_MAG_00105	Delmont et al. (2018) Nature Microbiology	figshare	10.6084/m9.figshare.4903849	na	na	na
TARA_RED_MAG_00106	Delmont et al. (2018) Nature Microbiology	figshare	10.6084/m9.figshare.4903850	na	na	na
TARA_RED_MAG_00108	Delmont et al. (2018) Nature Microbiology	figshare	10.6084/m9.figshare.4903851	na	na	na
TARA_RED_MAG_00109	Delmont et al. (2018) Nature Microbiology	figshare	10.6084/m9.figshare.4903852	na	na	na
TARA_RED_MAG_00110	Delmont et al. (2018) Nature Microbiology	figshare	10.6084/m9.figshare.4903853	na	na	na
TARA_RED_MAG_00111	Delmont et al. (2018) Nature Microbiology	figshare	10.6084/m9.figshare.4903854	na	na	na
TARA_RED_MAG_00112	Delmont et al. (2018) Nature Microbiology	figshare	10.6084/m9.figshare.4903855	na	na	na
TARA_RED_MAG_00113	Delmont et al. (2018) Nature Microbiology	figshare	10.6084/m9.figshare.4903856	na	na	na
TARA_RED_MAG_00114	Delmont et al. (2018) Nature Microbiology	figshare	10.6084/m9.figshare.4903857	na	na	na
TARA_RED_MAG_00115	Delmont et al. (2018) Nature Microbiology	figshare	10.6084/m9.figshare.4903858	na	na	na
TARA_RED_MAG_00116	Delmont et al. (2018) Nature Microbiology	figshare	10.6084/m9.figshare.4903859	na	na	na
TARA_RED_MAG_00117	Delmont et al. (2018) Nature Microbiology	figshare	10.6084/m9.figshare.4903860	na	na	na
TARA_RED_MAG_00118	Delmont et al. (2018) Nature Microbiology	figshare	10.6084/m9.figshare.4903861	na	na	na
TARA_RED_MAG_00119	Delmont et al. (2018) Nature Microbiology	figshare	10.6084/m9.figshare.4903862	na	na	na
TARA_RED_MAG_00120	Delmont et al. (2018) Nature Microbiology	figshare	10.6084/m9.figshare.4903863	na	na	na
TARA_RED_MAG_00121	Delmont et al. (2018) Nature Microbiology	figshare	10.6084/m9.figshare.4903864	na	na	na
TARA_RED_MAG_00122	Delmont et al. (2018) Nature Microbiology	figshare	10.6084/m9.figshare.4903865	na	na	na
TARA_RED_MAG_00123	Delmont et al. (2018) Nature Microbiology	figshare	10.6084/m9.figshare.4903866	na	na	na
TARA_SOC_MAG_00001	Delmont et al. (2018) Nature Microbiology	figshare	10.6084/m9.figshare.4903867	na	na	na
TARA_SOC_MAG_00002	Delmont et al. (2018) Nature Microbiology	figshare	10.6084/m9.figshare.4903868	na	na	na
TARA_SOC_MAG_00003	Delmont et al. (2018) Nature Microbiology	figshare	10.6084/m9.figshare.4903869	na	na	na
TARA_SOC_MAG_00004	Delmont et al. (2018) Nature Microbiology	figshare	10.6084/m9.figshare.4903870	na	na	na
TARA_SOC_MAG_00005	Delmont et al. (2018) Nature Microbiology	figshare	10.6084/m9.figshare.4903871	na	na	na
TARA_SOC_MAG_00006	Delmont et al. (2018) Nature Microbiology	figshare	10.6084/m9.figshare.4903872	na	na	na
TARA_SOC_MAG_00007	Delmont et al. (2018) Nature Microbiology	figshare	10.6084/m9.figshare.4903873	na	na	na
TARA_SOC_MAG_00008	Delmont et al. (2018) Nature Microbiology	figshare	10.6084/m9.figshare.4903874	na	na	na
TARA_SOC_MAG_00010	Delmont et al. (2018) Nature Microbiology	figshare	10.6084/m9.figshare.4903875	na	na	na
TARA_SOC_MAG_00011	Delmont et al. (2018) Nature Microbiology	figshare	10.6084/m9.figshare.4903876	na	na	na
TARA_SOC_MAG_00012	Delmont et al. (2018) Nature Microbiology	figshare	10.6084/m9.figshare.4903877	na	na	na
TARA_SOC_MAG_00013	Delmont et al. (2018) Nature Microbiology	figshare	10.6084/m9.figshare.4903878	na	na	na
TARA_SOC_MAG_00014	Delmont et al. (2018) Nature Microbiology	figshare	10.6084/m9.figshare.4903879	na	na	na
Acidimicrobiaceae bacterium UBA7323	Parks et al. (2017) Nature Microbiology	NCBI	na	DKPX00000000	na	na
Acidimicrobiaceae bacterium UBA7830	Parks et al. (2017) Nature Microbiology	NCBI	na	DLTS00000000	na	na
Acidimicrobiia bacterium UBA1281	Parks et al. (2017) Nature Microbiology	NCBI	na	DBUV00000000	na	na
Acidobacteria bacterium UBA2140	Parks et al. (2017) Nature Microbiology	NCBI	na	DCXI00000000	na	na
Acidobacteria bacterium UBA2161	Parks et al. (2017) Nature Microbiology	NCBI	na	DCWN00000000	na	na
Acidobacteria bacterium UBA2167	Parks et al. (2017) Nature Microbiology	NCBI	na	DCWH00000000	na	na
Acidobacteria bacterium UBA2990	Parks et al. (2017) Nature Microbiology	NCBI	na	DEAE00000000	na	na
Acidobacteria bacterium UBA2994	Parks et al. (2017) Nature Microbiology	NCBI	na	DEAA00000000	na	na
Acidobacteria bacterium UBA2999	Parks et al. (2017) Nature Microbiology	NCBI	na	DDZV00000000	na	na
Acidobacteria bacterium UBA5166	Parks et al. (2017) Nature Microbiology	NCBI	na	DHXC00000000	na	na
Acidobacteria bacterium UBA6628	Parks et al. (2017) Nature Microbiology	NCBI	na	DKLY00000000	na	na
Acidobacteria bacterium UBA823	Parks et al. (2017) Nature Microbiology	NCBI	na	DBHR00000000	na	na
Acidobacteria bacterium UBA890	Parks et al. (2017) Nature Microbiology	NCBI	na	DBFC00000000	na	na
Acinetobacter sp UBA6526	Parks et al. (2017) Nature Microbiology	NCBI	na	DJLC00000000	na	na
Actibacterium sp UBA681	Parks et al. (2017) Nature Microbiology	NCBI	na	DBND00000000	na	na
Actinobacteria bacterium UBA1526	Parks et al. (2017) Nature Microbiology	NCBI	na	DCQE00000000	na	na
Actinobacteria bacterium UBA1967	Parks et al. (2017) Nature Microbiology	NCBI	na	DDDZ00000000	na	na
Actinobacteria bacterium UBA1985	Parks et al. (2017) Nature Microbiology	NCBI	na	DDDH00000000	na	na
Actinobacteria bacterium UBA2519	Parks et al. (2017) Nature Microbiology	NCBI	na	DDNN00000000	na	na
Actinobacteria bacterium UBA2641	Parks et al. (2017) Nature Microbiology	NCBI	na	DENP00000000	na	na
Actinobacteria bacterium UBA2967	Parks et al. (2017) Nature Microbiology	NCBI	na	DEBB00000000	na	na
Actinobacteria bacterium UBA5693	Parks et al. (2017) Nature Microbiology	NCBI	na	DIHP00000000	na	na
Aequorivita sp UBA1901	Parks et al. (2017) Nature Microbiology	NCBI	na	DDGN00000000	na	na
Aequorivita sp UBA3101	Parks et al. (2017) Nature Microbiology	NCBI	na	DFAR00000000	na	na
Aequorivita sp UBA3180	Parks et al. (2017) Nature Microbiology	NCBI	na	DEXQ00000000	na	na
Aequorivita sp UBA3185	Parks et al. (2017) Nature Microbiology	NCBI	na	DEXL00000000	na	na
Aequorivita sp UBA3599	Parks et al. (2017) Nature Microbiology	NCBI	na	DFMG00000000	na	na
Aequorivita sp UBA3995	Parks et al. (2017) Nature Microbiology	NCBI	na	DGBV00000000	na	na
Aequorivita sp UBA3997	Parks et al. (2017) Nature Microbiology	NCBI	na	DGBT00000000	na	na
Aequorivita sp UBA5053	Parks et al. (2017) Nature Microbiology	NCBI	na	DIBL00000000	na	na
Aequorivita sp UBA5087	Parks et al. (2017) Nature Microbiology	NCBI	na	DIAD00000000	na	na
Aequorivita sp UBA5094	Parks et al. (2017) Nature Microbiology	NCBI	na	DHZW00000000	na	na
Aequorivita sp UBA5096	Parks et al. (2017) Nature Microbiology	NCBI	na	DHZU00000000	na	na
Aequorivita sp UBA5106	Parks et al. (2017) Nature Microbiology	NCBI	na	DHZK00000000	na	na
Aequorivita sp UBA6784	Parks et al. (2017) Nature Microbiology	NCBI	na	DKFY00000000	na	na
Akkermansiaceae bacterium UBA1009	Parks et al. (2017) Nature Microbiology	NCBI	na	DBAN00000000	na	na
Akkermansiaceae bacterium UBA1011	Parks et al. (2017) Nature Microbiology	NCBI	na	DBAL00000000	na	na
Akkermansiaceae bacterium UBA1090	Parks et al. (2017) Nature Microbiology	NCBI	na	DCCD00000000	na	na
Akkermansiaceae bacterium UBA1506	Parks et al. (2017) Nature Microbiology	NCBI	na	DCQY00000000	na	na
Akkermansiaceae bacterium UBA1507	Parks et al. (2017) Nature Microbiology	NCBI	na	DCQX00000000	na	na
Akkermansiaceae bacterium UBA1518	Parks et al. (2017) Nature Microbiology	NCBI	na	DCQM00000000	na	na
Akkermansiaceae bacterium UBA1527	Parks et al. (2017) Nature Microbiology	NCBI	na	DCQD00000000	na	na
Akkermansiaceae bacterium UBA1955	Parks et al. (2017) Nature Microbiology	NCBI	na	DDEL00000000	na	na
Akkermansiaceae bacterium UBA1982	Parks et al. (2017) Nature Microbiology	NCBI	na	DDDK00000000	na	na
Akkermansiaceae bacterium UBA3157	Parks et al. (2017) Nature Microbiology	NCBI	na	DEYN00000000	na	na
Akkermansiaceae bacterium UBA4145	Parks et al. (2017) Nature Microbiology	NCBI	na	DFWB00000000	na	na
Akkermansiaceae bacterium UBA5688	Parks et al. (2017) Nature Microbiology	NCBI	na	DIHU00000000	na	na
Akkermansiaceae bacterium UBA5689	Parks et al. (2017) Nature Microbiology	NCBI	na	DIHT00000000	na	na
Akkermansiaceae bacterium UBA6541	Parks et al. (2017) Nature Microbiology	NCBI	na	DJKN00000000	na	na
Akkermansiaceae bacterium UBA6946	Parks et al. (2017) Nature Microbiology	NCBI	na	DJZS00000000	na	na
Akkermansiaceae bacterium UBA7329	Parks et al. (2017) Nature Microbiology	NCBI	na	DKPR00000000	na	na
Akkermansiaceae bacterium UBA7811	Parks et al. (2017) Nature Microbiology	NCBI	na	DLBZ00000000	na	na
Akkermansiaceae bacterium UBA7890	Parks et al. (2017) Nature Microbiology	NCBI	na	DLRK00000000	na	na
Alcanivorax sp UBA1092	Parks et al. (2017) Nature Microbiology	NCBI	na	DCCB00000000	na	na
Alcanivorax sp UBA1475	Parks et al. (2017) Nature Microbiology	NCBI	na	DCSD00000000	na	na
Alcanivorax sp UBA1504	Parks et al. (2017) Nature Microbiology	NCBI	na	DCRA00000000	na	na
Alcanivorax sp UBA1608	Parks et al. (2017) Nature Microbiology	NCBI	na	DCNA00000000	na	na
Alcanivorax sp UBA1614	Parks et al. (2017) Nature Microbiology	NCBI	na	DCMU00000000	na	na
Alcanivorax sp UBA1911	Parks et al. (2017) Nature Microbiology	NCBI	na	DDGD00000000	na	na
Alcanivorax sp UBA1913	Parks et al. (2017) Nature Microbiology	NCBI	na	DDGB00000000	na	na
Alcanivorax sp UBA1972	Parks et al. (2017) Nature Microbiology	NCBI	na	DDDU00000000	na	na
Alcanivorax sp UBA2114	Parks et al. (2017) Nature Microbiology	NCBI	na	DCYI00000000	na	na
Alcanivorax sp UBA2509	Parks et al. (2017) Nature Microbiology	NCBI	na	DDNX00000000	na	na
Alcanivorax sp UBA2512	Parks et al. (2017) Nature Microbiology	NCBI	na	DDNU00000000	na	na
Alcanivorax sp UBA2685	Parks et al. (2017) Nature Microbiology	NCBI	na	DELX00000000	na	na
Alcanivorax sp UBA2694	Parks et al. (2017) Nature Microbiology	NCBI	na	DELO00000000	na	na
Alcanivorax sp UBA3183	Parks et al. (2017) Nature Microbiology	NCBI	na	DEXN00000000	na	na
Alcanivorax sp UBA3194	Parks et al. (2017) Nature Microbiology	NCBI	na	DEXC00000000	na	na
Alcanivorax sp UBA3353	Parks et al. (2017) Nature Microbiology	NCBI	na	DEQZ00000000	na	na
Alcanivorax sp UBA3585	Parks et al. (2017) Nature Microbiology	NCBI	na	DFMU00000000	na	na
Alcanivorax sp UBA3985	Parks et al. (2017) Nature Microbiology	NCBI	na	DGCF00000000	na	na
Alcanivorax sp UBA3989	Parks et al. (2017) Nature Microbiology	NCBI	na	DGCB00000000	na	na
Alcanivorax sp UBA4150	Parks et al. (2017) Nature Microbiology	NCBI	na	DFVW00000000	na	na
Alcanivorax sp UBA4152	Parks et al. (2017) Nature Microbiology	NCBI	na	DFVU00000000	na	na
Alcanivorax sp UBA4521	Parks et al. (2017) Nature Microbiology	NCBI	na	DGMJ00000000	na	na
Alcanivorax sp UBA4527	Parks et al. (2017) Nature Microbiology	NCBI	na	DGMD00000000	na	na
Alcanivorax sp UBA4543	Parks et al. (2017) Nature Microbiology	NCBI	na	DGLN00000000	na	na
Alcanivorax sp UBA5084	Parks et al. (2017) Nature Microbiology	NCBI	na	DIAG00000000	na	na
Alcanivorax sp UBA5099	Parks et al. (2017) Nature Microbiology	NCBI	na	DHZR00000000	na	na
Alcanivorax sp UBA5163	Parks et al. (2017) Nature Microbiology	NCBI	na	DHXF00000000	na	na
Alcanivorax sp UBA6607	Parks et al. (2017) Nature Microbiology	NCBI	na	DJHZ00000000	na	na
Alcanivorax sp UBA679	Parks et al. (2017) Nature Microbiology	NCBI	na	DBNF00000000	na	na
Algoriphagus sp UBA3586	Parks et al. (2017) Nature Microbiology	NCBI	na	DFMT00000000	na	na
Alphaproteobacteria bacterium UBA1172	Parks et al. (2017) Nature Microbiology	NCBI	na	DBZA00000000	na	na
Alphaproteobacteria bacterium UBA1271	Parks et al. (2017) Nature Microbiology	NCBI	na	DBVF00000000	na	na
Alphaproteobacteria bacterium UBA1324	Parks et al. (2017) Nature Microbiology	NCBI	na	DBTE00000000	na	na
Alphaproteobacteria bacterium UBA1326	Parks et al. (2017) Nature Microbiology	NCBI	na	DBTC00000000	na	na
Alphaproteobacteria bacterium UBA1330	Parks et al. (2017) Nature Microbiology	NCBI	na	DBSY00000000	na	na
Alphaproteobacteria bacterium UBA1485	Parks et al. (2017) Nature Microbiology	NCBI	na	DCRT00000000	na	na
Alphaproteobacteria bacterium UBA1509	Parks et al. (2017) Nature Microbiology	NCBI	na	DCQV00000000	na	na
Alphaproteobacteria bacterium UBA1904	Parks et al. (2017) Nature Microbiology	NCBI	na	DDGK00000000	na	na
Alphaproteobacteria bacterium UBA1908	Parks et al. (2017) Nature Microbiology	NCBI	na	DDGG00000000	na	na
Alphaproteobacteria bacterium UBA1925	Parks et al. (2017) Nature Microbiology	NCBI	na	DDFP00000000	na	na
Alphaproteobacteria bacterium UBA2662	Parks et al. (2017) Nature Microbiology	NCBI	na	DEMU00000000	na	na
Alphaproteobacteria bacterium UBA2954	Parks et al. (2017) Nature Microbiology	NCBI	na	DEBO00000000	na	na
Alphaproteobacteria bacterium UBA2964	Parks et al. (2017) Nature Microbiology	NCBI	na	DEBE00000000	na	na
Alphaproteobacteria bacterium UBA2966	Parks et al. (2017) Nature Microbiology	NCBI	na	DEBC00000000	na	na
Alphaproteobacteria bacterium UBA2973	Parks et al. (2017) Nature Microbiology	NCBI	na	DEAV00000000	na	na
Alphaproteobacteria bacterium UBA2984	Parks et al. (2017) Nature Microbiology	NCBI	na	DEAK00000000	na	na
Alphaproteobacteria bacterium UBA3002	Parks et al. (2017) Nature Microbiology	NCBI	na	DDZS00000000	na	na
Alphaproteobacteria bacterium UBA3203	Parks et al. (2017) Nature Microbiology	NCBI	na	DEWT00000000	na	na
Alphaproteobacteria bacterium UBA3205	Parks et al. (2017) Nature Microbiology	NCBI	na	DEWR00000000	na	na
Alphaproteobacteria bacterium UBA3502	Parks et al. (2017) Nature Microbiology	NCBI	na	DFPZ00000000	na	na
Alphaproteobacteria bacterium UBA3504	Parks et al. (2017) Nature Microbiology	NCBI	na	DFPX00000000	na	na
Alphaproteobacteria bacterium UBA3612	Parks et al. (2017) Nature Microbiology	NCBI	na	DFLT00000000	na	na
Alphaproteobacteria bacterium UBA3994	Parks et al. (2017) Nature Microbiology	NCBI	na	DGBW00000000	na	na
Alphaproteobacteria bacterium UBA5046	Parks et al. (2017) Nature Microbiology	NCBI	na	DIBS00000000	na	na
Alphaproteobacteria bacterium UBA5058	Parks et al. (2017) Nature Microbiology	NCBI	na	DIBG00000000	na	na
Alphaproteobacteria bacterium UBA5086	Parks et al. (2017) Nature Microbiology	NCBI	na	DIAE00000000	na	na
Alphaproteobacteria bacterium UBA5103	Parks et al. (2017) Nature Microbiology	NCBI	na	DHZN00000000	na	na
Alphaproteobacteria bacterium UBA6544	Parks et al. (2017) Nature Microbiology	NCBI	na	DJKK00000000	na	na
Alphaproteobacteria bacterium UBA6605	Parks et al. (2017) Nature Microbiology	NCBI	na	DJIB00000000	na	na
Alphaproteobacteria bacterium UBA6615	Parks et al. (2017) Nature Microbiology	NCBI	na	DJHR00000000	na	na
Alphaproteobacteria bacterium UBA6962	Parks et al. (2017) Nature Microbiology	NCBI	na	DJZC00000000	na	na
Alphaproteobacteria bacterium UBA723	Parks et al. (2017) Nature Microbiology	NCBI	na	DBLN00000000	na	na
Alphaproteobacteria bacterium UBA7314	Parks et al. (2017) Nature Microbiology	NCBI	na	DKQG00000000	na	na
Alphaproteobacteria bacterium UBA7371	Parks et al. (2017) Nature Microbiology	NCBI	na	DKOD00000000	na	na
Alphaproteobacteria bacterium UBA7887	Parks et al. (2017) Nature Microbiology	NCBI	na	DLRN00000000	na	na
Alphaproteobacteria bacterium UBA7893	Parks et al. (2017) Nature Microbiology	NCBI	na	DLRH00000000	na	na
Alphaproteobacteria bacterium UBA815	Parks et al. (2017) Nature Microbiology	NCBI	na	DBHZ00000000	na	na
Alphaproteobacteria bacterium UBA828	Parks et al. (2017) Nature Microbiology	NCBI	na	DBHM00000000	na	na
Alphaproteobacteria bacterium UBA830	Parks et al. (2017) Nature Microbiology	NCBI	na	DBHK00000000	na	na
Alteromonadaceae bacterium UBA1089	Parks et al. (2017) Nature Microbiology	NCBI	na	DCCE00000000	na	na
Alteromonadaceae bacterium UBA1099	Parks et al. (2017) Nature Microbiology	NCBI	na	DCBU00000000	na	na
Alteromonadaceae bacterium UBA1282	Parks et al. (2017) Nature Microbiology	NCBI	na	DBUU00000000	na	na
Alteromonadaceae bacterium UBA1334	Parks et al. (2017) Nature Microbiology	NCBI	na	DBSU00000000	na	na
Alteromonadaceae bacterium UBA1517	Parks et al. (2017) Nature Microbiology	NCBI	na	DCQN00000000	na	na
Alteromonadaceae bacterium UBA1974	Parks et al. (2017) Nature Microbiology	NCBI	na	DDDS00000000	na	na
Alteromonadaceae bacterium UBA1980	Parks et al. (2017) Nature Microbiology	NCBI	na	DDDM00000000	na	na
Alteromonadaceae bacterium UBA2620	Parks et al. (2017) Nature Microbiology	NCBI	na	DDJQ00000000	na	na
Alteromonadaceae bacterium UBA3345	Parks et al. (2017) Nature Microbiology	NCBI	na	DERH00000000	na	na
Alteromonadaceae bacterium UBA6945	Parks et al. (2017) Nature Microbiology	NCBI	na	DJZT00000000	na	na
Alteromonadaceae bacterium UBA7296	Parks et al. (2017) Nature Microbiology	NCBI	na	DKQY00000000	na	na
Alteromonadaceae bacterium UBA7313	Parks et al. (2017) Nature Microbiology	NCBI	na	DKQH00000000	na	na
Alteromonadaceae bacterium UBA7387	Parks et al. (2017) Nature Microbiology	NCBI	na	DKNN00000000	na	na
Alteromonadaceae bacterium UBA7799	Parks et al. (2017) Nature Microbiology	NCBI	na	DLCL00000000	na	na
Alteromonadaceae bacterium UBA7877	Parks et al. (2017) Nature Microbiology	NCBI	na	DLRX00000000	na	na
Alteromonadaceae bacterium UBA820	Parks et al. (2017) Nature Microbiology	NCBI	na	DBHU00000000	na	na
Alteromonadaceae bacterium UBA858	Parks et al. (2017) Nature Microbiology	NCBI	na	DBGI00000000	na	na
Alteromonadaceae bacterium UBA884	Parks et al. (2017) Nature Microbiology	NCBI	na	DBFI00000000	na	na
Alteromonas sp UBA1848	Parks et al. (2017) Nature Microbiology	NCBI	na	DDIO00000000	na	na
Alteromonas sp UBA2493	Parks et al. (2017) Nature Microbiology	NCBI	na	DDON00000000	na	na
Anaerolineales bacterium UBA3001	Parks et al. (2017) Nature Microbiology	NCBI	na	DDZT00000000	na	na
Anaerolineales bacterium UBA3499	Parks et al. (2017) Nature Microbiology	NCBI	na	DFQC00000000	na	na
Anaerolineales bacterium UBA832	Parks et al. (2017) Nature Microbiology	NCBI	na	DBHI00000000	na	na
archaeon UBA140 DAPB00000000	Parks et al. (2017) Nature Microbiology	NCBI	na		na	na
archaeon UBA490 DACC00000000	Parks et al. (2017) Nature Microbiology	NCBI	na		na	na
archaeon UBA543 DAPM00000000	Parks et al. (2017) Nature Microbiology	NCBI	na		na	na
Arenibacter sp UBA3178	Parks et al. (2017) Nature Microbiology	NCBI	na	DEXS00000000	na	na
Arenibacter sp UBA3199	Parks et al. (2017) Nature Microbiology	NCBI	na	DEWX00000000	na	na
Arsukibacterium sp UBA3155	Parks et al. (2017) Nature Microbiology	NCBI	na	DEYP00000000	na	na
Arsukibacterium sp UBA3189	Parks et al. (2017) Nature Microbiology	NCBI	na	DEXH00000000	na	na
Arsukibacterium sp UBA4203	Parks et al. (2017) Nature Microbiology	NCBI	na	DFTV00000000	na	na
Arsukibacterium sp UBA4212	Parks et al. (2017) Nature Microbiology	NCBI	na	DFTM00000000	na	na
Arsukibacterium sp UBA5043	Parks et al. (2017) Nature Microbiology	NCBI	na	DIBV00000000	na	na
Bacteriovoracaceae bacterium UBA1331	Parks et al. (2017) Nature Microbiology	NCBI	na	DBSX00000000	na	na
Bacteriovoracaceae bacterium UBA1511	Parks et al. (2017) Nature Microbiology	NCBI	na	DCQT00000000	na	na
Bacteriovoracaceae bacterium UBA3346	Parks et al. (2017) Nature Microbiology	NCBI	na	DERG00000000	na	na
Bacteriovoracaceae bacterium UBA3347	Parks et al. (2017) Nature Microbiology	NCBI	na	DERF00000000	na	na
Bacteriovoracaceae bacterium UBA4207	Parks et al. (2017) Nature Microbiology	NCBI	na	DFTR00000000	na	na
Bacteriovoracaceae bacterium UBA6504	Parks et al. (2017) Nature Microbiology	NCBI	na	DJLY00000000	na	na
Bacteriovoracaceae bacterium UBA6507	Parks et al. (2017) Nature Microbiology	NCBI	na	DJLV00000000	na	na
Bacteriovoracaceae bacterium UBA6935	Parks et al. (2017) Nature Microbiology	NCBI	na	DKAD00000000	na	na
Bacteriovoracaceae bacterium UBA7317	Parks et al. (2017) Nature Microbiology	NCBI	na	DKQD00000000	na	na
Bacteriovoracaceae bacterium UBA843	Parks et al. (2017) Nature Microbiology	NCBI	na	DBGX00000000	na	na
Bacteriovoracaceae bacterium UBA845	Parks et al. (2017) Nature Microbiology	NCBI	na	DBGV00000000	na	na
Bacteriovorax sp UBA1852	Parks et al. (2017) Nature Microbiology	NCBI	na	DDIK00000000	na	na
Bacteriovorax sp UBA2704	Parks et al. (2017) Nature Microbiology	NCBI	na	DELE00000000	na	na
bacterium UBP7 UBA6624	Parks et al. (2017) Nature Microbiology	NCBI	na	DKMC00000000	na	na
bacterium UBP7 UBA7824	Parks et al. (2017) Nature Microbiology	NCBI	na	DLTY00000000	na	na
bacterium UBP8 UBA6595	Parks et al. (2017) Nature Microbiology	NCBI	na	DJIL00000000	na	na
bacterium UBP8 UBA7324	Parks et al. (2017) Nature Microbiology	NCBI	na	DKPW00000000	na	na
bacterium UBP8 UBA7816	Parks et al. (2017) Nature Microbiology	NCBI	na	DLBU00000000	na	na
bacterium UBP8 UBA817	Parks et al. (2017) Nature Microbiology	NCBI	na	DBHX00000000	na	na
bacterium UBP8 UBA827	Parks et al. (2017) Nature Microbiology	NCBI	na	DBHN00000000	na	na
Bacteroidetes bacterium UBA1860	Parks et al. (2017) Nature Microbiology	NCBI	na	DDIC00000000	na	na
Bacteroidetes bacterium UBA2664	Parks et al. (2017) Nature Microbiology	NCBI	na	DEMS00000000	na	na
Balneolaceae bacterium UBA1093	Parks et al. (2017) Nature Microbiology	NCBI	na	DCCA00000000	na	na
Balneolaceae bacterium UBA1275	Parks et al. (2017) Nature Microbiology	NCBI	na	DBVB00000000	na	na
Balneolaceae bacterium UBA1481	Parks et al. (2017) Nature Microbiology	NCBI	na	DCRX00000000	na	na
Balneolaceae bacterium UBA1486	Parks et al. (2017) Nature Microbiology	NCBI	na	DCRS00000000	na	na
Balneolaceae bacterium UBA1488	Parks et al. (2017) Nature Microbiology	NCBI	na	DCRQ00000000	na	na
Balneolaceae bacterium UBA1514	Parks et al. (2017) Nature Microbiology	NCBI	na	DCQQ00000000	na	na
Balneolaceae bacterium UBA1971	Parks et al. (2017) Nature Microbiology	NCBI	na	DDDV00000000	na	na
Balneolaceae bacterium UBA2500	Parks et al. (2017) Nature Microbiology	NCBI	na	DDOG00000000	na	na
Balneolaceae bacterium UBA2665	Parks et al. (2017) Nature Microbiology	NCBI	na	DEMR00000000	na	na
Balneolaceae bacterium UBA2670	Parks et al. (2017) Nature Microbiology	NCBI	na	DEMM00000000	na	na
Balneolaceae bacterium UBA2676	Parks et al. (2017) Nature Microbiology	NCBI	na	DEMG00000000	na	na
Balneolaceae bacterium UBA2695	Parks et al. (2017) Nature Microbiology	NCBI	na	DELN00000000	na	na
Balneolaceae bacterium UBA2956	Parks et al. (2017) Nature Microbiology	NCBI	na	DEBM00000000	na	na
Balneolaceae bacterium UBA2959	Parks et al. (2017) Nature Microbiology	NCBI	na	DEBJ00000000	na	na
Balneolaceae bacterium UBA3181	Parks et al. (2017) Nature Microbiology	NCBI	na	DEXP00000000	na	na
Balneolaceae bacterium UBA3184	Parks et al. (2017) Nature Microbiology	NCBI	na	DEXM00000000	na	na
Balneolaceae bacterium UBA3186	Parks et al. (2017) Nature Microbiology	NCBI	na	DEXK00000000	na	na
Balneolaceae bacterium UBA3193	Parks et al. (2017) Nature Microbiology	NCBI	na	DEXD00000000	na	na
Balneolaceae bacterium UBA3202	Parks et al. (2017) Nature Microbiology	NCBI	na	DEWU00000000	na	na
Balneolaceae bacterium UBA3590	Parks et al. (2017) Nature Microbiology	NCBI	na	DFMP00000000	na	na
Balneolaceae bacterium UBA3597	Parks et al. (2017) Nature Microbiology	NCBI	na	DFMI00000000	na	na
Balneolaceae bacterium UBA3598	Parks et al. (2017) Nature Microbiology	NCBI	na	DFMH00000000	na	na
Balneolaceae bacterium UBA3974	Parks et al. (2017) Nature Microbiology	NCBI	na	DGCQ00000000	na	na
Balneolaceae bacterium UBA3998	Parks et al. (2017) Nature Microbiology	NCBI	na	DGBS00000000	na	na
Balneolaceae bacterium UBA4214	Parks et al. (2017) Nature Microbiology	NCBI	na	DFTK00000000	na	na
Balneolaceae bacterium UBA4499	Parks et al. (2017) Nature Microbiology	NCBI	na	DGNF00000000	na	na
Balneolaceae bacterium UBA4511	Parks et al. (2017) Nature Microbiology	NCBI	na	DGMT00000000	na	na
Balneolaceae bacterium UBA4522	Parks et al. (2017) Nature Microbiology	NCBI	na	DGMI00000000	na	na
Balneolaceae bacterium UBA5060	Parks et al. (2017) Nature Microbiology	NCBI	na	DIBE00000000	na	na
Balneolaceae bacterium UBA5064	Parks et al. (2017) Nature Microbiology	NCBI	na	DIBA00000000	na	na
Balneolaceae bacterium UBA5080	Parks et al. (2017) Nature Microbiology	NCBI	na	DIAK00000000	na	na
Balneolaceae bacterium UBA5089	Parks et al. (2017) Nature Microbiology	NCBI	na	DIAB00000000	na	na
Balneolaceae bacterium UBA5090	Parks et al. (2017) Nature Microbiology	NCBI	na	DIAA00000000	na	na
Balneolaceae bacterium UBA5097	Parks et al. (2017) Nature Microbiology	NCBI	na	DHZT00000000	na	na
Balneolaceae bacterium UBA5104	Parks et al. (2017) Nature Microbiology	NCBI	na	DHZM00000000	na	na
Balneolaceae bacterium UBA5722	Parks et al. (2017) Nature Microbiology	NCBI	na	DIGM00000000	na	na
Balneolaceae bacterium UBA6773	Parks et al. (2017) Nature Microbiology	NCBI	na	DKGJ00000000	na	na
Balneolaceae bacterium UBA7797	Parks et al. (2017) Nature Microbiology	NCBI	na	DLCN00000000	na	na
Balneolaceae bacterium UBA813	Parks et al. (2017) Nature Microbiology	NCBI	na	DBIB00000000	na	na
Bdellovibrionaceae bacterium UBA1609	Parks et al. (2017) Nature Microbiology	NCBI	na	DCMZ00000000	na	na
Bdellovibrionaceae bacterium UBA3342	Parks et al. (2017) Nature Microbiology	NCBI	na	DERK00000000	na	na
Bdellovibrionaceae bacterium UBA3359	Parks et al. (2017) Nature Microbiology	NCBI	na	DEQT00000000	na	na
Bdellovibrionaceae bacterium UBA3471	Parks et al. (2017) Nature Microbiology	NCBI	na	DFRE00000000	na	na
Bdellovibrionaceae bacterium UBA3535	Parks et al. (2017) Nature Microbiology	NCBI	na	DFOS00000000	na	na
Bdellovibrionaceae bacterium UBA3536	Parks et al. (2017) Nature Microbiology	NCBI	na	DFOR00000000	na	na
Bdellovibrionaceae bacterium UBA6502	Parks et al. (2017) Nature Microbiology	NCBI	na	DJMA00000000	na	na
Bdellovibrionaceae bacterium UBA6518	Parks et al. (2017) Nature Microbiology	NCBI	na	DJLK00000000	na	na
Bdellovibrionaceae bacterium UBA6543	Parks et al. (2017) Nature Microbiology	NCBI	na	DJKL00000000	na	na
Bdellovibrionaceae bacterium UBA6776	Parks et al. (2017) Nature Microbiology	NCBI	na	DKGG00000000	na	na
Bdellovibrionaceae bacterium UBA680	Parks et al. (2017) Nature Microbiology	NCBI	na	DBNE00000000	na	na
Bdellovibrionaceae bacterium UBA7794	Parks et al. (2017) Nature Microbiology	NCBI	na	DLCQ00000000	na	na
Bdellovibrionaceae bacterium UBA7827	Parks et al. (2017) Nature Microbiology	NCBI	na	DLTV00000000	na	na
Bdellovibrionaceae bacterium UBA818	Parks et al. (2017) Nature Microbiology	NCBI	na	DBHW00000000	na	na
Bdellovibrionaceae bacterium UBA835	Parks et al. (2017) Nature Microbiology	NCBI	na	DBHF00000000	na	na
Bdellovibrionaceae bacterium UBA840	Parks et al. (2017) Nature Microbiology	NCBI	na	DBHA00000000	na	na
Brevundimonas sp UBA1471	Parks et al. (2017) Nature Microbiology	NCBI	na	DCSH00000000	na	na
Brevundimonas sp UBA2497	Parks et al. (2017) Nature Microbiology	NCBI	na	DDOJ00000000	na	na
Brevundimonas sp UBA2503	Parks et al. (2017) Nature Microbiology	NCBI	na	DDOD00000000	na	na
Burkholderiales bacterium UBA7377	Parks et al. (2017) Nature Microbiology	NCBI	na	DKNX00000000	na	na
Candidatus Atelocyanobacterium thalassa UBA4158	Parks et al. (2017) Nature Microbiology	NCBI	na	DFVO00000000	na	na
Candidatus Diapherotrites archaeon UBA493	Parks et al. (2017) Nature Microbiology	NCBI	na	DAMB00000000	na	na
Candidatus Endolissoclinum sp UBA7326	Parks et al. (2017) Nature Microbiology	NCBI	na	DKPU00000000	na	na
Candidatus Endolissoclinum sp UBA7380	Parks et al. (2017) Nature Microbiology	NCBI	na	DKNU00000000	na	na
Candidatus Marinimicrobia bacterium UBA1611	Parks et al. (2017) Nature Microbiology	NCBI	na	DCMX00000000	na	na
Candidatus Marinimicrobia bacterium UBA2125	Parks et al. (2017) Nature Microbiology	NCBI	na	DCXX00000000	na	na
Candidatus Marinimicrobia bacterium UBA2126	Parks et al. (2017) Nature Microbiology	NCBI	na	DCXW00000000	na	na
Candidatus Marinimicrobia bacterium UBA2128	Parks et al. (2017) Nature Microbiology	NCBI	na	DCXU00000000	na	na
Candidatus Marinimicrobia bacterium UBA2129	Parks et al. (2017) Nature Microbiology	NCBI	na	DCXT00000000	na	na
Candidatus Marinimicrobia bacterium UBA2134	Parks et al. (2017) Nature Microbiology	NCBI	na	DCXO00000000	na	na
Candidatus Marinimicrobia bacterium UBA2146	Parks et al. (2017) Nature Microbiology	NCBI	na	DCXC00000000	na	na
Candidatus Marinimicrobia bacterium UBA2149	Parks et al. (2017) Nature Microbiology	NCBI	na	DCWZ00000000	na	na
Candidatus Marinimicrobia bacterium UBA2150	Parks et al. (2017) Nature Microbiology	NCBI	na	DCWY00000000	na	na
Candidatus Marinimicrobia bacterium UBA2151	Parks et al. (2017) Nature Microbiology	NCBI	na	DCWX00000000	na	na
Candidatus Marinimicrobia bacterium UBA2152	Parks et al. (2017) Nature Microbiology	NCBI	na	DCWW00000000	na	na
Candidatus Marinimicrobia bacterium UBA2153	Parks et al. (2017) Nature Microbiology	NCBI	na	DCWV00000000	na	na
Candidatus Marinimicrobia bacterium UBA2980	Parks et al. (2017) Nature Microbiology	NCBI	na	DEAO00000000	na	na
Candidatus Marinimicrobia bacterium UBA2986	Parks et al. (2017) Nature Microbiology	NCBI	na	DEAI00000000	na	na
Candidatus Marinimicrobia bacterium UBA2997	Parks et al. (2017) Nature Microbiology	NCBI	na	DDZX00000000	na	na
Candidatus Marinimicrobia bacterium UBA3000	Parks et al. (2017) Nature Microbiology	NCBI	na	DDZU00000000	na	na
Candidatus Marinimicrobia bacterium UBA5675	Parks et al. (2017) Nature Microbiology	NCBI	na	DIIH00000000	na	na
Candidatus Marinimicrobia bacterium UBA5677	Parks et al. (2017) Nature Microbiology	NCBI	na	DIIF00000000	na	na
Candidatus Marinimicrobia bacterium UBA5679	Parks et al. (2017) Nature Microbiology	NCBI	na	DIID00000000	na	na
Candidatus Marinimicrobia bacterium UBA5683	Parks et al. (2017) Nature Microbiology	NCBI	na	DIHZ00000000	na	na
Candidatus Marinimicrobia bacterium UBA6527	Parks et al. (2017) Nature Microbiology	NCBI	na	DJLB00000000	na	na
Candidatus Marinimicrobia bacterium UBA6528	Parks et al. (2017) Nature Microbiology	NCBI	na	DJLA00000000	na	na
Candidatus Marinimicrobia bacterium UBA6529	Parks et al. (2017) Nature Microbiology	NCBI	na	DJKZ00000000	na	na
Candidatus Marinimicrobia bacterium UBA6530	Parks et al. (2017) Nature Microbiology	NCBI	na	DJKY00000000	na	na
Candidatus Marinimicrobia bacterium UBA6531	Parks et al. (2017) Nature Microbiology	NCBI	na	DJKX00000000	na	na
Candidatus Marinimicrobia bacterium UBA6613	Parks et al. (2017) Nature Microbiology	NCBI	na	DJHT00000000	na	na
Candidatus Marinimicrobia bacterium UBA6630	Parks et al. (2017) Nature Microbiology	NCBI	na	DKLW00000000	na	na
Candidatus Marinimicrobia bacterium UBA6924	Parks et al. (2017) Nature Microbiology	NCBI	na	DKAO00000000	na	na
Candidatus Marinimicrobia bacterium UBA6931	Parks et al. (2017) Nature Microbiology	NCBI	na	DKAH00000000	na	na
Candidatus Marinimicrobia bacterium UBA6936	Parks et al. (2017) Nature Microbiology	NCBI	na	DKAC00000000	na	na
Candidatus Marinimicrobia bacterium UBA6939	Parks et al. (2017) Nature Microbiology	NCBI	na	DJZZ00000000	na	na
Candidatus Marinimicrobia bacterium UBA6947	Parks et al. (2017) Nature Microbiology	NCBI	na	DJZR00000000	na	na
Candidatus Marinimicrobia bacterium UBA7299	Parks et al. (2017) Nature Microbiology	NCBI	na	DKQV00000000	na	na
Candidatus Marinimicrobia bacterium UBA7300	Parks et al. (2017) Nature Microbiology	NCBI	na	DKQU00000000	na	na
Candidatus Marinimicrobia bacterium UBA7301	Parks et al. (2017) Nature Microbiology	NCBI	na	DKQT00000000	na	na
Candidatus Marinimicrobia bacterium UBA7303	Parks et al. (2017) Nature Microbiology	NCBI	na	DKQR00000000	na	na
Candidatus Marinimicrobia bacterium UBA7308	Parks et al. (2017) Nature Microbiology	NCBI	na	DKQM00000000	na	na
Candidatus Marinimicrobia bacterium UBA7882	Parks et al. (2017) Nature Microbiology	NCBI	na	DLRS00000000	na	na
Candidatus Microthrix sp UBA1013	Parks et al. (2017) Nature Microbiology	NCBI	na	DBAJ00000000	na	na
Candidatus Microthrix sp UBA1322	Parks et al. (2017) Nature Microbiology	NCBI	na	DBTG00000000	na	na
Candidatus Microthrix sp UBA1323	Parks et al. (2017) Nature Microbiology	NCBI	na	DBTF00000000	na	na
Candidatus Microthrix sp UBA1329	Parks et al. (2017) Nature Microbiology	NCBI	na	DBSZ00000000	na	na
Candidatus Microthrix sp UBA1522	Parks et al. (2017) Nature Microbiology	NCBI	na	DCQI00000000	na	na
Candidatus Microthrix sp UBA1616	Parks et al. (2017) Nature Microbiology	NCBI	na	DCMS00000000	na	na
Candidatus Microthrix sp UBA1617	Parks et al. (2017) Nature Microbiology	NCBI	na	DCMR00000000	na	na
Candidatus Microthrix sp UBA1665	Parks et al. (2017) Nature Microbiology	NCBI	na	DCKV00000000	na	na
Candidatus Microthrix sp UBA1676	Parks et al. (2017) Nature Microbiology	NCBI	na	DCKK00000000	na	na
Candidatus Microthrix sp UBA1677	Parks et al. (2017) Nature Microbiology	NCBI	na	DCKJ00000000	na	na
Candidatus Microthrix sp UBA1984	Parks et al. (2017) Nature Microbiology	NCBI	na	DDDI00000000	na	na
Candidatus Microthrix sp UBA2110	Parks et al. (2017) Nature Microbiology	NCBI	na	DCYM00000000	na	na
Candidatus Microthrix sp UBA2111	Parks et al. (2017) Nature Microbiology	NCBI	na	DCYL00000000	na	na
Candidatus Microthrix sp UBA2127	Parks et al. (2017) Nature Microbiology	NCBI	na	DCXV00000000	na	na
Candidatus Microthrix sp UBA2131	Parks et al. (2017) Nature Microbiology	NCBI	na	DCXR00000000	na	na
Candidatus Microthrix sp UBA2155	Parks et al. (2017) Nature Microbiology	NCBI	na	DCWT00000000	na	na
Candidatus Microthrix sp UBA2517	Parks et al. (2017) Nature Microbiology	NCBI	na	DDNP00000000	na	na
Candidatus Microthrix sp UBA2587	Parks et al. (2017) Nature Microbiology	NCBI	na	DDKX00000000	na	na
Candidatus Microthrix sp UBA2634	Parks et al. (2017) Nature Microbiology	NCBI	na	DENW00000000	na	na
Candidatus Microthrix sp UBA2635	Parks et al. (2017) Nature Microbiology	NCBI	na	DENV00000000	na	na
Candidatus Microthrix sp UBA2961	Parks et al. (2017) Nature Microbiology	NCBI	na	DEBH00000000	na	na
Candidatus Microthrix sp UBA2974	Parks et al. (2017) Nature Microbiology	NCBI	na	DEAU00000000	na	na
Candidatus Microthrix sp UBA2983	Parks et al. (2017) Nature Microbiology	NCBI	na	DEAL00000000	na	na
Candidatus Microthrix sp UBA3165	Parks et al. (2017) Nature Microbiology	NCBI	na	DEYF00000000	na	na
Candidatus Microthrix sp UBA3166	Parks et al. (2017) Nature Microbiology	NCBI	na	DEYE00000000	na	na
Candidatus Microthrix sp UBA3492	Parks et al. (2017) Nature Microbiology	NCBI	na	DFQJ00000000	na	na
Candidatus Microthrix sp UBA3493	Parks et al. (2017) Nature Microbiology	NCBI	na	DFQI00000000	na	na
Candidatus Microthrix sp UBA3506	Parks et al. (2017) Nature Microbiology	NCBI	na	DFPV00000000	na	na
Candidatus Microthrix sp UBA3507	Parks et al. (2017) Nature Microbiology	NCBI	na	DFPU00000000	na	na
Candidatus Microthrix sp UBA3508	Parks et al. (2017) Nature Microbiology	NCBI	na	DFPT00000000	na	na
Candidatus Microthrix sp UBA3522	Parks et al. (2017) Nature Microbiology	NCBI	na	DFPF00000000	na	na
Candidatus Microthrix sp UBA4143	Parks et al. (2017) Nature Microbiology	NCBI	na	DFWD00000000	na	na
Candidatus Microthrix sp UBA4144	Parks et al. (2017) Nature Microbiology	NCBI	na	DFWC00000000	na	na
Candidatus Microthrix sp UBA4147	Parks et al. (2017) Nature Microbiology	NCBI	na	DFVZ00000000	na	na
Candidatus Microthrix sp UBA4542	Parks et al. (2017) Nature Microbiology	NCBI	na	DGLO00000000	na	na
Candidatus Microthrix sp UBA5676	Parks et al. (2017) Nature Microbiology	NCBI	na	DIIG00000000	na	na
Candidatus Microthrix sp UBA5678	Parks et al. (2017) Nature Microbiology	NCBI	na	DIIE00000000	na	na
Candidatus Microthrix sp UBA6517	Parks et al. (2017) Nature Microbiology	NCBI	na	DJLL00000000	na	na
Candidatus Microthrix sp UBA6521	Parks et al. (2017) Nature Microbiology	NCBI	na	DJLH00000000	na	na
Candidatus Microthrix sp UBA6542	Parks et al. (2017) Nature Microbiology	NCBI	na	DJKM00000000	na	na
Candidatus Microthrix sp UBA6618	Parks et al. (2017) Nature Microbiology	NCBI	na	DJHO00000000	na	na
Candidatus Microthrix sp UBA670	Parks et al. (2017) Nature Microbiology	NCBI	na	DBNO00000000	na	na
Candidatus Microthrix sp UBA672	Parks et al. (2017) Nature Microbiology	NCBI	na	DBNM00000000	na	na
Candidatus Microthrix sp UBA6925	Parks et al. (2017) Nature Microbiology	NCBI	na	DKAN00000000	na	na
Candidatus Microthrix sp UBA6944	Parks et al. (2017) Nature Microbiology	NCBI	na	DJZU00000000	na	na
Candidatus Microthrix sp UBA6948	Parks et al. (2017) Nature Microbiology	NCBI	na	DJZQ00000000	na	na
Candidatus Microthrix sp UBA722	Parks et al. (2017) Nature Microbiology	NCBI	na	DBLO00000000	na	na
Candidatus Microthrix sp UBA7316	Parks et al. (2017) Nature Microbiology	NCBI	na	DKQE00000000	na	na
Candidatus Microthrix sp UBA7352	Parks et al. (2017) Nature Microbiology	NCBI	na	DKOV00000000	na	na
Candidatus Microthrix sp UBA7353	Parks et al. (2017) Nature Microbiology	NCBI	na	DKOU00000000	na	na
Candidatus Microthrix sp UBA7383	Parks et al. (2017) Nature Microbiology	NCBI	na	DKNR00000000	na	na
Candidatus Microthrix sp UBA7388	Parks et al. (2017) Nature Microbiology	NCBI	na	DKNM00000000	na	na
Candidatus Microthrix sp UBA7450	Parks et al. (2017) Nature Microbiology	NCBI	na	DLPU00000000	na	na
Candidatus Microthrix sp UBA7793	Parks et al. (2017) Nature Microbiology	NCBI	na	DLCR00000000	na	na
Candidatus Microthrix sp UBA7817	Parks et al. (2017) Nature Microbiology	NCBI	na	DLBT00000000	na	na
Candidatus Microthrix sp UBA7828	Parks et al. (2017) Nature Microbiology	NCBI	na	DLTU00000000	na	na
Candidatus Microthrix sp UBA7829	Parks et al. (2017) Nature Microbiology	NCBI	na	DLTT00000000	na	na
Candidatus Microthrix sp UBA7881	Parks et al. (2017) Nature Microbiology	NCBI	na	DLRT00000000	na	na
Candidatus Microthrix sp UBA7884	Parks et al. (2017) Nature Microbiology	NCBI	na	DLRQ00000000	na	na
Candidatus Microthrix sp UBA7886	Parks et al. (2017) Nature Microbiology	NCBI	na	DLRO00000000	na	na
Candidatus Microthrix sp UBA7895	Parks et al. (2017) Nature Microbiology	NCBI	na	DLRF00000000	na	na
Candidatus Microthrix sp UBA814	Parks et al. (2017) Nature Microbiology	NCBI	na	DBIA00000000	na	na
Candidatus Microthrix sp UBA825	Parks et al. (2017) Nature Microbiology	NCBI	na	DBHP00000000	na	na
Candidatus Microthrix sp UBA831	Parks et al. (2017) Nature Microbiology	NCBI	na	DBHJ00000000	na	na
Candidatus Microthrix sp UBA857	Parks et al. (2017) Nature Microbiology	NCBI	na	DBGJ00000000	na	na
Candidatus Microthrix sp UBA881	Parks et al. (2017) Nature Microbiology	NCBI	na	DBFL00000000	na	na
Candidatus Microthrix sp UBA886	Parks et al. (2017) Nature Microbiology	NCBI	na	DBFG00000000	na	na
Candidatus Pelagibacter sp UBA2154	Parks et al. (2017) Nature Microbiology	NCBI	na	DCWU00000000	na	na
Candidatus Peribacter sp UBA2144	Parks et al. (2017) Nature Microbiology	NCBI	na	DCXE00000000	na	na
Candidatus Peribacter sp UBA2170	Parks et al. (2017) Nature Microbiology	NCBI	na	DCWE00000000	na	na
Candidatus Peribacter sp UBA6535	Parks et al. (2017) Nature Microbiology	NCBI	na	DJKT00000000	na	na
Candidatus Peribacter sp UBA6538	Parks et al. (2017) Nature Microbiology	NCBI	na	DJKQ00000000	na	na
Candidatus Saccharibacteria bacterium UBA2112	Parks et al. (2017) Nature Microbiology	NCBI	na	DCYK00000000	na	na
Candidatus Saccharibacteria bacterium UBA4215	Parks et al. (2017) Nature Microbiology	NCBI	na	DFTJ00000000	na	na
Candidatus Saccharibacteria bacterium UBA892	Parks et al. (2017) Nature Microbiology	NCBI	na	DBFA00000000	na	na
Candidatus Woesearchaeota archaeon UBA142	Parks et al. (2017) Nature Microbiology	NCBI	na	DAWD00000000	na	na
Candidatus Woesearchaeota archaeon UBA489	Parks et al. (2017) Nature Microbiology	NCBI	na	DAVM00000000	na	na
Candidatus Woesearchaeota archaeon UBA492	Parks et al. (2017) Nature Microbiology	NCBI	na	DASK00000000	na	na
Candidatus Woesearchaeota archaeon UBA544	Parks et al. (2017) Nature Microbiology	NCBI	na	DAWZ00000000	na	na
Caulobacteraceae bacterium UBA3198	Parks et al. (2017) Nature Microbiology	NCBI	na	DEWY00000000	na	na
Caulobacteraceae bacterium UBA3608	Parks et al. (2017) Nature Microbiology	NCBI	na	DFLX00000000	na	na
Cellvibrionaceae bacterium UBA1124	Parks et al. (2017) Nature Microbiology	NCBI	na	DCAV00000000	na	na
Cellvibrionaceae bacterium UBA677	Parks et al. (2017) Nature Microbiology	NCBI	na	DBNH00000000	na	na
Cellvibrionales bacterium UBA1483	Parks et al. (2017) Nature Microbiology	NCBI	na	DCRV00000000	na	na
Cellvibrionales bacterium UBA1854	Parks et al. (2017) Nature Microbiology	NCBI	na	DDII00000000	na	na
Cellvibrionales bacterium UBA1963	Parks et al. (2017) Nature Microbiology	NCBI	na	DDED00000000	na	na
Cellvibrionales bacterium UBA1969	Parks et al. (2017) Nature Microbiology	NCBI	na	DDDX00000000	na	na
Cellvibrionales bacterium UBA2511	Parks et al. (2017) Nature Microbiology	NCBI	na	DDNV00000000	na	na
Cellvibrionales bacterium UBA2618	Parks et al. (2017) Nature Microbiology	NCBI	na	DDJS00000000	na	na
Cellvibrionales bacterium UBA7375	Parks et al. (2017) Nature Microbiology	NCBI	na	DKNZ00000000	na	na
Chloroflexi bacterium UBA6622	Parks et al. (2017) Nature Microbiology	NCBI	na	DJHK00000000	na	na
Citromicrobium sp UBA1476	Parks et al. (2017) Nature Microbiology	NCBI	na	DCSC00000000	na	na
Citromicrobium sp UBA3494	Parks et al. (2017) Nature Microbiology	NCBI	na	DFQH00000000	na	na
Cobetia sp UBA4515	Parks et al. (2017) Nature Microbiology	NCBI	na	DGMP00000000	na	na
Coxiellaceae bacterium UBA1530	Parks et al. (2017) Nature Microbiology	NCBI	na	DCQA00000000	na	na
Cyanobacteria bacterium UBA6965	Parks et al. (2017) Nature Microbiology	NCBI	na	DJYZ00000000	na	na
Cyanobacteria bacterium UBA7373	Parks et al. (2017) Nature Microbiology	NCBI	na	DKOB00000000	na	na
Dehalococcoidia bacterium UBA1122	Parks et al. (2017) Nature Microbiology	NCBI	na	DCAX00000000	na	na
Dehalococcoidia bacterium UBA1123	Parks et al. (2017) Nature Microbiology	NCBI	na	DCAW00000000	na	na
Dehalococcoidia bacterium UBA1127	Parks et al. (2017) Nature Microbiology	NCBI	na	DCAS00000000	na	na
Dehalococcoidia bacterium UBA1327	Parks et al. (2017) Nature Microbiology	NCBI	na	DBTB00000000	na	na
Dehalococcoidia bacterium UBA1328	Parks et al. (2017) Nature Microbiology	NCBI	na	DBTA00000000	na	na
Dehalococcoidia bacterium UBA1332	Parks et al. (2017) Nature Microbiology	NCBI	na	DBSW00000000	na	na
Dehalococcoidia bacterium UBA1657	Parks et al. (2017) Nature Microbiology	NCBI	na	DCLD00000000	na	na
Dehalococcoidia bacterium UBA2141	Parks et al. (2017) Nature Microbiology	NCBI	na	DCXH00000000	na	na
Dehalococcoidia bacterium UBA2145	Parks et al. (2017) Nature Microbiology	NCBI	na	DCXD00000000	na	na
Dehalococcoidia bacterium UBA2158	Parks et al. (2017) Nature Microbiology	NCBI	na	DCWQ00000000	na	na
Dehalococcoidia bacterium UBA2160	Parks et al. (2017) Nature Microbiology	NCBI	na	DCWO00000000	na	na
Dehalococcoidia bacterium UBA2162	Parks et al. (2017) Nature Microbiology	NCBI	na	DCWM00000000	na	na
Dehalococcoidia bacterium UBA2588	Parks et al. (2017) Nature Microbiology	NCBI	na	DDKW00000000	na	na
Dehalococcoidia bacterium UBA2962	Parks et al. (2017) Nature Microbiology	NCBI	na	DEBG00000000	na	na
Dehalococcoidia bacterium UBA2963	Parks et al. (2017) Nature Microbiology	NCBI	na	DEBF00000000	na	na
Dehalococcoidia bacterium UBA2976	Parks et al. (2017) Nature Microbiology	NCBI	na	DEAS00000000	na	na
Dehalococcoidia bacterium UBA2978	Parks et al. (2017) Nature Microbiology	NCBI	na	DEAQ00000000	na	na
Dehalococcoidia bacterium UBA2979	Parks et al. (2017) Nature Microbiology	NCBI	na	DEAP00000000	na	na
Dehalococcoidia bacterium UBA2985	Parks et al. (2017) Nature Microbiology	NCBI	na	DEAJ00000000	na	na
Dehalococcoidia bacterium UBA2991	Parks et al. (2017) Nature Microbiology	NCBI	na	DEAD00000000	na	na
Dehalococcoidia bacterium UBA3495	Parks et al. (2017) Nature Microbiology	NCBI	na	DFQG00000000	na	na
Dehalococcoidia bacterium UBA3509	Parks et al. (2017) Nature Microbiology	NCBI	na	DFPS00000000	na	na
Dehalococcoidia bacterium UBA5164	Parks et al. (2017) Nature Microbiology	NCBI	na	DHXE00000000	na	na
Dehalococcoidia bacterium UBA6495	Parks et al. (2017) Nature Microbiology	NCBI	na	DJMH00000000	na	na
Dehalococcoidia bacterium UBA6520	Parks et al. (2017) Nature Microbiology	NCBI	na	DJLI00000000	na	na
Dehalococcoidia bacterium UBA6537	Parks et al. (2017) Nature Microbiology	NCBI	na	DJKR00000000	na	na
Dehalococcoidia bacterium UBA6627	Parks et al. (2017) Nature Microbiology	NCBI	na	DKLZ00000000	na	na
Dehalococcoidia bacterium UBA6629	Parks et al. (2017) Nature Microbiology	NCBI	na	DKLX00000000	na	na
Dehalococcoidia bacterium UBA6926	Parks et al. (2017) Nature Microbiology	NCBI	na	DKAM00000000	na	na
Dehalococcoidia bacterium UBA6927	Parks et al. (2017) Nature Microbiology	NCBI	na	DKAL00000000	na	na
Dehalococcoidia bacterium UBA6950	Parks et al. (2017) Nature Microbiology	NCBI	na	DJZO00000000	na	na
Dehalococcoidia bacterium UBA6951	Parks et al. (2017) Nature Microbiology	NCBI	na	DJZN00000000	na	na
Dehalococcoidia bacterium UBA6952	Parks et al. (2017) Nature Microbiology	NCBI	na	DJZM00000000	na	na
Dehalococcoidia bacterium UBA6953	Parks et al. (2017) Nature Microbiology	NCBI	na	DJZL00000000	na	na
Dehalococcoidia bacterium UBA6955	Parks et al. (2017) Nature Microbiology	NCBI	na	DJZJ00000000	na	na
Dehalococcoidia bacterium UBA6956	Parks et al. (2017) Nature Microbiology	NCBI	na	DJZI00000000	na	na
Dehalococcoidia bacterium UBA7386	Parks et al. (2017) Nature Microbiology	NCBI	na	DKNO00000000	na	na
Dehalococcoidia bacterium UBA7822	Parks et al. (2017) Nature Microbiology	NCBI	na	DLBO00000000	na	na
Dehalococcoidia bacterium UBA7823	Parks et al. (2017) Nature Microbiology	NCBI	na	DLBN00000000	na	na
Dehalococcoidia bacterium UBA7832	Parks et al. (2017) Nature Microbiology	NCBI	na	DLTQ00000000	na	na
Dehalococcoidia bacterium UBA7833	Parks et al. (2017) Nature Microbiology	NCBI	na	DLTP00000000	na	na
Dehalococcoidia bacterium UBA7834	Parks et al. (2017) Nature Microbiology	NCBI	na	DLTO00000000	na	na
Dehalococcoidia bacterium UBA7891	Parks et al. (2017) Nature Microbiology	NCBI	na	DLRJ00000000	na	na
Dehalococcoidia bacterium UBA7894	Parks et al. (2017) Nature Microbiology	NCBI	na	DLRG00000000	na	na
Dehalococcoidia bacterium UBA826	Parks et al. (2017) Nature Microbiology	NCBI	na	DBHO00000000	na	na
Deinococcaceae bacterium UBA6957	Parks et al. (2017) Nature Microbiology	NCBI	na	DJZH00000000	na	na
Deltaproteobacteria bacterium UBA1014	Parks et al. (2017) Nature Microbiology	NCBI	na	DBAI00000000	na	na
Deltaproteobacteria bacterium UBA1121	Parks et al. (2017) Nature Microbiology	NCBI	na	DCAY00000000	na	na
Deltaproteobacteria bacterium UBA2138	Parks et al. (2017) Nature Microbiology	NCBI	na	DCXK00000000	na	na
Deltaproteobacteria bacterium UBA2159	Parks et al. (2017) Nature Microbiology	NCBI	na	DCWP00000000	na	na
Deltaproteobacteria bacterium UBA2957	Parks et al. (2017) Nature Microbiology	NCBI	na	DEBL00000000	na	na
Deltaproteobacteria bacterium UBA5684	Parks et al. (2017) Nature Microbiology	NCBI	na	DIHY00000000	na	na
Deltaproteobacteria bacterium UBA6601	Parks et al. (2017) Nature Microbiology	NCBI	na	DJIF00000000	na	na
Deltaproteobacteria bacterium UBA6930	Parks et al. (2017) Nature Microbiology	NCBI	na	DKAI00000000	na	na
Deltaproteobacteria bacterium UBA6967	Parks et al. (2017) Nature Microbiology	NCBI	na	DJYX00000000	na	na
Deltaproteobacteria bacterium UBA7892	Parks et al. (2017) Nature Microbiology	NCBI	na	DLRI00000000	na	na
Desulfobacteraceae bacterium UBA2130	Parks et al. (2017) Nature Microbiology	NCBI	na	DCXS00000000	na	na
Desulfobacteraceae bacterium UBA2156	Parks et al. (2017) Nature Microbiology	NCBI	na	DCWS00000000	na	na
Desulfobacteraceae bacterium UBA5681	Parks et al. (2017) Nature Microbiology	NCBI	na	DIIB00000000	na	na
Desulfovibrio sp UBA1335	Parks et al. (2017) Nature Microbiology	NCBI	na	DBST00000000	na	na
Desulfovibrio sp UBA728	Parks et al. (2017) Nature Microbiology	NCBI	na	DBLI00000000	na	na
Desulfovibrio sp UBA7315	Parks et al. (2017) Nature Microbiology	NCBI	na	DKQF00000000	na	na
Erythrobacteraceae bacterium UBA1460	Parks et al. (2017) Nature Microbiology	NCBI	na	DCSS00000000	na	na
Erythrobacteraceae bacterium UBA2640	Parks et al. (2017) Nature Microbiology	NCBI	na	DENQ00000000	na	na
Erythrobacteraceae bacterium UBA3164	Parks et al. (2017) Nature Microbiology	NCBI	na	DEYG00000000	na	na
Erythrobacteraceae bacterium UBA3365	Parks et al. (2017) Nature Microbiology	NCBI	na	DEQN00000000	na	na
Erythrobacteraceae bacterium UBA3525	Parks et al. (2017) Nature Microbiology	NCBI	na	DFPC00000000	na	na
Erythrobacteraceae bacterium UBA3609	Parks et al. (2017) Nature Microbiology	NCBI	na	DFLW00000000	na	na
Erythrobacteraceae bacterium UBA4503	Parks et al. (2017) Nature Microbiology	NCBI	na	DGNB00000000	na	na
Erythrobacteraceae bacterium UBA4528	Parks et al. (2017) Nature Microbiology	NCBI	na	DGMC00000000	na	na
Erythrobacteraceae bacterium UBA5049	Parks et al. (2017) Nature Microbiology	NCBI	na	DIBP00000000	na	na
Erythrobacteraceae bacterium UBA5093	Parks et al. (2017) Nature Microbiology	NCBI	na	DHZX00000000	na	na
Erythrobacter sp UBA1916	Parks et al. (2017) Nature Microbiology	NCBI	na	DDFY00000000	na	na
Erythrobacter sp UBA2510	Parks et al. (2017) Nature Microbiology	NCBI	na	DDNW00000000	na	na
Euryarchaeota archaeon UBA100	Parks et al. (2017) Nature Microbiology	NCBI	na	DAIU00000000	na	na
Euryarchaeota archaeon UBA101	Parks et al. (2017) Nature Microbiology	NCBI	na	DAHK00000000	na	na
Euryarchaeota archaeon UBA102	Parks et al. (2017) Nature Microbiology	NCBI	na	DAHL00000000	na	na
Euryarchaeota archaeon UBA103	Parks et al. (2017) Nature Microbiology	NCBI	na	DAYH00000000	na	na
Euryarchaeota archaeon UBA104	Parks et al. (2017) Nature Microbiology	NCBI	na	DALU00000000	na	na
Euryarchaeota archaeon UBA105	Parks et al. (2017) Nature Microbiology	NCBI	na	DALV00000000	na	na
Euryarchaeota archaeon UBA106	Parks et al. (2017) Nature Microbiology	NCBI	na	DAOJ00000000	na	na
Euryarchaeota archaeon UBA107	Parks et al. (2017) Nature Microbiology	NCBI	na	DATT00000000	na	na
Euryarchaeota archaeon UBA108	Parks et al. (2017) Nature Microbiology	NCBI	na	DASY00000000	na	na
Euryarchaeota archaeon UBA109	Parks et al. (2017) Nature Microbiology	NCBI	na	DADJ00000000	na	na
Euryarchaeota archaeon UBA10	Parks et al. (2017) Nature Microbiology	NCBI	na	DAGO00000000	na	na
Euryarchaeota archaeon UBA110	Parks et al. (2017) Nature Microbiology	NCBI	na	DAXL00000000	na	na
Euryarchaeota archaeon UBA111	Parks et al. (2017) Nature Microbiology	NCBI	na	DAWS00000000	na	na
Euryarchaeota archaeon UBA112	Parks et al. (2017) Nature Microbiology	NCBI	na	DAUT00000000	na	na
Euryarchaeota archaeon UBA11	Parks et al. (2017) Nature Microbiology	NCBI	na	DADV00000000	na	na
Euryarchaeota archaeon UBA120	Parks et al. (2017) Nature Microbiology	NCBI	na	DAUE00000000	na	na
Euryarchaeota archaeon UBA121	Parks et al. (2017) Nature Microbiology	NCBI	na	DANL00000000	na	na
Euryarchaeota archaeon UBA122	Parks et al. (2017) Nature Microbiology	NCBI	na	DANM00000000	na	na
Euryarchaeota archaeon UBA123	Parks et al. (2017) Nature Microbiology	NCBI	na	DAOZ00000000	na	na
Euryarchaeota archaeon UBA124	Parks et al. (2017) Nature Microbiology	NCBI	na	DAPT00000000	na	na
Euryarchaeota archaeon UBA125	Parks et al. (2017) Nature Microbiology	NCBI	na	DAPV00000000	na	na
Euryarchaeota archaeon UBA126	Parks et al. (2017) Nature Microbiology	NCBI	na	DAMG00000000	na	na
Euryarchaeota archaeon UBA127	Parks et al. (2017) Nature Microbiology	NCBI	na	DAPK00000000	na	na
Euryarchaeota archaeon UBA128	Parks et al. (2017) Nature Microbiology	NCBI	na	DALZ00000000	na	na
Euryarchaeota archaeon UBA129	Parks et al. (2017) Nature Microbiology	NCBI	na	DAWT00000000	na	na
Euryarchaeota archaeon UBA12	Parks et al. (2017) Nature Microbiology	NCBI	na	DADW00000000	na	na
Euryarchaeota archaeon UBA130	Parks et al. (2017) Nature Microbiology	NCBI	na	DAVY00000000	na	na
Euryarchaeota archaeon UBA131	Parks et al. (2017) Nature Microbiology	NCBI	na	DAOU00000000	na	na
Euryarchaeota archaeon UBA136	Parks et al. (2017) Nature Microbiology	NCBI	na	DAXQ00000000	na	na
Euryarchaeota archaeon UBA137	Parks et al. (2017) Nature Microbiology	NCBI	na	DAQL00000000	na	na
Euryarchaeota archaeon UBA138	Parks et al. (2017) Nature Microbiology	NCBI	na	DAIM00000000	na	na
Euryarchaeota archaeon UBA139	Parks et al. (2017) Nature Microbiology	NCBI	na	DAEO00000000	na	na
Euryarchaeota archaeon UBA13	Parks et al. (2017) Nature Microbiology	NCBI	na	DAHU00000000	na	na
Euryarchaeota archaeon UBA14	Parks et al. (2017) Nature Microbiology	NCBI	na	DAOK00000000	na	na
Euryarchaeota archaeon UBA15	Parks et al. (2017) Nature Microbiology	NCBI	na	DAEW00000000	na	na
Euryarchaeota archaeon UBA169	Parks et al. (2017) Nature Microbiology	NCBI	na	DAEH00000000	na	na
Euryarchaeota archaeon UBA16	Parks et al. (2017) Nature Microbiology	NCBI	na	DATK00000000	na	na
Euryarchaeota archaeon UBA170	Parks et al. (2017) Nature Microbiology	NCBI	na	DALF00000000	na	na
Euryarchaeota archaeon UBA171	Parks et al. (2017) Nature Microbiology	NCBI	na	DANO00000000	na	na
Euryarchaeota archaeon UBA173	Parks et al. (2017) Nature Microbiology	NCBI	na	DAJH00000000	na	na
Euryarchaeota archaeon UBA174	Parks et al. (2017) Nature Microbiology	NCBI	na	DAFE00000000	na	na
Euryarchaeota archaeon UBA175	Parks et al. (2017) Nature Microbiology	NCBI	na	DAFD00000000	na	na
Euryarchaeota archaeon UBA177	Parks et al. (2017) Nature Microbiology	NCBI	na	DAZH00000000	na	na
Euryarchaeota archaeon UBA178	Parks et al. (2017) Nature Microbiology	NCBI	na	DALT00000000	na	na
Euryarchaeota archaeon UBA179	Parks et al. (2017) Nature Microbiology	NCBI	na	DADS00000000	na	na
Euryarchaeota archaeon UBA17	Parks et al. (2017) Nature Microbiology	NCBI	na	DATH00000000	na	na
Euryarchaeota archaeon UBA180	Parks et al. (2017) Nature Microbiology	NCBI	na	DAWC00000000	na	na
Euryarchaeota archaeon UBA181	Parks et al. (2017) Nature Microbiology	NCBI	na	DALI00000000	na	na
Euryarchaeota archaeon UBA182	Parks et al. (2017) Nature Microbiology	NCBI	na	DAGH00000000	na	na
Euryarchaeota archaeon UBA18	Parks et al. (2017) Nature Microbiology	NCBI	na	DAEA00000000	na	na
Euryarchaeota archaeon UBA191	Parks et al. (2017) Nature Microbiology	NCBI	na	DAFC00000000	na	na
Euryarchaeota archaeon UBA192	Parks et al. (2017) Nature Microbiology	NCBI	na	DATX00000000	na	na
Euryarchaeota archaeon UBA193	Parks et al. (2017) Nature Microbiology	NCBI	na	DASI00000000	na	na
Euryarchaeota archaeon UBA194	Parks et al. (2017) Nature Microbiology	NCBI	na	DAID00000000	na	na
Euryarchaeota archaeon UBA195	Parks et al. (2017) Nature Microbiology	NCBI	na	DAVE00000000	na	na
Euryarchaeota archaeon UBA196	Parks et al. (2017) Nature Microbiology	NCBI	na	DAMA00000000	na	na
Euryarchaeota archaeon UBA197	Parks et al. (2017) Nature Microbiology	NCBI	na	DAXR00000000	na	na
Euryarchaeota archaeon UBA198	Parks et al. (2017) Nature Microbiology	NCBI	na	DALP00000000	na	na
Euryarchaeota archaeon UBA199	Parks et al. (2017) Nature Microbiology	NCBI	na	DAPI00000000	na	na
Euryarchaeota archaeon UBA19	Parks et al. (2017) Nature Microbiology	NCBI	na	DAPQ00000000	na	na
Euryarchaeota archaeon UBA200	Parks et al. (2017) Nature Microbiology	NCBI	na	DAWP00000000	na	na
Euryarchaeota archaeon UBA20	Parks et al. (2017) Nature Microbiology	NCBI	na	DAPP00000000	na	na
Euryarchaeota archaeon UBA214	Parks et al. (2017) Nature Microbiology	NCBI	na	DAPD00000000	na	na
Euryarchaeota archaeon UBA215	Parks et al. (2017) Nature Microbiology	NCBI	na	DAPX00000000	na	na
Euryarchaeota archaeon UBA21	Parks et al. (2017) Nature Microbiology	NCBI	na	DAFI00000000	na	na
Euryarchaeota archaeon UBA220	Parks et al. (2017) Nature Microbiology	NCBI	na	DAON00000000	na	na
Euryarchaeota archaeon UBA221	Parks et al. (2017) Nature Microbiology	NCBI	na	DAHT00000000	na	na
Euryarchaeota archaeon UBA222	Parks et al. (2017) Nature Microbiology	NCBI	na	DASF00000000	na	na
Euryarchaeota archaeon UBA224	Parks et al. (2017) Nature Microbiology	NCBI	na	DASD00000000	na	na
Euryarchaeota archaeon UBA225	Parks et al. (2017) Nature Microbiology	NCBI	na	DAMW00000000	na	na
Euryarchaeota archaeon UBA226	Parks et al. (2017) Nature Microbiology	NCBI	na	DAWL00000000	na	na
Euryarchaeota archaeon UBA227	Parks et al. (2017) Nature Microbiology	NCBI	na	DALX00000000	na	na
Euryarchaeota archaeon UBA228	Parks et al. (2017) Nature Microbiology	NCBI	na	DAHD00000000	na	na
Euryarchaeota archaeon UBA229	Parks et al. (2017) Nature Microbiology	NCBI	na	DAUW00000000	na	na
Euryarchaeota archaeon UBA22	Parks et al. (2017) Nature Microbiology	NCBI	na	DAXM00000000	na	na
Euryarchaeota archaeon UBA23	Parks et al. (2017) Nature Microbiology	NCBI	na	DAIJ00000000	na	na
Euryarchaeota archaeon UBA249	Parks et al. (2017) Nature Microbiology	NCBI	na	DAXA00000000	na	na
Euryarchaeota archaeon UBA24	Parks et al. (2017) Nature Microbiology	NCBI	na	DASO00000000	na	na
Euryarchaeota archaeon UBA250	Parks et al. (2017) Nature Microbiology	NCBI	na	DATW00000000	na	na
Euryarchaeota archaeon UBA251	Parks et al. (2017) Nature Microbiology	NCBI	na	DAFJ00000000	na	na
Euryarchaeota archaeon UBA252	Parks et al. (2017) Nature Microbiology	NCBI	na	DAQN00000000	na	na
Euryarchaeota archaeon UBA253	Parks et al. (2017) Nature Microbiology	NCBI	na	DANF00000000	na	na
Euryarchaeota archaeon UBA25	Parks et al. (2017) Nature Microbiology	NCBI	na	DARV00000000	na	na
Euryarchaeota archaeon UBA26	Parks et al. (2017) Nature Microbiology	NCBI	na	DANV00000000	na	na
Euryarchaeota archaeon UBA27	Parks et al. (2017) Nature Microbiology	NCBI	na	DANT00000000	na	na
Euryarchaeota archaeon UBA28	Parks et al. (2017) Nature Microbiology	NCBI	na	DANW00000000	na	na
Euryarchaeota archaeon UBA34	Parks et al. (2017) Nature Microbiology	NCBI	na	DALJ00000000	na	na
Euryarchaeota archaeon UBA35	Parks et al. (2017) Nature Microbiology	NCBI	na	DAGT00000000	na	na
Euryarchaeota archaeon UBA36	Parks et al. (2017) Nature Microbiology	NCBI	na	DAJW00000000	na	na
Euryarchaeota archaeon UBA38	Parks et al. (2017) Nature Microbiology	NCBI	na	DAGP00000000	na	na
Euryarchaeota archaeon UBA39	Parks et al. (2017) Nature Microbiology	NCBI	na	DAQW00000000	na	na
Euryarchaeota archaeon UBA3	Parks et al. (2017) Nature Microbiology	NCBI	na	DAMY00000000	na	na
Euryarchaeota archaeon UBA40	Parks et al. (2017) Nature Microbiology	NCBI	na	DAYJ00000000	na	na
Euryarchaeota archaeon UBA41	Parks et al. (2017) Nature Microbiology	NCBI	na	DADQ00000000	na	na
Euryarchaeota archaeon UBA438	Parks et al. (2017) Nature Microbiology	NCBI	na	DAQP00000000	na	na
Euryarchaeota archaeon UBA439	Parks et al. (2017) Nature Microbiology	NCBI	na	DANB00000000	na	na
Euryarchaeota archaeon UBA440	Parks et al. (2017) Nature Microbiology	NCBI	na	DAWQ00000000	na	na
Euryarchaeota archaeon UBA441	Parks et al. (2017) Nature Microbiology	NCBI	na	DARJ00000000	na	na
Euryarchaeota archaeon UBA442	Parks et al. (2017) Nature Microbiology	NCBI	na	DAKR00000000	na	na
Euryarchaeota archaeon UBA443	Parks et al. (2017) Nature Microbiology	NCBI	na	DAKS00000000	na	na
Euryarchaeota archaeon UBA484	Parks et al. (2017) Nature Microbiology	NCBI	na	DAEM00000000	na	na
Euryarchaeota archaeon UBA485	Parks et al. (2017) Nature Microbiology	NCBI	na	DAEL00000000	na	na
Euryarchaeota archaeon UBA486	Parks et al. (2017) Nature Microbiology	NCBI	na	DAET00000000	na	na
Euryarchaeota archaeon UBA487	Parks et al. (2017) Nature Microbiology	NCBI	na	DAVU00000000	na	na
Euryarchaeota archaeon UBA488	Parks et al. (2017) Nature Microbiology	NCBI	na	DAZP00000000	na	na
Euryarchaeota archaeon UBA491	Parks et al. (2017) Nature Microbiology	NCBI	na	DAOO00000000	na	na
Euryarchaeota archaeon UBA494	Parks et al. (2017) Nature Microbiology	NCBI	na	DAMD00000000	na	na
Euryarchaeota archaeon UBA495	Parks et al. (2017) Nature Microbiology	NCBI	na	DALQ00000000	na	na
Euryarchaeota archaeon UBA496	Parks et al. (2017) Nature Microbiology	NCBI	na	DASG00000000	na	na
Euryarchaeota archaeon UBA497	Parks et al. (2017) Nature Microbiology	NCBI	na	DADE00000000	na	na
Euryarchaeota archaeon UBA498	Parks et al. (2017) Nature Microbiology	NCBI	na	DADB00000000	na	na
Euryarchaeota archaeon UBA499	Parks et al. (2017) Nature Microbiology	NCBI	na	DAMJ00000000	na	na
Euryarchaeota archaeon UBA49	Parks et al. (2017) Nature Microbiology	NCBI	na	DAUA00000000	na	na
Euryarchaeota archaeon UBA4	Parks et al. (2017) Nature Microbiology	NCBI	na	DAFQ00000000	na	na
Euryarchaeota archaeon UBA500	Parks et al. (2017) Nature Microbiology	NCBI	na	DAXH00000000	na	na
Euryarchaeota archaeon UBA501	Parks et al. (2017) Nature Microbiology	NCBI	na	DAVT00000000	na	na
Euryarchaeota archaeon UBA502	Parks et al. (2017) Nature Microbiology	NCBI	na	DAPG00000000	na	na
Euryarchaeota archaeon UBA503	Parks et al. (2017) Nature Microbiology	NCBI	na	DAEJ00000000	na	na
Euryarchaeota archaeon UBA50	Parks et al. (2017) Nature Microbiology	NCBI	na	DASJ00000000	na	na
Euryarchaeota archaeon UBA51	Parks et al. (2017) Nature Microbiology	NCBI	na	DAOQ00000000	na	na
Euryarchaeota archaeon UBA529	Parks et al. (2017) Nature Microbiology	NCBI	na	DAZL00000000	na	na
Euryarchaeota archaeon UBA52	Parks et al. (2017) Nature Microbiology	NCBI	na	DAVB00000000	na	na
Euryarchaeota archaeon UBA530	Parks et al. (2017) Nature Microbiology	NCBI	na	DAOF00000000	na	na
Euryarchaeota archaeon UBA531	Parks et al. (2017) Nature Microbiology	NCBI	na	DAMQ00000000	na	na
Euryarchaeota archaeon UBA538	Parks et al. (2017) Nature Microbiology	NCBI	na	DALC00000000	na	na
Euryarchaeota archaeon UBA53	Parks et al. (2017) Nature Microbiology	NCBI	na	DAZU00000000	na	na
Euryarchaeota archaeon UBA540	Parks et al. (2017) Nature Microbiology	NCBI	na	DATV00000000	na	na
Euryarchaeota archaeon UBA542	Parks et al. (2017) Nature Microbiology	NCBI	na	DAOA00000000	na	na
Euryarchaeota archaeon UBA545	Parks et al. (2017) Nature Microbiology	NCBI	na	DAYC00000000	na	na
Euryarchaeota archaeon UBA546	Parks et al. (2017) Nature Microbiology	NCBI	na	DAJI00000000	na	na
Euryarchaeota archaeon UBA547	Parks et al. (2017) Nature Microbiology	NCBI	na	DACW00000000	na	na
Euryarchaeota archaeon UBA548	Parks et al. (2017) Nature Microbiology	NCBI	na	DACX00000000	na	na
Euryarchaeota archaeon UBA549	Parks et al. (2017) Nature Microbiology	NCBI	na	DAGF00000000	na	na
Euryarchaeota archaeon UBA54	Parks et al. (2017) Nature Microbiology	NCBI	na	DAGM00000000	na	na
Euryarchaeota archaeon UBA550	Parks et al. (2017) Nature Microbiology	NCBI	na	DAYA00000000	na	na
Euryarchaeota archaeon UBA551	Parks et al. (2017) Nature Microbiology	NCBI	na	DAYB00000000	na	na
Euryarchaeota archaeon UBA552	Parks et al. (2017) Nature Microbiology	NCBI	na	DAMH00000000	na	na
Euryarchaeota archaeon UBA553	Parks et al. (2017) Nature Microbiology	NCBI	na	DACD00000000	na	na
Euryarchaeota archaeon UBA554	Parks et al. (2017) Nature Microbiology	NCBI	na	DAMP00000000	na	na
Euryarchaeota archaeon UBA555	Parks et al. (2017) Nature Microbiology	NCBI	na	DATU00000000	na	na
Euryarchaeota archaeon UBA558	Parks et al. (2017) Nature Microbiology	NCBI	na	DAZE00000000	na	na
Euryarchaeota archaeon UBA559	Parks et al. (2017) Nature Microbiology	NCBI	na	DAZG00000000	na	na
Euryarchaeota archaeon UBA560	Parks et al. (2017) Nature Microbiology	NCBI	na	DANQ00000000	na	na
Euryarchaeota archaeon UBA561	Parks et al. (2017) Nature Microbiology	NCBI	na	DANX00000000	na	na
Euryarchaeota archaeon UBA562	Parks et al. (2017) Nature Microbiology	NCBI	na	DAST00000000	na	na
Euryarchaeota archaeon UBA563	Parks et al. (2017) Nature Microbiology	NCBI	na	DARR00000000	na	na
Euryarchaeota archaeon UBA584	Parks et al. (2017) Nature Microbiology	NCBI	na	DATL00000000	na	na
Euryarchaeota archaeon UBA595	Parks et al. (2017) Nature Microbiology	NCBI	na	DAGZ00000000	na	na
Euryarchaeota archaeon UBA596	Parks et al. (2017) Nature Microbiology	NCBI	na	DAGQ00000000	na	na
Euryarchaeota archaeon UBA597	Parks et al. (2017) Nature Microbiology	NCBI	na	DAOD00000000	na	na
Euryarchaeota archaeon UBA598	Parks et al. (2017) Nature Microbiology	NCBI	na	DAZD00000000	na	na
Euryarchaeota archaeon UBA599	Parks et al. (2017) Nature Microbiology	NCBI	na	DAEX00000000	na	na
Euryarchaeota archaeon UBA600	Parks et al. (2017) Nature Microbiology	NCBI	na	DATF00000000	na	na
Euryarchaeota archaeon UBA601	Parks et al. (2017) Nature Microbiology	NCBI	na	DALB00000000	na	na
Euryarchaeota archaeon UBA602	Parks et al. (2017) Nature Microbiology	NCBI	na	DAHO00000000	na	na
Euryarchaeota archaeon UBA603	Parks et al. (2017) Nature Microbiology	NCBI	na	DADF00000000	na	na
Euryarchaeota archaeon UBA604	Parks et al. (2017) Nature Microbiology	NCBI	na	DATZ00000000	na	na
Euryarchaeota archaeon UBA605	Parks et al. (2017) Nature Microbiology	NCBI	na	DATY00000000	na	na
Euryarchaeota archaeon UBA606	Parks et al. (2017) Nature Microbiology	NCBI	na	DAOP00000000	na	na
Euryarchaeota archaeon UBA607	Parks et al. (2017) Nature Microbiology	NCBI	na	DANE00000000	na	na
Euryarchaeota archaeon UBA608	Parks et al. (2017) Nature Microbiology	NCBI	na	DAPS00000000	na	na
Euryarchaeota archaeon UBA609	Parks et al. (2017) Nature Microbiology	NCBI	na	DANK00000000	na	na
Euryarchaeota archaeon UBA610	Parks et al. (2017) Nature Microbiology	NCBI	na	DAPY00000000	na	na
Euryarchaeota archaeon UBA618	Parks et al. (2017) Nature Microbiology	NCBI	na	DAVA00000000	na	na
Euryarchaeota archaeon UBA619	Parks et al. (2017) Nature Microbiology	NCBI	na	DAJJ00000000	na	na
Euryarchaeota archaeon UBA620	Parks et al. (2017) Nature Microbiology	NCBI	na	DAFA00000000	na	na
Euryarchaeota archaeon UBA621	Parks et al. (2017) Nature Microbiology	NCBI	na	DAKL00000000	na	na
Euryarchaeota archaeon UBA622	Parks et al. (2017) Nature Microbiology	NCBI	na	DADL00000000	na	na
Euryarchaeota archaeon UBA623	Parks et al. (2017) Nature Microbiology	NCBI	na	DAUV00000000	na	na
Euryarchaeota archaeon UBA62	Parks et al. (2017) Nature Microbiology	NCBI	na	DAPJ00000000	na	na
Euryarchaeota archaeon UBA63	Parks et al. (2017) Nature Microbiology	NCBI	na	DACZ00000000	na	na
Euryarchaeota archaeon UBA66	Parks et al. (2017) Nature Microbiology	NCBI	na	DAIS00000000	na	na
Euryarchaeota archaeon UBA67	Parks et al. (2017) Nature Microbiology	NCBI	na	DAKZ00000000	na	na
Euryarchaeota archaeon UBA68	Parks et al. (2017) Nature Microbiology	NCBI	na	DAMT00000000	na	na
Euryarchaeota archaeon UBA69	Parks et al. (2017) Nature Microbiology	NCBI	na	DAMZ00000000	na	na
Euryarchaeota archaeon UBA82	Parks et al. (2017) Nature Microbiology	NCBI	na	DAKQ00000000	na	na
Euryarchaeota archaeon UBA83	Parks et al. (2017) Nature Microbiology	NCBI	na	DAUM00000000	na	na
Euryarchaeota archaeon UBA84	Parks et al. (2017) Nature Microbiology	NCBI	na	DAGV00000000	na	na
Euryarchaeota archaeon UBA85	Parks et al. (2017) Nature Microbiology	NCBI	na	DAIQ00000000	na	na
Euryarchaeota archaeon UBA86	Parks et al. (2017) Nature Microbiology	NCBI	na	DAQX00000000	na	na
Euryarchaeota archaeon UBA87	Parks et al. (2017) Nature Microbiology	NCBI	na	DAGL00000000	na	na
Euryarchaeota archaeon UBA88	Parks et al. (2017) Nature Microbiology	NCBI	na	DAME00000000	na	na
Euryarchaeota archaeon UBA89	Parks et al. (2017) Nature Microbiology	NCBI	na	DAFS00000000	na	na
Euryarchaeota archaeon UBA90	Parks et al. (2017) Nature Microbiology	NCBI	na	DACK00000000	na	na
Euryarchaeota archaeon UBA91	Parks et al. (2017) Nature Microbiology	NCBI	na	DAMU00000000	na	na
Euryarchaeota archaeon UBA98	Parks et al. (2017) Nature Microbiology	NCBI	na	DAZN00000000	na	na
Euryarchaeota archaeon UBA99	Parks et al. (2017) Nature Microbiology	NCBI	na	DANG00000000	na	na
Euryarchaeota archaeon UBA9	Parks et al. (2017) Nature Microbiology	NCBI	na	DANH00000000	na	na
Flammeovirgaceae bacterium UBA1954	Parks et al. (2017) Nature Microbiology	NCBI	na	DDEM00000000	na	na
Flammeovirgaceae bacterium UBA7231	Parks et al. (2017) Nature Microbiology	NCBI	na	DKTL00000000	na	na
Flammeovirgaceae bacterium UBA7330	Parks et al. (2017) Nature Microbiology	NCBI	na	DKPQ00000000	na	na
Flavobacteriaceae bacterium UBA1005	Parks et al. (2017) Nature Microbiology	NCBI	na	DBAR00000000	na	na
Flavobacteriaceae bacterium UBA1008	Parks et al. (2017) Nature Microbiology	NCBI	na	DBAO00000000	na	na
Flavobacteriaceae bacterium UBA1115	Parks et al. (2017) Nature Microbiology	NCBI	na	DCBE00000000	na	na
Flavobacteriaceae bacterium UBA1473	Parks et al. (2017) Nature Microbiology	NCBI	na	DCSF00000000	na	na
Flavobacteriaceae bacterium UBA1519	Parks et al. (2017) Nature Microbiology	NCBI	na	DCQL00000000	na	na
Flavobacteriaceae bacterium UBA1523	Parks et al. (2017) Nature Microbiology	NCBI	na	DCQH00000000	na	na
Flavobacteriaceae bacterium UBA1658	Parks et al. (2017) Nature Microbiology	NCBI	na	DCLC00000000	na	na
Flavobacteriaceae bacterium UBA1903	Parks et al. (2017) Nature Microbiology	NCBI	na	DDGL00000000	na	na
Flavobacteriaceae bacterium UBA1927	Parks et al. (2017) Nature Microbiology	NCBI	na	DDFN00000000	na	na
Flavobacteriaceae bacterium UBA1978	Parks et al. (2017) Nature Microbiology	NCBI	na	DDDO00000000	na	na
Flavobacteriaceae bacterium UBA2639	Parks et al. (2017) Nature Microbiology	NCBI	na	DENR00000000	na	na
Flavobacteriaceae bacterium UBA2674	Parks et al. (2017) Nature Microbiology	NCBI	na	DEMI00000000	na	na
Flavobacteriaceae bacterium UBA2677	Parks et al. (2017) Nature Microbiology	NCBI	na	DEMF00000000	na	na
Flavobacteriaceae bacterium UBA3159	Parks et al. (2017) Nature Microbiology	NCBI	na	DEYL00000000	na	na
Flavobacteriaceae bacterium UBA3168	Parks et al. (2017) Nature Microbiology	NCBI	na	DEYC00000000	na	na
Flavobacteriaceae bacterium UBA3179	Parks et al. (2017) Nature Microbiology	NCBI	na	DEXR00000000	na	na
Flavobacteriaceae bacterium UBA3197	Parks et al. (2017) Nature Microbiology	NCBI	na	DEWZ00000000	na	na
Flavobacteriaceae bacterium UBA3200	Parks et al. (2017) Nature Microbiology	NCBI	na	DEWW00000000	na	na
Flavobacteriaceae bacterium UBA3356	Parks et al. (2017) Nature Microbiology	NCBI	na	DEQW00000000	na	na
Flavobacteriaceae bacterium UBA3537	Parks et al. (2017) Nature Microbiology	NCBI	na	DFOQ00000000	na	na
Flavobacteriaceae bacterium UBA3591	Parks et al. (2017) Nature Microbiology	NCBI	na	DFMO00000000	na	na
Flavobacteriaceae bacterium UBA3594	Parks et al. (2017) Nature Microbiology	NCBI	na	DFML00000000	na	na
Flavobacteriaceae bacterium UBA3611	Parks et al. (2017) Nature Microbiology	NCBI	na	DFLU00000000	na	na
Flavobacteriaceae bacterium UBA4166	Parks et al. (2017) Nature Microbiology	NCBI	na	DFVG00000000	na	na
Flavobacteriaceae bacterium UBA4167	Parks et al. (2017) Nature Microbiology	NCBI	na	DFVF00000000	na	na
Flavobacteriaceae bacterium UBA4504	Parks et al. (2017) Nature Microbiology	NCBI	na	DGNA00000000	na	na
Flavobacteriaceae bacterium UBA4518	Parks et al. (2017) Nature Microbiology	NCBI	na	DGMM00000000	na	na
Flavobacteriaceae bacterium UBA4525	Parks et al. (2017) Nature Microbiology	NCBI	na	DGMF00000000	na	na
Flavobacteriaceae bacterium UBA5079	Parks et al. (2017) Nature Microbiology	NCBI	na	DIAL00000000	na	na
Flavobacteriaceae bacterium UBA5160	Parks et al. (2017) Nature Microbiology	NCBI	na	DHXI00000000	na	na
Flavobacteriaceae bacterium UBA6515	Parks et al. (2017) Nature Microbiology	NCBI	na	DJLN00000000	na	na
Flavobacteriaceae bacterium UBA6619	Parks et al. (2017) Nature Microbiology	NCBI	na	DJHN00000000	na	na
Flavobacteriaceae bacterium UBA6779	Parks et al. (2017) Nature Microbiology	NCBI	na	DKGD00000000	na	na
Flavobacteriaceae bacterium UBA6780	Parks et al. (2017) Nature Microbiology	NCBI	na	DKGC00000000	na	na
Flavobacteriaceae bacterium UBA6781	Parks et al. (2017) Nature Microbiology	NCBI	na	DKGB00000000	na	na
Flavobacteriaceae bacterium UBA6787	Parks et al. (2017) Nature Microbiology	NCBI	na	DKFV00000000	na	na
Flavobacteriaceae bacterium UBA724	Parks et al. (2017) Nature Microbiology	NCBI	na	DBLM00000000	na	na
Flavobacteriaceae bacterium UBA7302	Parks et al. (2017) Nature Microbiology	NCBI	na	DKQS00000000	na	na
Flavobacteriaceae bacterium UBA7311	Parks et al. (2017) Nature Microbiology	NCBI	na	DKQJ00000000	na	na
Flavobacteriaceae bacterium UBA7322	Parks et al. (2017) Nature Microbiology	NCBI	na	DKPY00000000	na	na
Flavobacteriaceae bacterium UBA7369	Parks et al. (2017) Nature Microbiology	NCBI	na	DKOF00000000	na	na
Flavobacteriaceae bacterium UBA7802	Parks et al. (2017) Nature Microbiology	NCBI	na	DLCI00000000	na	na
Flavobacteriaceae bacterium UBA819	Parks et al. (2017) Nature Microbiology	NCBI	na	DBHV00000000	na	na
Flavobacteriaceae bacterium UBA891	Parks et al. (2017) Nature Microbiology	NCBI	na	DBFB00000000	na	na
Flavobacteriaceae bacterium UBA893	Parks et al. (2017) Nature Microbiology	NCBI	na	DBEZ00000000	na	na
Flavobacteriales bacterium UBA1112	Parks et al. (2017) Nature Microbiology	NCBI	na	DCBH00000000	na	na
Flavobacteriales bacterium UBA1128	Parks et al. (2017) Nature Microbiology	NCBI	na	DCAR00000000	na	na
Flavobacteriales bacterium UBA1336	Parks et al. (2017) Nature Microbiology	NCBI	na	DBSS00000000	na	na
Flavobacteriales bacterium UBA1339	Parks et al. (2017) Nature Microbiology	NCBI	na	DBSP00000000	na	na
Flavobacteriales bacterium UBA1494	Parks et al. (2017) Nature Microbiology	NCBI	na	DCRK00000000	na	na
Flavobacteriales bacterium UBA1510	Parks et al. (2017) Nature Microbiology	NCBI	na	DCQU00000000	na	na
Flavobacteriales bacterium UBA1531	Parks et al. (2017) Nature Microbiology	NCBI	na	DCPZ00000000	na	na
Flavobacteriales bacterium UBA1958	Parks et al. (2017) Nature Microbiology	NCBI	na	DDEI00000000	na	na
Flavobacteriales bacterium UBA1959	Parks et al. (2017) Nature Microbiology	NCBI	na	DDEH00000000	na	na
Flavobacteriales bacterium UBA1962	Parks et al. (2017) Nature Microbiology	NCBI	na	DDEE00000000	na	na
Flavobacteriales bacterium UBA1970	Parks et al. (2017) Nature Microbiology	NCBI	na	DDDW00000000	na	na
Flavobacteriales bacterium UBA2104	Parks et al. (2017) Nature Microbiology	NCBI	na	DCYS00000000	na	na
Flavobacteriales bacterium UBA2108	Parks et al. (2017) Nature Microbiology	NCBI	na	DCYO00000000	na	na
Flavobacteriales bacterium UBA2113	Parks et al. (2017) Nature Microbiology	NCBI	na	DCYJ00000000	na	na
Flavobacteriales bacterium UBA2617	Parks et al. (2017) Nature Microbiology	NCBI	na	DDJT00000000	na	na
Flavobacteriales bacterium UBA2619	Parks et al. (2017) Nature Microbiology	NCBI	na	DDJR00000000	na	na
Flavobacteriales bacterium UBA2636	Parks et al. (2017) Nature Microbiology	NCBI	na	DENU00000000	na	na
Flavobacteriales bacterium UBA2669	Parks et al. (2017) Nature Microbiology	NCBI	na	DEMN00000000	na	na
Flavobacteriales bacterium UBA2958	Parks et al. (2017) Nature Microbiology	NCBI	na	DEBK00000000	na	na
Flavobacteriales bacterium UBA3390	Parks et al. (2017) Nature Microbiology	NCBI	na	DEPO00000000	na	na
Flavobacteriales bacterium UBA4159	Parks et al. (2017) Nature Microbiology	NCBI	na	DFVN00000000	na	na
Flavobacteriales bacterium UBA4507	Parks et al. (2017) Nature Microbiology	NCBI	na	DGMX00000000	na	na
Flavobacteriales bacterium UBA5051	Parks et al. (2017) Nature Microbiology	NCBI	na	DIBN00000000	na	na
Flavobacteriales bacterium UBA5081	Parks et al. (2017) Nature Microbiology	NCBI	na	DIAJ00000000	na	na
Flavobacteriales bacterium UBA5165	Parks et al. (2017) Nature Microbiology	NCBI	na	DHXD00000000	na	na
Flavobacteriales bacterium UBA5692	Parks et al. (2017) Nature Microbiology	NCBI	na	DIHQ00000000	na	na
Flavobacteriales bacterium UBA6770	Parks et al. (2017) Nature Microbiology	NCBI	na	DKGM00000000	na	na
Flavobacteriales bacterium UBA6771	Parks et al. (2017) Nature Microbiology	NCBI	na	DKGL00000000	na	na
Flavobacteriales bacterium UBA6772	Parks et al. (2017) Nature Microbiology	NCBI	na	DKGK00000000	na	na
Flavobacteriales bacterium UBA6923	Parks et al. (2017) Nature Microbiology	NCBI	na	DKAP00000000	na	na
Flavobacteriales bacterium UBA6969	Parks et al. (2017) Nature Microbiology	NCBI	na	DJYV00000000	na	na
Flavobacteriales bacterium UBA6970	Parks et al. (2017) Nature Microbiology	NCBI	na	DJYU00000000	na	na
Flavobacteriales bacterium UBA7312	Parks et al. (2017) Nature Microbiology	NCBI	na	DKQI00000000	na	na
Flavobacteriales bacterium UBA7325	Parks et al. (2017) Nature Microbiology	NCBI	na	DKPV00000000	na	na
Flavobacteriales bacterium UBA7382	Parks et al. (2017) Nature Microbiology	NCBI	na	DKNS00000000	na	na
Flavobacteriales bacterium UBA7795	Parks et al. (2017) Nature Microbiology	NCBI	na	DLCP00000000	na	na
Flavobacteriales bacterium UBA7819	Parks et al. (2017) Nature Microbiology	NCBI	na	DLBR00000000	na	na
Flavobacteriales bacterium UBA7878	Parks et al. (2017) Nature Microbiology	NCBI	na	DLRW00000000	na	na
Flavobacteriales bacterium UBA852	Parks et al. (2017) Nature Microbiology	NCBI	na	DBGO00000000	na	na
Francisellaceae bacterium UBA7831	Parks et al. (2017) Nature Microbiology	NCBI	na	DLTR00000000	na	na
Fusobacteriia bacterium UBA1095	Parks et al. (2017) Nature Microbiology	NCBI	na	DCBY00000000	na	na
Fusobacteriia bacterium UBA1674	Parks et al. (2017) Nature Microbiology	NCBI	na	DCKM00000000	na	na
Fusobacteriia bacterium UBA1975	Parks et al. (2017) Nature Microbiology	NCBI	na	DDDR00000000	na	na
Fusobacteriia bacterium UBA6774	Parks et al. (2017) Nature Microbiology	NCBI	na	DKGI00000000	na	na
Fusobacteriia bacterium UBA816	Parks et al. (2017) Nature Microbiology	NCBI	na	DBHY00000000	na	na
Gammaproteobacteria bacterium UBA1012	Parks et al. (2017) Nature Microbiology	NCBI	na	DBAK00000000	na	na
Gammaproteobacteria bacterium UBA1118	Parks et al. (2017) Nature Microbiology	NCBI	na	DCBB00000000	na	na
Gammaproteobacteria bacterium UBA1119	Parks et al. (2017) Nature Microbiology	NCBI	na	DCBA00000000	na	na
Gammaproteobacteria bacterium UBA1283	Parks et al. (2017) Nature Microbiology	NCBI	na	DBUT00000000	na	na
Gammaproteobacteria bacterium UBA1529	Parks et al. (2017) Nature Microbiology	NCBI	na	DCQB00000000	na	na
Gammaproteobacteria bacterium UBA1853	Parks et al. (2017) Nature Microbiology	NCBI	na	DDIJ00000000	na	na
Gammaproteobacteria bacterium UBA1902	Parks et al. (2017) Nature Microbiology	NCBI	na	DDGM00000000	na	na
Gammaproteobacteria bacterium UBA1961	Parks et al. (2017) Nature Microbiology	NCBI	na	DDEF00000000	na	na
Gammaproteobacteria bacterium UBA1979	Parks et al. (2017) Nature Microbiology	NCBI	na	DDDN00000000	na	na
Gammaproteobacteria bacterium UBA2168	Parks et al. (2017) Nature Microbiology	NCBI	na	DCWG00000000	na	na
Gammaproteobacteria bacterium UBA2663	Parks et al. (2017) Nature Microbiology	NCBI	na	DEMT00000000	na	na
Gammaproteobacteria bacterium UBA2668	Parks et al. (2017) Nature Microbiology	NCBI	na	DEMO00000000	na	na
Gammaproteobacteria bacterium UBA2675	Parks et al. (2017) Nature Microbiology	NCBI	na	DEMH00000000	na	na
Gammaproteobacteria bacterium UBA2679	Parks et al. (2017) Nature Microbiology	NCBI	na	DEMD00000000	na	na
Gammaproteobacteria bacterium UBA2955	Parks et al. (2017) Nature Microbiology	NCBI	na	DEBN00000000	na	na
Gammaproteobacteria bacterium UBA2965	Parks et al. (2017) Nature Microbiology	NCBI	na	DEBD00000000	na	na
Gammaproteobacteria bacterium UBA3204	Parks et al. (2017) Nature Microbiology	NCBI	na	DEWS00000000	na	na
Gammaproteobacteria bacterium UBA3354	Parks et al. (2017) Nature Microbiology	NCBI	na	DEQY00000000	na	na
Gammaproteobacteria bacterium UBA3498	Parks et al. (2017) Nature Microbiology	NCBI	na	DFQD00000000	na	na
Gammaproteobacteria bacterium UBA3529	Parks et al. (2017) Nature Microbiology	NCBI	na	DFOY00000000	na	na
Gammaproteobacteria bacterium UBA3532	Parks et al. (2017) Nature Microbiology	NCBI	na	DFOV00000000	na	na
Gammaproteobacteria bacterium UBA3977	Parks et al. (2017) Nature Microbiology	NCBI	na	DGCN00000000	na	na
Gammaproteobacteria bacterium UBA3978	Parks et al. (2017) Nature Microbiology	NCBI	na	DGCM00000000	na	na
Gammaproteobacteria bacterium UBA4501	Parks et al. (2017) Nature Microbiology	NCBI	na	DGND00000000	na	na
Gammaproteobacteria bacterium UBA4514	Parks et al. (2017) Nature Microbiology	NCBI	na	DGMQ00000000	na	na
Gammaproteobacteria bacterium UBA5078	Parks et al. (2017) Nature Microbiology	NCBI	na	DIAM00000000	na	na
Gammaproteobacteria bacterium UBA5109	Parks et al. (2017) Nature Microbiology	NCBI	na	DHZH00000000	na	na
Gammaproteobacteria bacterium UBA6498	Parks et al. (2017) Nature Microbiology	NCBI	na	DJME00000000	na	na
Gammaproteobacteria bacterium UBA6621	Parks et al. (2017) Nature Microbiology	NCBI	na	DJHL00000000	na	na
Gammaproteobacteria bacterium UBA6940	Parks et al. (2017) Nature Microbiology	NCBI	na	DJZY00000000	na	na
Gammaproteobacteria bacterium UBA6966	Parks et al. (2017) Nature Microbiology	NCBI	na	DJYY00000000	na	na
Gammaproteobacteria bacterium UBA6968	Parks et al. (2017) Nature Microbiology	NCBI	na	DJYW00000000	na	na
Gammaproteobacteria bacterium UBA725	Parks et al. (2017) Nature Microbiology	NCBI	na	DBLL00000000	na	na
Gammaproteobacteria bacterium UBA7310	Parks et al. (2017) Nature Microbiology	NCBI	na	DKQK00000000	na	na
Gammaproteobacteria bacterium UBA7376	Parks et al. (2017) Nature Microbiology	NCBI	na	DKNY00000000	na	na
Gammaproteobacteria bacterium UBA7379	Parks et al. (2017) Nature Microbiology	NCBI	na	DKNV00000000	na	na
Gammaproteobacteria bacterium UBA7449	Parks et al. (2017) Nature Microbiology	NCBI	na	DLPV00000000	na	na
Gammaproteobacteria bacterium UBA7451	Parks et al. (2017) Nature Microbiology	NCBI	na	DLPT00000000	na	na
Gammaproteobacteria bacterium UBA7455	Parks et al. (2017) Nature Microbiology	NCBI	na	DLPP00000000	na	na
Gammaproteobacteria bacterium UBA7796	Parks et al. (2017) Nature Microbiology	NCBI	na	DLCO00000000	na	na
Gammaproteobacteria bacterium UBA7803	Parks et al. (2017) Nature Microbiology	NCBI	na	DLCH00000000	na	na
Gammaproteobacteria bacterium UBA7820	Parks et al. (2017) Nature Microbiology	NCBI	na	DLBQ00000000	na	na
Gammaproteobacteria bacterium UBA7873	Parks et al. (2017) Nature Microbiology	NCBI	na	DLSB00000000	na	na
Gammaproteobacteria bacterium UBA7885	Parks et al. (2017) Nature Microbiology	NCBI	na	DLRP00000000	na	na
Gammaproteobacteria bacterium UBA855	Parks et al. (2017) Nature Microbiology	NCBI	na	DBGL00000000	na	na
Gemmatimonadales bacterium UBA1007	Parks et al. (2017) Nature Microbiology	NCBI	na	DBAP00000000	na	na
Gemmatimonadales bacterium UBA1120	Parks et al. (2017) Nature Microbiology	NCBI	na	DCAZ00000000	na	na
Gemmatimonadales bacterium UBA1125	Parks et al. (2017) Nature Microbiology	NCBI	na	DCAU00000000	na	na
Gemmatimonadales bacterium UBA1525	Parks et al. (2017) Nature Microbiology	NCBI	na	DCQF00000000	na	na
Gemmatimonadales bacterium UBA2589	Parks et al. (2017) Nature Microbiology	NCBI	na	DDKV00000000	na	na
Gemmatimonadales bacterium UBA2960	Parks et al. (2017) Nature Microbiology	NCBI	na	DEBI00000000	na	na
Gemmatimonadales bacterium UBA2969	Parks et al. (2017) Nature Microbiology	NCBI	na	DEAZ00000000	na	na
Gemmatimonadales bacterium UBA2975	Parks et al. (2017) Nature Microbiology	NCBI	na	DEAT00000000	na	na
Gemmatimonadales bacterium UBA2981	Parks et al. (2017) Nature Microbiology	NCBI	na	DEAN00000000	na	na
Gemmatimonadales bacterium UBA2982	Parks et al. (2017) Nature Microbiology	NCBI	na	DEAM00000000	na	na
Gemmatimonadales bacterium UBA2988	Parks et al. (2017) Nature Microbiology	NCBI	na	DEAG00000000	na	na
Gemmatimonadales bacterium UBA2989	Parks et al. (2017) Nature Microbiology	NCBI	na	DEAF00000000	na	na
Gemmatimonadales bacterium UBA3497	Parks et al. (2017) Nature Microbiology	NCBI	na	DFQE00000000	na	na
Gemmatimonadales bacterium UBA3501	Parks et al. (2017) Nature Microbiology	NCBI	na	DFQA00000000	na	na
Gemmatimonadales bacterium UBA3511	Parks et al. (2017) Nature Microbiology	NCBI	na	DFPQ00000000	na	na
Gemmatimonadales bacterium UBA3512	Parks et al. (2017) Nature Microbiology	NCBI	na	DFPP00000000	na	na
Gemmatimonadales bacterium UBA6588	Parks et al. (2017) Nature Microbiology	NCBI	na	DJIS00000000	na	na
Gemmatimonadales bacterium UBA6612	Parks et al. (2017) Nature Microbiology	NCBI	na	DJHU00000000	na	na
Gemmatimonadales bacterium UBA6932	Parks et al. (2017) Nature Microbiology	NCBI	na	DKAG00000000	na	na
Gemmatimonadales bacterium UBA6934	Parks et al. (2017) Nature Microbiology	NCBI	na	DKAE00000000	na	na
Gemmatimonadales bacterium UBA6943	Parks et al. (2017) Nature Microbiology	NCBI	na	DJZV00000000	na	na
Gemmatimonadales bacterium UBA6959	Parks et al. (2017) Nature Microbiology	NCBI	na	DJZF00000000	na	na
Gemmatimonadales bacterium UBA6960	Parks et al. (2017) Nature Microbiology	NCBI	na	DJZE00000000	na	na
Gemmatimonadales bacterium UBA7825	Parks et al. (2017) Nature Microbiology	NCBI	na	DLTX00000000	na	na
Gemmatimonadales bacterium UBA7826	Parks et al. (2017) Nature Microbiology	NCBI	na	DLTW00000000	na	na
Gemmatimonadales bacterium UBA7835	Parks et al. (2017) Nature Microbiology	NCBI	na	DLTN00000000	na	na
Gemmatimonadales bacterium UBA7836	Parks et al. (2017) Nature Microbiology	NCBI	na	DLTM00000000	na	na
Gemmatimonadales bacterium UBA7889	Parks et al. (2017) Nature Microbiology	NCBI	na	DLRL00000000	na	na
Gemmatimonadales bacterium UBA822	Parks et al. (2017) Nature Microbiology	NCBI	na	DBHS00000000	na	na
Gemmatimonadales bacterium UBA829	Parks et al. (2017) Nature Microbiology	NCBI	na	DBHL00000000	na	na
Gemmatimonadales bacterium UBA887	Parks et al. (2017) Nature Microbiology	NCBI	na	DBFF00000000	na	na
Gillisia sp UBA3175	Parks et al. (2017) Nature Microbiology	NCBI	na	DEXV00000000	na	na
Glaciecola sp UBA1851	Parks et al. (2017) Nature Microbiology	NCBI	na	DDIL00000000	na	na
Halieaceae bacterium UBA2614	Parks et al. (2017) Nature Microbiology	NCBI	na	DDJW00000000	na	na
Halieaceae bacterium UBA3099	Parks et al. (2017) Nature Microbiology	NCBI	na	DFAT00000000	na	na
Halieaceae bacterium UBA3187	Parks et al. (2017) Nature Microbiology	NCBI	na	DEXJ00000000	na	na
Halieaceae bacterium UBA3188	Parks et al. (2017) Nature Microbiology	NCBI	na	DEXI00000000	na	na
Halieaceae bacterium UBA3993	Parks et al. (2017) Nature Microbiology	NCBI	na	DGBX00000000	na	na
Halieaceae bacterium UBA4216	Parks et al. (2017) Nature Microbiology	NCBI	na	DFTI00000000	na	na
Halieaceae bacterium UBA4500	Parks et al. (2017) Nature Microbiology	NCBI	na	DGNE00000000	na	na
Halieaceae bacterium UBA5044	Parks et al. (2017) Nature Microbiology	NCBI	na	DIBU00000000	na	na
Halieaceae bacterium UBA5055	Parks et al. (2017) Nature Microbiology	NCBI	na	DIBJ00000000	na	na
Halieaceae bacterium UBA5085	Parks et al. (2017) Nature Microbiology	NCBI	na	DIAF00000000	na	na
Halieaceae bacterium UBA5105	Parks et al. (2017) Nature Microbiology	NCBI	na	DHZL00000000	na	na
Halieaceae bacterium UBA5721	Parks et al. (2017) Nature Microbiology	NCBI	na	DIGN00000000	na	na
Halieaceae bacterium UBA6519	Parks et al. (2017) Nature Microbiology	NCBI	na	DJLJ00000000	na	na
Halieaceae bacterium UBA7381	Parks et al. (2017) Nature Microbiology	NCBI	na	DKNT00000000	na	na
Halomonas sp UBA1491	Parks et al. (2017) Nature Microbiology	NCBI	na	DCRN00000000	na	na
Halomonas sp UBA3173	Parks et al. (2017) Nature Microbiology	NCBI	na	DEXX00000000	na	na
Halomonas sp UBA3980	Parks et al. (2017) Nature Microbiology	NCBI	na	DGCK00000000	na	na
Herbaspirillum sp UBA812	Parks et al. (2017) Nature Microbiology	NCBI	na	DBIC00000000	na	na
Holosporaceae bacterium UBA7879	Parks et al. (2017) Nature Microbiology	NCBI	na	DLRV00000000	na	na
Hyphomonadaceae bacterium UBA1849	Parks et al. (2017) Nature Microbiology	NCBI	na	DDIN00000000	na	na
Hyphomonadaceae bacterium UBA5102	Parks et al. (2017) Nature Microbiology	NCBI	na	DHZO00000000	na	na
Hyphomonadaceae bacterium UBA5161	Parks et al. (2017) Nature Microbiology	NCBI	na	DHXH00000000	na	na
Hyphomonas sp UBA1469	Parks et al. (2017) Nature Microbiology	NCBI	na	DCSJ00000000	na	na
Hyphomonas sp UBA1472	Parks et al. (2017) Nature Microbiology	NCBI	na	DCSG00000000	na	na
Hyphomonas sp UBA1474	Parks et al. (2017) Nature Microbiology	NCBI	na	DCSE00000000	na	na
Hyphomonas sp UBA1899	Parks et al. (2017) Nature Microbiology	NCBI	na	DDGP00000000	na	na
Hyphomonas sp UBA1914	Parks et al. (2017) Nature Microbiology	NCBI	na	DDGA00000000	na	na
Hyphomonas sp UBA1923	Parks et al. (2017) Nature Microbiology	NCBI	na	DDFR00000000	na	na
Hyphomonas sp UBA2515	Parks et al. (2017) Nature Microbiology	NCBI	na	DDNR00000000	na	na
Hyphomonas sp UBA2654	Parks et al. (2017) Nature Microbiology	NCBI	na	DENC00000000	na	na
Hyphomonas sp UBA2660	Parks et al. (2017) Nature Microbiology	NCBI	na	DEMW00000000	na	na
Hyphomonas sp UBA2691	Parks et al. (2017) Nature Microbiology	NCBI	na	DELR00000000	na	na
Hyphomonas sp UBA3195	Parks et al. (2017) Nature Microbiology	NCBI	na	DEXB00000000	na	na
Hyphomonas sp UBA3201	Parks et al. (2017) Nature Microbiology	NCBI	na	DEWV00000000	na	na
Hyphomonas sp UBA3592	Parks et al. (2017) Nature Microbiology	NCBI	na	DFMN00000000	na	na
Hyphomonas sp UBA3596	Parks et al. (2017) Nature Microbiology	NCBI	na	DFMJ00000000	na	na
Hyphomonas sp UBA3601	Parks et al. (2017) Nature Microbiology	NCBI	na	DFME00000000	na	na
Hyphomonas sp UBA3973	Parks et al. (2017) Nature Microbiology	NCBI	na	DGCR00000000	na	na
Hyphomonas sp UBA3988	Parks et al. (2017) Nature Microbiology	NCBI	na	DGCC00000000	na	na
Hyphomonas sp UBA4208	Parks et al. (2017) Nature Microbiology	NCBI	na	DFTQ00000000	na	na
Hyphomonas sp UBA4484	Parks et al. (2017) Nature Microbiology	NCBI	na	DGNU00000000	na	na
Hyphomonas sp UBA4505	Parks et al. (2017) Nature Microbiology	NCBI	na	DGMZ00000000	na	na
Hyphomonas sp UBA4508	Parks et al. (2017) Nature Microbiology	NCBI	na	DGMW00000000	na	na
Hyphomonas sp UBA4510	Parks et al. (2017) Nature Microbiology	NCBI	na	DGMU00000000	na	na
Hyphomonas sp UBA5091	Parks et al. (2017) Nature Microbiology	NCBI	na	DHZZ00000000	na	na
Hyphomonas sp UBA5107	Parks et al. (2017) Nature Microbiology	NCBI	na	DHZJ00000000	na	na
Hyphomonas sp UBA5111	Parks et al. (2017) Nature Microbiology	NCBI	na	DHZF00000000	na	na
Idiomarina sp UBA1478	Parks et al. (2017) Nature Microbiology	NCBI	na	DCSA00000000	na	na
Idiomarina sp UBA1482	Parks et al. (2017) Nature Microbiology	NCBI	na	DCRW00000000	na	na
Idiomarina sp UBA1919	Parks et al. (2017) Nature Microbiology	NCBI	na	DDFV00000000	na	na
Idiomarina sp UBA3162	Parks et al. (2017) Nature Microbiology	NCBI	na	DEYI00000000	na	na
Idiomarina sp UBA3176	Parks et al. (2017) Nature Microbiology	NCBI	na	DEXU00000000	na	na
Idiomarina sp UBA3992	Parks et al. (2017) Nature Microbiology	NCBI	na	DGBY00000000	na	na
Idiomarina sp UBA4206	Parks et al. (2017) Nature Microbiology	NCBI	na	DFTS00000000	na	na
Idiomarina sp UBA4211	Parks et al. (2017) Nature Microbiology	NCBI	na	DFTN00000000	na	na
Idiomarina sp UBA4519	Parks et al. (2017) Nature Microbiology	NCBI	na	DGML00000000	na	na
Idiomarina sp UBA4520	Parks et al. (2017) Nature Microbiology	NCBI	na	DGMK00000000	na	na
Idiomarina sp UBA5185	Parks et al. (2017) Nature Microbiology	NCBI	na	DHWJ00000000	na	na
Idiomarina sp UBA6937	Parks et al. (2017) Nature Microbiology	NCBI	na	DKAB00000000	na	na
Kordiimonadaceae bacterium UBA2615	Parks et al. (2017) Nature Microbiology	NCBI	na	DDJV00000000	na	na
Kordiimonadaceae bacterium UBA4149	Parks et al. (2017) Nature Microbiology	NCBI	na	DFVX00000000	na	na
Latescibacteria bacterium UBA2968	Parks et al. (2017) Nature Microbiology	NCBI	na	DEBA00000000	na	na
Latescibacteria bacterium UBA2992	Parks et al. (2017) Nature Microbiology	NCBI	na	DEAC00000000	na	na
Latescibacteria bacterium UBA2998	Parks et al. (2017) Nature Microbiology	NCBI	na	DDZW00000000	na	na
Latescibacteria bacterium UBA6620	Parks et al. (2017) Nature Microbiology	NCBI	na	DJHM00000000	na	na
Leeuwenhoekiella sp UBA1003	Parks et al. (2017) Nature Microbiology	NCBI	na	DBAT00000000	na	na
Leeuwenhoekiella sp UBA3167	Parks et al. (2017) Nature Microbiology	NCBI	na	DEYD00000000	na	na
Leeuwenhoekiella sp UBA4164	Parks et al. (2017) Nature Microbiology	NCBI	na	DFVI00000000	na	na
Leeuwenhoekiella sp UBA6783	Parks et al. (2017) Nature Microbiology	NCBI	na	DKFZ00000000	na	na
Legionellales bacterium UBA1113	Parks et al. (2017) Nature Microbiology	NCBI	na	DCBG00000000	na	na
Legionellales bacterium UBA1524	Parks et al. (2017) Nature Microbiology	NCBI	na	DCQG00000000	na	na
Legionellales bacterium UBA6500	Parks et al. (2017) Nature Microbiology	NCBI	na	DJMC00000000	na	na
Legionellales bacterium UBA6603	Parks et al. (2017) Nature Microbiology	NCBI	na	DJID00000000	na	na
Legionellales bacterium UBA6786	Parks et al. (2017) Nature Microbiology	NCBI	na	DKFW00000000	na	na
Leptospiraceae bacterium UBA1091	Parks et al. (2017) Nature Microbiology	NCBI	na	DCCC00000000	na	na
Leptospiraceae bacterium UBA3464	Parks et al. (2017) Nature Microbiology	NCBI	na	DFRL00000000	na	na
Leptospiraceae bacterium UBA3465	Parks et al. (2017) Nature Microbiology	NCBI	na	DFRK00000000	na	na
Leptospiraceae bacterium UBA4148	Parks et al. (2017) Nature Microbiology	NCBI	na	DFVY00000000	na	na
Leptospiraceae bacterium UBA7230	Parks et al. (2017) Nature Microbiology	NCBI	na	DKTM00000000	na	na
Leptospiraceae bacterium UBA726	Parks et al. (2017) Nature Microbiology	NCBI	na	DBLK00000000	na	na
Leptospiraceae bacterium UBA7318	Parks et al. (2017) Nature Microbiology	NCBI	na	DKQC00000000	na	na
Leptospiraceae bacterium UBA7801	Parks et al. (2017) Nature Microbiology	NCBI	na	DLCJ00000000	na	na
Limnobacter sp UBA1615	Parks et al. (2017) Nature Microbiology	NCBI	na	DCMT00000000	na	na
Limnobacter sp UBA3355	Parks et al. (2017) Nature Microbiology	NCBI	na	DEQX00000000	na	na
Limnobacter sp UBA3510	Parks et al. (2017) Nature Microbiology	NCBI	na	DFPR00000000	na	na
Limnobacter sp UBA3528	Parks et al. (2017) Nature Microbiology	NCBI	na	DFOZ00000000	na	na
Limnobacter sp UBA6514	Parks et al. (2017) Nature Microbiology	NCBI	na	DJLO00000000	na	na
Limnobacter sp UBA7229	Parks et al. (2017) Nature Microbiology	NCBI	na	DKTN00000000	na	na
Limnobacter sp UBA7305	Parks et al. (2017) Nature Microbiology	NCBI	na	DKQP00000000	na	na
Limnobacter sp UBA882	Parks et al. (2017) Nature Microbiology	NCBI	na	DBFK00000000	na	na
Maribacter sp UBA1493	Parks et al. (2017) Nature Microbiology	NCBI	na	DCRL00000000	na	na
Maribacter sp UBA3344	Parks et al. (2017) Nature Microbiology	NCBI	na	DERI00000000	na	na
Maribacter sp UBA4516	Parks et al. (2017) Nature Microbiology	NCBI	na	DGMO00000000	na	na
Maribacter sp UBA6511	Parks et al. (2017) Nature Microbiology	NCBI	na	DJLR00000000	na	na
Maribacter sp UBA849	Parks et al. (2017) Nature Microbiology	NCBI	na	DBGR00000000	na	na
Marinimicrobium sp UBA4209	Parks et al. (2017) Nature Microbiology	NCBI	na	DFTP00000000	na	na
Marinimicrobium sp UBA4509	Parks et al. (2017) Nature Microbiology	NCBI	na	DGMV00000000	na	na
Marinobacter sp UBA1922	Parks et al. (2017) Nature Microbiology	NCBI	na	DDFS00000000	na	na
Marinobacter sp UBA2498	Parks et al. (2017) Nature Microbiology	NCBI	na	DDOI00000000	na	na
Marinobacter sp UBA2504	Parks et al. (2017) Nature Microbiology	NCBI	na	DDOC00000000	na	na
Marinobacter sp UBA2678	Parks et al. (2017) Nature Microbiology	NCBI	na	DEME00000000	na	na
Marinobacter sp UBA2688	Parks et al. (2017) Nature Microbiology	NCBI	na	DELU00000000	na	na
Marinobacter sp UBA2698	Parks et al. (2017) Nature Microbiology	NCBI	na	DELK00000000	na	na
Marinobacter sp UBA3182	Parks et al. (2017) Nature Microbiology	NCBI	na	DEXO00000000	na	na
Marinobacter sp UBA3604	Parks et al. (2017) Nature Microbiology	NCBI	na	DFMB00000000	na	na
Marinobacter sp UBA3607	Parks et al. (2017) Nature Microbiology	NCBI	na	DFLY00000000	na	na
Marinobacter sp UBA4153	Parks et al. (2017) Nature Microbiology	NCBI	na	DFVT00000000	na	na
Marinobacter sp UBA5687	Parks et al. (2017) Nature Microbiology	NCBI	na	DIHV00000000	na	na
Marinobacter sp UBA6499	Parks et al. (2017) Nature Microbiology	NCBI	na	DJMD00000000	na	na
Marinobacter sp UBA6604	Parks et al. (2017) Nature Microbiology	NCBI	na	DJIC00000000	na	na
Marinobacter sp UBA7807	Parks et al. (2017) Nature Microbiology	NCBI	na	DLCD00000000	na	na
Marinobacter sp UBA856	Parks et al. (2017) Nature Microbiology	NCBI	na	DBGK00000000	na	na
Maritimibacter sp UBA3975	Parks et al. (2017) Nature Microbiology	NCBI	na	DGCP00000000	na	na
Martelella sp UBA3392	Parks et al. (2017) Nature Microbiology	NCBI	na	DEPM00000000	na	na
Methylococcaceae bacterium UBA1114	Parks et al. (2017) Nature Microbiology	NCBI	na	DCBF00000000	na	na
Methylophaga sp UBA1464	Parks et al. (2017) Nature Microbiology	NCBI	na	DCSO00000000	na	na
Methylophaga sp UBA1484	Parks et al. (2017) Nature Microbiology	NCBI	na	DCRU00000000	na	na
Methylophaga sp UBA1490	Parks et al. (2017) Nature Microbiology	NCBI	na	DCRO00000000	na	na
Methylophaga sp UBA1918	Parks et al. (2017) Nature Microbiology	NCBI	na	DDFW00000000	na	na
Methylophaga sp UBA2496	Parks et al. (2017) Nature Microbiology	NCBI	na	DDOK00000000	na	na
Methylophaga sp UBA2502	Parks et al. (2017) Nature Microbiology	NCBI	na	DDOE00000000	na	na
Methylophaga sp UBA2513	Parks et al. (2017) Nature Microbiology	NCBI	na	DDNT00000000	na	na
Methylophaga sp UBA2659	Parks et al. (2017) Nature Microbiology	NCBI	na	DEMX00000000	na	na
Methylophaga sp UBA2661	Parks et al. (2017) Nature Microbiology	NCBI	na	DEMV00000000	na	na
Methylophaga sp UBA2673	Parks et al. (2017) Nature Microbiology	NCBI	na	DEMJ00000000	na	na
Methylophaga sp UBA2687	Parks et al. (2017) Nature Microbiology	NCBI	na	DELV00000000	na	na
Methylophaga sp UBA2689	Parks et al. (2017) Nature Microbiology	NCBI	na	DELT00000000	na	na
Methylophaga sp UBA2696	Parks et al. (2017) Nature Microbiology	NCBI	na	DELM00000000	na	na
Methylophaga sp UBA3172	Parks et al. (2017) Nature Microbiology	NCBI	na	DEXY00000000	na	na
Methylophaga sp UBA3191	Parks et al. (2017) Nature Microbiology	NCBI	na	DEXF00000000	na	na
Methylophaga sp UBA3192	Parks et al. (2017) Nature Microbiology	NCBI	na	DEXE00000000	na	na
Methylophaga sp UBA3196	Parks et al. (2017) Nature Microbiology	NCBI	na	DEXA00000000	na	na
Methylophaga sp UBA3369	Parks et al. (2017) Nature Microbiology	NCBI	na	DEQJ00000000	na	na
Methylophaga sp UBA3593	Parks et al. (2017) Nature Microbiology	NCBI	na	DFMM00000000	na	na
Methylophaga sp UBA3595	Parks et al. (2017) Nature Microbiology	NCBI	na	DFMK00000000	na	na
Methylophaga sp UBA3603	Parks et al. (2017) Nature Microbiology	NCBI	na	DFMC00000000	na	na
Methylophaga sp UBA3613	Parks et al. (2017) Nature Microbiology	NCBI	na	DFLS00000000	na	na
Methylophaga sp UBA3618	Parks et al. (2017) Nature Microbiology	NCBI	na	DFLN00000000	na	na
Methylophaga sp UBA3991	Parks et al. (2017) Nature Microbiology	NCBI	na	DGBZ00000000	na	na
Methylophaga sp UBA3996	Parks et al. (2017) Nature Microbiology	NCBI	na	DGBU00000000	na	na
Methylophaga sp UBA4204	Parks et al. (2017) Nature Microbiology	NCBI	na	DFTU00000000	na	na
Methylophaga sp UBA4502	Parks et al. (2017) Nature Microbiology	NCBI	na	DGNC00000000	na	na
Methylophaga sp UBA4512	Parks et al. (2017) Nature Microbiology	NCBI	na	DGMS00000000	na	na
Methylophaga sp UBA5054	Parks et al. (2017) Nature Microbiology	NCBI	na	DIBK00000000	na	na
Methylophaga sp UBA5057	Parks et al. (2017) Nature Microbiology	NCBI	na	DIBH00000000	na	na
Methylophaga sp UBA5063	Parks et al. (2017) Nature Microbiology	NCBI	na	DIBB00000000	na	na
Methylophaga sp UBA5088	Parks et al. (2017) Nature Microbiology	NCBI	na	DIAC00000000	na	na
Methylophaga sp UBA5100	Parks et al. (2017) Nature Microbiology	NCBI	na	DHZQ00000000	na	na
Methylophaga sp UBA5113	Parks et al. (2017) Nature Microbiology	NCBI	na	DHZD00000000	na	na
Methylophaga sp UBA678	Parks et al. (2017) Nature Microbiology	NCBI	na	DBNG00000000	na	na
Micavibrio sp UBA1512	Parks et al. (2017) Nature Microbiology	NCBI	na	DCQS00000000	na	na
Micavibrio sp UBA1618	Parks et al. (2017) Nature Microbiology	NCBI	na	DCMQ00000000	na	na
Micavibrio sp UBA1664	Parks et al. (2017) Nature Microbiology	NCBI	na	DCKW00000000	na	na
Micavibrio sp UBA1672	Parks et al. (2017) Nature Microbiology	NCBI	na	DCKO00000000	na	na
Micavibrio sp UBA1850	Parks et al. (2017) Nature Microbiology	NCBI	na	DDIM00000000	na	na
Micavibrio sp UBA1968	Parks et al. (2017) Nature Microbiology	NCBI	na	DDDY00000000	na	na
Micavibrio sp UBA1983	Parks et al. (2017) Nature Microbiology	NCBI	na	DDDJ00000000	na	na
Micavibrio sp UBA2137	Parks et al. (2017) Nature Microbiology	NCBI	na	DCXL00000000	na	na
Micavibrio sp UBA2621	Parks et al. (2017) Nature Microbiology	NCBI	na	DDJP00000000	na	na
Micavibrio sp UBA2638	Parks et al. (2017) Nature Microbiology	NCBI	na	DENS00000000	na	na
Micavibrio sp UBA2705	Parks et al. (2017) Nature Microbiology	NCBI	na	DELD00000000	na	na
Micavibrio sp UBA3352	Parks et al. (2017) Nature Microbiology	NCBI	na	DERA00000000	na	na
Micavibrio sp UBA3357	Parks et al. (2017) Nature Microbiology	NCBI	na	DEQV00000000	na	na
Micavibrio sp UBA3393	Parks et al. (2017) Nature Microbiology	NCBI	na	DEPL00000000	na	na
Micavibrio sp UBA3503	Parks et al. (2017) Nature Microbiology	NCBI	na	DFPY00000000	na	na
Micavibrio sp UBA5167	Parks et al. (2017) Nature Microbiology	NCBI	na	DHXB00000000	na	na
Micavibrio sp UBA6513	Parks et al. (2017) Nature Microbiology	NCBI	na	DJLP00000000	na	na
Micavibrio sp UBA671	Parks et al. (2017) Nature Microbiology	NCBI	na	DBNN00000000	na	na
Micavibrio sp UBA6929	Parks et al. (2017) Nature Microbiology	NCBI	na	DKAJ00000000	na	na
Micavibrio sp UBA6964	Parks et al. (2017) Nature Microbiology	NCBI	na	DJZA00000000	na	na
Micavibrio sp UBA6971	Parks et al. (2017) Nature Microbiology	NCBI	na	DJYT00000000	na	na
Micavibrio sp UBA7307	Parks et al. (2017) Nature Microbiology	NCBI	na	DKQN00000000	na	na
Micavibrio sp UBA851	Parks et al. (2017) Nature Microbiology	NCBI	na	DBGP00000000	na	na
Microbacteriaceae bacterium UBA1477	Parks et al. (2017) Nature Microbiology	NCBI	na	DCSB00000000	na	na
Microbacteriaceae bacterium UBA1487	Parks et al. (2017) Nature Microbiology	NCBI	na	DCRR00000000	na	na
Microbacteriaceae bacterium UBA1492	Parks et al. (2017) Nature Microbiology	NCBI	na	DCRM00000000	na	na
Microbacteriaceae bacterium UBA1607	Parks et al. (2017) Nature Microbiology	NCBI	na	DCNB00000000	na	na
Microbacteriaceae bacterium UBA1613	Parks et al. (2017) Nature Microbiology	NCBI	na	DCMV00000000	na	na
Microbacteriaceae bacterium UBA3350	Parks et al. (2017) Nature Microbiology	NCBI	na	DERC00000000	na	na
Microbacteriaceae bacterium UBA5056	Parks et al. (2017) Nature Microbiology	NCBI	na	DIBI00000000	na	na
Microbacteriaceae bacterium UBA5098	Parks et al. (2017) Nature Microbiology	NCBI	na	DHZS00000000	na	na
Microbacteriaceae bacterium UBA6523	Parks et al. (2017) Nature Microbiology	NCBI	na	DJLF00000000	na	na
Microbacteriaceae bacterium UBA6524	Parks et al. (2017) Nature Microbiology	NCBI	na	DJLE00000000	na	na
Microbacteriaceae bacterium UBA6606	Parks et al. (2017) Nature Microbiology	NCBI	na	DJIA00000000	na	na
Microbacteriaceae bacterium UBA6891	Parks et al. (2017) Nature Microbiology	NCBI	na	DKBV00000000	na	na
Microbacteriaceae bacterium UBA6954	Parks et al. (2017) Nature Microbiology	NCBI	na	DJZK00000000	na	na
Microbacterium sp UBA1097	Parks et al. (2017) Nature Microbiology	NCBI	na	DCBW00000000	na	na
Microbacterium sp UBA1612	Parks et al. (2017) Nature Microbiology	NCBI	na	DCMW00000000	na	na
Microbacterium sp UBA1663	Parks et al. (2017) Nature Microbiology	NCBI	na	DCKX00000000	na	na
Microbacterium sp UBA1667	Parks et al. (2017) Nature Microbiology	NCBI	na	DCKT00000000	na	na
Microbacterium sp UBA3394	Parks et al. (2017) Nature Microbiology	NCBI	na	DEPK00000000	na	na
Microbacterium sp UBA3397	Parks et al. (2017) Nature Microbiology	NCBI	na	DEPH00000000	na	na
Microbacterium sp UBA4541	Parks et al. (2017) Nature Microbiology	NCBI	na	DGLP00000000	na	na
Microbacterium sp UBA5159	Parks et al. (2017) Nature Microbiology	NCBI	na	DHXJ00000000	na	na
Microbacterium sp UBA6496	Parks et al. (2017) Nature Microbiology	NCBI	na	DJMG00000000	na	na
Microbacterium sp UBA6782	Parks et al. (2017) Nature Microbiology	NCBI	na	DKGA00000000	na	na
Microbacterium sp UBA837	Parks et al. (2017) Nature Microbiology	NCBI	na	DBHD00000000	na	na
Microbacterium sp UBA888	Parks et al. (2017) Nature Microbiology	NCBI	na	DBFE00000000	na	na
Muricauda sp UBA6785	Parks et al. (2017) Nature Microbiology	NCBI	na	DKFX00000000	na	na
Muricauda sp UBA7809	Parks et al. (2017) Nature Microbiology	NCBI	na	DLCB00000000	na	na
Myxococcales bacterium UBA1532	Parks et al. (2017) Nature Microbiology	NCBI	na	DCPY00000000	na	na
Myxococcales bacterium UBA1660	Parks et al. (2017) Nature Microbiology	NCBI	na	DCLA00000000	na	na
Myxococcales bacterium UBA1671	Parks et al. (2017) Nature Microbiology	NCBI	na	DCKP00000000	na	na
Myxococcales bacterium UBA3505	Parks et al. (2017) Nature Microbiology	NCBI	na	DFPW00000000	na	na
Myxococcales bacterium UBA4151	Parks et al. (2017) Nature Microbiology	NCBI	na	DFVV00000000	na	na
Myxococcales bacterium UBA6777	Parks et al. (2017) Nature Microbiology	NCBI	na	DKGF00000000	na	na
Myxococcales bacterium UBA727	Parks et al. (2017) Nature Microbiology	NCBI	na	DBLJ00000000	na	na
Myxococcales bacterium UBA7319	Parks et al. (2017) Nature Microbiology	NCBI	na	DKQB00000000	na	na
Neptuniibacter sp UBA6509	Parks et al. (2017) Nature Microbiology	NCBI	na	DJLT00000000	na	na
Neptuniibacter sp UBA847	Parks et al. (2017) Nature Microbiology	NCBI	na	DBGT00000000	na	na
Nitrosomonadaceae bacterium UBA6933	Parks et al. (2017) Nature Microbiology	NCBI	na	DKAF00000000	na	na
Nitrososphaerales archaeon UBA213	Parks et al. (2017) Nature Microbiology	NCBI	na	DACA00000000	na	na
Nitrospinaceae bacterium UBA2164	Parks et al. (2017) Nature Microbiology	NCBI	na	DCWK00000000	na	na
Nitrospinaceae bacterium UBA3496	Parks et al. (2017) Nature Microbiology	NCBI	na	DFQF00000000	na	na
Nitrospinaceae bacterium UBA7883	Parks et al. (2017) Nature Microbiology	NCBI	na	DLRR00000000	na	na
Nitrospiraceae bacterium UBA2166	Parks et al. (2017) Nature Microbiology	NCBI	na	DCWI00000000	na	na
Oceanibulbus sp UBA3587	Parks et al. (2017) Nature Microbiology	NCBI	na	DFMS00000000	na	na
Oceanicaulis sp UBA2681	Parks et al. (2017) Nature Microbiology	NCBI	na	DEMB00000000	na	na
Oceanicaulis sp UBA6590	Parks et al. (2017) Nature Microbiology	NCBI	na	DJIQ00000000	na	na
Oceanicaulis sp UBA7814	Parks et al. (2017) Nature Microbiology	NCBI	na	DLBW00000000	na	na
Oceanospirillaceae bacterium UBA1126	Parks et al. (2017) Nature Microbiology	NCBI	na	DCAT00000000	na	na
Olleya sp UBA1516	Parks et al. (2017) Nature Microbiology	NCBI	na	DCQO00000000	na	na
Opitutaceae bacterium UBA7327	Parks et al. (2017) Nature Microbiology	NCBI	na	DKPT00000000	na	na
Opitutae bacterium UBA1116	Parks et al. (2017) Nature Microbiology	NCBI	na	DCBD00000000	na	na
Opitutae bacterium UBA1274	Parks et al. (2017) Nature Microbiology	NCBI	na	DBVC00000000	na	na
Opitutae bacterium UBA1276	Parks et al. (2017) Nature Microbiology	NCBI	na	DBVA00000000	na	na
Opitutae bacterium UBA1333	Parks et al. (2017) Nature Microbiology	NCBI	na	DBSV00000000	na	na
Opitutae bacterium UBA1508	Parks et al. (2017) Nature Microbiology	NCBI	na	DCQW00000000	na	na
Opitutae bacterium UBA1513	Parks et al. (2017) Nature Microbiology	NCBI	na	DCQR00000000	na	na
Opitutae bacterium UBA1856	Parks et al. (2017) Nature Microbiology	NCBI	na	DDIG00000000	na	na
Opitutae bacterium UBA1977	Parks et al. (2017) Nature Microbiology	NCBI	na	DDDP00000000	na	na
Opitutae bacterium UBA1981	Parks et al. (2017) Nature Microbiology	NCBI	na	DDDL00000000	na	na
Opitutae bacterium UBA2520	Parks et al. (2017) Nature Microbiology	NCBI	na	DDNM00000000	na	na
Opitutae bacterium UBA2637	Parks et al. (2017) Nature Microbiology	NCBI	na	DENT00000000	na	na
[truncated: 2,559 more rows]
