# Supplementary material for: Biases in genome reconstruction from metagenomic data
Source: PeerJ. 2020 Oct 30;8:e10119. doi: 10.7717/peerj.10119 (PMC7605220; doi:10.7717/peerj.10119)
Supplement: Supplemental Information 6 [file peerj-08-10119-s006.xlsx]

## Sheet: refseq_reference_representative
assembly_accession	bioproject	biosample	wgs_master	refseq_category	taxid	species_taxid	organism_name	infraspecific_name	isolate	version_status	assembly_level	release_type	genome_rep	seq_rel_date	asm_name	submitter	gbrs_paired_asm	paired_asm_comp	ftp_path	excluded_from_refseq	relation_to_type_material
GCF_000005845.2	PRJNA57779	SAMN02604091		reference genome	511145	562	Escherichia coli str. K-12 substr. MG1655	strain=K-12 substr. MG1655		latest	Complete Genome	Major	Full	2013-09-26	ASM584v2	Univ. Wisconsin	GCA_000005845.2	identical	ftp://ftp.ncbi.nlm.nih.gov/genomes/all/GCF/000/005/845/GCF_000005845.2_ASM584v2
GCF_000006745.1	PRJNA57623	SAMN02603969		reference genome	243277	666	Vibrio cholerae O1 biovar El Tor str. N16961	strain=N16961		latest	Complete Genome	Major	Full	2001-01-09	ASM674v1	TIGR	GCA_000006745.1	identical	ftp://ftp.ncbi.nlm.nih.gov/genomes/all/GCF/000/006/745/GCF_000006745.1_ASM674v1
GCF_000006765.1	PRJNA57945	SAMN02603714		reference genome	208964	287	Pseudomonas aeruginosa PAO1	strain=PAO1		latest	Complete Genome	Major	Full	2006-07-07	ASM676v1	PathoGenesis Corporation	GCA_000006765.1	identical	ftp://ftp.ncbi.nlm.nih.gov/genomes/all/GCF/000/006/765/GCF_000006765.1_ASM676v1
GCF_000006785.2	PRJNA57845	SAMN02604089		reference genome	160490	1314	Streptococcus pyogenes M1 GAS	strain=SF370		latest	Complete Genome	Major	Full	2014-04-01	ASM678v2	Univ. Oklahoma	GCA_000006785.2	identical	ftp://ftp.ncbi.nlm.nih.gov/genomes/all/GCF/000/006/785/GCF_000006785.2_ASM678v2
GCF_000006845.1	PRJNA57611	SAMN02604088		reference genome	242231	485	Neisseria gonorrhoeae FA 1090	strain=FA 1090		latest	Complete Genome	Major	Full	2005-02-14	ASM684v1	Univ. Oklahoma	GCA_000006845.1	identical	ftp://ftp.ncbi.nlm.nih.gov/genomes/all/GCF/000/006/845/GCF_000006845.1_ASM684v1
GCF_000006865.1	PRJNA57671	SAMN02603339		reference genome	272623	1358	Lactococcus lactis subsp. lactis Il1403	strain=IL1403		latest	Complete Genome	Major	Full	2001-03-21	ASM686v1	INRA	GCA_000006865.1	identical	ftp://ftp.ncbi.nlm.nih.gov/genomes/all/GCF/000/006/865/GCF_000006865.1_ASM686v1
GCF_000006905.1	PRJNA57891	SAMN02604005		reference genome	190650	155892	Caulobacter vibrioides CB15	strain=CB15		latest	Complete Genome	Major	Full	2002-03-06	ASM690v1	TIGR	GCA_000006905.1	identical	ftp://ftp.ncbi.nlm.nih.gov/genomes/all/GCF/000/006/905/GCF_000006905.1_ASM690v1
GCF_000006925.2	PRJNA62907	SAMN02603599		reference genome	198214	623	Shigella flexneri 2a str. 301	strain=301		latest	Complete Genome	Major	Full	2011-08-03	ASM692v2	Microbial Genome Center of ChMPH	GCA_000006925.2	identical	ftp://ftp.ncbi.nlm.nih.gov/genomes/all/GCF/000/006/925/GCF_000006925.2_ASM692v2
GCF_000006945.2	PRJNA57799	SAMN02604315		reference genome	99287	28901	Salmonella enterica subsp. enterica serovar Typhimurium str. LT2			latest	Complete Genome	Major	Full	2016-01-13	ASM694v2	Washington University Genome Sequencing Center	GCA_000006945.2	identical	ftp://ftp.ncbi.nlm.nih.gov/genomes/all/GCF/000/006/945/GCF_000006945.2_ASM694v2		assembly from type material
GCF_000006965.1	PRJNA57603	SAMEA3283068		reference genome	266834	382	Sinorhizobium meliloti 1021	strain=1021		latest	Complete Genome	Major	Full	2003-05-06	ASM696v1	MELILO	GCA_000006965.1	identical	ftp://ftp.ncbi.nlm.nih.gov/genomes/all/GCF/000/006/965/GCF_000006965.1_ASM696v1
GCF_000006985.1	PRJNA57897	SAMN02604006		reference genome	194439	1097	Chlorobaculum tepidum TLS	strain=TLS		latest	Complete Genome	Major	Full	2002-07-02	ASM698v1	TIGR	GCA_000006985.1	identical	ftp://ftp.ncbi.nlm.nih.gov/genomes/all/GCF/000/006/985/GCF_000006985.1_ASM698v1		assembly from type material
GCF_000007045.1	PRJNA57859	SAMN02603218		reference genome	171101	1313	Streptococcus pneumoniae R6	strain=R6		latest	Complete Genome	Major	Full	2002-11-25	ASM704v1	Eli Lilly and Company	GCA_000007045.1	identical	ftp://ftp.ncbi.nlm.nih.gov/genomes/all/GCF/000/007/045/GCF_000007045.1_ASM704v1
GCF_000007145.1	PRJNA57887	SAMN02603845		reference genome	190485	339	Xanthomonas campestris pv. campestris str. ATCC 33913	strain=ATCC 33913		latest	Complete Genome	Major	Full	2002-05-24	ASM714v1	Sao Paulo state (Brazil) Consortium	GCA_000007145.1	identical	ftp://ftp.ncbi.nlm.nih.gov/genomes/all/GCF/000/007/145/GCF_000007145.1_ASM714v1		assembly from type material
GCF_000007265.1	PRJNA57943	SAMN02604013		reference genome	208435	1311	Streptococcus agalactiae 2603V/R	strain=2603V/R		latest	Complete Genome	Major	Full	2002-08-28	ASM726v1	TIGR	GCA_000007265.1	identical	ftp://ftp.ncbi.nlm.nih.gov/genomes/all/GCF/000/007/265/GCF_000007265.1_ASM726v1
GCF_000007325.1	PRJNA57885	SAMN02603417		reference genome	190304	851	Fusobacterium nucleatum subsp. nucleatum ATCC 25586	strain=ATCC 25586		latest	Complete Genome	Major	Full	2002-04-09	ASM732v1	Integrated Genomics	GCA_000007325.1	identical	ftp://ftp.ncbi.nlm.nih.gov/genomes/all/GCF/000/007/325/GCF_000007325.1_ASM732v1	untrustworthy as type	assembly from type material
GCF_000007465.2	PRJNA57947	SAMN02604090		reference genome	210007	1309	Streptococcus mutans UA159	strain=UA159		latest	Complete Genome	Major	Full	2011-09-01	ASM746v2	Univ. Oklahoma	GCA_000007465.2	identical	ftp://ftp.ncbi.nlm.nih.gov/genomes/all/GCF/000/007/465/GCF_000007465.2_ASM746v2
GCF_000007525.1	PRJNA57939	SAMN02603675		reference genome	206672	216816	Bifidobacterium longum NCC2705	strain=NCC2705		latest	Complete Genome	Major	Full	2005-01-21	ASM752v1	Nestle Research Center, Switzerland	GCA_000007525.1	identical	ftp://ftp.ncbi.nlm.nih.gov/genomes/all/GCF/000/007/525/GCF_000007525.1_ASM752v1
GCF_000007565.2	PRJNA57843	SAMN02603999		reference genome	160488	303	Pseudomonas putida KT2440	strain=KT2440		latest	Complete Genome	Major	Full	2016-02-26	ASM756v2	TIGR	GCA_000007565.2	identical	ftp://ftp.ncbi.nlm.nih.gov/genomes/all/GCF/000/007/565/GCF_000007565.2_ASM756v2
GCF_000007645.1	PRJNA57861	SAMN02603126		reference genome	176280	1282	Staphylococcus epidermidis ATCC 12228	strain=ATCC 12228		latest	Complete Genome	Major	Full	2002-12-20	ASM764v1	Chinese National HGC, Shanghai	GCA_000007645.1	identical	ftp://ftp.ncbi.nlm.nih.gov/genomes/all/GCF/000/007/645/GCF_000007645.1_ASM764v1
GCF_000007765.2	PRJNA57631	SAMN02603970		reference genome	227377	777	Coxiella burnetii RSA 493	strain=RSA 493		latest	Complete Genome	Major	Full	2016-11-10	ASM776v2	TIGR	GCA_000007765.2	identical	ftp://ftp.ncbi.nlm.nih.gov/genomes/all/GCF/000/007/765/GCF_000007765.2_ASM776v2
GCF_000007785.1	PRJNA57669	SAMN02603978		reference genome	226185	1351	Enterococcus faecalis V583	strain=V583		latest	Complete Genome	Major	Full	2003-03-28	ASM778v1	TIGR	GCA_000007785.1	identical	ftp://ftp.ncbi.nlm.nih.gov/genomes/all/GCF/000/007/785/GCF_000007785.1_ASM778v1
GCF_000007805.1	PRJNA57967	SAMN02604017		reference genome	223283	251701	Pseudomonas syringae pv. tomato str. DC3000	strain=DC3000		latest	Complete Genome	Major	Full	2003-03-05	ASM780v1	TIGR	GCA_000007805.1	identical	ftp://ftp.ncbi.nlm.nih.gov/genomes/all/GCF/000/007/805/GCF_000007805.1_ASM780v1		assembly from type material
GCF_000007825.1	PRJNA57975	SAMN02603340		reference genome	226900	1396	Bacillus cereus ATCC 14579	strain=ATCC 14579		latest	Complete Genome	Major	Full	2004-07-06	ASM782v1	INRA	GCA_000007825.1	identical	ftp://ftp.ncbi.nlm.nih.gov/genomes/all/GCF/000/007/825/GCF_000007825.1_ASM782v1		assembly from type material
GCF_000007845.1	PRJNA57909	SAMN02603432		reference genome	198094	1392	Bacillus anthracis str. Ames	strain=Ames		latest	Complete Genome	Major	Full	2003-04-30	ASM784v1	J. Craig Venter Institute	GCA_000007845.1	identical	ftp://ftp.ncbi.nlm.nih.gov/genomes/all/GCF/000/007/845/GCF_000007845.1_ASM784v1
GCF_000007925.1	PRJNA57995	SAMN02603142		reference genome	167539	1219	Prochlorococcus marinus subsp. marinus str. CCMP1375	strain=CCMP1375; SS120		latest	Complete Genome	Major	Full	2003-07-25	ASM792v1	CNRS	GCA_000007925.1	identical	ftp://ftp.ncbi.nlm.nih.gov/genomes/all/GCF/000/007/925/GCF_000007925.1_ASM792v1		assembly from type material
GCF_000007985.2	PRJNA57743	SAMN02603989		reference genome	243231	35554	Geobacter sulfurreducens PCA	strain=PCA		latest	Complete Genome	Major	Full	2012-07-31	ASM798v2	TIGR	GCA_000007985.2	identical	ftp://ftp.ncbi.nlm.nih.gov/genomes/all/GCF/000/007/985/GCF_000007985.2_ASM798v2		assembly from type material
GCF_000008165.1	PRJNA58091	SAMN02598266		reference genome	260799	1392	Bacillus anthracis str. Sterne	strain=Sterne		latest	Complete Genome	Major	Full	2004-06-24	ASM816v1	DOE Joint Genome Institute	GCA_000008165.1	identical	ftp://ftp.ncbi.nlm.nih.gov/genomes/all/GCF/000/008/165/GCF_000008165.1_ASM816v1
GCF_000008185.1	PRJNA57583	SAMN02603967		reference genome	243275	158	Treponema denticola ATCC 35405	strain=ATCC 35405		latest	Complete Genome	Major	Full	2004-02-03	ASM818v1	TIGR	GCA_000008185.1	identical	ftp://ftp.ncbi.nlm.nih.gov/genomes/all/GCF/000/008/185/GCF_000008185.1_ASM818v1		assembly from type material
GCF_000008305.1	PRJNA58055	SAMN03081416		reference genome	265311	2151	Mesoplasma florum L1	strain=L1; ATCC 33453		latest	Complete Genome	Major	Full	2004-07-19	ASM830v1	Broad Institute	GCA_000008305.1	identical	ftp://ftp.ncbi.nlm.nih.gov/genomes/all/GCF/000/008/305/GCF_000008305.1_ASM830v1		assembly from type material
GCF_000008485.1	PRJNA57609	SAMN02603156		reference genome	272624	446	Legionella pneumophila subsp. pneumophila str. Philadelphia 1	strain=Philadelphia 1		latest	Complete Genome	Major	Full	2004-09-24	ASM848v1	Columbia Genome Center	GCA_000008485.1	identical	ftp://ftp.ncbi.nlm.nih.gov/genomes/all/GCF/000/008/485/GCF_000008485.1_ASM848v1		assembly from type material
GCF_000008505.1	PRJNA58089	SAMN02598265		reference genome	281309	1428	[Bacillus thuringiensis] serovar konkukian str. 97-27	strain=97-27		latest	Complete Genome	Major	Full	2004-12-27	ASM850v1	DOE Joint Genome Institute	GCA_000008505.1	identical	ftp://ftp.ncbi.nlm.nih.gov/genomes/all/GCF/000/008/505/GCF_000008505.1_ASM850v1
GCF_000008525.1	PRJNA57787	SAMN02603995		reference genome	85962	210	Helicobacter pylori 26695	strain=26695		latest	Complete Genome	Major	Full	1999-12-22	ASM852v1	TIGR	GCA_000008525.1	identical	ftp://ftp.ncbi.nlm.nih.gov/genomes/all/GCF/000/008/525/GCF_000008525.1_ASM852v1
GCF_000008545.1	PRJNA57723	SAMN02603986		reference genome	243274	2336	Thermotoga maritima MSB8	strain=MSB8		latest	Complete Genome	Major	Full	2001-01-09	ASM854v1	TIGR	GCA_000008545.1	identical	ftp://ftp.ncbi.nlm.nih.gov/genomes/all/GCF/000/008/545/GCF_000008545.1_ASM854v1		assembly from type material
GCF_000008565.1	PRJNA57665	SAMN02603976		reference genome	243230	1299	Deinococcus radiodurans R1	strain=R1		latest	Complete Genome	Major	Full	2000-12-11	ASM856v1	TIGR	GCA_000008565.1	identical	ftp://ftp.ncbi.nlm.nih.gov/genomes/all/GCF/000/008/565/GCF_000008565.1_ASM856v1		assembly from type material
GCF_000008625.1	PRJNA57765	SAMN02603207		reference genome	224324	63363	Aquifex aeolicus VF5	strain=VF5		latest	Complete Genome	Major	Full	1999-12-22	ASM862v1	DIVERSA	GCA_000008625.1	identical	ftp://ftp.ncbi.nlm.nih.gov/genomes/all/GCF/000/008/625/GCF_000008625.1_ASM862v1		assembly from type material
GCF_000008685.2	PRJNA57581	SAMN02603966		reference genome	224326	139	Borreliella burgdorferi B31	strain=B31		latest	Complete Genome	Major	Full	2011-11-09	ASM868v2	TIGR	GCA_000008685.2	identical	ftp://ftp.ncbi.nlm.nih.gov/genomes/all/GCF/000/008/685/GCF_000008685.2_ASM868v2		assembly from type material
GCF_000008725.1	PRJNA57637	SAMN02603114		reference genome	272561	813	Chlamydia trachomatis D/UW-3/CX	strain=D/UW-3/CX		latest	Complete Genome	Major	Full	2001-01-09	ASM872v1	ChGP	GCA_000008725.1	identical	ftp://ftp.ncbi.nlm.nih.gov/genomes/all/GCF/000/008/725/GCF_000008725.1_ASM872v1
GCF_000008745.1	PRJNA57811	SAMN02603115		reference genome	115713	83558	Chlamydia pneumoniae CWL029	strain=CWL029		latest	Complete Genome	Major	Full	1999-12-22	ASM874v1	ChGP	GCA_000008745.1	identical	ftp://ftp.ncbi.nlm.nih.gov/genomes/all/GCF/000/008/745/GCF_000008745.1_ASM874v1
GCF_000008765.1	PRJNA57677	SAMN02603243		reference genome	272562	1488	Clostridium acetobutylicum ATCC 824	strain=ATCC 824		latest	Complete Genome	Major	Full	2002-11-22	ASM876v1	Genome Therapeutics	GCA_000008765.1	identical	ftp://ftp.ncbi.nlm.nih.gov/genomes/all/GCF/000/008/765/GCF_000008765.1_ASM876v1		assembly from type material
GCF_000008805.1	PRJNA57817	SAMN02603997		reference genome	122586	487	Neisseria meningitidis MC58	strain=MC58		latest	Complete Genome	Major	Full	2005-05-26	ASM880v1	TIGR	GCA_000008805.1	identical	ftp://ftp.ncbi.nlm.nih.gov/genomes/all/GCF/000/008/805/GCF_000008805.1_ASM880v1
GCF_000008865.2	PRJNA57781	SAMN01911278		reference genome	386585	562	Escherichia coli O157:H7 str. Sakai	strain=Sakai substr. RIMD 0509952		latest	Complete Genome	Major	Full	2018-06-08	ASM886v2	GIRC	GCA_000008865.2	identical	ftp://ftp.ncbi.nlm.nih.gov/genomes/all/GCF/000/008/865/GCF_000008865.2_ASM886v2
GCF_000008925.1	PRJNA58233	SAMN02604111		reference genome	362948	1624	Lactobacillus salivarius UCC118	strain=UCC118		latest	Complete Genome	Major	Full	2006-03-30	ASM892v1	University College Cork	GCA_000008925.1	identical	ftp://ftp.ncbi.nlm.nih.gov/genomes/all/GCF/000/008/925/GCF_000008925.1_ASM892v1
GCF_000008985.1	PRJNA57589	SAMEA3138185		reference genome	177416	263	Francisella tularensis subsp. tularensis SCHU S4	strain=SCHU S4		latest	Complete Genome	Major	Full	2009-06-18	ASM898v1	Swedish Defence Research Agency	GCA_000008985.1	identical	ftp://ftp.ncbi.nlm.nih.gov/genomes/all/GCF/000/008/985/GCF_000008985.1_ASM898v1
GCF_000009045.1	PRJNA57675	SAMEA3138188		reference genome	224308	1423	Bacillus subtilis subsp. subtilis str. 168	strain=168		latest	Complete Genome	Major	Full	2009-03-17	ASM904v1	BSNR	GCA_000009045.1	identical	ftp://ftp.ncbi.nlm.nih.gov/genomes/all/GCF/000/009/045/GCF_000009045.1_ASM904v1		assembly from type material
GCF_000009065.1	PRJNA57621	SAMEA1705942		reference genome	214092	632	Yersinia pestis CO92	strain=CO92		latest	Complete Genome	Major	Full	2003-05-06	ASM906v1	Sanger Institute	GCA_000009065.1	identical	ftp://ftp.ncbi.nlm.nih.gov/genomes/all/GCF/000/009/065/GCF_000009065.1_ASM906v1
GCF_000009085.1	PRJNA57587	SAMEA1705929		reference genome	192222	197	Campylobacter jejuni subsp. jejuni NCTC 11168 = ATCC 700819	strain=NCTC 11168		latest	Complete Genome	Major	Full	2003-05-06	ASM908v1	Sanger Institute	GCA_000009085.1	identical	ftp://ftp.ncbi.nlm.nih.gov/genomes/all/GCF/000/009/085/GCF_000009085.1_ASM908v1
GCF_000009205.2	PRJNA57679	SAMEA1705932		reference genome	272563	1496	Clostridioides difficile 630	strain=630		latest	Complete Genome	Major	Full	2017-09-29	ASM920v2	Sanger Institute	GCA_000009205.2	identical	ftp://ftp.ncbi.nlm.nih.gov/genomes/all/GCF/000/009/205/GCF_000009205.2_ASM920v2
GCF_000009345.1	PRJNA57741	SAMEA1705958		reference genome	393305	630	Yersinia enterocolitica subsp. enterocolitica 8081	strain=8081		latest	Complete Genome	Major	Full	2007-01-12	ASM934v1	Sanger Institute	GCA_000009345.1	identical	ftp://ftp.ncbi.nlm.nih.gov/genomes/all/GCF/000/009/345/GCF_000009345.1_ASM934v1
GCF_000009605.1	PRJNA57805	SAMD00061095		reference genome	107806	9	Buchnera aphidicola str. APS (Acyrthosiphon pisum)	strain=APS	Tokyo1998	latest	Complete Genome	Major	Full	2004-05-11	ASM960v1	Rikken GSC	GCA_000009605.1	identical	ftp://ftp.ncbi.nlm.nih.gov/genomes/all/GCF/000/009/605/GCF_000009605.1_ASM960v1
GCF_000009925.1	PRJNA58195	SAMD00061068		reference genome	295405	817	Bacteroides fragilis YCH46	strain=YCH46		latest	Complete Genome	Major	Full	2004-09-16	ASM992v1	Kitasato Univ.	GCA_000009925.1	identical	ftp://ftp.ncbi.nlm.nih.gov/genomes/all/GCF/000/009/925/GCF_000009925.1_ASM992v1
GCF_000011065.1	PRJNA62913	SAMN02604314		reference genome	226186	818	Bacteroides thetaiotaomicron VPI-5482	strain=VPI-5482		latest	Complete Genome	Major	Full	2003-03-28	ASM1106v1	Washington University Department of Molecular Biology and Pharmacology	GCA_000011065.1	identical	ftp://ftp.ncbi.nlm.nih.gov/genomes/all/GCF/000/011/065/GCF_000011065.1_ASM1106v1		assembly from type material
GCF_000011325.1	PRJNA57905	SAMD00061105		reference genome	196627	1718	Corynebacterium glutamicum ATCC 13032	strain=ATCC 13032		latest	Complete Genome	Major	Full	2004-02-18	ASM1132v1	Kitasato Univ.	GCA_000011325.1	identical	ftp://ftp.ncbi.nlm.nih.gov/genomes/all/GCF/000/011/325/GCF_000011325.1_ASM1132v1		assembly from type material
GCF_000011345.1	PRJNA57907	SAMD00061106		reference genome	197221	146786	Thermosynechococcus elongatus BP-1			latest	Complete Genome	Major	Full	2004-05-11	ASM1134v1	Kazusa	GCA_000011345.1	identical	ftp://ftp.ncbi.nlm.nih.gov/genomes/all/GCF/000/011/345/GCF_000011345.1_ASM1134v1
GCF_000011365.1	PRJNA57599	SAMD00061083		reference genome	224911	1355477	Bradyrhizobium diazoefficiens USDA 110	strain=USDA 110		latest	Complete Genome	Major	Full	2004-05-11	ASM1136v1	Kazusa	GCA_000011365.1	identical	ftp://ftp.ncbi.nlm.nih.gov/genomes/all/GCF/000/011/365/GCF_000011365.1_ASM1136v1		assembly from type material
GCF_000011385.1	PRJNA58011	SAMD00061120		reference genome	251221	33072	Gloeobacter violaceus PCC 7421	strain=PCC 7421		latest	Complete Genome	Major	Full	2003-10-03	ASM1138v1	Kazusa	GCA_000011385.1	identical	ftp://ftp.ncbi.nlm.nih.gov/genomes/all/GCF/000/011/385/GCF_000011385.1_ASM1138v1		assembly from type material
GCF_000011445.1	PRJNA58031	SAMEA3138208		reference genome	272632	2102	Mycoplasma mycoides subsp. mycoides SC str. PG1	strain=PG1		latest	Complete Genome	Major	Full	2007-02-27	ASM1144v1	Royal Institute of Technology, Stockholm, Sweden	GCA_000011445.1	identical	ftp://ftp.ncbi.nlm.nih.gov/genomes/all/GCF/000/011/445/GCF_000011445.1_ASM1144v1	untrustworthy as type	assembly from type material
GCF_000011545.1	PRJNA57733	SAMEA1705938		reference genome	272560	28450	Burkholderia pseudomallei K96243	strain=K96243		latest	Complete Genome	Major	Full	2004-09-16	ASM1154v1	Sanger Institute	GCA_000011545.1	identical	ftp://ftp.ncbi.nlm.nih.gov/genomes/all/GCF/000/011/545/GCF_000011545.1_ASM1154v1
GCF_000011705.1	PRJNA57725	SAMN02603987		reference genome	243160	13373	Burkholderia mallei ATCC 23344	strain=ATCC 23344		latest	Complete Genome	Major	Full	2005-06-06	ASM1170v1	TIGR	GCA_000011705.1	identical	ftp://ftp.ncbi.nlm.nih.gov/genomes/all/GCF/000/011/705/GCF_000011705.1_ASM1170v1		assembly from type material
GCF_000011805.1	PRJNA58163	SAMN02604303		reference genome	312309	668	Aliivibrio fischeri ES114	strain=ES114		latest	Complete Genome	Major	Full	2008-04-02	ASM1180v1	W.M. Keck Microbial Communities and Cell-signaling Program	GCA_000011805.1	identical	ftp://ftp.ncbi.nlm.nih.gov/genomes/all/GCF/000/011/805/GCF_000011805.1_ASM1180v1
GCF_000011985.1	PRJNA57685	SAMN02603047		reference genome	272621	1579	Lactobacillus acidophilus NCFM	strain=NCFM		latest	Complete Genome	Major	Full	2007-11-01	ASM1198v1	Cal Poly. San Luis Obispo	GCA_000011985.1	identical	ftp://ftp.ncbi.nlm.nih.gov/genomes/all/GCF/000/011/985/GCF_000011985.1_ASM1198v1
GCF_000012005.1	PRJNA58213	SAMN02603600		reference genome	300267	622	Shigella dysenteriae Sd197	strain=Sd197		latest	Complete Genome	Major	Full	2007-04-05	ASM1200v1	Microbial Genome Center of ChMPH	GCA_000012005.1	identical	ftp://ftp.ncbi.nlm.nih.gov/genomes/all/GCF/000/012/005/GCF_000012005.1_ASM1200v1
GCF_000012245.1	PRJNA57931	SAMN02604347		reference genome	205918	317	Pseudomonas syringae pv. syringae B728a	strain=B728a		latest	Complete Genome	Major	Full	2005-05-12	ASM1224v1	DOE Joint Genome Institute	GCA_000012245.1	identical	ftp://ftp.ncbi.nlm.nih.gov/genomes/all/GCF/000/012/245/GCF_000012245.1_ASM1224v1
GCF_000013045.1	PRJNA58513	SAMN02604045		reference genome	309807	146919	Salinibacter ruber DSM 13855	strain=DSM 13855; M31		latest	Complete Genome	Major	Full	2005-12-20	ASM1304v1	TIGR	GCA_000013045.1	identical	ftp://ftp.ncbi.nlm.nih.gov/genomes/all/GCF/000/013/045/GCF_000013045.1_ASM1304v1		assembly from type material
GCF_000013085.1	PRJNA57655	SAMN02598538		reference genome	269796	1085	Rhodospirillum rubrum ATCC 11170	strain=ATCC 11170		latest	Complete Genome	Major	Full	2005-12-12	ASM1308v1	DOE Joint Genome Institute	GCA_000013085.1	identical	ftp://ftp.ncbi.nlm.nih.gov/genomes/all/GCF/000/013/085/GCF_000013085.1_ASM1308v1		assembly from type material
GCF_000013105.1	PRJNA58051	SAMN02598257		reference genome	264732	1525	Moorella thermoacetica ATCC 39073	strain=ATCC 39073		latest	Complete Genome	Major	Full	2005-12-12	ASM1310v1	DOE Joint Genome Institute	GCA_000013105.1	identical	ftp://ftp.ncbi.nlm.nih.gov/genomes/all/GCF/000/013/105/GCF_000013105.1_ASM1310v1
GCF_000013425.1	PRJNA57795	SAMN02604235		reference genome	93061	1280	Staphylococcus aureus subsp. aureus NCTC 8325	strain=NCTC 8325		latest	Complete Genome	Major	Full	2006-02-13	ASM1342v1	University of Oklahoma Health Sciences Center	GCA_000013425.1	identical	ftp://ftp.ncbi.nlm.nih.gov/genomes/all/GCF/000/013/425/GCF_000013425.1_ASM1342v1
GCF_000014205.1	PRJNA224116	SAMN02604299		reference genome	388919	1305	Streptococcus sanguinis SK36	strain=SK36		latest	Complete Genome	Major	Full	2007-02-09	ASM1420v1	Virginia Commonwealth University	GCA_000014205.1	identical	ftp://ftp.ncbi.nlm.nih.gov/genomes/all/GCF/000/014/205/GCF_000014205.1_ASM1420v1
GCF_000014525.1	PRJNA57985	SAMN02598528		reference genome	321967	1597	Lactobacillus paracasei ATCC 334	strain=ATCC 334		latest	Complete Genome	Major	Full	2006-10-13	ASM1452v1	US DOE Joint Genome Institute (JGI), The Lactic Acid Bacteria Genome Consortium and Fidelity Systems Inc.	GCA_000014525.1	identical	ftp://ftp.ncbi.nlm.nih.gov/genomes/all/GCF/000/014/525/GCF_000014525.1_ASM1452v1
GCF_000014805.1	PRJNA58617	SAMN02604052		reference genome	380703	644	Aeromonas hydrophila subsp. hydrophila ATCC 7966	strain=ATCC 7966		latest	Complete Genome	Major	Full	2006-11-06	ASM1480v1	TIGR	GCA_000014805.1	identical	ftp://ftp.ncbi.nlm.nih.gov/genomes/all/GCF/000/014/805/GCF_000014805.1_ASM1480v1		assembly from type material
GCF_000015005.1	PRJNA57701	SAMN02603982		reference genome	246196	1772	Mycolicibacterium smegmatis MC2 155	strain=MC2 155		latest	Complete Genome	Major	Full	2006-11-20	ASM1500v1	TIGR	GCA_000015005.1	identical	ftp://ftp.ncbi.nlm.nih.gov/genomes/all/GCF/000/015/005/GCF_000015005.1_ASM1500v1
GCF_000017045.1	PRJNA58931	SAMN02603534		reference genome	441771	1491	Clostridium botulinum A str. Hall	strain=Hall		latest	Complete Genome	Major	Full	2007-07-20	ASM1704v1	Los Alamos National Laboratory	GCA_000017045.1	identical	ftp://ftp.ncbi.nlm.nih.gov/genomes/all/GCF/000/017/045/GCF_000017045.1_ASM1704v1
GCF_000017145.1	PRJNA58549	SAMN02598363		reference genome	366394	110321	Sinorhizobium medicae WSM419	strain=WSM419		latest	Complete Genome	Major	Full	2007-06-29	ASM1714v1	US DOE Joint Genome Institute	GCA_000017145.1	identical	ftp://ftp.ncbi.nlm.nih.gov/genomes/all/GCF/000/017/145/GCF_000017145.1_ASM1714v1
GCF_000018545.1	PRJNA59081	SAMN02603283		reference genome	394	380	Sinorhizobium fredii NGR234	strain=NGR234		latest	Complete Genome	Major	Full	2009-04-22	ASM1854v1	Goettingen Genomics Laboratory	GCA_000018545.1	identical	ftp://ftp.ncbi.nlm.nih.gov/genomes/all/GCF/000/018/545/GCF_000018545.1_ASM1854v1
GCF_000018865.1	PRJNA57657	SAMN02598539		reference genome	324602	1108	Chloroflexus aurantiacus J-10-fl	strain=J-10-fl		latest	Complete Genome	Major	Full	2007-12-20	ASM1886v1	US DOE Joint Genome Institute	GCA_000018865.1	identical	ftp://ftp.ncbi.nlm.nih.gov/genomes/all/GCF/000/018/865/GCF_000018865.1_ASM1886v1		assembly from type material
GCF_000020985.1	PRJNA59257	SAMN02603929		reference genome	289376	28262	Thermodesulfovibrio yellowstonii DSM 11347	strain=DSM 11347		latest	Complete Genome	Major	Full	2008-09-26	ASM2098v1	The J. Craig Venter Institute	GCA_000020985.1	identical	ftp://ftp.ncbi.nlm.nih.gov/genomes/all/GCF/000/020/985/GCF_000020985.1_ASM2098v1		assembly from type material
GCF_000021645.1	PRJNA59177	SAMN00002661		reference genome	515635	513050	Dictyoglomus turgidum DSM 6724	strain=DSM 6724		latest	Complete Genome	Major	Full	2008-12-12	ASM2164v1	US DOE Joint Genome Institute (JGI-PGF)	GCA_000021645.1	identical	ftp://ftp.ncbi.nlm.nih.gov/genomes/all/GCF/000/021/645/GCF_000021645.1_ASM2164v1		assembly from type material
GCF_000022005.1	PRJNA59307	SAMN02604151		reference genome	565050	155892	Caulobacter vibrioides NA1000	strain=NA1000		latest	Complete Genome	Major	Full	2009-01-16	ASM2200v1	University of Chicago	GCA_000022005.1	identical	ftp://ftp.ncbi.nlm.nih.gov/genomes/all/GCF/000/022/005/GCF_000022005.1_ASM2200v1
GCF_000023405.1	PRJNA58649	SAMN00002685		reference genome	446465	43669	Brachybacterium faecium DSM 4810	strain=DSM 4810		latest	Complete Genome	Major	Full	2009-08-25	ASM2340v1	US DOE Joint Genome Institute (JGI-PGF)	GCA_000023405.1	identical	ftp://ftp.ncbi.nlm.nih.gov/genomes/all/GCF/000/023/405/GCF_000023405.1_ASM2340v1		assembly from type material
GCF_000024905.1	PRJNA41925	SAMN00002595		reference genome	525903	81462	Thermanaerovibrio acidaminovorans DSM 6589	strain=DSM 6589		latest	Complete Genome	Major	Full	2009-11-19	ASM2490v1	US DOE Joint Genome Institute (JGI-PGF)	GCA_000024905.1	identical	ftp://ftp.ncbi.nlm.nih.gov/genomes/all/GCF/000/024/905/GCF_000024905.1_ASM2490v1		assembly from type material
GCF_000025565.1	PRJNA48363	SAMN02603901		reference genome	716541	550	Enterobacter cloacae subsp. cloacae ATCC 13047	strain=ATCC 13047		latest	Complete Genome	Major	Full	2010-04-23	ASM2556v1	TEDA School of Biological Sciences and Biotechnology, Nankai University	GCA_000025565.1	identical	ftp://ftp.ncbi.nlm.nih.gov/genomes/all/GCF/000/025/565/GCF_000025565.1_ASM2556v1		assembly from type material
GCF_000026345.1	PRJNA59381	SAMEA3138234		reference genome	585057	562	Escherichia coli IAI39	strain=IAI39		latest	Complete Genome	Major	Full	2008-12-18	ASM2634v1	Genoscope	GCA_000026345.1	identical	ftp://ftp.ncbi.nlm.nih.gov/genomes/all/GCF/000/026/345/GCF_000026345.1_ASM2634v1
GCF_000026745.1	PRJNA59321	SAMEA2272697		reference genome	568814	1307	Streptococcus suis BM407	strain=BM407		latest	Complete Genome	Major	Full	2009-07-07	ASM2674v1	The Wellcome Trust Sanger Institute	GCA_000026745.1	identical	ftp://ftp.ncbi.nlm.nih.gov/genomes/all/GCF/000/026/745/GCF_000026745.1_ASM2674v1
GCF_000027165.1	PRJNA46097	SAMEA3138244		reference genome	365659	28037	Streptococcus mitis B6	strain=B6		latest	Complete Genome	Major	Full	2010-02-16	ASM2716v1	Department of Microbiology, University of Kaiserslautern	GCA_000027165.1	identical	ftp://ftp.ncbi.nlm.nih.gov/genomes/all/GCF/000/027/165/GCF_000027165.1_ASM2716v1
GCF_000027305.1	PRJNA57771	SAMN02603991		reference genome	71421	727	Haemophilus influenzae Rd KW20			latest	Complete Genome	Major	Full	1999-12-22	ASM2730v1	TIGR	GCA_000027305.1	identical	ftp://ftp.ncbi.nlm.nih.gov/genomes/all/GCF/000/027/305/GCF_000027305.1_ASM2730v1
GCF_000027345.1	PRJNA57709	SAMN02603304		reference genome	272634	2104	Mycoplasma pneumoniae M129	strain=M129		latest	Complete Genome	Major	Full	2002-12-06	ASM2734v1	Heidelberg Univ.	GCA_000027345.1	identical	ftp://ftp.ncbi.nlm.nih.gov/genomes/all/GCF/000/027/345/GCF_000027345.1_ASM2734v1
GCF_000063585.1	PRJNA61579	SAMEA1705919		reference genome	413999	1491	Clostridium botulinum A str. ATCC 3502	strain=ATCC 3502		latest	Complete Genome	Major	Full	2007-05-24	ASM6358v1	Sanger Institute	GCA_000063585.1	identical	ftp://ftp.ncbi.nlm.nih.gov/genomes/all/GCF/000/063/585/GCF_000063585.1_ASM6358v1
GCF_000064305.2	PRJNA61627	SAMEA3138269		reference genome	402612	96345	Flavobacterium psychrophilum JIP02/86	strain=JIP02/86		latest	Complete Genome	Major	Full	2013-05-30	ASM6430v2	I.N.R.A., FRANCE	GCA_000064305.2	identical	ftp://ftp.ncbi.nlm.nih.gov/genomes/all/GCF/000/064/305/GCF_000064305.2_ASM6430v2
GCF_000068585.1	PRJNA61633	SAMEA1705923		reference genome	471472	813	Chlamydia trachomatis 434/Bu	strain=434/Bu		latest	Complete Genome	Major	Full	2008-01-17	ASM6858v1	Wellcome Trust Sanger Institute	GCA_000068585.1	identical	ftp://ftp.ncbi.nlm.nih.gov/genomes/all/GCF/000/068/585/GCF_000068585.1_ASM6858v1
GCF_000069185.1	PRJNA61613	SAMEA3138276		reference genome	36809	36809	Mycobacteroides abscessus			latest	Complete Genome	Major	Full	2008-03-01	ASM6918v1	Genoscope	GCA_000069185.1	identical	ftp://ftp.ncbi.nlm.nih.gov/genomes/all/GCF/000/069/185/GCF_000069185.1_ASM6918v1		assembly from type material
GCF_000091545.1	PRJNA58223	SAMD00061070		reference genome	300852	274	Thermus thermophilus HB8	strain=HB8		latest	Complete Genome	Major	Full	2004-11-15	ASM9154v1	National Institute of Advanced Industrial Science and Technology, Japan	GCA_000091545.1	identical	ftp://ftp.ncbi.nlm.nih.gov/genomes/all/GCF/000/091/545/GCF_000091545.1_ASM9154v1		assembly from type material
GCF_000092025.1	PRJNA57865	SAMN02603108		reference genome	176299	1176649	Agrobacterium fabrum str. C58	strain=C58		latest	Complete Genome	Major	Full	2007-11-05	ASM9202v1	Cereon	GCA_000092025.1	identical	ftp://ftp.ncbi.nlm.nih.gov/genomes/all/GCF/000/092/025/GCF_000092025.1_ASM9202v1		assembly from type material
GCF_000092565.1	PRJNA57881	SAMN02603127		reference genome	189518	173	Leptospira interrogans serovar Lai str. 56601	strain=56601		latest	Complete Genome	Major	Full	2010-04-06	ASM9256v1	Chinese National HGC, Shanghai	GCA_000092565.1	identical	ftp://ftp.ncbi.nlm.nih.gov/genomes/all/GCF/000/092/565/GCF_000092565.1_ASM9256v1
GCF_000146165.2	PRJNA57949	SAMN02604014		reference genome	211586	70863	Shewanella oneidensis MR-1	strain=MR-1		latest	Complete Genome	Major	Full	2012-11-02	ASM14616v2	TIGR	GCA_000146165.2	identical	ftp://ftp.ncbi.nlm.nih.gov/genomes/all/GCF/000/146/165/GCF_000146165.2_ASM14616v2		assembly from type material
GCF_000159155.2	PRJNA55487	SAMN00001462		reference genome	525284	2702	Gardnerella vaginalis ATCC 14019	strain=ATCC 14019		latest	Complete Genome	Major	Full	2010-11-03	ASM15915v2	Baylor College of Medicine	GCA_000159155.2	identical	ftp://ftp.ncbi.nlm.nih.gov/genomes/all/GCF/000/159/155/GCF_000159155.2_ASM15915v2
GCF_000165905.1	PRJNA59883	SAMN02603510		reference genome	702459	1681	Bifidobacterium bifidum PRL2010	strain=PRL2010		latest	Complete Genome	Major	Full	2010-11-02	ASM16590v1	Laboratory of Probiogenomics, Department of genetics, university of Parma, Italy	GCA_000165905.1	identical	ftp://ftp.ncbi.nlm.nih.gov/genomes/all/GCF/000/165/905/GCF_000165905.1_ASM16590v1
GCF_000174395.2	PRJNA55353	SAMN00002237		reference genome	333849	1352	Enterococcus faecium DO	strain=DO		latest	Complete Genome	Major	Full	2012-05-25	ASM17439v2	Baylor College of Medicine	GCA_000174395.2	identical	ftp://ftp.ncbi.nlm.nih.gov/genomes/all/GCF/000/174/395/GCF_000174395.2_ASM17439v2
GCF_000183345.1	PRJNA161987	SAMN02603727		reference genome	685038	562	Escherichia coli O83:H1 str. NRG 857C	strain=NRG 857C		latest	Complete Genome	Major	Full	2010-11-30	ASM18334v1	Public Health Agency of Canada Laboratory for Foodborne Zoonoses	GCA_000183345.1	identical	ftp://ftp.ncbi.nlm.nih.gov/genomes/all/GCF/000/183/345/GCF_000183345.1_ASM18334v1
GCF_000185905.1	PRJNA62101	SAMN00713576		reference genome	765698	39645	Mesorhizobium ciceri biovar biserrulae WSM1271	strain=WSM1271		latest	Complete Genome	Major	Full	2011-01-07	ASM18590v1	US DOE Joint Genome Institute	GCA_000185905.1	identical	ftp://ftp.ncbi.nlm.nih.gov/genomes/all/GCF/000/185/905/GCF_000185905.1_ASM18590v1
GCF_000191145.1	PRJNA83123	SAMN02603040		reference genome	871585	48296	Acinetobacter pittii PHEA-2	strain=PHEA-2		latest	Complete Genome	Major	Full	2011-03-03	ASM19114v1	Biotechnology Research Institute, Chinese Academy of Agricultural Sciences	GCA_000191145.1	identical	ftp://ftp.ncbi.nlm.nih.gov/genomes/all/GCF/000/191/145/GCF_000191145.1_ASM19114v1
GCF_000195715.1	PRJNA57617	SAMEA1705933		reference genome	257313	520	Bordetella pertussis Tohama I	strain=Tohama I		latest	Complete Genome	Major	Full	2003-08-12	ASM19571v1	Sanger Institute	GCA_000195715.1	identical	ftp://ftp.ncbi.nlm.nih.gov/genomes/all/GCF/000/195/715/GCF_000195715.1_ASM19571v1
GCF_000195735.1	PRJNA61565	SAMEA3138318		reference genome	272947	782	Rickettsia prowazekii str. Madrid E	strain=Madrid E		latest	Complete Genome	Major	Full	2003-05-06	ASM19573v1	Uppsala Univ.	GCA_000195735.1	identical	ftp://ftp.ncbi.nlm.nih.gov/genomes/all/GCF/000/195/735/GCF_000195735.1_ASM19573v1
GCF_000195755.1	PRJNA57645	SAMN02603973		reference genome	882	881	Desulfovibrio vulgaris str. Hildenborough	strain=Hildenborough		latest	Complete Genome	Major	Full	2004-04-21	ASM19575v1	TIGR	GCA_000195755.1	identical	ftp://ftp.ncbi.nlm.nih.gov/genomes/all/GCF/000/195/755/GCF_000195755.1_ASM19575v1		assembly from type material
GCF_000195835.2	PRJNA57695	SAMEA20450668		reference genome	233413	1773	Mycobacterium tuberculosis variant bovis AF2122/97		AF2122/97	latest	Complete Genome	Major	Full	2017-01-19	ASM19583v2	School of Veterinary Medicine	GCA_000195835.2	identical	ftp://ftp.ncbi.nlm.nih.gov/genomes/all/GCF/000/195/835/GCF_000195835.2_ASM19583v2
GCF_000195855.1	PRJNA57697	SAMEA1705921		reference genome	272631	1769	Mycobacterium leprae TN	strain=TN		latest	Complete Genome	Major	Full	2003-05-06	ASM19585v1	Sanger Institute	GCA_000195855.1	identical	ftp://ftp.ncbi.nlm.nih.gov/genomes/all/GCF/000/195/855/GCF_000195855.1_ASM19585v1
GCF_000195955.2	PRJNA57777	SAMEA3138326		reference genome	83332	1773	Mycobacterium tuberculosis H37Rv	strain=H37Rv		latest	Complete Genome	Major	Full	2013-02-01	ASM19595v2	Sanger Institute	GCA_000195955.2	identical	ftp://ftp.ncbi.nlm.nih.gov/genomes/all/GCF/000/195/955/GCF_000195955.2_ASM19595v2		assembly from type material
GCF_000195995.1	PRJNA57793	SAMEA1705914		reference genome	220341	28901	Salmonella enterica subsp. enterica serovar Typhi str. CT18	strain=CT18		latest	Complete Genome	Major	Full	2003-05-06	ASM19599v1	Sanger Institute	GCA_000195995.1	identical	ftp://ftp.ncbi.nlm.nih.gov/genomes/all/GCF/000/195/995/GCF_000195995.1_ASM19599v1
GCF_000196035.1	PRJNA61583	SAMEA3138329		reference genome	169963	1639	Listeria monocytogenes EGD-e	strain=EGD-e		latest	Complete Genome	Major	Full	2003-05-06	ASM19603v1	European Consortium	GCA_000196035.1	identical	ftp://ftp.ncbi.nlm.nih.gov/genomes/all/GCF/000/196/035/GCF_000196035.1_ASM19603v1
GCF_000196095.1	PRJNA57969	SAMD00058707		reference genome	223926	670	Vibrio parahaemolyticus RIMD 2210633			latest	Complete Genome	Major	Full	2004-05-11	ASM19609v1	Osaka Univ.	GCA_000196095.1	identical	ftp://ftp.ncbi.nlm.nih.gov/genomes/all/GCF/000/196/095/GCF_000196095.1_ASM19609v1
GCF_000196115.1	PRJNA61589	SAMEA3138332		reference genome	243090	265606	Rhodopirellula baltica SH 1	strain=1		latest	Complete Genome	Major	Full	2003-07-07	ASM19611v1	Max-Plank-Institute	GCA_000196115.1	identical	ftp://ftp.ncbi.nlm.nih.gov/genomes/all/GCF/000/196/115/GCF_000196115.1_ASM19611v1		assembly from type material
GCF_000196835.1	PRJNA50565	SAMN02603409		reference genome	749927	33910	Amycolatopsis mediterranei U32	strain=U32		latest	Complete Genome	Major	Full	2010-06-29	ASM19683v1	Institute of Plant Physiology and Ecology, Shanghai Institutes for Biological Sciences, Chinese Academy of Sciences	GCA_000196835.1	identical	ftp://ftp.ncbi.nlm.nih.gov/genomes/all/GCF/000/196/835/GCF_000196835.1_ASM19683v1
GCF_000203835.1	PRJNA57801	SAMEA1705940		reference genome	100226	1902	Streptomyces coelicolor A3(2)			latest	Complete Genome	Major	Full	2003-05-06	ASM20383v1	Sanger Institute	GCA_000203835.1	identical	ftp://ftp.ncbi.nlm.nih.gov/genomes/all/GCF/000/203/835/GCF_000203835.1_ASM20383v1
GCF_000203855.3	PRJNA62911	SAMEA3138345		reference genome	220668	1590	Lactobacillus plantarum WCFS1	strain=WCFS1	NCIMB8826	latest	Complete Genome	Major	Full	2011-08-01	ASM20385v3	Wageningen Centre for Food Sciences	GCA_000203855.3	identical	ftp://ftp.ncbi.nlm.nih.gov/genomes/all/GCF/000/203/855/GCF_000203855.3_ASM20385v3
GCF_000215745.1	PRJNA68103	SAMN02603581		reference genome	1028307	548	Klebsiella aerogenes KCTC 2190	strain=KCTC 2190		latest	Complete Genome	Major	Full	2011-06-03	ASM21574v1	Macrogen Inc.	GCA_000215745.1	identical	ftp://ftp.ncbi.nlm.nih.gov/genomes/all/GCF/000/215/745/GCF_000215745.1_ASM21574v1		assembly from type material
GCF_000223375.1	PRJNA161161	SAMN02603460		reference genome	759362	92945	Ketogulonicigenium vulgare WSH-001	strain=WSH-001		latest	Complete Genome	Major	Full	2011-08-12	ASM22337v1	Jiangnan University	GCA_000223375.1	identical	ftp://ftp.ncbi.nlm.nih.gov/genomes/all/GCF/000/223/375/GCF_000223375.1_ASM22337v1
GCF_000240185.1	PRJNA84387	SAMN02602959		reference genome	1125630	573	Klebsiella pneumoniae subsp. pneumoniae HS11286	strain=HS11286		latest	Complete Genome	Major	Full	2011-12-27	ASM24018v2	Bioinformatics & Microbial Genomics, State Key Laboratory of Microbial Metabolism, Shanghai Jiaotong University	GCA_000240185.2	identical	ftp://ftp.ncbi.nlm.nih.gov/genomes/all/GCF/000/240/185/GCF_000240185.1_ASM24018v2
GCF_000299455.1	PRJNA176127	SAMN01831188		reference genome	1133852	562	Escherichia coli O104:H4 str. 2011C-3493	strain=2011C-3493		latest	Complete Genome	Major	Full	2012-09-27	ASM29945v1	Los Alamos National Laboratory	GCA_000299455.1	identical	ftp://ftp.ncbi.nlm.nih.gov/genomes/all/GCF/000/299/455/GCF_000299455.1_ASM29945v1
GCF_000317935.1	PRJEA177516	SAMEA2272448		reference genome	1208660	519	Bordetella parapertussis Bpp5	strain=Bpp5		latest	Complete Genome	Major	Full	2012-10-08	ASM31793v1	WTSI	GCA_000317935.1	identical	ftp://ftp.ncbi.nlm.nih.gov/genomes/all/GCF/000/317/935/GCF_000317935.1_ASM31793v1
GCF_000318015.1	PRJNA178913	SAMEA2272388		reference genome	568707	518	Bordetella bronchiseptica 253	strain=253		latest	Complete Genome	Major	Full	2012-10-11	ASM31801v1	WTSI	GCA_000318015.1	identical	ftp://ftp.ncbi.nlm.nih.gov/genomes/all/GCF/000/318/015/GCF_000318015.1_ASM31801v1
GCF_000002515.2	PRJNA12377	SAMEA3138170		representative genome	28985	28985	Kluyveromyces lactis	strain=NRRL Y-1140		latest	Complete Genome	Major	Full	2004-07-02	ASM251v1	Genolevures Consortium	GCA_000002515.1	different	ftp://ftp.ncbi.nlm.nih.gov/genomes/all/GCF/000/002/515/GCF_000002515.2_ASM251v1
GCF_000002725.2	PRJNA15564	SAMEA3138173		representative genome	347515	5664	Leishmania major strain Friedlin	strain=Friedlin		latest	Complete Genome	Major	Full	2011-02-14	ASM272v2	Friedlin Consortium	GCA_000002725.2	identical	ftp://ftp.ncbi.nlm.nih.gov/genomes/all/GCF/000/002/725/GCF_000002725.2_ASM272v2
GCF_000002765.4	PRJNA148	SAMN00102897		representative genome	36329	5833	Plasmodium falciparum 3D7		3D7	latest	Complete Genome	Major	Full	2016-04-07	ASM276v2	Naval Medical Research Institute	GCA_000002765.2	different	ftp://ftp.ncbi.nlm.nih.gov/genomes/all/GCF/000/002/765/GCF_000002765.4_ASM276v2
GCF_000005825.2	PRJNA224116	SAMN02603086		representative genome	398511	79885	Bacillus pseudofirmus OF4	strain=OF4		latest	Complete Genome	Major	Full	2010-12-15	ASM582v2	Center for Genomic Sciences, Allegheny-Singer Research Institute	GCA_000005825.2	identical	ftp://ftp.ncbi.nlm.nih.gov/genomes/all/GCF/000/005/825/GCF_000005825.2_ASM582v2
GCF_000006175.1	PRJNA224116	SAMN00000040		representative genome	456320	2188	Methanococcus voltae A3	strain=A3		latest	Complete Genome	Major	Full	2010-06-03	ASM617v2	US DOE Joint Genome Institute (JGI-PGF)	GCA_000006175.2	identical	ftp://ftp.ncbi.nlm.nih.gov/genomes/all/GCF/000/006/175/GCF_000006175.1_ASM617v2
GCF_000006605.1	PRJNA224116	SAMEA3283089		representative genome	306537	38289	Corynebacterium jeikeium K411			latest	Complete Genome	Major	Full	2005-06-27	ASM660v1	Bielefeld Univ	GCA_000006605.1	identical	ftp://ftp.ncbi.nlm.nih.gov/genomes/all/GCF/000/006/605/GCF_000006605.1_ASM660v1
GCF_000006685.1	PRJNA224116	SAMN02603994		representative genome	243161	83560	Chlamydia muridarum str. Nigg	strain=Nigg		latest	Complete Genome	Major	Full	2003-03-26	ASM668v1	TIGR	GCA_000006685.1	identical	ftp://ftp.ncbi.nlm.nih.gov/genomes/all/GCF/000/006/685/GCF_000006685.1_ASM668v1		assembly from type material
GCF_000006725.1	PRJNA224116	SAMN02603773		representative genome	160492	2371	Xylella fastidiosa 9a5c	strain=9a5c		latest	Complete Genome	Major	Full	2004-06-04	ASM672v1	Sao Paulo state (Brazil) Consortium	GCA_000006725.1	identical	ftp://ftp.ncbi.nlm.nih.gov/genomes/all/GCF/000/006/725/GCF_000006725.1_ASM672v1
GCF_000006805.1	PRJNA224116	SAMN02604216		representative genome	64091	2242	Halobacterium salinarum NRC-1	strain=NRC-1; ATCC 700922		latest	Complete Genome	Major	Full	2001-01-09	ASM680v1	University of Massachusetts-Amherst, University of Washington	GCA_000006805.1	identical	ftp://ftp.ncbi.nlm.nih.gov/genomes/all/GCF/000/006/805/GCF_000006805.1_ASM680v1
GCF_000007025.1	PRJNA224116	SAMN02603141		representative genome	272944	781	Rickettsia conorii str. Malish 7	strain=Malish 7		latest	Complete Genome	Major	Full	2002-11-25	ASM702v1	CNRS	GCA_000007025.1	identical	ftp://ftp.ncbi.nlm.nih.gov/genomes/all/GCF/000/007/025/GCF_000007025.1_ASM702v1		assembly from type material
GCF_000007085.1	PRJNA224116	SAMN02603009		representative genome	273068	911092	Caldanaerobacter subterraneus subsp. tengcongensis MB4	strain=MB4		latest	Complete Genome	Major	Full	2002-05-14	ASM708v1	Beijing Center.HGP	GCA_000007085.1	identical	ftp://ftp.ncbi.nlm.nih.gov/genomes/all/GCF/000/007/085/GCF_000007085.1_ASM708v1		assembly from type material
GCF_000007125.1	PRJNA224116	SAMN02603416		representative genome	224914	29459	Brucella melitensis bv. 1 str. 16M	strain=16M		latest	Complete Genome	Major	Full	2001-12-28	ASM712v1	Integrated Genomics	GCA_000007125.1	identical	ftp://ftp.ncbi.nlm.nih.gov/genomes/all/GCF/000/007/125/GCF_000007125.1_ASM712v1		assembly from type material
GCF_000007305.1	PRJNA224116	SAMN02604284		representative genome	186497	2261	Pyrococcus furiosus DSM 3638	strain=DSM 3638		latest	Complete Genome	Major	Full	2002-02-27	ASM730v1	Utah Genome Center	GCA_000007305.1	identical	ftp://ftp.ncbi.nlm.nih.gov/genomes/all/GCF/000/007/305/GCF_000007305.1_ASM730v1		assembly from type material
GCF_000007365.1	PRJNA224116	SAMN02604269		representative genome	198804	9	Buchnera aphidicola str. Sg (Schizaphis graminum)	strain=Sg		latest	Complete Genome	Major	Full	2002-07-02	ASM736v1	Uppsala Univ.	GCA_000007365.1	identical	ftp://ftp.ncbi.nlm.nih.gov/genomes/all/GCF/000/007/365/GCF_000007365.1_ASM736v1
GCF_000007485.1	PRJNA224116	SAMN02603248		representative genome	203267	2039	Tropheryma whipplei str. Twist	strain=Twist		latest	Complete Genome	Major	Full	2003-02-24	ASM748v1	Genoscope	GCA_000007485.1	identical	ftp://ftp.ncbi.nlm.nih.gov/genomes/all/GCF/000/007/485/GCF_000007485.1_ASM748v1		assembly from type material
GCF_000007605.1	PRJNA224116	SAMN02603993		representative genome	227941	83557	Chlamydia caviae GPIC		GPIC	latest	Complete Genome	Major	Full	2003-04-14	ASM760v1	TIGR	GCA_000007605.1	identical	ftp://ftp.ncbi.nlm.nih.gov/genomes/all/GCF/000/007/605/GCF_000007605.1_ASM760v1		assembly from type material
GCF_000007625.1	PRJNA224116	SAMN02603289		representative genome	212717	1513	Clostridium tetani E88	strain=Massachusetts substr. E88		latest	Complete Genome	Major	Full	2003-02-05	ASM762v1	Gottingen Genomics Laboratory	GCA_000007625.1	identical	ftp://ftp.ncbi.nlm.nih.gov/genomes/all/GCF/000/007/625/GCF_000007625.1_ASM762v1
GCF_000007705.1	PRJNA224116	SAMN02603528		representative genome	243365	536	Chromobacterium violaceum ATCC 12472	strain=ATCC 12472		latest	Complete Genome	Major	Full	2003-08-22	ASM770v1	LNCC, Brazil	GCA_000007705.1	identical	ftp://ftp.ncbi.nlm.nih.gov/genomes/all/GCF/000/007/705/GCF_000007705.1_ASM770v1		assembly from type material
GCF_000007725.1	PRJNA224116	SAMN02604289		representative genome	224915	9	Buchnera aphidicola str. Bp (Baizongia pistaciae)	strain=Bp (Baizongia pistaciae)		latest	Complete Genome	Major	Full	2003-01-29	ASM772v1	Valencia Univ.	GCA_000007725.1	identical	ftp://ftp.ncbi.nlm.nih.gov/genomes/all/GCF/000/007/725/GCF_000007725.1_ASM772v1
GCF_000007745.1	PRJNA224116	SAMN02603473		representative genome	221988	157673	[Mannheimia] succiniciproducens MBEL55E	strain=MBEL55E		latest	Complete Genome	Major	Full	2004-09-17	ASM774v1	Korea Advanced Institute of Science and Technology, Republic of Korea, Yuseong-gu	GCA_000007745.1	identical	ftp://ftp.ncbi.nlm.nih.gov/genomes/all/GCF/000/007/745/GCF_000007745.1_ASM774v1		assembly from type material
GCF_000007865.1	PRJNA224116	SAMN02604086		representative genome	262316	1764	Mycobacterium avium subsp. paratuberculosis K-10	strain=K-10		latest	Complete Genome	Major	Full	2004-01-30	ASM786v1	Univ. Minnesota	GCA_000007865.1	identical	ftp://ftp.ncbi.nlm.nih.gov/genomes/all/GCF/000/007/865/GCF_000007865.1_ASM786v1
GCF_000007905.1	PRJNA224116	SAMN02604097		representative genome	235279	32025	Helicobacter hepaticus ATCC 51449	strain=ATCC 51449		latest	Complete Genome	Major	Full	2003-06-26	ASM790v1	Univ. Wuerzburg	GCA_000007905.1	identical	ftp://ftp.ncbi.nlm.nih.gov/genomes/all/GCF/000/007/905/GCF_000007905.1_ASM790v1
GCF_000007945.1	PRJNA224116	SAMN02604087		representative genome	233412	730	[Haemophilus] ducreyi 35000HP	strain=35000HP		latest	Complete Genome	Major	Full	2003-07-23	ASM794v1	Univ. Ohio	GCA_000007945.1	identical	ftp://ftp.ncbi.nlm.nih.gov/genomes/all/GCF/000/007/945/GCF_000007945.1_ASM794v1
GCF_000008025.1	PRJNA224116	SAMN02604000		representative genome	163164	163164	Wolbachia endosymbiont of Drosophila melanogaster	strain=wMel		latest	Complete Genome	Major	Full	2004-02-05	ASM802v1	TIGR	GCA_000008025.1	identical	ftp://ftp.ncbi.nlm.nih.gov/genomes/all/GCF/000/008/025/GCF_000008025.1_ASM802v1
GCF_000008045.1	PRJNA224116	SAMN02603327		representative genome	257363	785	Rickettsia typhi str. Wilmington	strain=Wilmington		latest	Complete Genome	Major	Full	2004-08-19	ASM804v1	Human Genome Sequencing Center, Baylor College of Medicine	GCA_000008045.1	identical	ftp://ftp.ncbi.nlm.nih.gov/genomes/all/GCF/000/008/045/GCF_000008045.1_ASM804v1		assembly from type material
GCF_000008205.1	PRJNA224116	SAMN02603526		representative genome	262719	2099	Mycoplasma hyopneumoniae J	strain=J		latest	Complete Genome	Major	Full	2005-08-05	ASM820v1	LNCC - Laboratorio Nacional de Computacao Cientifica	GCA_000008205.1	identical	ftp://ftp.ncbi.nlm.nih.gov/genomes/all/GCF/000/008/205/GCF_000008205.1_ASM820v1		assembly from type material
GCF_000008265.1	PRJNA224116	SAMN02603345		representative genome	263820	82076	Picrophilus torridus DSM 9790	strain=DSM 9790		latest	Complete Genome	Major	Full	2004-06-08	ASM826v1	Institut of Microbiology and Genetics, University of Goettingen	GCA_000008265.1	identical	ftp://ftp.ncbi.nlm.nih.gov/genomes/all/GCF/000/008/265/GCF_000008265.1_ASM826v1		assembly from type material
GCF_000008325.1	PRJNA224116	SAMN02603968		representative genome	243233	414	Methylococcus capsulatus str. Bath	strain=Bath		latest	Complete Genome	Major	Full	2005-05-18	ASM832v1	TIGR	GCA_000008325.1	identical	ftp://ftp.ncbi.nlm.nih.gov/genomes/all/GCF/000/008/325/GCF_000008325.1_ASM832v1
GCF_000008345.1	PRJNA224116	SAMN02603281		representative genome	267747	1747	Cutibacterium acnes KPA171202	strain=KPA171202		latest	Complete Genome	Major	Full	2004-07-30	ASM834v1	Goettingen Genomics Laboratory	GCA_000008345.1	identical	ftp://ftp.ncbi.nlm.nih.gov/genomes/all/GCF/000/008/345/GCF_000008345.1_ASM834v1
GCF_000008365.1	PRJNA224116	SAMN03081417		representative genome	267748	2118	Mycoplasma mobile 163K	strain=163K		latest	Complete Genome	Major	Full	2004-05-18	ASM836v1	Broad Institute	GCA_000008365.1	identical	ftp://ftp.ncbi.nlm.nih.gov/genomes/all/GCF/000/008/365/GCF_000008365.1_ASM836v1		assembly from type material
GCF_000008385.1	PRJNA224116	SAMN02603678		representative genome	292805	80849	Wolbachia endosymbiont strain TRS of Brugia malayi			latest	Complete Genome	Major	Full	2005-02-02	ASM838v1	New England Biolabs, Inc.	GCA_000008385.1	identical	ftp://ftp.ncbi.nlm.nih.gov/genomes/all/GCF/000/008/385/GCF_000008385.1_ASM838v1
GCF_000008465.1	PRJNA224116	SAMN02604184		representative genome	283942	135577	Idiomarina loihiensis L2TR	strain=L2TR		latest	Complete Genome	Major	Full	2004-12-02	ASM846v1	University of Hawaii at Manoa	GCA_000008465.1	identical	ftp://ftp.ncbi.nlm.nih.gov/genomes/all/GCF/000/008/465/GCF_000008465.1_ASM846v1		assembly from type material
GCF_000008645.1	PRJNA224116	SAMN02603244		representative genome	187420	145262	Methanothermobacter thermautotrophicus str. Delta H	strain=Delta H		latest	Complete Genome	Major	Full	1999-12-22	ASM864v1	Genome Therapeutics Corporation	GCA_000008645.1	identical	ftp://ftp.ncbi.nlm.nih.gov/genomes/all/GCF/000/008/645/GCF_000008645.1_ASM864v1		assembly from type material
GCF_000008665.1	PRJNA224116	SAMN02603985		representative genome	224325	2234	Archaeoglobus fulgidus DSM 4304	strain=DSM 4304		latest	Complete Genome	Major	Full	1999-12-22	ASM866v1	TIGR	GCA_000008665.1	identical	ftp://ftp.ncbi.nlm.nih.gov/genomes/all/GCF/000/008/665/GCF_000008665.1_ASM866v1		assembly from type material
GCF_000008885.1	PRJNA224116	SAMD00061100		representative genome	36870	51229	Wigglesworthia glossinidia endosymbiont of Glossina brevipalpis			latest	Complete Genome	Major	Full	2004-05-11	ASM888v1	Yale Univ.	GCA_000008885.1	identical	ftp://ftp.ncbi.nlm.nih.gov/genomes/all/GCF/000/008/885/GCF_000008885.1_ASM888v1
GCF_000009125.1	PRJNA224116	SAMEA3138192		representative genome	267608	305	Ralstonia solanacearum GMI1000	strain=GMI1000		latest	Complete Genome	Major	Full	2003-05-06	ASM912v1	Genoscope	GCA_000009125.1	identical	ftp://ftp.ncbi.nlm.nih.gov/genomes/all/GCF/000/009/125/GCF_000009125.1_ASM912v1
GCF_000009145.1	PRJNA224116	SAMEA3138193		representative genome	228410	915	Nitrosomonas europaea ATCC 19718	strain=ATCC 19718		latest	Complete Genome	Major	Full	2003-05-06	ASM914v1	DOE Joint Genome Institute	GCA_000009145.1	identical	ftp://ftp.ncbi.nlm.nih.gov/genomes/all/GCF/000/009/145/GCF_000009145.1_ASM914v1
GCF_000009365.1	PRJNA224116	SAMEA3138202		representative genome	393595	59754	Alcanivorax borkumensis SK2	strain=SK2		latest	Complete Genome	Major	Full	2006-07-24	ASM936v1	German Research Centre for Biotechnology	GCA_000009365.1	identical	ftp://ftp.ncbi.nlm.nih.gov/genomes/all/GCF/000/009/365/GCF_000009365.1_ASM936v1		assembly from type material
GCF_000009545.1	PRJNA224116	SAMEA3138207		representative genome	218495	1349	Streptococcus uberis 0140J	strain=0140J		latest	Complete Genome	Major	Full	2009-01-28	ASM954v1	Sanger Institute	GCA_000009545.1	identical	ftp://ftp.ncbi.nlm.nih.gov/genomes/all/GCF/000/009/545/GCF_000009545.1_ASM954v1
GCF_000009765.2	PRJNA224116	SAMD00061088		representative genome	227882	33903	Streptomyces avermitilis MA-4680 = NBRC 14893	strain=MA-4680		latest	Complete Genome	Minor	Full	2016-03-24	ASM976v2	NITE	GCA_000009765.2	identical	ftp://ftp.ncbi.nlm.nih.gov/genomes/all/GCF/000/009/765/GCF_000009765.2_ASM976v2		assembly from type material
GCF_000009825.1	PRJNA224116	SAMD00061074		representative genome	66692	79880	Bacillus clausii KSM-K16	strain=KSM-K16		latest	Complete Genome	Major	Full	2004-12-30	ASM982v1	Kao Corporation, Biological Science Laboratories, Japan	GCA_000009825.1	identical	ftp://ftp.ncbi.nlm.nih.gov/genomes/all/GCF/000/009/825/GCF_000009825.1_ASM982v1
GCF_000009845.1	PRJNA224116	SAMD00061121		representative genome	262768	100379	Onion yellows phytoplasma OY-M	strain=onion yellows		latest	Complete Genome	Major	Full	2007-12-15	ASM984v1	The University of Tokyo, Japan	GCA_000009845.1	identical	ftp://ftp.ncbi.nlm.nih.gov/genomes/all/GCF/000/009/845/GCF_000009845.1_ASM984v1
GCF_000009865.1	PRJNA224116	SAMD00061066		representative genome	279808	1283	Staphylococcus haemolyticus JCSC1435	strain=JCSC1435		latest	Complete Genome	Major	Full	2005-06-30	ASM986v1	NITE	GCA_000009865.1	identical	ftp://ftp.ncbi.nlm.nih.gov/genomes/all/GCF/000/009/865/GCF_000009865.1_ASM986v1
GCF_000009905.1	PRJNA224116	SAMD00061067		representative genome	292459	2734	Symbiobacterium thermophilum IAM 14863	strain=IAM14863		latest	Complete Genome	Major	Full	2004-09-02	ASM990v1	Kitasato Institute for Life Sciences, Japan	GCA_000009905.1	identical	ftp://ftp.ncbi.nlm.nih.gov/genomes/all/GCF/000/009/905/GCF_000009905.1_ASM990v1		assembly from type material
GCF_000009945.1	PRJNA224116	SAMD00061108		representative genome	264202	83556	Chlamydia felis Fe/C-56	strain=Fe/C-56		latest	Complete Genome	Major	Full	2006-03-09	ASM994v1	Japanese Consortium/Yamaguchi Univ.	GCA_000009945.1	identical	ftp://ftp.ncbi.nlm.nih.gov/genomes/all/GCF/000/009/945/GCF_000009945.1_ASM994v1
GCF_000009965.1	PRJNA224116	SAMD00061071		representative genome	69014	311400	Thermococcus kodakarensis KOD1	strain=KOD1		latest	Complete Genome	Major	Full	2005-01-05	ASM996v1	Kyoto University, Japan	GCA_000009965.1	identical	ftp://ftp.ncbi.nlm.nih.gov/genomes/all/GCF/000/009/965/GCF_000009965.1_ASM996v1		assembly from type material
GCF_000009985.1	PRJNA224116	SAMD00061077		representative genome	342108	84159	Magnetospirillum magneticum AMB-1	strain=AMB-1		latest	Complete Genome	Major	Full	2005-12-01	ASM998v1	Tokyo University of Agriculture and Technology, Japan	GCA_000009985.1	identical	ftp://ftp.ncbi.nlm.nih.gov/genomes/all/GCF/000/009/985/GCF_000009985.1_ASM998v1
GCF_000010065.1	PRJNA224116	SAMD00061073		representative genome	269084	32046	Synechococcus elongatus PCC 6301	strain=PCC 6301		latest	Complete Genome	Major	Full	2004-12-16	ASM1006v1	Nagoya University, Japan	GCA_000010065.1	identical	ftp://ftp.ncbi.nlm.nih.gov/genomes/all/GCF/000/010/065/GCF_000010065.1_ASM1006v1		assembly from type material
GCF_000010125.1	PRJNA224116	SAMD00061076		representative genome	342451	29385	Staphylococcus saprophyticus subsp. saprophyticus ATCC 15305 = NCTC 7292	strain=ATCC 15305		latest	Complete Genome	Major	Full	2005-08-12	ASM1012v1	Kitasato Institute for Life Sciences, Japan	GCA_000010125.1	identical	ftp://ftp.ncbi.nlm.nih.gov/genomes/all/GCF/000/010/125/GCF_000010125.1_ASM1012v1		assembly from type material
GCF_000010145.1	PRJNA224116	SAMD00060917		representative genome	334390	1613	Lactobacillus fermentum IFO 3956	strain=IFO 3956		latest	Complete Genome	Major	Full	2008-04-15	ASM1014v1	Kitasato Institute for Life Sciences	GCA_000010145.1	identical	ftp://ftp.ncbi.nlm.nih.gov/genomes/all/GCF/000/010/145/GCF_000010145.1_ASM1014v1
GCF_000010165.1	PRJNA224116	SAMD00060942		representative genome	358681	1393	Brevibacillus brevis NBRC 100599	strain=NBRC 100599 (= 47)		latest	Complete Genome	Major	Full	2009-04-01	ASM1016v1	National Institute of Technology and Evaluation	GCA_000010165.1	identical	ftp://ftp.ncbi.nlm.nih.gov/genomes/all/GCF/000/010/165/GCF_000010165.1_ASM1016v1
GCF_000010185.1	PRJNA224116	SAMD00060918		representative genome	334413	1260	Finegoldia magna ATCC 29328	strain=ATCC 29328		latest	Complete Genome	Major	Full	2008-02-14	ASM1018v1	Kitasato Institute for Life Sciences	GCA_000010185.1	identical	ftp://ftp.ncbi.nlm.nih.gov/genomes/all/GCF/000/010/185/GCF_000010185.1_ASM1018v1
GCF_000010285.1	PRJNA224116	SAMD00060935		representative genome	378753	72000	Kocuria rhizophila DC2201	strain=DC2201 (= NBRC 103217)		latest	Complete Genome	Major	Full	2008-04-17	ASM1028v1	National Institute of Technology and Evaluation	GCA_000010285.1	identical	ftp://ftp.ncbi.nlm.nih.gov/genomes/all/GCF/000/010/285/GCF_000010285.1_ASM1028v1
GCF_000010305.1	PRJNA224116	SAMD00060909		representative genome	379066	173480	Gemmatimonas aurantiaca T-27	strain=T-27		latest	Complete Genome	Major	Full	2009-04-01	ASM1030v1	National Institute of Technology and Evaluation	GCA_000010305.1	identical	ftp://ftp.ncbi.nlm.nih.gov/genomes/all/GCF/000/010/305/GCF_000010305.1_ASM1030v1		assembly from type material
GCF_000010405.1	PRJNA224116	SAMD00060908		representative genome	412965	410330	Candidatus Vesicomyosocius okutanii HA	strain=HA		latest	Complete Genome	Major	Full	2007-05-08	ASM1040v1	Japan Agency for Maine-Earth Science and Technology	GCA_000010405.1	identical	ftp://ftp.ncbi.nlm.nih.gov/genomes/all/GCF/000/010/405/GCF_000010405.1_ASM1040v1
GCF_000010425.1	PRJNA224116	SAMD00061080		representative genome	367928	1680	Bifidobacterium adolescentis ATCC 15703	strain=ATCC 15703		latest	Complete Genome	Major	Full	2006-12-05	ASM1042v1	Gifu University, Life Science Research Center, Japan	GCA_000010425.1	identical	ftp://ftp.ncbi.nlm.nih.gov/genomes/all/GCF/000/010/425/GCF_000010425.1_ASM1042v1		assembly from type material
GCF_000010505.1	PRJNA224116	SAMD00060922		representative genome	431947	837	Porphyromonas gingivalis ATCC 33277	strain=ATCC 33277		latest	Complete Genome	Major	Full	2008-05-20	ASM1050v1	Kitasato University	GCA_000010505.1	identical	ftp://ftp.ncbi.nlm.nih.gov/genomes/all/GCF/000/010/505/GCF_000010505.1_ASM1050v1		assembly from type material
GCF_000010525.1	PRJNA224116	SAMD00060925		representative genome	438753	7	Azorhizobium caulinodans ORS 571	strain=ORS 571		latest	Complete Genome	Major	Full	2007-10-16	ASM1052v1	University of Tokyo	GCA_000010525.1	identical	ftp://ftp.ncbi.nlm.nih.gov/genomes/all/GCF/000/010/525/GCF_000010525.1_ASM1052v1		assembly from type material
GCF_000010605.1	PRJNA224116	SAMD00060929		representative genome	455632	1911	Streptomyces griseus subsp. griseus NBRC 13350	strain=NBRC 13350		latest	Complete Genome	Major	Full	2008-04-08	ASM1060v1	The University of Tokyo	GCA_000010605.1	identical	ftp://ftp.ncbi.nlm.nih.gov/genomes/all/GCF/000/010/605/GCF_000010605.1_ASM1060v1
GCF_000010625.1	PRJNA224116	SAMD00060936		representative genome	449447	1126	Microcystis aeruginosa NIES-843	strain=NIES-843		latest	Complete Genome	Major	Full	2008-01-24	ASM1062v1	Kazusa DNA Research Institute	GCA_000010625.1	identical	ftp://ftp.ncbi.nlm.nih.gov/genomes/all/GCF/000/010/625/GCF_000010625.1_ASM1062v1		assembly from type material
GCF_000010665.1	PRJNA224116	SAMD00060954		representative genome	573370	184917	Desulfovibrio magneticus RS-1	strain=RS-1		latest	Complete Genome	Major	Full	2009-06-11	ASM1066v1	National Institute of Technology and Evaluation	GCA_000010665.1	identical	ftp://ftp.ncbi.nlm.nih.gov/genomes/all/GCF/000/010/665/GCF_000010665.1_ASM1066v1		assembly from type material
GCF_000010785.1	PRJNA224116	SAMD00060961		representative genome	608538	940	Hydrogenobacter thermophilus TK-6	strain=TK-6		latest	Complete Genome	Major	Full	2010-02-11	ASM1078v1	The University of Tokyo	GCA_000010785.1	identical	ftp://ftp.ncbi.nlm.nih.gov/genomes/all/GCF/000/010/785/GCF_000010785.1_ASM1078v1		assembly from type material
GCF_000010985.1	PRJNA224116	SAMD00060965		representative genome	639282	197162	Deferribacter desulfuricans SSM1	strain=SSM1		latest	Complete Genome	Major	Full	2010-03-05	ASM1098v1	Japan Agency for Marine-Earth Science and Technology	GCA_000010985.1	identical	ftp://ftp.ncbi.nlm.nih.gov/genomes/all/GCF/000/010/985/GCF_000010985.1_ASM1098v1		assembly from type material
GCF_000011025.1	PRJNA224116	SAMD00060968		representative genome	680646	43675	Rothia mucilaginosa DY-18	strain=DY-18		latest	Complete Genome	Major	Full	2010-01-05	ASM1102v1	Department of Bacteriology, Osaka Dental University	GCA_000011025.1	identical	ftp://ftp.ncbi.nlm.nih.gov/genomes/all/GCF/000/011/025/GCF_000011025.1_ASM1102v1
GCF_000011105.1	PRJNA224116	SAMD00061090		representative genome	70601	53953	Pyrococcus horikoshii OT3	strain=OT3		latest	Complete Genome	Major	Full	2004-05-11	ASM1110v1	NITE	GCA_000011105.1	identical	ftp://ftp.ncbi.nlm.nih.gov/genomes/all/GCF/000/011/105/GCF_000011105.1_ASM1110v1		assembly from type material
GCF_000011185.1	PRJNA224116	SAMD00061089		representative genome	273116	50339	Thermoplasma volcanium GSS1	strain=GSS1		latest	Complete Genome	Major	Full	2004-05-11	ASM1118v1	National Institute of Advanced Industrial Science and Technology, Japan	GCA_000011185.1	identical	ftp://ftp.ncbi.nlm.nih.gov/genomes/all/GCF/000/011/185/GCF_000011185.1_ASM1118v1		assembly from type material
GCF_000011205.1	PRJNA224116	SAMD00061096		representative genome	273063	111955	Sulfurisphaera tokodaii str. 7	strain=7		latest	Complete Genome	Major	Full	2004-05-11	ASM1120v1	NITE	GCA_000011205.1	identical	ftp://ftp.ncbi.nlm.nih.gov/genomes/all/GCF/000/011/205/GCF_000011205.1_ASM1120v1		assembly from type material
GCF_000011225.1	PRJNA224116	SAMD00061084		representative genome	272633	28227	Mycoplasma penetrans HF-2	strain=HF-2		latest	Complete Genome	Major	Full	2004-05-11	ASM1122v1	NIID Japan	GCA_000011225.1	identical	ftp://ftp.ncbi.nlm.nih.gov/genomes/all/GCF/000/011/225/GCF_000011225.1_ASM1122v1
GCF_000011245.1	PRJNA224116	SAMD00061101		representative genome	221109	182710	Oceanobacillus iheyensis HTE831	strain=HTE831		latest	Complete Genome	Major	Full	2004-02-19	ASM1124v1	JAMSTEC	GCA_000011245.1	identical	ftp://ftp.ncbi.nlm.nih.gov/genomes/all/GCF/000/011/245/GCF_000011245.1_ASM1124v1		assembly from type material
GCF_000011305.1	PRJNA224116	SAMD00061103		representative genome	196164	152794	Corynebacterium efficiens YS-314	strain=YS-314		latest	Complete Genome	Major	Full	2004-05-11	ASM1130v1	NITE	GCA_000011305.1	identical	ftp://ftp.ncbi.nlm.nih.gov/genomes/all/GCF/000/011/305/GCF_000011305.1_ASM1130v1		assembly from type material
GCF_000011465.1	PRJNA224116	SAMEA3138209		representative genome	59919	1219	Prochlorococcus marinus subsp. pastoris str. CCMP1986	strain=MED4		latest	Complete Genome	Major	Full	2003-08-18	ASM1146v1	DOE Joint Genome Institute	GCA_000011465.1	identical	ftp://ftp.ncbi.nlm.nih.gov/genomes/all/GCF/000/011/465/GCF_000011465.1_ASM1146v1
GCF_000011485.1	PRJNA224116	SAMEA3138210		representative genome	74547	1219	Prochlorococcus marinus str. MIT 9313	strain=MIT9313		latest	Complete Genome	Major	Full	2003-08-18	ASM1148v1	DOE Joint Genome Institute	GCA_000011485.1	identical	ftp://ftp.ncbi.nlm.nih.gov/genomes/all/GCF/000/011/485/GCF_000011485.1_ASM1148v1
GCF_000011645.1	PRJNA224116	SAMN02603685		representative genome	279010	1402	Bacillus licheniformis DSM 13 = ATCC 14580	strain=ATCC 14580; DSM 13		latest	Complete Genome	Major	Full	2007-04-26	ASM1164v1	Novozymes Biotech	GCA_000011645.1	identical	ftp://ftp.ncbi.nlm.nih.gov/genomes/all/GCF/000/011/645/GCF_000011645.1_ASM1164v1		assembly from type material
GCF_000011685.1	PRJNA224116	SAMN02603293		representative genome	290633	442	Gluconobacter oxydans 621H	strain=621H		latest	Complete Genome	Major	Full	2005-01-21	ASM1168v1	Gottingen Genomics Laboratory	GCA_000011685.1	identical	ftp://ftp.ncbi.nlm.nih.gov/genomes/all/GCF/000/011/685/GCF_000011685.1_ASM1168v1
GCF_000011905.1	PRJNA224116	SAMN02603990		representative genome	243164	61435	Dehalococcoides mccartyi 195	strain=195		latest	Complete Genome	Major	Full	2005-01-07	ASM1190v1	TIGR	GCA_000011905.1	identical	ftp://ftp.ncbi.nlm.nih.gov/genomes/all/GCF/000/011/905/GCF_000011905.1_ASM1190v1		assembly from type material
GCF_000011965.2	PRJNA224116	SAMN02604003		representative genome	246200	89184	Ruegeria pomeroyi DSS-3	strain=DSS-3		latest	Complete Genome	Major	Full	2013-12-10	ASM1196v2	TIGR	GCA_000011965.2	identical	ftp://ftp.ncbi.nlm.nih.gov/genomes/all/GCF/000/011/965/GCF_000011965.2_ASM1196v2		assembly from type material
GCF_000012085.2	PRJNA224116	SAMN02603508		representative genome	314724	142	Borrelia turicatae 91E135	strain=91E135	Oz1	latest	Complete Genome	Major	Full	2017-07-05	ASM1208v2	Laboratory of Human Bacterial Pathenogenesis, Rocky Mountain Laboratories, NIAID	GCA_000012085.2	identical	ftp://ftp.ncbi.nlm.nih.gov/genomes/all/GCF/000/012/085/GCF_000012085.2_ASM1208v2		assembly designated as reftype
GCF_000012145.1	PRJNA224116	SAMN02603143		representative genome	315456	42862	Rickettsia felis URRWXCal2	strain=URRWXCal2; California 2		latest	Complete Genome	Major	Full	2005-06-07	ASM1214v1	CNRS	GCA_000012145.1	identical	ftp://ftp.ncbi.nlm.nih.gov/genomes/all/GCF/000/012/145/GCF_000012145.1_ASM1214v1		assembly from type material
GCF_000012225.1	PRJNA224116	SAMN02603687		representative genome	322098	229545	Aster yellows witches'-broom phytoplasma AYWB			latest	Complete Genome	Major	Full	2006-01-11	ASM1222v1	Ohio State University	GCA_000012225.1	identical	ftp://ftp.ncbi.nlm.nih.gov/genomes/all/GCF/000/012/225/GCF_000012225.1_ASM1222v1
GCF_000012285.1	PRJNA224116	SAMN02603173		representative genome	330779	2285	Sulfolobus acidocaldarius DSM 639	strain=DSM 639		latest	Complete Genome	Major	Full	2005-07-05	ASM1228v1	Danish Archaea Centre	GCA_000012285.1	identical	ftp://ftp.ncbi.nlm.nih.gov/genomes/all/GCF/000/012/285/GCF_000012285.1_ASM1228v1		assembly from type material
GCF_000012305.1	PRJNA224116	SAMN02598544		representative genome	259536	334543	Psychrobacter arcticus 273-4	strain=273-4		latest	Complete Genome	Major	Full	2005-07-20	ASM1230v1	DOE Joint Genome Institute	GCA_000012305.1	identical	ftp://ftp.ncbi.nlm.nih.gov/genomes/all/GCF/000/012/305/GCF_000012305.1_ASM1230v1		assembly from type material
GCF_000012325.1	PRJNA224116	SAMN02604001		representative genome	167879	28229	Colwellia psychrerythraea 34H	strain=34H; BAA-681		latest	Complete Genome	Major	Full	2005-07-26	ASM1232v1	TIGR	GCA_000012325.1	identical	ftp://ftp.ncbi.nlm.nih.gov/genomes/all/GCF/000/012/325/GCF_000012325.1_ASM1232v1
GCF_000012385.1	PRJNA224116	SAMN02603144		representative genome	336407	33990	Rickettsia bellii RML369-C	strain=RML369-C		latest	Complete Genome	Major	Full	2006-04-05	ASM1238v1	CNRS	GCA_000012385.1	identical	ftp://ftp.ncbi.nlm.nih.gov/genomes/all/GCF/000/012/385/GCF_000012385.1_ASM1238v1		assembly from type material
GCF_000012405.1	PRJNA224116	SAMN02598543		representative genome	269800	2021	Thermobifida fusca YX	strain=YX		latest	Complete Genome	Major	Full	2005-08-08	ASM1240v1	DOE Joint Genome Institute	GCA_000012405.1	identical	ftp://ftp.ncbi.nlm.nih.gov/genomes/all/GCF/000/012/405/GCF_000012405.1_ASM1240v1
GCF_000012425.1	PRJNA224116	SAMN02598546		representative genome	159087	259537	Dechloromonas aromatica RCB	strain=RCB		latest	Complete Genome	Major	Full	2005-08-05	ASM1242v1	DOE Joint Genome Institute	GCA_000012425.1	identical	ftp://ftp.ncbi.nlm.nih.gov/genomes/all/GCF/000/012/425/GCF_000012425.1_ASM1242v1
GCF_000012465.1	PRJNA224116	SAMN00623057		representative genome	59920	1219	Prochlorococcus marinus str. NATL2A	strain=NATL2A		latest	Complete Genome	Major	Full	2007-08-09	ASM1246v1	DOE Joint Genome Institute	GCA_000012465.1	identical	ftp://ftp.ncbi.nlm.nih.gov/genomes/all/GCF/000/012/465/GCF_000012465.1_ASM1246v1
GCF_000012485.1	PRJNA224116	SAMN02598284		representative genome	319225	1100	Pelodictyon luteolum DSM 273	strain=DSM 273		latest	Complete Genome	Major	Full	2005-10-26	ASM1248v1	DOE Joint Genome Institute	GCA_000012485.1	identical	ftp://ftp.ncbi.nlm.nih.gov/genomes/all/GCF/000/012/485/GCF_000012485.1_ASM1248v1		assembly from type material
GCF_000012545.1	PRJNA224116	SAMN02604180		representative genome	339860	2317	Methanosphaera stadtmanae DSM 3091	strain=DSM 3091		latest	Complete Genome	Major	Full	2006-01-05	ASM1254v1	University of Goettingen	GCA_000012545.1	identical	ftp://ftp.ncbi.nlm.nih.gov/genomes/all/GCF/000/012/545/GCF_000012545.1_ASM1254v1		assembly from type material
GCF_000012565.1	PRJNA224116	SAMN02598261		representative genome	269484	944	Ehrlichia canis str. Jake	strain=Jake		latest	Complete Genome	Major	Full	2005-08-12	ASM1256v1	DOE Joint Genome Institute	GCA_000012565.1	identical	ftp://ftp.ncbi.nlm.nih.gov/genomes/all/GCF/000/012/565/GCF_000012565.1_ASM1256v1
GCF_000012585.1	PRJNA224116	SAMN02598328		representative genome	340177	337090	Chlorobium chlorochromatii CaD3	strain=CaD3		latest	Complete Genome	Major	Full	2005-10-26	ASM1258v1	DOE Joint Genome Institute	GCA_000012585.1	identical	ftp://ftp.ncbi.nlm.nih.gov/genomes/all/GCF/000/012/585/GCF_000012585.1_ASM1258v1
GCF_000012605.1	PRJNA224116	SAMN02598288		representative genome	317025	39765	Hydrogenovibrio crunogenus XCL-2	strain=XCL-2		latest	Complete Genome	Major	Full	2006-07-27	ASM1260v1	DOE Joint Genome Institute	GCA_000012605.1	identical	ftp://ftp.ncbi.nlm.nih.gov/genomes/all/GCF/000/012/605/GCF_000012605.1_ASM1260v1
GCF_000012645.1	PRJNA224116	SAMN02598321		representative genome	74546	1219	Prochlorococcus marinus str. MIT 9312	strain=MIT 9312		latest	Complete Genome	Major	Full	2005-11-02	ASM1264v1	DOE Joint Genome Institute	GCA_000012645.1	identical	ftp://ftp.ncbi.nlm.nih.gov/genomes/all/GCF/000/012/645/GCF_000012645.1_ASM1264v1
GCF_000012665.1	PRJNA224116	SAMN02598492		representative genome	207559	58180	Desulfovibrio alaskensis G20	strain=G20		latest	Complete Genome	Major	Full	2005-10-28	ASM1266v1	DOE Joint Genome Institute	GCA_000012665.1	identical	ftp://ftp.ncbi.nlm.nih.gov/genomes/all/GCF/000/012/665/GCF_000012665.1_ASM1266v1
GCF_000012685.1	PRJNA224116	SAMN02604018		representative genome	246197	34	Myxococcus xanthus DK 1622	strain=DK 1622		latest	Complete Genome	Major	Full	2006-06-07	ASM1268v1	TIGR	GCA_000012685.1	identical	ftp://ftp.ncbi.nlm.nih.gov/genomes/all/GCF/000/012/685/GCF_000012685.1_ASM1268v1
GCF_000012725.1	PRJNA224116	SAMN02598308		representative genome	323098	913	Nitrobacter winogradskyi Nb-255	strain=Nb-255		latest	Complete Genome	Major	Full	2005-09-12	ASM1272v1	DOE Joint Genome Institute	GCA_000012725.1	identical	ftp://ftp.ncbi.nlm.nih.gov/genomes/all/GCF/000/012/725/GCF_000012725.1_ASM1272v1		assembly from type material
GCF_000012745.1	PRJNA224116	SAMN02598291		representative genome	292415	36861	Thiobacillus denitrificans ATCC 25259	strain=ATCC 25259		latest	Complete Genome	Major	Full	2005-09-01	ASM1274v1	DOE Joint Genome Institute	GCA_000012745.1	identical	ftp://ftp.ncbi.nlm.nih.gov/genomes/all/GCF/000/012/745/GCF_000012745.1_ASM1274v1
GCF_000012765.1	PRJNA224116	SAMN02603434		representative genome	340047	2095	Mycoplasma capricolum subsp. capricolum ATCC 27343	strain=ATCC 27343		latest	Complete Genome	Major	Full	2005-12-06	ASM1276v1	J. Craig Venter Institute	GCA_000012765.1	identical	ftp://ftp.ncbi.nlm.nih.gov/genomes/all/GCF/000/012/765/GCF_000012765.1_ASM1276v1		assembly from type material
GCF_000012805.1	PRJNA224116	SAMN02598329		representative genome	323261	1229	Nitrosococcus oceani ATCC 19707	strain=ATCC 19707		latest	Complete Genome	Major	Full	2005-10-04	ASM1280v1	DOE Joint Genome Institute	GCA_000012805.1	identical	ftp://ftp.ncbi.nlm.nih.gov/genomes/all/GCF/000/012/805/GCF_000012805.1_ASM1280v1		assembly from type material
GCF_000012825.1	PRJNA224116	SAMN02604309		representative genome	435590	821	Bacteroides vulgatus ATCC 8482	strain=ATCC 8482		latest	Complete Genome	Major	Full	2007-06-27	ASM1282v1	Washington University (WashU)	GCA_000012825.1	identical	ftp://ftp.ncbi.nlm.nih.gov/genomes/all/GCF/000/012/825/GCF_000012825.1_ASM1282v1		assembly from type material
GCF_000012845.1	PRJNA224116	SAMN02604310		representative genome	435591	823	Parabacteroides distasonis ATCC 8503	strain=ATCC 8503		latest	Complete Genome	Major	Full	2007-06-27	ASM1284v1	Washington University (WashU)	GCA_000012845.1	identical	ftp://ftp.ncbi.nlm.nih.gov/genomes/all/GCF/000/012/845/GCF_000012845.1_ASM1284v1		assembly from type material
GCF_000012865.1	PRJNA224116	SAMN02603998		representative genome	246194	129958	Carboxydothermus hydrogenoformans Z-2901	strain=Z-2901		latest	Complete Genome	Major	Full	2005-10-21	ASM1286v1	TIGR	GCA_000012865.1	identical	ftp://ftp.ncbi.nlm.nih.gov/genomes/all/GCF/000/012/865/GCF_000012865.1_ASM1286v1		assembly from type material
GCF_000012885.1	PRJNA224116	SAMN02598295		representative genome	338963	19	Pelobacter carbinolicus DSM 2380	strain=DSM 2380		latest	Complete Genome	Major	Full	2006-03-30	ASM1288v1	DOE Joint Genome Institute	GCA_000012885.1	identical	ftp://ftp.ncbi.nlm.nih.gov/genomes/all/GCF/000/012/885/GCF_000012885.1_ASM1288v1		assembly from type material
GCF_000012925.1	PRJNA224116	SAMN02598399		representative genome	269799	28232	Geobacter metallireducens GS-15	strain=GS-15		latest	Complete Genome	Major	Full	2005-10-27	ASM1292v1	DOE Joint Genome Institute	GCA_000012925.1	identical	ftp://ftp.ncbi.nlm.nih.gov/genomes/all/GCF/000/012/925/GCF_000012925.1_ASM1292v1		assembly from type material
GCF_000012965.1	PRJNA224116	SAMN02598289		representative genome	326298	39766	Sulfurimonas denitrificans DSM 1251	strain=DSM 1251		latest	Complete Genome	Major	Full	2005-11-01	ASM1296v1	US DOE Joint Genome Institute (JGI-PGF)	GCA_000012965.1	identical	ftp://ftp.ncbi.nlm.nih.gov/genomes/all/GCF/000/012/965/GCF_000012965.1_ASM1296v1		assembly from type material
GCF_000012985.1	PRJNA224116	SAMN02603483		representative genome	349521	158327	Hahella chejuensis KCTC 2396	strain=KCTC 2396		latest	Complete Genome	Major	Full	2005-12-14	ASM1298v1	Korea Research Institute of Bioscience and Biotechnology (KRIBB)	GCA_000012985.1	identical	ftp://ftp.ncbi.nlm.nih.gov/genomes/all/GCF/000/012/985/GCF_000012985.1_ASM1298v1		assembly from type material
GCF_000013005.1	PRJNA224116	SAMN00622970		representative genome	314225	39960	Erythrobacter litoralis HTCC2594	strain=HTCC2594		latest	Complete Genome	Major	Full	2006-01-11	ASM1300v1	The Gordon and Betty Moore Foundation Marine Microbiology Initiative	GCA_000013005.1	identical	ftp://ftp.ncbi.nlm.nih.gov/genomes/all/GCF/000/013/005/GCF_000013005.1_ASM1300v1
GCF_000013025.1	PRJNA224116	SAMN02604041		representative genome	228405	81032	Hyphomonas neptunium ATCC 15444	strain=ATCC 15444		latest	Complete Genome	Major	Full	2006-09-18	ASM1302v1	TIGR	GCA_000013025.1	identical	ftp://ftp.ncbi.nlm.nih.gov/genomes/all/GCF/000/013/025/GCF_000013025.1_ASM1302v1		assembly from type material
GCF_000013125.1	PRJNA224116	SAMN02604015		representative genome	212042	948	Anaplasma phagocytophilum str. HZ	strain=HZ		latest	Complete Genome	Major	Full	2006-02-21	ASM1312v1	TIGR	GCA_000013125.1	identical	ftp://ftp.ncbi.nlm.nih.gov/genomes/all/GCF/000/013/125/GCF_000013125.1_ASM1312v1
GCF_000013145.1	PRJNA224116	SAMN02604010		representative genome	205920	945	Ehrlichia chaffeensis str. Arkansas	strain=Arkansas		latest	Complete Genome	Major	Full	2006-02-21	ASM1314v1	TIGR	GCA_000013145.1	identical	ftp://ftp.ncbi.nlm.nih.gov/genomes/all/GCF/000/013/145/GCF_000013145.1_ASM1314v1		assembly from type material
GCF_000013165.1	PRJNA224116	SAMN02604016		representative genome	222891	951	Neorickettsia sennetsu str. Miyayama	strain=Miyayama		latest	Complete Genome	Major	Full	2006-02-21	ASM1316v1	TIGR	GCA_000013165.1	identical	ftp://ftp.ncbi.nlm.nih.gov/genomes/all/GCF/000/013/165/GCF_000013165.1_ASM1316v1		assembly from type material
GCF_000013285.1	PRJNA224116	SAMN02604008		representative genome	195103	1502	Clostridium perfringens ATCC 13124	strain=ATCC 13124		latest	Complete Genome	Major	Full	2006-07-25	ASM1328v1	TIGR	GCA_000013285.1	identical	ftp://ftp.ncbi.nlm.nih.gov/genomes/all/GCF/000/013/285/GCF_000013285.1_ASM1328v1		assembly from type material
GCF_000013325.1	PRJNA224116	SAMN02598432		representative genome	279238	48935	Novosphingobium aromaticivorans DSM 12444	strain=DSM 12444		latest	Complete Genome	Major	Full	2007-04-18	ASM1332v1	US DOE Joint Genome Institute	GCA_000013325.1	identical	ftp://ftp.ncbi.nlm.nih.gov/genomes/all/GCF/000/013/325/GCF_000013325.1_ASM1332v1		assembly from type material
GCF_000013345.1	PRJNA224116	SAMN02199398		representative genome	106370	106370	Frankia casuarinae	strain=CcI3		latest	Complete Genome	Major	Full	2006-02-06	ASM1334v1	US DOE Joint Genome Institute (JGI-PGF)	GCA_000013345.1	identical	ftp://ftp.ncbi.nlm.nih.gov/genomes/all/GCF/000/013/345/GCF_000013345.1_ASM1334v1		assembly from type material
GCF_000013365.1	PRJNA224116	SAMN02598335		representative genome	316058	1076	Rhodopseudomonas palustris HaA2	strain=HaA2		latest	Complete Genome	Major	Full	2006-02-06	ASM1336v1	DOE Joint Genome Institute	GCA_000013365.1	identical	ftp://ftp.ncbi.nlm.nih.gov/genomes/all/GCF/000/013/365/GCF_000013365.1_ASM1336v1
GCF_000013405.1	PRJNA224116	SAMN02603418		representative genome	56780	316277	Syntrophus aciditrophicus SB	strain=SB		latest	Complete Genome	Major	Full	2006-01-26	ASM1340v1	Integrated Genomics	GCA_000013405.1	identical	ftp://ftp.ncbi.nlm.nih.gov/genomes/all/GCF/000/013/405/GCF_000013405.1_ASM1340v1		assembly from type material
GCF_000013445.1	PRJNA224116	SAMN02598287		representative genome	323259	2203	Methanospirillum hungatei JF-1	strain=JF-1		latest	Complete Genome	Major	Full	2006-02-17	ASM1344v1	DOE Joint Genome Institute	GCA_000013445.1	identical	ftp://ftp.ncbi.nlm.nih.gov/genomes/all/GCF/000/013/445/GCF_000013445.1_ASM1344v1		assembly from type material
GCF_000013605.1	PRJNA224116	SAMN02598320		representative genome	338969	192843	Rhodoferax ferrireducens T118	strain=DSM 15236		latest	Complete Genome	Major	Full	2006-03-10	ASM1360v1	DOE Joint Genome Institute	GCA_000013605.1	identical	ftp://ftp.ncbi.nlm.nih.gov/genomes/all/GCF/000/013/605/GCF_000013605.1_ASM1360v1		assembly from type material
GCF_000013645.1	PRJNA224116	SAMN02598451		representative genome	266265	36873	Paraburkholderia xenovorans LB400	strain=LB400		latest	Complete Genome	Major	Full	2006-04-10	ASM1364v1	DOE Joint Genome Institute	GCA_000013645.1	identical	ftp://ftp.ncbi.nlm.nih.gov/genomes/all/GCF/000/013/645/GCF_000013645.1_ASM1364v1		assembly from type material
GCF_000013665.1	PRJNA224116	SAMN02598483		representative genome	203122	86304	Saccharophagus degradans 2-40	strain=2-40		latest	Complete Genome	Major	Full	2006-03-17	ASM1366v1	DOE Joint Genome Institute	GCA_000013665.1	identical	ftp://ftp.ncbi.nlm.nih.gov/genomes/all/GCF/000/013/665/GCF_000013665.1_ASM1366v1		assembly from type material
GCF_000013725.1	PRJNA224116	SAMN02598545		representative genome	259564	29291	Methanococcoides burtonii DSM 6242	strain=DSM 6242		latest	Complete Genome	Major	Full	2006-04-10	ASM1372v1	DOE Joint Genome Institute	GCA_000013725.1	identical	ftp://ftp.ncbi.nlm.nih.gov/genomes/all/GCF/000/013/725/GCF_000013725.1_ASM1372v1		assembly from type material
GCF_000013745.1	PRJNA224116	SAMN02598337		representative genome	316056	1076	Rhodopseudomonas palustris BisB18	strain=BisB18		latest	Complete Genome	Major	Full	2006-03-21	ASM1374v1	DOE Joint Genome Institute	GCA_000013745.1	identical	ftp://ftp.ncbi.nlm.nih.gov/genomes/all/GCF/000/013/745/GCF_000013745.1_ASM1374v1
GCF_000013765.1	PRJNA224116	SAMN02598300		representative genome	318161	192073	Shewanella denitrificans OS217	strain=OS217		latest	Complete Genome	Major	Full	2006-04-10	ASM1376v1	DOE Joint Genome Institute	GCA_000013765.1	identical	ftp://ftp.ncbi.nlm.nih.gov/genomes/all/GCF/000/013/765/GCF_000013765.1_ASM1376v1		assembly from type material
GCF_000013885.1	PRJNA224116	SAMN02598307		representative genome	323097	912	Nitrobacter hamburgensis X14	strain=X14		latest	Complete Genome	Major	Full	2006-04-11	ASM1388v1	DOE Joint Genome Institute	GCA_000013885.1	identical	ftp://ftp.ncbi.nlm.nih.gov/genomes/all/GCF/000/013/885/GCF_000013885.1_ASM1388v1		assembly from type material
GCF_000013945.1	PRJNA224116	SAMN02603615		representative genome	355276	174	Leptospira borgpetersenii serovar Hardjo-bovis str. L550	strain=L550		latest	Complete Genome	Major	Full	2006-10-13	ASM1394v1	Monash University	GCA_000013945.1	identical	ftp://ftp.ncbi.nlm.nih.gov/genomes/all/GCF/000/013/945/GCF_000013945.1_ASM1394v1
GCF_000013985.1	PRJNA224116	SAMN02598319		representative genome	317655	117207	Sphingopyxis alaskensis RB2256	strain=RB2256		latest	Complete Genome	Major	Full	2006-05-18	ASM1398v1	DOE Joint Genome Institute	GCA_000013985.1	identical	ftp://ftp.ncbi.nlm.nih.gov/genomes/all/GCF/000/013/985/GCF_000013985.1_ASM1398v1		assembly from type material
GCF_000014025.1	PRJNA224116	SAMN02604276		representative genome	367737	28197	Arcobacter butzleri RM4018	strain=RM4018		latest	Complete Genome	Major	Full	2007-09-27	ASM1402v1	USDA - Agricultural Research Service, USA	GCA_000014025.1	identical	ftp://ftp.ncbi.nlm.nih.gov/genomes/all/GCF/000/014/025/GCF_000014025.1_ASM1402v1		assembly from type material
GCF_000014045.1	PRJNA224116	SAMN02602987		representative genome	375451	2434	Roseobacter denitrificans OCh 114	strain=OCh 114		latest	Complete Genome	Major	Full	2006-09-22	ASM1404v1	Arizona State University/TGen	GCA_000014045.1	identical	ftp://ftp.ncbi.nlm.nih.gov/genomes/all/GCF/000/014/045/GCF_000014045.1_ASM1404v1		assembly from type material
GCF_000014125.1	PRJNA224116	SAMN02603464		representative genome	386415	1542	Clostridium novyi NT	strain=NT		latest	Complete Genome	Major	Full	2006-11-17	ASM1412v1	Johns Hopkins Kimmel Comprehensive Cancer Center	GCA_000014125.1	identical	ftp://ftp.ncbi.nlm.nih.gov/genomes/all/GCF/000/014/125/GCF_000014125.1_ASM1412v1		assembly from proxytype material
GCF_000014145.1	PRJNA224116	SAMN02598536		representative genome	269798	985	Cytophaga hutchinsonii ATCC 33406	strain=ATCC 33406		latest	Complete Genome	Major	Full	2006-07-11	ASM1414v1	DOE Joint Genome Institute	GCA_000014145.1	identical	ftp://ftp.ncbi.nlm.nih.gov/genomes/all/GCF/000/014/145/GCF_000014145.1_ASM1414v1		assembly from type material
GCF_000014185.1	PRJNA224116	SAMN02598258		representative genome	266117	49319	Rubrobacter xylanophilus DSM 9941	strain=DSM 9941		latest	Complete Genome	Major	Full	2006-06-09	ASM1418v1	DOE Joint Genome Institute	GCA_000014185.1	identical	ftp://ftp.ncbi.nlm.nih.gov/genomes/all/GCF/000/014/185/GCF_000014185.1_ASM1418v1		assembly from type material
GCF_000014225.1	PRJNA224116	SAMN02598305		representative genome	342610	288	Pseudoalteromonas atlantica T6c	strain=T6c		latest	Complete Genome	Major	Full	2006-06-28	ASM1422v1	DOE Joint Genome Institute	GCA_000014225.1	identical	ftp://ftp.ncbi.nlm.nih.gov/genomes/all/GCF/000/014/225/GCF_000014225.1_ASM1422v1
GCF_000014265.1	PRJNA224116	SAMN02598485		representative genome	203124	1206	Trichodesmium erythraeum IMS101	strain=IMS101		latest	Complete Genome	Major	Full	2006-07-06	ASM1426v1	DOE Joint Genome Institute	GCA_000014265.1	identical	ftp://ftp.ncbi.nlm.nih.gov/genomes/all/GCF/000/014/265/GCF_000014265.1_ASM1426v1
GCF_000014285.2	PRJNA224116	SAMN02603769		representative genome	391165	364410	Granulibacter bethesdensis CGDNIH1	strain=CGDNIH1		latest	Complete Genome	Major	Full	2017-08-28	ASM1428v2	Rocky Mountain Laboratories, National Institutes of Allergy and Infectious Disease, The National Institutes of Health	GCA_000014285.2	identical	ftp://ftp.ncbi.nlm.nih.gov/genomes/all/GCF/000/014/285/GCF_000014285.2_ASM1428v2		assembly from type material
GCF_000014345.1	PRJNA224116	SAMN02604083		representative genome	293613	788	Rickettsia canadensis str. McKiel	strain=McKiel		latest	Complete Genome	Major	Full	2007-10-01	ASM1434v1	Univ. Iowa	GCA_000014345.1	identical	ftp://ftp.ncbi.nlm.nih.gov/genomes/all/GCF/000/014/345/GCF_000014345.1_ASM1434v1
GCF_000014385.1	PRJNA224116	SAMN02598484		representative genome	203123	1247	Oenococcus oeni PSU-1	strain=PSU-1		latest	Complete Genome	Major	Full	2006-10-13	ASM1438v1	US DOE Joint Genome Institute (JGI), The Lactic Acid Bacteria Genome Consortium and Fidelity Systems Inc.	GCA_000014385.1	identical	ftp://ftp.ncbi.nlm.nih.gov/genomes/all/GCF/000/014/385/GCF_000014385.1_ASM1438v1
GCF_000014425.1	PRJNA224116	SAMN02598542		representative genome	324831	1596	Lactobacillus gasseri ATCC 33323 = JCM 1131	strain=ATCC 33323		latest	Complete Genome	Major	Full	2006-10-13	ASM1442v1	US DOE Joint Genome Institute (JGI), The Lactic Acid Bacteria Genome Consortium and Fidelity Systems Inc.	GCA_000014425.1	identical	ftp://ftp.ncbi.nlm.nih.gov/genomes/all/GCF/000/014/425/GCF_000014425.1_ASM1442v1		assembly from type material
GCF_000014445.1	PRJNA224116	SAMN02598482		representative genome	203120	1245	Leuconostoc mesenteroides subsp. mesenteroides ATCC 8293	strain=ATCC 8293		latest	Complete Genome	Major	Full	2006-10-13	ASM1444v1	US DOE Joint Genome Institute (JGI), The Lactic Acid Bacteria Genome Consortium and Fidelity Systems Inc.	GCA_000014445.1	identical	ftp://ftp.ncbi.nlm.nih.gov/genomes/all/GCF/000/014/445/GCF_000014445.1_ASM1444v1		assembly from type material
GCF_000014465.1	PRJNA224116	SAMN02598532		representative genome	387344	1580	Lactobacillus brevis ATCC 367	strain=ATCC 367		latest	Complete Genome	Major	Full	2006-10-13	ASM1446v1	US DOE Joint Genome Institute (JGI), The Lactic Acid Bacteria Genome Consortium and Fidelity Systems Inc.	GCA_000014465.1	identical	ftp://ftp.ncbi.nlm.nih.gov/genomes/all/GCF/000/014/465/GCF_000014465.1_ASM1446v1
GCF_000014505.1	PRJNA224116	SAMN02598525		representative genome	278197	1255	Pediococcus pentosaceus ATCC 25745	strain=ATCC 25745		latest	Complete Genome	Major	Full	2006-10-13	ASM1450v1	US DOE Joint Genome Institute (JGI), The Lactic Acid Bacteria Genome Consortium and Fidelity Systems Inc.	GCA_000014505.1	identical	ftp://ftp.ncbi.nlm.nih.gov/genomes/all/GCF/000/014/505/GCF_000014505.1_ASM1450v1
GCF_000014565.1	PRJNA224116	SAMN02604146		representative genome	101510	132919	Rhodococcus jostii RHA1	strain=RHA1		latest	Complete Genome	Major	Full	2006-07-28	ASM1456v1	University of British Columbia	GCA_000014565.1	identical	ftp://ftp.ncbi.nlm.nih.gov/genomes/all/GCF/000/014/565/GCF_000014565.1_ASM1456v1
GCF_000014705.1	PRJNA224116	SAMN02598301		representative genome	318167	56812	Shewanella frigidimarina NCIMB 400	strain=NCIMB 400		latest	Complete Genome	Major	Full	2006-09-14	ASM1470v1	DOE Joint Genome Institute	GCA_000014705.1	identical	ftp://ftp.ncbi.nlm.nih.gov/genomes/all/GCF/000/014/705/GCF_000014705.1_ASM1470v1
GCF_000014725.1	PRJNA224116	SAMN02598286		representative genome	335541	863	Syntrophomonas wolfei subsp. wolfei str. Goettingen G311	strain=Goettingen G311		latest	Complete Genome	Major	Full	2006-09-14	ASM1472v1	DOE Joint Genome Institute	GCA_000014725.1	identical	ftp://ftp.ncbi.nlm.nih.gov/genomes/all/GCF/000/014/725/GCF_000014725.1_ASM1472v1		assembly from type material
GCF_000014745.1	PRJNA224116	SAMN02598382		representative genome	394221	74318	Maricaulis maris MCS10	strain=MCS10		latest	Complete Genome	Major	Full	2006-09-14	ASM1474v1	DOE Joint Genome Institute	GCA_000014745.1	identical	ftp://ftp.ncbi.nlm.nih.gov/genomes/all/GCF/000/014/745/GCF_000014745.1_ASM1474v1
GCF_000014765.1	PRJNA224116	SAMN02598323		representative genome	335283	916	Nitrosomonas eutropha C91	strain=C91		latest	Complete Genome	Major	Full	2006-09-13	ASM1476v1	DOE Joint Genome Institute	GCA_000014765.1	identical	ftp://ftp.ncbi.nlm.nih.gov/genomes/all/GCF/000/014/765/GCF_000014765.1_ASM1476v1
GCF_000014785.1	PRJNA224116	SAMN02598349		representative genome	187272	351052	Alkalilimnicola ehrlichii MLHE-1	strain=MLHE-1		latest	Complete Genome	Major	Full	2006-09-12	ASM1478v1	DOE Joint Genome Institute	GCA_000014785.1	identical	ftp://ftp.ncbi.nlm.nih.gov/genomes/all/GCF/000/014/785/GCF_000014785.1_ASM1478v1		assembly from type material
GCF_000014825.1	PRJNA224116	SAMN02598338		representative genome	316055	1076	Rhodopseudomonas palustris BisA53	strain=BisA53		latest	Complete Genome	Major	Full	2006-10-04	ASM1482v1	DOE Joint Genome Institute	GCA_000014825.1	identical	ftp://ftp.ncbi.nlm.nih.gov/genomes/all/GCF/000/014/825/GCF_000014825.1_ASM1482v1
GCF_000014865.1	PRJNA224116	SAMN02598452		representative genome	156889	1124597	Magnetococcus marinus MC-1	strain=MC-1		latest	Complete Genome	Major	Full	2006-11-08	ASM1486v1	US DOE Joint Genome Institute	GCA_000014865.1	identical	ftp://ftp.ncbi.nlm.nih.gov/genomes/all/GCF/000/014/865/GCF_000014865.1_ASM1486v1		assembly from type material
GCF_000014885.1	PRJNA224116	SAMN02603456		representative genome	225849	404011	Shewanella piezotolerans WP3	strain=WP3		latest	Complete Genome	Major	Full	2008-11-13	ASM1488v1	James D. Watson Institute of Genome Sciences	GCA_000014885.1	identical	ftp://ftp.ncbi.nlm.nih.gov/genomes/all/GCF/000/014/885/GCF_000014885.1_ASM1488v1		assembly from type material
GCF_000014925.1	PRJNA224116	SAMN02604022		representative genome	290340	43663	Paenarthrobacter aurescens TC1	strain=TC1		latest	Complete Genome	Major	Full	2006-12-26	ASM1492v1	TIGR	GCA_000014925.1	identical	ftp://ftp.ncbi.nlm.nih.gov/genomes/all/GCF/000/014/925/GCF_000014925.1_ASM1492v1
GCF_000014965.1	PRJNA224116	SAMN02598285		representative genome	335543	119484	Syntrophobacter fumaroxidans MPOB	strain=MPOB		latest	Complete Genome	Major	Full	2006-10-26	ASM1496v1	US DOE Joint Genome Institute	GCA_000014965.1	identical	ftp://ftp.ncbi.nlm.nih.gov/genomes/all/GCF/000/014/965/GCF_000014965.1_ASM1496v1		assembly from type material
GCF_000015025.1	PRJNA224116	SAMN02598358		representative genome	351607	28049	Acidothermus cellulolyticus 11B	strain=11B; ATCC 43068		latest	Complete Genome	Major	Full	2006-11-09	ASM1502v1	DOE Joint Genome Institute	GCA_000015025.1	identical	ftp://ftp.ncbi.nlm.nih.gov/genomes/all/GCF/000/015/025/GCF_000015025.1_ASM1502v1		assembly from type material
GCF_000015045.1	PRJNA224116	SAMN02598297		representative genome	338966	29543	Pelobacter propionicus DSM 2379	strain=DSM 2379		latest	Complete Genome	Major	Full	2006-11-30	ASM1504v1	US DOE Joint Genome Institute	GCA_000015045.1	identical	ftp://ftp.ncbi.nlm.nih.gov/genomes/all/GCF/000/015/045/GCF_000015045.1_ASM1504v1		assembly from type material
GCF_000015125.1	PRJNA224116	SAMN02598273		representative genome	290317	1096	Chlorobium phaeobacteroides DSM 266	strain=DSM 266		latest	Complete Genome	Major	Full	2006-12-11	ASM1512v1	US DOE Joint Genome Institute	GCA_000015125.1	identical	ftp://ftp.ncbi.nlm.nih.gov/genomes/all/GCF/000/015/125/GCF_000015125.1_ASM1512v1		assembly from type material
GCF_000015145.1	PRJNA224116	SAMN02604082		representative genome	415426	54248	Hyperthermus butylicus DSM 5456	strain=DSM 5456		latest	Complete Genome	Major	Full	2007-01-22	ASM1514v1	Univ. Copenhagen	GCA_000015145.1	identical	ftp://ftp.ncbi.nlm.nih.gov/genomes/all/GCF/000/015/145/GCF_000015145.1_ASM1514v1		assembly from type material
GCF_000015245.1	PRJNA224116	SAMN02598298		representative genome	326297	60478	Shewanella amazonensis SB2B	strain=SB2B		latest	Complete Genome	Major	Full	2006-12-21	ASM1524v1	DOE Joint Genome Institute	GCA_000015245.1	identical	ftp://ftp.ncbi.nlm.nih.gov/genomes/all/GCF/000/015/245/GCF_000015245.1_ASM1524v1		assembly from type material
GCF_000015285.1	PRJNA224116	SAMN02598361		representative genome	357804	357794	Psychromonas ingrahamii 37	strain=37		latest	Complete Genome	Major	Full	2006-12-22	ASM1528v1	DOE Joint Genome Institute	GCA_000015285.1	identical	ftp://ftp.ncbi.nlm.nih.gov/genomes/all/GCF/000/015/285/GCF_000015285.1_ASM1528v1		assembly from type material
GCF_000015305.1	PRJNA224116	SAMN02598347		representative genome	350058	110539	Mycolicibacterium vanbaalenii PYR-1	strain=PYR-1		latest	Complete Genome	Major	Full	2006-12-27	ASM1530v1	DOE Joint Genome Institute	GCA_000015305.1	identical	ftp://ftp.ncbi.nlm.nih.gov/genomes/all/GCF/000/015/305/GCF_000015305.1_ASM1530v1		assembly from type material
GCF_000015345.1	PRJNA224116	SAMN02603972		representative genome	246195	870	Dichelobacter nodosus VCS1703A	strain=VCS1703A		latest	Complete Genome	Major	Full	2007-05-04	ASM1534v1	TIGR	GCA_000015345.1	identical	ftp://ftp.ncbi.nlm.nih.gov/genomes/all/GCF/000/015/345/GCF_000015345.1_ASM1534v1
GCF_000015445.1	PRJNA224116	SAMN02604047		representative genome	360095	774	Bartonella bacilliformis KC583	strain=KC583; ATCC 35685		latest	Complete Genome	Major	Full	2007-01-04	ASM1544v1	TIGR	GCA_000015445.1	identical	ftp://ftp.ncbi.nlm.nih.gov/genomes/all/GCF/000/015/445/GCF_000015445.1_ASM1544v1		assembly from type material
GCF_000015505.1	PRJNA224116	SAMN02598302		representative genome	365044	216465	Polaromonas naphthalenivorans CJ2	strain=CJ2		latest	Complete Genome	Major	Full	2007-01-04	ASM1550v1	DOE Joint Genome Institute	GCA_000015505.1	identical	ftp://ftp.ncbi.nlm.nih.gov/genomes/all/GCF/000/015/505/GCF_000015505.1_ASM1550v1		assembly from type material
GCF_000015565.1	PRJNA224116	SAMN02598379		representative genome	391735	364317	Verminephrobacter eiseniae EF01-2	strain=EF01-2		latest	Complete Genome	Major	Full	2007-01-09	ASM1556v1	DOE Joint Genome Institute	GCA_000015565.1	identical	ftp://ftp.ncbi.nlm.nih.gov/genomes/all/GCF/000/015/565/GCF_000015565.1_ASM1556v1		assembly from type material
GCF_000015585.1	PRJNA224116	SAMN00623046		representative genome	349124	1053	Halorhodospira halophila SL1	strain=SL1		latest	Complete Genome	Major	Full	2007-01-10	ASM1558v1	DOE Joint Genome Institute	GCA_000015585.1	identical	ftp://ftp.ncbi.nlm.nih.gov/genomes/all/GCF/000/015/585/GCF_000015585.1_ASM1558v1		assembly from type material
GCF_000015645.1	PRJNA224116	SAMN02603921		representative genome	146891	1219	Prochlorococcus marinus str. AS9601	strain=AS9601		latest	Complete Genome	Major	Full	2007-01-19	ASM1564v1	The Gordon and Betty Moore Foundation Marine Microbiology Initiative	GCA_000015645.1	identical	ftp://ftp.ncbi.nlm.nih.gov/genomes/all/GCF/000/015/645/GCF_000015645.1_ASM1564v1
GCF_000015665.1	PRJNA224116	SAMN02603924		representative genome	167542	1219	Prochlorococcus marinus str. MIT 9515	strain=MIT 9515		latest	Complete Genome	Major	Full	2007-01-19	ASM1566v1	The Gordon and Betty Moore Foundation Marine Microbiology Initiative	GCA_000015665.1	identical	ftp://ftp.ncbi.nlm.nih.gov/genomes/all/GCF/000/015/665/GCF_000015665.1_ASM1566v1
GCF_000015725.1	PRJNA224116	SAMN02598264		representative genome	420662	105560	Methylibium petroleiphilum PM1	strain=PM1		latest	Complete Genome	Major	Full	2007-01-29	ASM1572v1	DOE Joint Genome Institute	GCA_000015725.1	identical	ftp://ftp.ncbi.nlm.nih.gov/genomes/all/GCF/000/015/725/GCF_000015725.1_ASM1572v1		assembly from type material
GCF_000015745.1	PRJNA224116	SAMN02603899		representative genome	420246	33940	Geobacillus thermodenitrificans NG80-2	strain=NG80-2		latest	Complete Genome	Major	Full	2007-03-29	ASM1574v1	TEDA School of Biological Sciences and Biotechnology, Nankai University	GCA_000015745.1	identical	ftp://ftp.ncbi.nlm.nih.gov/genomes/all/GCF/000/015/745/GCF_000015745.1_ASM1574v1
GCF_000015765.1	PRJNA224116	SAMN00623052		representative genome	410358	83984	Methanocorpusculum labreanum Z	strain=Z		latest	Complete Genome	Major	Full	2007-02-01	ASM1576v1	DOE Joint Genome Institute	GCA_000015765.1	identical	ftp://ftp.ncbi.nlm.nih.gov/genomes/all/GCF/000/015/765/GCF_000015765.1_ASM1576v1		assembly from type material
GCF_000015825.1	PRJNA224116	SAMN02598365		representative genome	368407	2198	Methanoculleus marisnigri JR1	strain=JR1		latest	Complete Genome	Major	Full	2007-02-16	ASM1582v1	DOE Joint Genome Institute	GCA_000015825.1	identical	ftp://ftp.ncbi.nlm.nih.gov/genomes/all/GCF/000/015/825/GCF_000015825.1_ASM1582v1		assembly from type material
GCF_000015865.1	PRJNA224116	SAMN02598481		representative genome	203119	1515	Hungateiclostridium thermocellum ATCC 27405	strain=ATCC 27405		latest	Complete Genome	Major	Full	2007-02-14	ASM1586v1		GCA_000015865.1	identical	ftp://ftp.ncbi.nlm.nih.gov/genomes/all/GCF/000/015/865/GCF_000015865.1_ASM1586v1		assembly from type material
GCF_000016065.1	PRJNA224116	SAMN00623064		representative genome	323850	359303	Shewanella loihica PV-4	strain=PV-4		latest	Complete Genome	Major	Full	2007-03-07	ASM1606v1	US DOE Joint Genome Institute	GCA_000016065.1	identical	ftp://ftp.ncbi.nlm.nih.gov/genomes/all/GCF/000/016/065/GCF_000016065.1_ASM1606v1		assembly from type material
GCF_000016085.1	PRJNA224116	SAMN02598271		representative genome	290318	1094	Chlorobium phaeovibrioides DSM 265	strain=DSM 265		latest	Complete Genome	Major	Full	2007-04-12	ASM1608v1	US DOE Joint Genome Institute	GCA_000016085.1	identical	ftp://ftp.ncbi.nlm.nih.gov/genomes/all/GCF/000/016/085/GCF_000016085.1_ASM1608v1
GCF_000016165.1	PRJNA224116	SAMN02598304		representative genome	349161	59610	Desulfotomaculum reducens MI-1	strain=MI-1		latest	Complete Genome	Major	Full	2007-03-24	ASM1616v1	US DOE Joint Genome Institute	GCA_000016165.1	identical	ftp://ftp.ncbi.nlm.nih.gov/genomes/all/GCF/000/016/165/GCF_000016165.1_ASM1616v1		assembly from type material
GCF_000016185.1	PRJNA224116	SAMN02603908		representative genome	414684	34018	Rhodospirillum centenum SW	strain=SW; ATCC 51521		latest	Complete Genome	Major	Full	2010-02-17	ASM1618v1	TGen	GCA_000016185.1	identical	ftp://ftp.ncbi.nlm.nih.gov/genomes/all/GCF/000/016/185/GCF_000016185.1_ASM1618v1
GCF_000016285.1	PRJNA224116	SAMN02602976		representative genome	311402	373	Agrobacterium vitis S4	strain=S4	Kecskemet-Hungary; ATCC BAA-846	latest	Complete Genome	Major	Full	2009-01-27	ASM1628v1	Agrobacterium consortium	GCA_000016285.1	identical	ftp://ftp.ncbi.nlm.nih.gov/genomes/all/GCF/000/016/285/GCF_000016285.1_ASM1628v1
GCF_000016345.1	PRJNA224116	SAMN02598371		representative genome	312153	576611	Polynucleobacter asymbioticus QLW-P1DMWA-1	strain=QLW-P1DMWA-1		latest	Complete Genome	Major	Full	2007-04-12	ASM1634v1	DOE Joint Genome Institute	GCA_000016345.1	identical	ftp://ftp.ncbi.nlm.nih.gov/genomes/all/GCF/000/016/345/GCF_000016345.1_ASM1634v1		assembly from type material
GCF_000016405.1	PRJNA224116	SAMN02598341		representative genome	349102	1063	Rhodobacter sphaeroides ATCC 17025	strain=ATCC 17025		latest	Complete Genome	Major	Full	2007-04-20	ASM1640v1	US DOE Joint Genome Institute	GCA_000016405.1	identical	ftp://ftp.ncbi.nlm.nih.gov/genomes/all/GCF/000/016/405/GCF_000016405.1_ASM1640v1
GCF_000016425.1	PRJNA224116	SAMN02598367		representative genome	369723	168695	Salinispora tropica CNB-440	strain=CNB-440		latest	Complete Genome	Major	Full	2007-04-17	ASM1642v1	US DOE Joint Genome Institute	GCA_000016425.1	identical	ftp://ftp.ncbi.nlm.nih.gov/genomes/all/GCF/000/016/425/GCF_000016425.1_ASM1642v1		assembly from type material
GCF_000016505.1	PRJNA224116	SAMN02603294		representative genome	431943	1534	Clostridium kluyveri DSM 555	strain=DSM 555		latest	Complete Genome	Major	Full	2007-07-19	ASM1650v1	Gottingen Genomics Laboratory G2L	GCA_000016505.1	identical	ftp://ftp.ncbi.nlm.nih.gov/genomes/all/GCF/000/016/505/GCF_000016505.1_ASM1650v1		assembly from type material
GCF_000016525.1	PRJNA224116	SAMN02604313		representative genome	420247	2173	Methanobrevibacter smithii ATCC 35061	strain=ATCC 35061; PS; DSMZ 861		latest	Complete Genome	Major	Full	2007-06-04	ASM1652v1	Washington University Center for Genome Sciences	GCA_000016525.1	identical	ftp://ftp.ncbi.nlm.nih.gov/genomes/all/GCF/000/016/525/GCF_000016525.1_ASM1652v1		assembly from type material
GCF_000016545.1	PRJNA224116	SAMN00623033		representative genome	351627	44001	Caldicellulosiruptor saccharolyticus DSM 8903	strain=DSM 8903		latest	Complete Genome	Major	Full	2007-04-19	ASM1654v1	US DOE Joint Genome Institute	GCA_000016545.1	identical	ftp://ftp.ncbi.nlm.nih.gov/genomes/all/GCF/000/016/545/GCF_000016545.1_ASM1654v1		assembly from type material
GCF_000016565.1	PRJNA224116	SAMN02598392		representative genome	399739	300	Pseudomonas mendocina ymp	strain=ymp		latest	Complete Genome	Major	Full	2007-04-20	ASM1656v1	US DOE Joint Genome Institute	GCA_000016565.1	identical	ftp://ftp.ncbi.nlm.nih.gov/genomes/all/GCF/000/016/565/GCF_000016565.1_ASM1656v1
GCF_000016605.1	PRJNA224116	SAMN02598389		representative genome	399549	43687	Metallosphaera sedula DSM 5348	strain=DSM 5348		latest	Complete Genome	Major	Full	2007-04-25	ASM1660v1	US DOE Joint Genome Institute	GCA_000016605.1	identical	ftp://ftp.ncbi.nlm.nih.gov/genomes/all/GCF/000/016/605/GCF_000016605.1_ASM1660v1		assembly from type material
GCF_000016645.1	PRJNA224116	SAMN02598357		representative genome	376686	986	Flavobacterium johnsoniae UW101	strain=UW101; ATCC 17061		latest	Complete Genome	Major	Full	2007-05-01	ASM1664v1	US DOE Joint Genome Institute	GCA_000016645.1	identical	ftp://ftp.ncbi.nlm.nih.gov/genomes/all/GCF/000/016/645/GCF_000016645.1_ASM1664v1		assembly from type material
GCF_000016745.1	PRJNA224116	SAMN02598352		representative genome	351605	351604	Geobacter uraniireducens Rf4	strain=Rf4		latest	Complete Genome	Major	Full	2007-05-11	ASM1674v1	US DOE Joint Genome Institute	GCA_000016745.1	identical	ftp://ftp.ncbi.nlm.nih.gov/genomes/all/GCF/000/016/745/GCF_000016745.1_ASM1674v1		assembly from type material
GCF_000016765.1	PRJNA224116	SAMN02598383		representative genome	392499	160791	Sphingomonas wittichii RW1	strain=RW1		latest	Complete Genome	Major	Full	2007-05-31	ASM1676v1	US DOE Joint Genome Institute	GCA_000016765.1	identical	ftp://ftp.ncbi.nlm.nih.gov/genomes/all/GCF/000/016/765/GCF_000016765.1_ASM1676v1		assembly from type material
GCF_000016825.1	PRJNA224116	SAMN02598351		representative genome	557436	1598	Lactobacillus reuteri DSM 20016	strain=DSM 20016		latest	Complete Genome	Major	Full	2007-06-01	ASM1682v1	US DOE Joint Genome Institute	GCA_000016825.1	identical	ftp://ftp.ncbi.nlm.nih.gov/genomes/all/GCF/000/016/825/GCF_000016825.1_ASM1682v1		assembly from type material
GCF_000016905.1	PRJNA224116	SAMN00623068		representative genome	391009	46541	Thermosipho melanesiensis BI429	strain=BI429		latest	Complete Genome	Major	Full	2007-06-26	ASM1690v1	US DOE Joint Genome Institute (JGI-PGF)	GCA_000016905.1	identical	ftp://ftp.ncbi.nlm.nih.gov/genomes/all/GCF/000/016/905/GCF_000016905.1_ASM1690v1		assembly from type material
GCF_000016985.1	PRJNA224116	SAMN02598282		representative genome	293826	208226	Alkaliphilus metalliredigens QYMF	strain=QYMF		latest	Complete Genome	Major	Full	2007-06-28	ASM1698v1	US DOE Joint Genome Institute	GCA_000016985.1	identical	ftp://ftp.ncbi.nlm.nih.gov/genomes/all/GCF/000/016/985/GCF_000016985.1_ASM1698v1		assembly from type material
GCF_000017005.1	PRJNA224116	SAMN02603977		representative genome	467705	1302	Streptococcus gordonii str. Challis substr. CH1	strain=Challis substr. CH1		latest	Complete Genome	Major	Full	2007-09-11	ASM1700v1	TIGR	GCA_000017005.1	identical	ftp://ftp.ncbi.nlm.nih.gov/genomes/all/GCF/000/017/005/GCF_000017005.1_ASM1700v1
GCF_000017165.1	PRJNA224116	SAMN02598403		representative genome	406327	2187	Methanococcus vannielii SB	strain=SB		latest	Complete Genome	Major	Full	2007-06-29	ASM1716v1	US DOE Joint Genome Institute (JGI-PGF)	GCA_000017165.1	identical	ftp://ftp.ncbi.nlm.nih.gov/genomes/all/GCF/000/017/165/GCF_000017165.1_ASM1716v1		assembly from type material
GCF_000017185.1	PRJNA224116	SAMN00623051		representative genome	419665	42879	Methanococcus aeolicus Nankai-3	strain=Nankai-3		latest	Complete Genome	Major	Full	2007-06-29	ASM1718v1	US DOE Joint Genome Institute (JGI-PGF)	GCA_000017185.1	identical	ftp://ftp.ncbi.nlm.nih.gov/genomes/all/GCF/000/017/185/GCF_000017185.1_ASM1718v1		assembly from type material
GCF_000017225.1	PRJNA224116	SAMN00000031		representative genome	426368	39152	Methanococcus maripaludis C7	strain=C7		latest	Complete Genome	Major	Full	2007-06-29	ASM1722v1	US DOE Joint Genome Institute (JGI-PGF)	GCA_000017225.1	identical	ftp://ftp.ncbi.nlm.nih.gov/genomes/all/GCF/000/017/225/GCF_000017225.1_ASM1722v1
GCF_000017245.1	PRJNA224116	SAMN02598296		representative genome	339671	67854	Actinobacillus succinogenes 130Z	strain=130Z		latest	Complete Genome	Major	Full	2007-07-05	ASM1724v1	US DOE Joint Genome Institute	GCA_000017245.1	identical	ftp://ftp.ncbi.nlm.nih.gov/genomes/all/GCF/000/017/245/GCF_000017245.1_ASM1724v1		assembly from type material
GCF_000017265.1	PRJNA224116	SAMN02603048		representative genome	450851	284016	Phenylobacterium zucineum HLK1	strain=HLK1		latest	Complete Genome	Major	Full	2008-08-18	ASM1726v1	Cancer Institute, The Second Affiliated Hospital, Zhejiang University Medical School	GCA_000017265.1	identical	ftp://ftp.ncbi.nlm.nih.gov/genomes/all/GCF/000/017/265/GCF_000017265.1_ASM1726v1		assembly from type material
GCF_000017305.1	PRJNA224116	SAMN02598259		representative genome	266940	131568	Kineococcus radiotolerans SRS30216 = ATCC BAA-149	strain=SRS30216		latest	Complete Genome	Major	Full	2008-08-14	ASM1730v1	US DOE Joint Genome Institute	GCA_000017305.1	identical	ftp://ftp.ncbi.nlm.nih.gov/genomes/all/GCF/000/017/305/GCF_000017305.1_ASM1730v1		assembly from type material
GCF_000017405.1	PRJNA224116	SAMN02598421		representative genome	439375	529	Ochrobactrum anthropi ATCC 49188	strain=ATCC 49188		latest	Complete Genome	Major	Full	2007-07-12	ASM1740v1	US DOE Joint Genome Institute	GCA_000017405.1	identical	ftp://ftp.ncbi.nlm.nih.gov/genomes/all/GCF/000/017/405/GCF_000017405.1_ASM1740v1		assembly from type material
GCF_000017425.1	PRJNA224116	SAMN02598310		representative genome	315749	580165	Bacillus cytotoxicus NVH 391-98	strain=NVH 391-98		latest	Complete Genome	Major	Full	2007-07-17	ASM1742v1	US DOE Joint Genome Institute	GCA_000017425.1	identical	ftp://ftp.ncbi.nlm.nih.gov/genomes/all/GCF/000/017/425/GCF_000017425.1_ASM1742v1		assembly from type material
GCF_000017465.2	PRJNA224116	SAMN02604055		representative genome	360105	200	Campylobacter curvus 525.92	strain=525.92		latest	Complete Genome	Major	Full	2016-09-09	ASM1746v2	TIGR	GCA_000017465.2	identical	ftp://ftp.ncbi.nlm.nih.gov/genomes/all/GCF/000/017/465/GCF_000017465.2_ASM1746v2
GCF_000017545.1	PRJNA224116	SAMN00623043		representative genome	381764	2424	Fervidobacterium nodosum Rt17-B1	strain=Rt17-B1		latest	Complete Genome	Major	Full	2007-07-30	ASM1754v1	US DOE Joint Genome Institute	GCA_000017545.1	identical	ftp://ftp.ncbi.nlm.nih.gov/genomes/all/GCF/000/017/545/GCF_000017545.1_ASM1754v1		assembly from type material
GCF_000017565.1	PRJNA224116	SAMN00623055		representative genome	402881	256618	Parvibaculum lavamentivorans DS-1	strain=DS-1		latest	Complete Genome	Major	Full	2007-07-30	ASM1756v1	US DOE Joint Genome Institute (JGI-PGF)	GCA_000017565.1	identical	ftp://ftp.ncbi.nlm.nih.gov/genomes/all/GCF/000/017/565/GCF_000017565.1_ASM1756v1		assembly from type material
GCF_000017585.1	PRJNA224116	SAMN02603439		representative genome	360107	76517	Campylobacter hominis ATCC BAA-381	strain=ATCC BAA-381		latest	Complete Genome	Major	Full	2007-07-25	ASM1758v1	J. Craig Venter Institute	GCA_000017585.1	identical	ftp://ftp.ncbi.nlm.nih.gov/genomes/all/GCF/000/017/585/GCF_000017585.1_ASM1758v1		assembly from type material
GCF_000017625.1	PRJNA224116	SAMN02598409		representative genome	456442	358766	Methanoregula boonei 6A8	strain=6A8		latest	Complete Genome	Major	Full	2007-07-26	ASM1762v1	US DOE Joint Genome Institute	GCA_000017625.1	identical	ftp://ftp.ncbi.nlm.nih.gov/genomes/all/GCF/000/017/625/GCF_000017625.1_ASM1762v1		assembly from type material
GCF_000017645.1	PRJNA224116	SAMN02598342		representative genome	78245	280	Xanthobacter autotrophicus Py2	strain=Py2		latest	Complete Genome	Major	Full	2007-07-30	ASM1764v1	US DOE Joint Genome Institute	GCA_000017645.1	identical	ftp://ftp.ncbi.nlm.nih.gov/genomes/all/GCF/000/017/645/GCF_000017645.1_ASM1764v1		assembly from type material
GCF_000017685.1	PRJNA224116	SAMN02603347		representative genome	456481	172	Leptospira biflexa serovar Patoc strain 'Patoc 1 (Paris)'	strain=Patoc 1 (Paris)		latest	Complete Genome	Major	Full	2008-02-13	ASM1768v1	Institut Pasteur	GCA_000017685.1	identical	ftp://ftp.ncbi.nlm.nih.gov/genomes/all/GCF/000/017/685/GCF_000017685.1_ASM1768v1		assembly from type material
GCF_000017705.1	PRJNA224116	SAMN02603960		representative genome	338187	680	Vibrio campbellii ATCC BAA-1116	strain=ATCC BAA-1116; BB120		latest	Complete Genome	Major	Full	2007-08-28	ASM1770v1	The Vibrio harveyi Genome Sequencing Project	GCA_000017705.1	identical	ftp://ftp.ncbi.nlm.nih.gov/genomes/all/GCF/000/017/705/GCF_000017705.1_ASM1770v1
GCF_000017805.1	PRJNA224116	SAMN02598306		representative genome	383372	120962	Roseiflexus castenholzii DSM 13941	strain=DSM 13941		latest	Complete Genome	Major	Full	2007-08-23	ASM1780v1	US DOE Joint Genome Institute	GCA_000017805.1	identical	ftp://ftp.ncbi.nlm.nih.gov/genomes/all/GCF/000/017/805/GCF_000017805.1_ASM1780v1		assembly from type material
GCF_000017865.1	PRJNA224116	SAMN02598331		representative genome	416591	177758	Pseudothermotoga lettingae TMO	strain=TMO		latest	Complete Genome	Major	Full	2007-09-18	ASM1786v1	US DOE Joint Genome Institute	GCA_000017865.1	identical	ftp://ftp.ncbi.nlm.nih.gov/genomes/all/GCF/000/017/865/GCF_000017865.1_ASM1786v1		assembly from type material
GCF_000017945.1	PRJNA224116	SAMN02598324		representative genome	453591	160233	Ignicoccus hospitalis KIN4/I	strain=KIN4/I		latest	Complete Genome	Major	Full	2007-08-29	ASM1794v1	US DOE Joint Genome Institute	GCA_000017945.1	identical	ftp://ftp.ncbi.nlm.nih.gov/genomes/all/GCF/000/017/945/GCF_000017945.1_ASM1794v1		assembly from type material
GCF_000018025.1	PRJNA224116	SAMN02598412		representative genome	425104	271097	Shewanella sediminis HAW-EB3	strain=HAW-EB3		latest	Complete Genome	Major	Full	2007-09-18	ASM1802v1	US DOE Joint Genome Institute (JGI-PGF)	GCA_000018025.1	identical	ftp://ftp.ncbi.nlm.nih.gov/genomes/all/GCF/000/018/025/GCF_000018025.1_ASM1802v1		assembly from type material
GCF_000018105.1	PRJNA224116	SAMN02604308		representative genome	329726	155978	Acaryochloris marina MBIC11017	strain=MBIC11017		latest	Complete Genome	Major	Full	2007-10-16	ASM1810v1	Washington University	GCA_000018105.1	identical	ftp://ftp.ncbi.nlm.nih.gov/genomes/all/GCF/000/018/105/GCF_000018105.1_ASM1810v1		assembly from type material
GCF_000018145.1	PRJNA224116	SAMN02598387		representative genome	398580	215813	Dinoroseobacter shibae DFL 12 = DSM 16493	strain=DFL 12		latest	Complete Genome	Major	Full	2007-10-05	ASM1814v1	US DOE Joint Genome Institute	GCA_000018145.1	identical	ftp://ftp.ncbi.nlm.nih.gov/genomes/all/GCF/000/018/145/GCF_000018145.1_ASM1814v1		assembly from type material
GCF_000018205.1	PRJNA224116	SAMN02604084		representative genome	293614	786	Rickettsia akari str. Hartford	strain=Hartford		latest	Complete Genome	Major	Full	2007-10-02	ASM1820v1	Univ. Iowa	GCA_000018205.1	identical	ftp://ftp.ncbi.nlm.nih.gov/genomes/all/GCF/000/018/205/GCF_000018205.1_ASM1820v1
GCF_000018265.1	PRJNA224116	SAMN02598378		representative genome	391037	168697	Salinispora arenicola CNS-205	strain=CNS-205		latest	Complete Genome	Major	Full	2007-10-05	ASM1826v1	US DOE Joint Genome Institute	GCA_000018265.1	identical	ftp://ftp.ncbi.nlm.nih.gov/genomes/all/GCF/000/018/265/GCF_000018265.1_ASM1826v1
GCF_000018285.1	PRJNA224116	SAMN02598386		representative genome	398579	70864	Shewanella pealeana ATCC 700345	strain=ATCC 700345		latest	Complete Genome	Major	Full	2007-10-04	ASM1828v1	US DOE Joint Genome Institute	GCA_000018285.1	identical	ftp://ftp.ncbi.nlm.nih.gov/genomes/all/GCF/000/018/285/GCF_000018285.1_ASM1828v1		assembly from type material
GCF_000018305.1	PRJNA224116	SAMN00623034		representative genome	397948	76887	Caldivirga maquilingensis IC-167	strain=IC-167		latest	Complete Genome	Major	Full	2007-10-05	ASM1830v1	US DOE Joint Genome Institute (JGI-PGF)	GCA_000018305.1	identical	ftp://ftp.ncbi.nlm.nih.gov/genomes/all/GCF/000/018/305/GCF_000018305.1_ASM1830v1		assembly from type material
GCF_000018325.1	PRJNA224116	SAMN00623039		representative genome	350688	461876	Alkaliphilus oremlandii OhILAs	strain=OhILAs		latest	Complete Genome	Major	Full	2007-10-11	ASM1832v1	US DOE Joint Genome Institute	GCA_000018325.1	identical	ftp://ftp.ncbi.nlm.nih.gov/genomes/all/GCF/000/018/325/GCF_000018325.1_ASM1832v1		assembly from type material
GCF_000018365.1	PRJNA224116	SAMN02603476		representative genome	523850	342948	Thermococcus onnurineus NA1	strain=NA1		latest	Complete Genome	Major	Full	2008-11-06	ASM1836v1	Korea Ocean Research & Development Institute	GCA_000018365.1	identical	ftp://ftp.ncbi.nlm.nih.gov/genomes/all/GCF/000/018/365/GCF_000018365.1_ASM1836v1		assembly from type material
GCF_000018405.1	PRJNA224116	SAMN00623035		representative genome	96561	181663	Desulfococcus oleovorans Hxd3	strain=Hxd3		latest	Complete Genome	Major	Full	2007-10-19	ASM1840v1	US DOE Joint Genome Institute (JGI-PGF)	GCA_000018405.1	identical	ftp://ftp.ncbi.nlm.nih.gov/genomes/all/GCF/000/018/405/GCF_000018405.1_ASM1840v1
GCF_000018605.1	PRJNA224116	SAMN00623056		representative genome	403833	69499	Petrotoga mobilis SJ95	strain=SJ95		latest	Complete Genome	Major	Full	2007-11-16	ASM1860v1	US DOE Joint Genome Institute (JGI-PGF)	GCA_000018605.1	identical	ftp://ftp.ncbi.nlm.nih.gov/genomes/all/GCF/000/018/605/GCF_000018605.1_ASM1860v1		assembly from type material
GCF_000018665.1	PRJNA224116	SAMN00623041		representative genome	398578	80866	Delftia acidovorans SPH-1	strain=SPH-1		latest	Complete Genome	Major	Full	2007-11-16	ASM1866v1	US DOE Joint Genome Institute	GCA_000018665.1	identical	ftp://ftp.ncbi.nlm.nih.gov/genomes/all/GCF/000/018/665/GCF_000018665.1_ASM1866v1
GCF_000018685.1	PRJNA224116	SAMN02598360		representative genome	357809	66219	Lachnoclostridium phytofermentans ISDg	strain=ISDg		latest	Complete Genome	Major	Full	2007-11-19	ASM1868v1	US DOE Joint Genome Institute	GCA_000018685.1	identical	ftp://ftp.ncbi.nlm.nih.gov/genomes/all/GCF/000/018/685/GCF_000018685.1_ASM1868v1		assembly from type material
GCF_000018785.1	PRJNA224116	SAMN02603756		representative genome	441768	2148	Acholeplasma laidlawii PG-8A	strain=PG-8A		latest	Complete Genome	Major	Full	2007-12-07	ASM1878v1	Research Institute for Physico-Chemical Medicine	GCA_000018785.1	identical	ftp://ftp.ncbi.nlm.nih.gov/genomes/all/GCF/000/018/785/GCF_000018785.1_ASM1878v1		assembly from type material
GCF_000018885.1	PRJNA224116	SAMN02603684		representative genome	288705	1646	Renibacterium salmoninarum ATCC 33209	strain=ATCC 33209		latest	Complete Genome	Major	Full	2007-12-18	ASM1888v1	Northwest Fisheries Science Center, NOAA Fisheries Service	GCA_000018885.1	identical	ftp://ftp.ncbi.nlm.nih.gov/genomes/all/GCF/000/018/885/GCF_000018885.1_ASM1888v1		assembly from type material
GCF_000018945.1	PRJNA224116	SAMN02603251		representative genome	309803	2337	Thermotoga neapolitana DSM 4359	strain=DSM 4359		latest	Complete Genome	Major	Full	2009-01-27	ASM1894v1	Genotech Corp.	GCA_000018945.1	identical	ftp://ftp.ncbi.nlm.nih.gov/genomes/all/GCF/000/018/945/GCF_000018945.1_ASM1894v1		assembly from type material
GCF_000019165.1	PRJNA224116	SAMN02602985		representative genome	498761	35701	Heliobacterium modesticaldum Ice1	strain=Ice1; ATCC 51547		latest	Complete Genome	Major	Full	2008-04-01	ASM1916v1	Arizona State University	GCA_000019165.1	identical	ftp://ftp.ncbi.nlm.nih.gov/genomes/all/GCF/000/019/165/GCF_000019165.1_ASM1916v1		assembly from type material
GCF_000019205.1	PRJNA224116	SAMN02604025		representative genome	306263	201	Campylobacter lari RM2100	strain=RM2100; ATCC BAA-1060D		latest	Complete Genome	Major	Full	2009-02-05	ASM1920v1	TIGR	GCA_000019205.1	identical	ftp://ftp.ncbi.nlm.nih.gov/genomes/all/GCF/000/019/205/GCF_000019205.1_ASM1920v1
GCF_000019225.1	PRJNA224116	SAMN02603448		representative genome	498211	155077	Cellvibrio japonicus Ueda107	strain=Ueda107		latest	Complete Genome	Major	Full	2008-06-19	ASM1922v1	J. Craig Venter Institute	GCA_000019225.1	identical	ftp://ftp.ncbi.nlm.nih.gov/genomes/all/GCF/000/019/225/GCF_000019225.1_ASM1922v1		assembly from type material
GCF_000019285.1	PRJNA224116	SAMN02598454		representative genome	484022	28110	Francisella philomiragia subsp. philomiragia ATCC 25017	strain=ATCC 25017		latest	Complete Genome	Major	Full	2008-02-11	ASM1928v1	DOE Joint Genome Institute	GCA_000019285.1	identical	ftp://ftp.ncbi.nlm.nih.gov/genomes/all/GCF/000/019/285/GCF_000019285.1_ASM1928v1
GCF_000019345.1	PRJNA224116	SAMN02604063		representative genome	505682	134821	Ureaplasma parvum serovar 3 str. ATCC 27815	strain=ATCC 27815		latest	Complete Genome	Major	Full	2008-02-26	ASM1934v1	TIGR	GCA_000019345.1	identical	ftp://ftp.ncbi.nlm.nih.gov/genomes/all/GCF/000/019/345/GCF_000019345.1_ASM1934v1		assembly from type material
GCF_000019405.1	PRJNA224116	SAMN02598524		representative genome	228400	731	Histophilus somni 2336	strain=2336		latest	Complete Genome	Major	Full	2008-02-26	ASM1940v1	US DOE Joint Genome Institute	GCA_000019405.1	identical	ftp://ftp.ncbi.nlm.nih.gov/genomes/all/GCF/000/019/405/GCF_000019405.1_ASM1940v1
GCF_000019585.2	PRJNA224116	SAMN02603061		representative genome	360094	347	Xanthomonas oryzae pv. oryzae PXO99A	strain=PXO99A		latest	Complete Genome	Major	Full	2015-06-29	ASM1958v2	Center for Bioinformatics and Computational Biology	GCA_000019585.2	identical	ftp://ftp.ncbi.nlm.nih.gov/genomes/all/GCF/000/019/585/GCF_000019585.2_ASM1958v2
GCF_000019665.1	PRJNA224116	SAMN02604183		representative genome	481448	511746	Methylacidiphilum infernorum V4	strain=V4		latest	Complete Genome	Major	Full	2008-05-30	ASM1966v1	University of Hawaii	GCA_000019665.1	identical	ftp://ftp.ncbi.nlm.nih.gov/genomes/all/GCF/000/019/665/GCF_000019665.1_ASM1966v1
GCF_000019685.1	PRJNA224116	SAMN02603585		representative genome	412419	40834	Borrelia duttonii Ly	strain=Ly		latest	Complete Genome	Major	Full	2008-09-15	ASM1968v1	Marseille-Nice Genopole	GCA_000019685.1	identical	ftp://ftp.ncbi.nlm.nih.gov/genomes/all/GCF/000/019/685/GCF_000019685.1_ASM1968v1		assembly designated as reftype
GCF_000019725.1	PRJNA224116	SAMN00000277		representative genome	426355	31998	Methylobacterium radiotolerans JCM 2831	strain=JCM 2831		latest	Complete Genome	Major	Full	2008-03-21	ASM1972v1	US DOE Joint Genome Institute	GCA_000019725.1	identical	ftp://ftp.ncbi.nlm.nih.gov/genomes/all/GCF/000/019/725/GCF_000019725.1_ASM1972v1		assembly from type material
GCF_000019745.1	PRJNA224116	SAMN02598428		representative genome	452638	576610	Polynucleobacter necessarius STIR1	strain=STIR1		latest	Complete Genome	Major	Full	2008-03-28	ASM1974v1	US DOE Joint Genome Institute (JGI-PGF)	GCA_000019745.1	identical	ftp://ftp.ncbi.nlm.nih.gov/genomes/all/GCF/000/019/745/GCF_000019745.1_ASM1974v1
GCF_000019785.1	PRJNA224116	SAMN02598429		representative genome	395495	34029	Leptothrix cholodnii SP-6	strain=SP-6		latest	Complete Genome	Major	Full	2008-03-25	ASM1978v1	US DOE Joint Genome Institute	GCA_000019785.1	identical	ftp://ftp.ncbi.nlm.nih.gov/genomes/all/GCF/000/019/785/GCF_000019785.1_ASM1978v1
GCF_000019845.1	PRJNA224116	SAMN02598441		representative genome	395963	533	Beijerinckia indica subsp. indica ATCC 9039	strain=ATCC 9039		latest	Complete Genome	Major	Full	2008-04-11	ASM1984v1	US DOE Joint Genome Institute	GCA_000019845.1	identical	ftp://ftp.ncbi.nlm.nih.gov/genomes/all/GCF/000/019/845/GCF_000019845.1_ASM1984v1		assembly from type material
GCF_000019905.1	PRJNA224116	SAMN00120225		representative genome	262543	332410	Exiguobacterium sibiricum 255-15	strain=255-15		latest	Complete Genome	Major	Full	2008-04-03	ASM1990v1	US DOE Joint Genome Institute	GCA_000019905.1	identical	ftp://ftp.ncbi.nlm.nih.gov/genomes/all/GCF/000/019/905/GCF_000019905.1_ASM1990v1		assembly from type material
GCF_000019945.1	PRJNA224116	SAMN00000038		representative genome	441620	223967	Methylorubrum populi BJ001	strain=BJ001		latest	Complete Genome	Major	Full	2008-04-09	ASM1994v1	US DOE Joint Genome Institute (JGI-PGF)	GCA_000019945.1	identical	ftp://ftp.ncbi.nlm.nih.gov/genomes/all/GCF/000/019/945/GCF_000019945.1_ASM1994v1		assembly from type material
GCF_000019965.1	PRJNA224116	SAMN00000285		representative genome	452637	107709	Opitutus terrae PB90-1	strain=PB90-1		latest	Complete Genome	Major	Full	2008-04-08	ASM1996v1	US DOE Joint Genome Institute	GCA_000019965.1	identical	ftp://ftp.ncbi.nlm.nih.gov/genomes/all/GCF/000/019/965/GCF_000019965.1_ASM1996v1		assembly from type material
GCF_000020005.1	PRJNA224116	SAMN02598430		representative genome	457570	375929	Natranaerobius thermophilus JW/NM-WN-LF	strain=JW/NM-WN-LF		latest	Complete Genome	Major	Full	2008-04-09	ASM2000v1	US DOE Joint Genome Institute (JGI-PGF)	GCA_000020005.1	identical	ftp://ftp.ncbi.nlm.nih.gov/genomes/all/GCF/000/020/005/GCF_000020005.1_ASM2000v1		assembly from type material
GCF_000020025.1	PRJNA224116	SAMN02598449		representative genome	63737	272131	Nostoc punctiforme PCC 73102	strain=ATCC 29133; PCC 73102		latest	Complete Genome	Major	Full	2008-04-24	ASM2002v1	US DOE Joint Genome Institute	GCA_000020025.1	identical	ftp://ftp.ncbi.nlm.nih.gov/genomes/all/GCF/000/020/025/GCF_000020025.1_ASM2002v1		assembly from type material
GCF_000020045.1	PRJNA224116	SAMN02598384		representative genome	391038	148447	Paraburkholderia phymatum STM815	strain=STM815		latest	Complete Genome	Major	Full	2008-04-22	ASM2004v1	US DOE Joint Genome Institute	GCA_000020045.1	identical	ftp://ftp.ncbi.nlm.nih.gov/genomes/all/GCF/000/020/045/GCF_000020045.1_ASM2004v1		assembly from type material
GCF_000020065.1	PRJNA224116	SAMN02604019		representative genome	243272	2111	Mycoplasma arthritidis 158L3-1	strain=158L3-1		latest	Complete Genome	Major	Full	2008-06-25	ASM2006v1	TIGR	GCA_000020065.1	identical	ftp://ftp.ncbi.nlm.nih.gov/genomes/all/GCF/000/020/065/GCF_000020065.1_ASM2006v1
GCF_000020145.1	PRJNA224116	SAMN00000042		representative genome	445932	423605	Elusimicrobium minutum Pei191	strain=Pei191		latest	Complete Genome	Major	Full	2008-04-30	ASM2014v1	US DOE Joint Genome Institute (JGI-PGF)	GCA_000020145.1	identical	ftp://ftp.ncbi.nlm.nih.gov/genomes/all/GCF/000/020/145/GCF_000020145.1_ASM2014v1		assembly from type material
GCF_000020165.1	PRJNA224116	SAMN02603538		representative genome	935198	1491	Clostridium botulinum B str. Eklund 17B (NRP)	strain=Eklund 17B		latest	Complete Genome	Major	Full	2008-05-07	ASM2016v1	Los Alamos National Laboratory	GCA_000020165.1	identical	ftp://ftp.ncbi.nlm.nih.gov/genomes/all/GCF/000/020/165/GCF_000020165.1_ASM2016v1
GCF_000020205.1	PRJNA224116	SAMN02598396		representative genome	402626	329	Ralstonia pickettii 12J	strain=12J		latest	Complete Genome	Major	Full	2008-05-07	ASM2020v1	US DOE Joint Genome Institute (JGI-PGF)	GCA_000020205.1	identical	ftp://ftp.ncbi.nlm.nih.gov/genomes/all/GCF/000/020/205/GCF_000020205.1_ASM2020v1
GCF_000020225.1	PRJNA224116	SAMN00138213		representative genome	349741	239935	Akkermansia muciniphila ATCC BAA-835	strain=ATCC BAA-835		latest	Complete Genome	Major	Full	2008-05-05	ASM2022v1	US DOE Joint Genome Institute (JGI-PGF)	GCA_000020225.1	identical	ftp://ftp.ncbi.nlm.nih.gov/genomes/all/GCF/000/020/225/GCF_000020225.1_ASM2022v1		assembly from type material
GCF_000020305.1	PRJNA224116	SAMN02604306		representative genome	320483	770	Anaplasma marginale str. Florida	strain=Florida		latest	Complete Genome	Major	Full	2009-02-03	ASM2030v1	Washington State University	GCA_000020305.1	identical	ftp://ftp.ncbi.nlm.nih.gov/genomes/all/GCF/000/020/305/GCF_000020305.1_ASM2030v1
GCF_000020365.1	PRJNA224116	SAMN02603282		representative genome	177437	2296	Desulfobacterium autotrophicum HRM2	strain=HRM2		latest	Complete Genome	Major	Full	2009-02-18	ASM2036v1	Goettingen Genomics Laboratory	GCA_000020365.1	identical	ftp://ftp.ncbi.nlm.nih.gov/genomes/all/GCF/000/020/365/GCF_000020365.1_ASM2036v1		assembly from type material
GCF_000020385.1	PRJNA224116	SAMN00623044		representative genome	398767	313985	Geobacter lovleyi SZ	strain=SZ		latest	Complete Genome	Major	Full	2008-06-05	ASM2038v1	US DOE Joint Genome Institute	GCA_000020385.1	identical	ftp://ftp.ncbi.nlm.nih.gov/genomes/all/GCF/000/020/385/GCF_000020385.1_ASM2038v1		assembly from type material
GCF_000020465.1	PRJNA224116	SAMN02598270		representative genome	290315	1092	Chlorobium limicola DSM 245	strain=DSM 245		latest	Complete Genome	Major	Full	2008-06-04	ASM2046v1	US DOE Joint Genome Institute	GCA_000020465.1	identical	ftp://ftp.ncbi.nlm.nih.gov/genomes/all/GCF/000/020/465/GCF_000020465.1_ASM2046v1		assembly from type material
GCF_000020485.1	PRJNA224116	SAMN00623047		representative genome	373903	31909	Halothermothrix orenii H 168	strain=H 168; DSM 9562		latest	Complete Genome	Major	Full	2009-01-13	ASM2048v1	US DOE Joint Genome Institute	GCA_000020485.1	identical	ftp://ftp.ncbi.nlm.nih.gov/genomes/all/GCF/000/020/485/GCF_000020485.1_ASM2048v1		assembly from type material
GCF_000020505.1	PRJNA224116	SAMN02598460		representative genome	517417	274539	Chlorobaculum parvum NCIB 8327	strain=NCIB 8327		latest	Complete Genome	Major	Full	2008-06-27	ASM2050v1	US DOE Joint Genome Institute	GCA_000020505.1	identical	ftp://ftp.ncbi.nlm.nih.gov/genomes/all/GCF/000/020/505/GCF_000020505.1_ASM2050v1
GCF_000020525.1	PRJNA224116	SAMN02598461		representative genome	517418	100716	Chloroherpeton thalassium ATCC 35110	strain=ATCC 35110		latest	Complete Genome	Major	Full	2008-06-27	ASM2052v1	US DOE Joint Genome Institute	GCA_000020525.1	identical	ftp://ftp.ncbi.nlm.nih.gov/genomes/all/GCF/000/020/525/GCF_000020525.1_ASM2052v1		assembly from type material
GCF_000020545.1	PRJNA224116	SAMN02598272		representative genome	331678	1096	Chlorobium phaeobacteroides BS1	strain=BS1		latest	Complete Genome	Major	Full	2008-06-09	ASM2054v1	US DOE Joint Genome Institute	GCA_000020545.1	identical	ftp://ftp.ncbi.nlm.nih.gov/genomes/all/GCF/000/020/545/GCF_000020545.1_ASM2054v1
GCF_000020605.1	PRJNA224116	SAMN02603082		representative genome	515619	39491	[Eubacterium] rectale ATCC 33656	strain=ATCC 33656		latest	Complete Genome	Major	Full	2009-06-04	ASM2060v1	Center for Genome Sciences, Washington University School of Medicine	GCA_000020605.1	identical	ftp://ftp.ncbi.nlm.nih.gov/genomes/all/GCF/000/020/605/GCF_000020605.1_ASM2060v1		assembly from type material
GCF_000020625.1	PRJNA224116	SAMN02598281		representative genome	290512	1102	Prosthecochloris aestuarii DSM 271	strain=DSM 271		latest	Complete Genome	Major	Full	2008-07-18	ASM2062v1	US DOE Joint Genome Institute	GCA_000020625.1	identical	ftp://ftp.ncbi.nlm.nih.gov/genomes/all/GCF/000/020/625/GCF_000020625.1_ASM2062v1		assembly from type material
GCF_000020645.1	PRJNA224116	SAMN02598283		representative genome	324925	34090	Pelodictyon phaeoclathratiforme BU-1	strain=BU-1		latest	Complete Genome	Major	Full	2008-07-18	ASM2064v1	US DOE Joint Genome Institute	GCA_000020645.1	identical	ftp://ftp.ncbi.nlm.nih.gov/genomes/all/GCF/000/020/645/GCF_000020645.1_ASM2064v1		assembly from type material
GCF_000020685.1	PRJNA224116	SAMN02603250		representative genome	546414	310783	Deinococcus deserti VCD115	strain=VCD115		latest	Complete Genome	Major	Full	2009-04-02	ASM2068v1	Genoscope	GCA_000020685.1	identical	ftp://ftp.ncbi.nlm.nih.gov/genomes/all/GCF/000/020/685/GCF_000020685.1_ASM2068v1		assembly from type material
GCF_000020725.1	PRJNA224116	SAMN02598400		representative genome	404380	225194	Geobacter bemidjiensis Bem	strain=Bem		latest	Complete Genome	Major	Full	2008-08-19	ASM2072v1	US DOE Joint Genome Institute (JGI-PGF)	GCA_000020725.1	identical	ftp://ftp.ncbi.nlm.nih.gov/genomes/all/GCF/000/020/725/GCF_000020725.1_ASM2072v1		assembly from type material
GCF_000020905.1	PRJNA224116	SAMN02603098		representative genome	490899	94694	Desulfurococcus amylolyticus 1221n	strain=1221n		latest	Complete Genome	Major	Full	2008-12-24	ASM2090v1	Centre 'Bioengineering' RAS	GCA_000020905.1	identical	ftp://ftp.ncbi.nlm.nih.gov/genomes/all/GCF/000/020/905/GCF_000020905.1_ASM2090v1		assembly from synonym type material
GCF_000020945.1	PRJNA224116	SAMN02603927		representative genome	309798	35786	Coprothermobacter proteolyticus DSM 5265	strain=DSM 5265		latest	Complete Genome	Major	Full	2008-09-26	ASM2094v1	The J. Craig Venter Institute	GCA_000020945.1	identical	ftp://ftp.ncbi.nlm.nih.gov/genomes/all/GCF/000/020/945/GCF_000020945.1_ASM2094v1		assembly from type material
GCF_000020965.1	PRJNA224116	SAMN02603928		representative genome	309799	14	Dictyoglomus thermophilum H-6-12	strain=H-6-12; ATCC 35947		latest	Complete Genome	Major	Full	2008-09-26	ASM2096v1	The J. Craig Venter Institute	GCA_000020965.1	identical	ftp://ftp.ncbi.nlm.nih.gov/genomes/all/GCF/000/020/965/GCF_000020965.1_ASM2096v1		assembly from type material
GCF_000021025.1	PRJNA224116	SAMN02603956		representative genome	557598	168471	Laribacter hongkongensis HLHK9	strain=HLHK9		latest	Complete Genome	Major	Full	2009-04-14	ASM2102v1	The University of Hong Kong	GCA_000021025.1	identical	ftp://ftp.ncbi.nlm.nih.gov/genomes/all/GCF/000/021/025/GCF_000021025.1_ASM2102v1
GCF_000021285.1	PRJNA224116	SAMN02603170		representative genome	484019	2421	Thermosipho africanus TCF52B	strain=TCF52B		latest	Complete Genome	Major	Full	2008-12-10	ASM2128v1	Dalhousie University	GCA_000021285.1	identical	ftp://ftp.ncbi.nlm.nih.gov/genomes/all/GCF/000/021/285/GCF_000021285.1_ASM2128v1
GCF_000021325.1	PRJNA224116	SAMN02598444		representative genome	272568	33996	Gluconacetobacter diazotrophicus PA1 5			latest	Complete Genome	Major	Full	2008-10-16	ASM2132v1	US DOE Joint Genome Institute (JGI-PGF)	GCA_000021325.1	identical	ftp://ftp.ncbi.nlm.nih.gov/genomes/all/GCF/000/021/325/GCF_000021325.1_ASM2132v1		assembly from type material
GCF_000021345.1	PRJNA224116	SAMN00000679		representative genome	395492	384	Rhizobium leguminosarum bv. trifolii WSM2304	strain=WSM2304		latest	Complete Genome	Major	Full	2008-10-16	ASM2134v1	US DOE Joint Genome Institute (JGI-PGF)	GCA_000021345.1	identical	ftp://ftp.ncbi.nlm.nih.gov/genomes/all/GCF/000/021/345/GCF_000021345.1_ASM2134v1
GCF_000021385.1	PRJNA224116	SAMN00000799		representative genome	883	881	Desulfovibrio vulgaris str. 'Miyazaki F'	strain=Miyazaki F		latest	Complete Genome	Major	Full	2008-12-24	ASM2138v1	US DOE Joint Genome Institute	GCA_000021385.1	identical	ftp://ftp.ncbi.nlm.nih.gov/genomes/all/GCF/000/021/385/GCF_000021385.1_ASM2138v1
GCF_000021485.1	PRJNA224116	SAMN02603974		representative genome	243159	920	Acidithiobacillus ferrooxidans ATCC 23270	strain=ATCC 23270		latest	Complete Genome	Major	Full	2008-12-19	ASM2148v1	TIGR	GCA_000021485.1	identical	ftp://ftp.ncbi.nlm.nih.gov/genomes/all/GCF/000/021/485/GCF_000021485.1_ASM2148v1		assembly from type material
GCF_000021545.1	PRJNA224116	SAMN02604030		representative genome	204536	309806	Sulfurihydrogenibium azorense Az-Fu1	strain=Az-Fu1		latest	Complete Genome	Major	Full	2009-03-25	ASM2154v1	TIGR	GCA_000021545.1	identical	ftp://ftp.ncbi.nlm.nih.gov/genomes/all/GCF/000/021/545/GCF_000021545.1_ASM2154v1		assembly from type material
GCF_000021565.1	PRJNA224116	SAMN02604029		representative genome	123214	309805	Persephonella marina EX-H1	strain=EX-H1		latest	Complete Genome	Major	Full	2009-03-25	ASM2156v1	TIGR	GCA_000021565.1	identical	ftp://ftp.ncbi.nlm.nih.gov/genomes/all/GCF/000/021/565/GCF_000021565.1_ASM2156v1		assembly from type material
GCF_000021685.1	PRJNA224116	SAMN02603430		representative genome	309801	500	Thermomicrobium roseum DSM 5159	strain=DSM 5159		latest	Complete Genome	Major	Full	2009-01-22	ASM2168v1	J Craig Venter Institute	GCA_000021685.1	identical	ftp://ftp.ncbi.nlm.nih.gov/genomes/all/GCF/000/021/685/GCF_000021685.1_ASM2168v1		assembly from type material
GCF_000021725.1	PRJNA224116	SAMN02603431		representative genome	598659	244787	Nautilia profundicola AmH	strain=AmH		latest	Complete Genome	Major	Full	2009-02-13	ASM2172v1	J Craig Venter Institute	GCA_000021725.1	identical	ftp://ftp.ncbi.nlm.nih.gov/genomes/all/GCF/000/021/725/GCF_000021725.1_ASM2172v1		assembly from type material
GCF_000021745.1	PRJNA224116	SAMN00000045		representative genome	395965	199596	Methylocella silvestris BL2	strain=BL2		latest	Complete Genome	Major	Full	2008-12-15	ASM2174v1	US DOE Joint Genome Institute (JGI-PGF)	GCA_000021745.1	identical	ftp://ftp.ncbi.nlm.nih.gov/genomes/all/GCF/000/021/745/GCF_000021745.1_ASM2174v1		assembly from type material
GCF_000021865.1	PRJNA224116	SAMN02604080		representative genome	272942	1061	Rhodobacter capsulatus SB 1003	strain=SB 1003		latest	Complete Genome	Major	Full	2010-04-09	ASM2186v1	Univ. Chicago	GCA_000021865.1	identical	ftp://ftp.ncbi.nlm.nih.gov/genomes/all/GCF/000/021/865/GCF_000021865.1_ASM2186v1
GCF_000021885.1	PRJNA224116	SAMN02603313		representative genome	557723	738	Glaesserella parasuis SH0165	strain=SH0165		latest	Complete Genome	Major	Full	2009-01-07	ASM2188v1	Huazhong Agricultural University	GCA_000021885.1	identical	ftp://ftp.ncbi.nlm.nih.gov/genomes/all/GCF/000/021/885/GCF_000021885.1_ASM2188v1
GCF_000021925.1	PRJNA224116	SAMN02598433		representative genome	272564	49338	Desulfitobacterium hafniense DCB-2	strain=DCB-2		latest	Complete Genome	Major	Full	2009-01-05	ASM2192v1	US DOE Joint Genome Institute	GCA_000021925.1	identical	ftp://ftp.ncbi.nlm.nih.gov/genomes/all/GCF/000/021/925/GCF_000021925.1_ASM2192v1		assembly from type material
GCF_000021945.1	PRJNA224116	SAMN00623036		representative genome	326427	152260	Chloroflexus aggregans DSM 9485	strain=DSM 9485		latest	Complete Genome	Major	Full	2009-01-05	ASM2194v1	US DOE Joint Genome Institute	GCA_000021945.1	identical	ftp://ftp.ncbi.nlm.nih.gov/genomes/all/GCF/000/021/945/GCF_000021945.1_ASM2194v1		assembly from type material
GCF_000021965.1	PRJNA224116	SAMN00001866		representative genome	521011	475088	Methanosphaerula palustris E1-9c	strain=E1-9c		latest	Complete Genome	Major	Full	2009-01-05	ASM2196v1	US DOE Joint Genome Institute (JGI-PGF)	GCA_000021965.1	identical	ftp://ftp.ncbi.nlm.nih.gov/genomes/all/GCF/000/021/965/GCF_000021965.1_ASM2196v1		assembly from type material
GCF_000021985.1	PRJNA224116	SAMN00001443		representative genome	396588	1033854	Thioalkalivibrio sulfidiphilus HL-EbGr7	strain=HL-EbGR7		latest	Complete Genome	Major	Full	2009-01-13	ASM2198v1	US DOE Joint Genome Institute (JGI-PGF)	GCA_000021985.1	identical	ftp://ftp.ncbi.nlm.nih.gov/genomes/all/GCF/000/021/985/GCF_000021985.1_ASM2198v1		assembly from type material
GCF_000022025.1	PRJNA224116	SAMN00000051		representative genome	452863	85085	Pseudarthrobacter chlorophenolicus A6	strain=A6		latest	Complete Genome	Major	Full	2009-01-09	ASM2202v1	US DOE Joint Genome Institute (JGI-PGF)	GCA_000022025.1	identical	ftp://ftp.ncbi.nlm.nih.gov/genomes/all/GCF/000/022/025/GCF_000022025.1_ASM2202v1		assembly from type material
GCF_000022065.1	PRJNA224116	SAMN00623037		representative genome	394503	1521	Ruminiclostridium cellulolyticum H10	strain=H10; ATCC 35319		latest	Complete Genome	Major	Full	2009-01-13	ASM2206v1	US DOE Joint Genome Institute	GCA_000022065.1	identical	ftp://ftp.ncbi.nlm.nih.gov/genomes/all/GCF/000/022/065/GCF_000022065.1_ASM2206v1		assembly from type material
GCF_000022085.1	PRJNA224116	SAMN00000043		representative genome	460265	114616	Methylobacterium nodulans ORS 2060	strain=ORS 2060		latest	Complete Genome	Major	Full	2009-01-12	ASM2208v1	US DOE Joint Genome Institute (JGI-PGF)	GCA_000022085.1	identical	ftp://ftp.ncbi.nlm.nih.gov/genomes/all/GCF/000/022/085/GCF_000022085.1_ASM2208v1		assembly from type material
GCF_000022125.1	PRJNA224116	SAMN00001882		representative genome	525146	876	Desulfovibrio desulfuricans ATCC 27774	strain=ATCC 27774		latest	Complete Genome	Major	Full	2009-01-09	ASM2212v1	US DOE Joint Genome Institute (JGI-PGF)	GCA_000022125.1	identical	ftp://ftp.ncbi.nlm.nih.gov/genomes/all/GCF/000/022/125/GCF_000022125.1_ASM2212v1
GCF_000022145.1	PRJNA224116	SAMN00000050		representative genome	455488	161493	Anaeromyxobacter dehalogenans 2CP-1	strain=2CP-1		latest	Complete Genome	Major	Full	2009-01-12	ASM2214v1	US DOE Joint Genome Institute (JGI-PGF)	GCA_000022145.1	identical	ftp://ftp.ncbi.nlm.nih.gov/genomes/all/GCF/000/022/145/GCF_000022145.1_ASM2214v1		assembly from type material
GCF_000022205.1	PRJNA224116	SAMN02598407		representative genome	416348	2247	Halorubrum lacusprofundi ATCC 49239	strain=ATCC 49239		latest	Complete Genome	Major	Full	2009-02-04	ASM2220v1	US DOE Joint Genome Institute (JGI-PGF)	GCA_000022205.1	identical	ftp://ftp.ncbi.nlm.nih.gov/genomes/all/GCF/000/022/205/GCF_000022205.1_ASM2220v1		assembly from type material
GCF_000022265.1	PRJNA224116	SAMN00623045		representative genome	316067	1203471	Geobacter daltonii FRC-32	strain=FRC-32		latest	Complete Genome	Major	Full	2009-01-27	ASM2226v1	US DOE Joint Genome Institute	GCA_000022265.1	identical	ftp://ftp.ncbi.nlm.nih.gov/genomes/all/GCF/000/022/265/GCF_000022265.1_ASM2226v1		assembly from type material
GCF_000022325.1	PRJNA224116	SAMN02598462		representative genome	521460	31899	Caldicellulosiruptor bescii DSM 6725	strain=DSM 6725		latest	Complete Genome	Major	Full	2009-02-04	ASM2232v1	US DOE Joint Genome Institute (JGI-PGF)	GCA_000022325.1	identical	ftp://ftp.ncbi.nlm.nih.gov/genomes/all/GCF/000/022/325/GCF_000022325.1_ASM2232v1		assembly from type material
GCF_000022385.1	PRJNA224116	SAMN02598420		representative genome	429572	43080	Sulfolobus islandicus L.S.2.15	strain=L.S.2.15		latest	Complete Genome	Major	Full	2009-04-24	ASM2238v1	US DOE Joint Genome Institute	GCA_000022385.1	identical	ftp://ftp.ncbi.nlm.nih.gov/genomes/all/GCF/000/022/385/GCF_000022385.1_ASM2238v1
GCF_000022525.1	PRJNA224116	SAMN02603947		representative genome	434131	950	Neorickettsia risticii str. Illinois	strain=Illinois		latest	Complete Genome	Major	Full	2009-07-23	ASM2252v1	The Ohio State University	GCA_000022525.1	identical	ftp://ftp.ncbi.nlm.nih.gov/genomes/all/GCF/000/022/525/GCF_000022525.1_ASM2252v1		assembly from type material
GCF_000022545.1	PRJNA224116	SAMN02603090		representative genome	604354	172049	Thermococcus sibiricus MM 739	strain=MM 739		latest	Complete Genome	Major	Full	2009-06-29	ASM2254v1	Centre	GCA_000022545.1	identical	ftp://ftp.ncbi.nlm.nih.gov/genomes/all/GCF/000/022/545/GCF_000022545.1_ASM2254v1		assembly from type material
GCF_000022565.1	PRJNA224116	SAMN02603447		representative genome	240015	33075	Acidobacterium capsulatum ATCC 51196	strain=ATCC 51196		latest	Complete Genome	Major	Full	2009-03-30	ASM2256v1	J. Craig Venter Institute	GCA_000022565.1	identical	ftp://ftp.ncbi.nlm.nih.gov/genomes/all/GCF/000/022/565/GCF_000022565.1_ASM2256v1		assembly from type material
GCF_000022725.1	PRJNA224116	SAMN02603206		representative genome	634504	33045	Bartonella grahamii as4aup	strain=as4aup		latest	Complete Genome	Major	Full	2009-06-19	ASM2272v1	Dept. of Molecular Evolution, Uppsala University	GCA_000022725.1	identical	ftp://ftp.ncbi.nlm.nih.gov/genomes/all/GCF/000/022/725/GCF_000022725.1_ASM2272v1
GCF_000022905.1	PRJNA224116	SAMN02603064		representative genome	548476	169292	Corynebacterium aurimucosum ATCC 700975			latest	Complete Genome	Major	Full	2009-04-24	ASM2290v1	Center for BioTechnology, Bielefeld University	GCA_000022905.1	identical	ftp://ftp.ncbi.nlm.nih.gov/genomes/all/GCF/000/022/905/GCF_000022905.1_ASM2290v1		assembly from synonym type material
GCF_000023025.1	PRJNA224116	SAMN02603454		representative genome	377629	2426	Teredinibacter turnerae T7901	strain=T7901		latest	Complete Genome	Major	Full	2009-06-15	ASM2302v1	J. Craig Venter Institute	GCA_000023025.1	identical	ftp://ftp.ncbi.nlm.nih.gov/genomes/all/GCF/000/023/025/GCF_000023025.1_ASM2302v1
GCF_000023065.1	PRJNA224116	SAMN02598508		representative genome	595494	43948	Tolumonas auensis DSM 9187	strain=DSM 9187		latest	Complete Genome	Major	Full	2009-05-13	ASM2306v1	US DOE Joint Genome Institute (JGI-PGF)	GCA_000023065.1	identical	ftp://ftp.ncbi.nlm.nih.gov/genomes/all/GCF/000/023/065/GCF_000023065.1_ASM2306v1		assembly from type material
GCF_000023105.1	PRJNA224116	SAMN02598436		representative genome	471853	84757	Beutenbergia cavernae DSM 12333	strain=DSM 12333		latest	Complete Genome	Major	Full	2009-05-07	ASM2310v1	US DOE Joint Genome Institute (JGI-PGF)	GCA_000023105.1	identical	ftp://ftp.ncbi.nlm.nih.gov/genomes/all/GCF/000/023/105/GCF_000023105.1_ASM2310v1		assembly from type material
GCF_000023125.1	PRJNA224116	SAMN02598437		representative genome	471854	94254	Dyadobacter fermentans DSM 18053	strain=DSM 18053		latest	Complete Genome	Major	Full	2009-07-31	ASM2312v1	US DOE Joint Genome Institute (JGI-PGF)	GCA_000023125.1	identical	ftp://ftp.ncbi.nlm.nih.gov/genomes/all/GCF/000/023/125/GCF_000023125.1_ASM2312v1		assembly from type material
GCF_000023145.1	PRJNA224116	SAMN02603033		representative genome	645127	161879	Corynebacterium kroppenstedtii DSM 44385	strain=DSM 44385		latest	Complete Genome	Major	Full	2009-05-19	ASM2314v1	Bielefeld University, Center for Biotechnology	GCA_000023145.1	identical	ftp://ftp.ncbi.nlm.nih.gov/genomes/all/GCF/000/023/145/GCF_000023145.1_ASM2314v1		assembly from type material
GCF_000023205.1	PRJNA224116	SAMN00000281		representative genome	465515	1270	Micrococcus luteus NCTC 2665	strain=NCTC 2665		latest	Complete Genome	Major	Full	2009-06-12	ASM2320v1	US DOE Joint Genome Institute (JGI-PGF)	GCA_000023205.1	identical	ftp://ftp.ncbi.nlm.nih.gov/genomes/all/GCF/000/023/205/GCF_000023205.1_ASM2320v1		assembly from type material
GCF_000023225.1	PRJNA224116	SAMN00002602		representative genome	525897	899	Desulfomicrobium baculatum DSM 4028	strain=DSM 4028		latest	Complete Genome	Major	Full	2009-08-26	ASM2322v1	US DOE Joint Genome Institute (JGI-PGF)	GCA_000023225.1	identical	ftp://ftp.ncbi.nlm.nih.gov/genomes/all/GCF/000/023/225/GCF_000023225.1_ASM2322v1		assembly from type material
GCF_000023245.1	PRJNA224116	SAMN00001904		representative genome	446462	40567	Actinosynnema mirum DSM 43827	strain=DSM 43827		latest	Complete Genome	Major	Full	2009-08-13	ASM2324v1	US DOE Joint Genome Institute (JGI-PGF)	GCA_000023245.1	identical	ftp://ftp.ncbi.nlm.nih.gov/genomes/all/GCF/000/023/245/GCF_000023245.1_ASM2324v1		assembly from type material
GCF_000023265.1	PRJNA224116	SAMN02598466		representative genome	525909	53635	Acidimicrobium ferrooxidans DSM 10331	strain=DSM 10331		latest	Complete Genome	Major	Full	2009-08-18	ASM2326v1	US DOE Joint Genome Institute (JGI-PGF)	GCA_000023265.1	identical	ftp://ftp.ncbi.nlm.nih.gov/genomes/all/GCF/000/023/265/GCF_000023265.1_ASM2326v1		assembly from type material
GCF_000023285.1	PRJNA224116	SAMN00001911		representative genome	521097	1018	Capnocytophaga ochracea DSM 7271	strain=DSM 7271		latest	Complete Genome	Major	Full	2009-08-26	ASM2328v1	US DOE Joint Genome Institute (JGI-PGF)	GCA_000023285.1	identical	ftp://ftp.ncbi.nlm.nih.gov/genomes/all/GCF/000/023/285/GCF_000023285.1_ASM2328v1		assembly from type material
GCF_000023325.1	PRJNA224116	SAMN00001868		representative genome	521045	651457	Kosmotoga olearia TBF 19.5.1	strain=TBF 19.5.1		latest	Complete Genome	Major	Full	2009-06-08	ASM2332v1	US DOE Joint Genome Institute (JGI-PGF)	GCA_000023325.1	identical	ftp://ftp.ncbi.nlm.nih.gov/genomes/all/GCF/000/023/325/GCF_000023325.1_ASM2332v1		assembly from type material
GCF_000023445.1	PRJNA224116	SAMN00001870		representative genome	526222	880	Desulfovibrio salexigens DSM 2638	strain=DSM 2638		latest	Complete Genome	Major	Full	2009-06-26	ASM2344v1	US DOE Joint Genome Institute (JGI-PGF)	GCA_000023445.1	identical	ftp://ftp.ncbi.nlm.nih.gov/genomes/all/GCF/000/023/445/GCF_000023445.1_ASM2344v1		assembly from type material
GCF_000023465.1	PRJNA224116	SAMN02603855		representative genome	655815	398743	Zunongwangia profunda SM-A87	strain=SMA-87		latest	Complete Genome	Major	Full	2010-04-21	ASM2346v1	ShanDong University	GCA_000023465.1	identical	ftp://ftp.ncbi.nlm.nih.gov/genomes/all/GCF/000/023/465/GCF_000023465.1_ASM2346v1		assembly from type material
GCF_000023605.1	PRJNA224116	SAMN02598478		representative genome	561230	554	Pectobacterium carotovorum subsp. carotovorum PC1	strain=PC1		latest	Complete Genome	Major	Full	2009-07-07	ASM2360v1	US DOE Joint Genome Institute	GCA_000023605.1	identical	ftp://ftp.ncbi.nlm.nih.gov/genomes/all/GCF/000/023/605/GCF_000023605.1_ASM2360v1
GCF_000023705.1	PRJNA224116	SAMN00017443		representative genome	583345	359408	Methylotenera mobilis JLW8	strain=JLW8		latest	Complete Genome	Major	Full	2009-07-15	ASM2370v1	US DOE Joint Genome Institute	GCA_000023705.1	identical	ftp://ftp.ncbi.nlm.nih.gov/genomes/all/GCF/000/023/705/GCF_000023705.1_ASM2370v1		assembly from type material
GCF_000023745.1	PRJNA224116	SAMN02598498		representative genome	582744	266009	Methylovorus glucosetrophus SIP3-4	strain=SIP3-4		latest	Complete Genome	Major	Full	2009-07-15	ASM2374v1	US DOE Joint Genome Institute	GCA_000023745.1	identical	ftp://ftp.ncbi.nlm.nih.gov/genomes/all/GCF/000/023/745/GCF_000023745.1_ASM2374v1
GCF_000023785.1	PRJNA224116	SAMN02598497		representative genome	582402	2724	Hirschia baltica ATCC 49814			latest	Complete Genome	Major	Full	2009-07-17	ASM2378v1	US DOE Joint Genome Institute	GCA_000023785.1	identical	ftp://ftp.ncbi.nlm.nih.gov/genomes/all/GCF/000/023/785/GCF_000023785.1_ASM2378v1		assembly from type material
GCF_000023825.1	PRJNA224116	SAMN02598456		representative genome	485917	984	Pedobacter heparinus DSM 2366	strain=DSM 2366		latest	Complete Genome	Major	Full	2009-08-05	ASM2382v1	US DOE Joint Genome Institute (JGI-PGF)	GCA_000023825.1	identical	ftp://ftp.ncbi.nlm.nih.gov/genomes/all/GCF/000/023/825/GCF_000023825.1_ASM2382v1		assembly from type material
GCF_000023845.1	PRJNA224116	SAMN02598434		representative genome	469378	84163	Cryptobacterium curtum DSM 15641	strain=DSM 15641		latest	Complete Genome	Major	Full	2009-08-26	ASM2384v1	US DOE Joint Genome Institute (JGI-PGF)	GCA_000023845.1	identical	ftp://ftp.ncbi.nlm.nih.gov/genomes/all/GCF/000/023/845/GCF_000023845.1_ASM2384v1		assembly from type material
GCF_000023865.1	PRJNA224116	SAMN02598440		representative genome	471857	1852	Saccharomonospora viridis DSM 43017	strain=DSM 43017		latest	Complete Genome	Major	Full	2009-08-26	ASM2386v1	US DOE Joint Genome Institute (JGI-PGF)	GCA_000023865.1	identical	ftp://ftp.ncbi.nlm.nih.gov/genomes/all/GCF/000/023/865/GCF_000023865.1_ASM2386v1		assembly from type material
GCF_000023885.1	PRJNA224116	SAMN02598438		representative genome	471855	84110	Slackia heliotrinireducens DSM 20476	strain=DSM 20476		latest	Complete Genome	Major	Full	2009-08-28	ASM2388v1	US DOE Joint Genome Institute (JGI-PGF)	GCA_000023885.1	identical	ftp://ftp.ncbi.nlm.nih.gov/genomes/all/GCF/000/023/885/GCF_000023885.1_ASM2388v1		assembly from type material
GCF_000023905.1	PRJNA224116	SAMN00002593		representative genome	523794	40542	Leptotrichia buccalis C-1013-b	strain=DSM 1135		latest	Complete Genome	Major	Full	2009-09-01	ASM2390v1	US DOE Joint Genome Institute (JGI-PGF)	GCA_000023905.1	identical	ftp://ftp.ncbi.nlm.nih.gov/genomes/all/GCF/000/023/905/GCF_000023905.1_ASM2390v1		assembly from type material
GCF_000023925.1	PRJNA224116	SAMN02598443		representative genome	478801	1276	Kytococcus sedentarius DSM 20547	strain=DSM 20547		latest	Complete Genome	Major	Full	2009-08-27	ASM2392v1	US DOE Joint Genome Institute (JGI-PGF)	GCA_000023925.1	identical	ftp://ftp.ncbi.nlm.nih.gov/genomes/all/GCF/000/023/925/GCF_000023925.1_ASM2392v1		assembly from type material
GCF_000023945.1	PRJNA224116	SAMN00002611		representative genome	519442	146826	Halorhabdus utahensis DSM 12940	strain=DSM 12940		latest	Complete Genome	Major	Full	2009-08-27	ASM2394v1	US DOE Joint Genome Institute (JGI-PGF)	GCA_000023945.1	identical	ftp://ftp.ncbi.nlm.nih.gov/genomes/all/GCF/000/023/945/GCF_000023945.1_ASM2394v1		assembly from type material
GCF_000023965.1	PRJNA224116	SAMN00002610		representative genome	485914	57705	Halomicrobium mukohataei DSM 12286	strain=DSM 12286		latest	Complete Genome	Major	Full	2009-09-03	ASM2396v1	US DOE Joint Genome Institute (JGI-PGF)	GCA_000023965.1	identical	ftp://ftp.ncbi.nlm.nih.gov/genomes/all/GCF/000/023/965/GCF_000023965.1_ASM2396v1		assembly from type material
GCF_000023985.1	PRJNA224116	SAMN02598490		representative genome	573064	83171	Methanocaldococcus fervens AG86	strain=AG86		latest	Complete Genome	Major	Full	2009-08-28	ASM2398v1	US DOE Joint Genome Institute (JGI-PGF)	GCA_000023985.1	identical	ftp://ftp.ncbi.nlm.nih.gov/genomes/all/GCF/000/023/985/GCF_000023985.1_ASM2398v1		assembly from type material
GCF_000024005.1	PRJNA224116	SAMN00001914		representative genome	485918	79329	Chitinophaga pinensis DSM 2588	strain=DSM 2588		latest	Complete Genome	Major	Full	2009-08-19	ASM2400v1	US DOE Joint Genome Institute (JGI-PGF)	GCA_000024005.1	identical	ftp://ftp.ncbi.nlm.nih.gov/genomes/all/GCF/000/024/005/GCF_000024005.1_ASM2400v1		assembly from type material
GCF_000024025.1	PRJNA224116	SAMN02598445		representative genome	479433	304895	Catenulispora acidiphila DSM 44928	strain=DSM 44928		latest	Complete Genome	Major	Full	2009-08-21	ASM2402v1	US DOE Joint Genome Institute (JGI-PGF)	GCA_000024025.1	identical	ftp://ftp.ncbi.nlm.nih.gov/genomes/all/GCF/000/024/025/GCF_000024025.1_ASM2402v1		assembly from type material
GCF_000024065.1	PRJNA224116	SAMN02598439		representative genome	471856	43674	Jonesia denitrificans DSM 20603	strain=DSM 20603		latest	Complete Genome	Major	Full	2009-08-27	ASM2406v1	US DOE Joint Genome Institute (JGI-PGF)	GCA_000024065.1	identical	ftp://ftp.ncbi.nlm.nih.gov/genomes/all/GCF/000/024/065/GCF_000024065.1_ASM2406v1		assembly from type material
GCF_000024085.1	PRJNA224116	SAMN00002604		representative genome	523791	261964	Kangiella koreensis DSM 16069	strain=DSM 16069		latest	Complete Genome	Major	Full	2009-08-28	ASM2408v1	US DOE Joint Genome Institute (JGI-PGF)	GCA_000024085.1	identical	ftp://ftp.ncbi.nlm.nih.gov/genomes/all/GCF/000/024/085/GCF_000024085.1_ASM2408v1		assembly from type material
GCF_000024105.1	PRJNA224116	SAMN00001908		representative genome	525919	33034	Anaerococcus prevotii DSM 20548	strain=DSM 20548		latest	Complete Genome	Major	Full	2009-08-28	ASM2410v1	US DOE Joint Genome Institute (JGI-PGF)	GCA_000024105.1	identical	ftp://ftp.ncbi.nlm.nih.gov/genomes/all/GCF/000/024/105/GCF_000024105.1_ASM2410v1		assembly from type material
GCF_000024125.1	PRJNA224116	SAMN02603916		representative genome	313596	252307	Robiginitalea biformata HTCC2501	strain=HTCC2501		latest	Complete Genome	Major	Full	2009-09-11	ASM2412v1	The Gordon and Betty Moore Foundation Marine Microbiology Initiative	GCA_000024125.1	identical	ftp://ftp.ncbi.nlm.nih.gov/genomes/all/GCF/000/024/125/GCF_000024125.1_ASM2412v1		assembly from type material
GCF_000024185.1	PRJNA224116	SAMN02603710		representative genome	634498	83816	Methanobrevibacter ruminantium M1	strain=M1		latest	Complete Genome	Major	Full	2010-02-05	ASM2418v1	Pastoral Greenhouse Gas Research Consortium	GCA_000024185.1	identical	ftp://ftp.ncbi.nlm.nih.gov/genomes/all/GCF/000/024/185/GCF_000024185.1_ASM2418v1		assembly from type material
GCF_000024205.1	PRJNA224116	SAMN02598455		representative genome	485916	58138	Desulfofarcimen acetoxidans DSM 771	strain=DSM 771		latest	Complete Genome	Major	Full	2009-09-10	ASM2420v1	US DOE Joint Genome Institute (JGI-PGF)	GCA_000024205.1	identical	ftp://ftp.ncbi.nlm.nih.gov/genomes/all/GCF/000/024/205/GCF_000024205.1_ASM2420v1		assembly from type material
GCF_000024225.1	PRJNA224116	SAMN00001907		representative genome	521095	1382	Atopobium parvulum DSM 20469	strain=DSM 20469		latest	Complete Genome	Major	Full	2009-09-09	ASM2422v1	US DOE Joint Genome Institute (JGI-PGF)	GCA_000024225.1	identical	ftp://ftp.ncbi.nlm.nih.gov/genomes/all/GCF/000/024/225/GCF_000024225.1_ASM2422v1		assembly from type material
GCF_000024265.1	PRJNA224116	SAMN00002594		representative genome	479437	84112	Eggerthella lenta DSM 2243	strain=DSM 2243		latest	Complete Genome	Major	Full	2009-09-09	ASM2426v1	US DOE Joint Genome Institute (JGI-PGF)	GCA_000024265.1	identical	ftp://ftp.ncbi.nlm.nih.gov/genomes/all/GCF/000/024/265/GCF_000024265.1_ASM2426v1		assembly from type material
GCF_000024285.1	PRJNA224116	SAMN00001901		representative genome	521098	405212	Alicyclobacillus acidocaldarius subsp. acidocaldarius DSM 446	strain=DSM 446		latest	Complete Genome	Major	Full	2009-09-09	ASM2428v1	US DOE Joint Genome Institute (JGI-PGF)	GCA_000024285.1	identical	ftp://ftp.ncbi.nlm.nih.gov/genomes/all/GCF/000/024/285/GCF_000024285.1_ASM2428v1		assembly from type material
GCF_000024325.1	PRJNA224116	SAMN02598459		representative genome	485915	45663	Desulfohalobium retbaense DSM 5692	strain=DSM 5692		latest	Complete Genome	Major	Full	2009-09-11	ASM2432v1	US DOE Joint Genome Institute (JGI-PGF)	GCA_000024325.1	identical	ftp://ftp.ncbi.nlm.nih.gov/genomes/all/GCF/000/024/325/GCF_000024325.1_ASM2432v1		assembly from type material
GCF_000024345.1	PRJNA224116	SAMN02598447		representative genome	479435	182640	Kribbella flavida DSM 17836	strain=DSM 17836		latest	Complete Genome	Major	Full	2010-01-13	ASM2434v1	US DOE Joint Genome Institute (JGI-PGF)	GCA_000024345.1	identical	ftp://ftp.ncbi.nlm.nih.gov/genomes/all/GCF/000/024/345/GCF_000024345.1_ASM2434v1		assembly from type material
GCF_000024365.1	PRJNA224116	SAMN02598467		representative genome	479431	53461	Nakamurella multipartita DSM 44233	strain=DSM 44233		latest	Complete Genome	Major	Full	2009-09-15	ASM2436v1	US DOE Joint Genome Institute (JGI-PGF)	GCA_000024365.1	identical	ftp://ftp.ncbi.nlm.nih.gov/genomes/all/GCF/000/024/365/GCF_000024365.1_ASM2436v1		assembly from type material
GCF_000024385.1	PRJNA224116	SAMN02598435		representative genome	471852	2020	Thermomonospora curvata DSM 43183	strain=DSM 43183		latest	Complete Genome	Major	Full	2009-11-16	ASM2438v1	US DOE Joint Genome Institute (JGI-PGF)	GCA_000024385.1	identical	ftp://ftp.ncbi.nlm.nih.gov/genomes/all/GCF/000/024/385/GCF_000024385.1_ASM2438v1		assembly from type material
GCF_000024405.1	PRJNA224116	SAMN02598468		representative genome	526218	826	Sebaldella termitidis ATCC 33386	strain=ATCC 33386		latest	Complete Genome	Major	Full	2009-11-18	ASM2440v1	US DOE Joint Genome Institute (JGI-PGF)	GCA_000024405.1	identical	ftp://ftp.ncbi.nlm.nih.gov/genomes/all/GCF/000/024/405/GCF_000024405.1_ASM2440v1		assembly from type material
GCF_000024425.1	PRJNA224116	SAMN00002601		representative genome	504728	277	Meiothermus ruber DSM 1279			latest	Complete Genome	Major	Full	2010-03-03	ASM2442v1	US DOE Joint Genome Institute (JGI-PGF)	GCA_000024425.1	identical	ftp://ftp.ncbi.nlm.nih.gov/genomes/all/GCF/000/024/425/GCF_000024425.1_ASM2442v1		assembly from type material
GCF_000024505.1	PRJNA224116	SAMN02604279		representative genome	574556	769	Anaplasma centrale str. Israel	strain=Israel		latest	Complete Genome	Major	Full	2009-11-24	ASM2450v1	USDA-ARS	GCA_000024505.1	identical	ftp://ftp.ncbi.nlm.nih.gov/genomes/all/GCF/000/024/505/GCF_000024505.1_ASM2450v1		assembly designated as reftype
GCF_000024545.1	PRJNA224116	SAMN02598427		representative genome	446470	283811	Stackebrandtia nassauensis DSM 44728	strain=DSM 44728		latest	Complete Genome	Major	Full	2010-03-05	ASM2454v1	US DOE Joint Genome Institute (JGI-PGF)	GCA_000024545.1	identical	ftp://ftp.ncbi.nlm.nih.gov/genomes/all/GCF/000/024/545/GCF_000024545.1_ASM2454v1		assembly from type material
GCF_000024565.1	PRJNA224116	SAMN00002603		representative genome	519441	34105	Streptobacillus moniliformis DSM 12112	strain=DSM 12112		latest	Complete Genome	Major	Full	2009-11-16	ASM2456v1	US DOE Joint Genome Institute (JGI-PGF)	GCA_000024565.1	identical	ftp://ftp.ncbi.nlm.nih.gov/genomes/all/GCF/000/024/565/GCF_000024565.1_ASM2456v1		assembly from type material
GCF_000024605.1	PRJNA224116	SAMN02598268		representative genome	429009	42838	Ammonifex degensii KC4	strain=KC4		latest	Complete Genome	Major	Full	2009-10-08	ASM2460v1	US DOE Joint Genome Institute	GCA_000024605.1	identical	ftp://ftp.ncbi.nlm.nih.gov/genomes/all/GCF/000/024/605/GCF_000024605.1_ASM2460v1		assembly from type material
GCF_000024625.1	PRJNA224116	SAMN02598493		representative genome	579137	73913	Methanocaldococcus vulcanius M7	strain=M7		latest	Complete Genome	Major	Full	2009-10-15	ASM2462v1	US DOE Joint Genome Institute (JGI-PGF)	GCA_000024625.1	identical	ftp://ftp.ncbi.nlm.nih.gov/genomes/all/GCF/000/024/625/GCF_000024625.1_ASM2462v1		assembly from type material
GCF_000024725.1	PRJNA224116	SAMN02598510		representative genome	472759	133539	Nitrosococcus halophilus Nc 4	strain=Nc 4		latest	Complete Genome	Major	Full	2010-03-26	ASM2472v1	US DOE Joint Genome Institute	GCA_000024725.1	identical	ftp://ftp.ncbi.nlm.nih.gov/genomes/all/GCF/000/024/725/GCF_000024725.1_ASM2472v1		assembly from type material
GCF_000024765.1	PRJNA224116	SAMN02598477		representative genome	555778	927	Halothiobacillus neapolitanus c2	strain=c2		latest	Complete Genome	Major	Full	2009-10-21	ASM2476v1	US DOE Joint Genome Institute (JGI-PGF)	GCA_000024765.1	identical	ftp://ftp.ncbi.nlm.nih.gov/genomes/all/GCF/000/024/765/GCF_000024765.1_ASM2476v1		assembly from type material
GCF_000024785.1	PRJNA224116	SAMN00002600		representative genome	526226	2054	Gordonia bronchialis DSM 43247	strain=DSM 43247		latest	Complete Genome	Major	Full	2009-10-27	ASM2478v1	US DOE Joint Genome Institute (JGI-PGF)	GCA_000024785.1	identical	ftp://ftp.ncbi.nlm.nih.gov/genomes/all/GCF/000/024/785/GCF_000024785.1_ASM2478v1		assembly from type material
GCF_000024845.1	PRJNA224116	SAMN00002700		representative genome	518766	29549	Rhodothermus marinus DSM 4252	strain=DSM 4252		latest	Complete Genome	Major	Full	2009-11-03	ASM2484v1	US DOE Joint Genome Institute (JGI-PGF)	GCA_000024845.1	identical	ftp://ftp.ncbi.nlm.nih.gov/genomes/all/GCF/000/024/845/GCF_000024845.1_ASM2484v1		assembly from type material
GCF_000024865.1	PRJNA224116	SAMN00002585		representative genome	479432	2001	Streptosporangium roseum DSM 43021	strain=DSM 43021		latest	Complete Genome	Major	Full	2009-12-10	ASM2486v1	US DOE Joint Genome Institute (JGI-PGF)	GCA_000024865.1	identical	ftp://ftp.ncbi.nlm.nih.gov/genomes/all/GCF/000/024/865/GCF_000024865.1_ASM2486v1		assembly from type material
GCF_000024885.1	PRJNA224116	SAMN00002613		representative genome	525898	65553	Sulfurospirillum deleyianum DSM 6946	strain=DSM 6946		latest	Complete Genome	Major	Full	2009-11-18	ASM2488v1	US DOE Joint Genome Institute (JGI-PGF)	GCA_000024885.1	identical	ftp://ftp.ncbi.nlm.nih.gov/genomes/all/GCF/000/024/885/GCF_000024885.1_ASM2488v1		assembly from type material
GCF_000024925.1	PRJNA224116	SAMN02598426		representative genome	446469	60920	Sanguibacter keddieii DSM 10542	strain=DSM 10542		latest	Complete Genome	Major	Full	2009-11-19	ASM2492v1	US DOE Joint Genome Institute (JGI-PGF)	GCA_000024925.1	identical	ftp://ftp.ncbi.nlm.nih.gov/genomes/all/GCF/000/024/925/GCF_000024925.1_ASM2492v1		assembly from type material
GCF_000024945.1	PRJNA224116	SAMN00002609		representative genome	479436	29466	Veillonella parvula DSM 2008	strain=DSM 2008		latest	Complete Genome	Major	Full	2009-11-19	ASM2494v1	US DOE Joint Genome Institute (JGI-PGF)	GCA_000024945.1	identical	ftp://ftp.ncbi.nlm.nih.gov/genomes/all/GCF/000/024/945/GCF_000024945.1_ASM2494v1		assembly from type material
GCF_000024965.1	PRJNA224116	SAMN00002456		representative genome	446471	186189	Xylanimonas cellulosilytica DSM 15894	strain=DSM 15894		latest	Complete Genome	Major	Full	2009-11-20	ASM2496v1	US DOE Joint Genome Institute (JGI-PGF)	GCA_000024965.1	identical	ftp://ftp.ncbi.nlm.nih.gov/genomes/all/GCF/000/024/965/GCF_000024965.1_ASM2496v1		assembly from type material
GCF_000024985.1	PRJNA224116	SAMN02598446		representative genome	479434	2057	Sphaerobacter thermophilus DSM 20745	strain=DSM 20745		latest	Complete Genome	Major	Full	2009-11-23	ASM2498v1	US DOE Joint Genome Institute (JGI-PGF)	GCA_000024985.1	identical	ftp://ftp.ncbi.nlm.nih.gov/genomes/all/GCF/000/024/985/GCF_000024985.1_ASM2498v1		assembly from type material
GCF_000025005.1	PRJNA224116	SAMN00017581		representative genome	525904	166501	Thermobaculum terrenum ATCC BAA-798	strain=ATCC BAA-798		latest	Complete Genome	Major	Full	2009-11-23	ASM2500v1	US DOE Joint Genome Institute (JGI-PGF)	GCA_000025005.1	identical	ftp://ftp.ncbi.nlm.nih.gov/genomes/all/GCF/000/025/005/GCF_000025005.1_ASM2500v1		assembly from type material
GCF_000025065.1	PRJNA224116	SAMN02598506		representative genome	590409	204042	Dickeya zeae Ech586	strain=Ech586		latest	Complete Genome	Major	Full	2009-12-09	ASM2506v1	US DOE Joint Genome Institute (JGI-PGF)	GCA_000025065.1	identical	ftp://ftp.ncbi.nlm.nih.gov/genomes/all/GCF/000/025/065/GCF_000025065.1_ASM2506v1
GCF_000025085.1	PRJNA224116	SAMN02603957		representative genome	698737	28035	Staphylococcus lugdunensis HKU09-01	strain=HKU09-01		latest	Complete Genome	Major	Full	2010-02-19	ASM2508v1	The University of Hong Kong	GCA_000025085.1	identical	ftp://ftp.ncbi.nlm.nih.gov/genomes/all/GCF/000/025/085/GCF_000025085.1_ASM2508v1
GCF_000025185.1	PRJNA224116	SAMN00120219		representative genome	530564	125	Pirellula staleyi DSM 6068	strain=DSM 6068		latest	Complete Genome	Major	Full	2010-01-07	ASM2518v1	US DOE Joint Genome Institute (JGI-PGF)	GCA_000025185.1	identical	ftp://ftp.ncbi.nlm.nih.gov/genomes/all/GCF/000/025/185/GCF_000025185.1_ASM2518v1		assembly from type material
GCF_000025205.1	PRJNA224116	SAMN02299422		representative genome	553190	2702	Gardnerella vaginalis 409-05	strain=409-05		latest	Complete Genome	Major	Full	2010-01-07	ASM2520v1	J. Craig Venter Institute	GCA_000025205.1	identical	ftp://ftp.ncbi.nlm.nih.gov/genomes/all/GCF/000/025/205/GCF_000025205.1_ASM2520v1
GCF_000025225.2	PRJNA224116	SAMN00006219		representative genome	699246	884684	Mageeibacillus indolicus UPII9-5	strain=UPII9-5		latest	Complete Genome	Major	Full	2010-09-21	ASM2522v1	JCVI	GCA_000025225.2	identical	ftp://ftp.ncbi.nlm.nih.gov/genomes/all/GCF/000/025/225/GCF_000025225.2_ASM2522v1
GCF_000025265.1	PRJNA224116	SAMN00002582		representative genome	469383	191495	Conexibacter woesei DSM 14684	strain=DSM 14684		latest	Complete Genome	Major	Full	2010-01-15	ASM2526v1	US DOE Joint Genome Institute (JGI-PGF)	GCA_000025265.1	identical	ftp://ftp.ncbi.nlm.nih.gov/genomes/all/GCF/000/025/265/GCF_000025265.1_ASM2526v1		assembly from type material
GCF_000025285.1	PRJNA224116	SAMN00017459		representative genome	572546	84156	Archaeoglobus profundus DSM 5631	strain=DSM 5631		latest	Complete Genome	Major	Full	2010-01-19	ASM2528v1	US DOE Joint Genome Institute (JGI-PGF)	GCA_000025285.1	identical	ftp://ftp.ncbi.nlm.nih.gov/genomes/all/GCF/000/025/285/GCF_000025285.1_ASM2528v1		assembly from type material
GCF_000025305.1	PRJNA224116	SAMN02598507		representative genome	591001	905	Acidaminococcus fermentans DSM 20731	strain=DSM 20731		latest	Complete Genome	Major	Full	2010-01-15	ASM2530v1	US DOE Joint Genome Institute (JGI-PGF)	GCA_000025305.1	identical	ftp://ftp.ncbi.nlm.nih.gov/genomes/all/GCF/000/025/305/GCF_000025305.1_ASM2530v1		assembly from type material
GCF_000025325.1	PRJNA224116	SAMN02598471		representative genome	543526	62320	Haloterrigena turkmenica DSM 5511	strain=DSM 5511		latest	Complete Genome	Major	Full	2010-01-19	ASM2532v1	US DOE Joint Genome Institute (JGI-PGF)	GCA_000025325.1	identical	ftp://ftp.ncbi.nlm.nih.gov/genomes/all/GCF/000/025/325/GCF_000025325.1_ASM2532v1		assembly from type material
GCF_000025345.1	PRJNA224116	SAMN00002612		representative genome	526225	1861	Geodermatophilus obscurus DSM 43160	strain=DSM 43160		latest	Complete Genome	Major	Full	2010-01-20	ASM2534v1	US DOE Joint Genome Institute (JGI-PGF)	GCA_000025345.1	identical	ftp://ftp.ncbi.nlm.nih.gov/genomes/all/GCF/000/025/345/GCF_000025345.1_ASM2534v1		assembly from type material
GCF_000025405.2	PRJNA224116	SAMN02603236		representative genome	706191	553	Pantoea ananatis LMG 20103	strain=LMG 20103		latest	Complete Genome	Major	Full	2011-03-24	ASM2540v1	Forestry and Agricultural Biotechnology Institute	GCA_000025405.2	identical	ftp://ftp.ncbi.nlm.nih.gov/genomes/all/GCF/000/025/405/GCF_000025405.2_ASM2540v1
GCF_000025485.1	PRJNA224116	SAMN02598487		representative genome	572477	1049	Allochromatium vinosum DSM 180	strain=DSM 180		latest	Complete Genome	Major	Full	2010-02-16	ASM2548v1	US DOE Joint Genome Institute (JGI-PGF)	GCA_000025485.1	identical	ftp://ftp.ncbi.nlm.nih.gov/genomes/all/GCF/000/025/485/GCF_000025485.1_ASM2548v1		assembly from type material
GCF_000025505.1	PRJNA224116	SAMN02598503		representative genome	589924	54261	Ferroglobus placidus DSM 10642	strain=DSM 10642		latest	Complete Genome	Major	Full	2010-02-16	ASM2550v1	US DOE Joint Genome Institute	GCA_000025505.1	identical	ftp://ftp.ncbi.nlm.nih.gov/genomes/all/GCF/000/025/505/GCF_000025505.1_ASM2550v1		assembly from type material
GCF_000025605.1	PRJNA224116	SAMN02598512		representative genome	638303	136094	Thermocrinis albus DSM 14484	strain=DSM 14484		latest	Complete Genome	Major	Full	2010-02-19	ASM2560v1	US DOE Joint Genome Institute (JGI-PGF)	GCA_000025605.1	identical	ftp://ftp.ncbi.nlm.nih.gov/genomes/all/GCF/000/025/605/GCF_000025605.1_ASM2560v1		assembly from type material
GCF_000025625.1	PRJNA224116	SAMN02598473		representative genome	547559	13769	Natrialba magadii ATCC 43099	strain=ATCC 43099		latest	Complete Genome	Major	Full	2010-02-24	ASM2562v1	US DOE Joint Genome Institute (JGI-PGF)	GCA_000025625.1	identical	ftp://ftp.ncbi.nlm.nih.gov/genomes/all/GCF/000/025/625/GCF_000025625.1_ASM2562v1		assembly from type material
GCF_000025645.1	PRJNA224116	SAMN02598495		representative genome	580331	108150	Thermoanaerobacter italicus Ab9	strain=Ab9		latest	Complete Genome	Major	Full	2010-02-24	ASM2564v1	US DOE Joint Genome Institute (JGI-PGF)	GCA_000025645.1	identical	ftp://ftp.ncbi.nlm.nih.gov/genomes/all/GCF/000/025/645/GCF_000025645.1_ASM2564v1		assembly from type material
GCF_000025665.1	PRJNA224116	SAMN02598523		representative genome	439481	379547	Aciduliprofundum boonei T469	strain=T469		latest	Complete Genome	Major	Full	2010-02-24	ASM2566v1	US DOE Joint Genome Institute	GCA_000025665.1	identical	ftp://ftp.ncbi.nlm.nih.gov/genomes/all/GCF/000/025/665/GCF_000025665.1_ASM2566v1
GCF_000025685.1	PRJNA224116	SAMN02604027		representative genome	309800	2246	Haloferax volcanii DS2	strain=DS2		latest	Complete Genome	Major	Full	2010-03-23	ASM2568v1	TIGR	GCA_000025685.1	identical	ftp://ftp.ncbi.nlm.nih.gov/genomes/all/GCF/000/025/685/GCF_000025685.1_ASM2568v1		assembly from type material
GCF_000025705.1	PRJNA224116	SAMN02598496		representative genome	580332	63745	Sideroxydans lithotrophicus ES-1	strain=ES-1		latest	Complete Genome	Major	Full	2010-03-26	ASM2570v1	US DOE Joint Genome Institute (JGI-PGF)	GCA_000025705.1	identical	ftp://ftp.ncbi.nlm.nih.gov/genomes/all/GCF/000/025/705/GCF_000025705.1_ASM2570v1		assembly from type material
GCF_000025725.1	PRJNA224116	SAMN02598464		representative genome	522772	118000	Denitrovibrio acetiphilus DSM 12809	strain=DSM 12809		latest	Complete Genome	Major	Full	2010-03-11	ASM2572v1	US DOE Joint Genome Institute (JGI-PGF)	GCA_000025725.1	identical	ftp://ftp.ncbi.nlm.nih.gov/genomes/all/GCF/000/025/725/GCF_000025725.1_ASM2572v1		assembly from type material
GCF_000025845.1	PRJNA224116	SAMN02603450		representative genome	512564	50052	Mycoplasma crocodyli MP145	strain=MP145		latest	Complete Genome	Major	Full	2010-03-26	ASM2584v1	J. Craig Venter Institute	GCA_000025845.1	identical	ftp://ftp.ncbi.nlm.nih.gov/genomes/all/GCF/000/025/845/GCF_000025845.1_ASM2584v1		assembly from type material
GCF_000025865.1	PRJNA224116	SAMN02598474		representative genome	547558	2176	Methanohalophilus mahii DSM 5219	strain=DSM 5219		latest	Complete Genome	Major	Full	2010-03-31	ASM2586v1	US DOE Joint Genome Institute (JGI-PGF)	GCA_000025865.1	identical	ftp://ftp.ncbi.nlm.nih.gov/genomes/all/GCF/000/025/865/GCF_000025865.1_ASM2586v1		assembly from type material
GCF_000025885.1	PRJNA224116	SAMN02598488		representative genome	572547	81468	Aminobacterium colombiense DSM 12261	strain=DSM 12261		latest	Complete Genome	Major	Full	2010-04-05	ASM2588v1	US DOE Joint Genome Institute (JGI-PGF)	GCA_000025885.1	identical	ftp://ftp.ncbi.nlm.nih.gov/genomes/all/GCF/000/025/885/GCF_000025885.1_ASM2588v1		assembly from type material
GCF_000025905.1	PRJNA224116	SAMN02598501		representative genome	583355	395922	Coraliomargarita akajimensis DSM 45221	strain=DSM 45221		latest	Complete Genome	Major	Full	2010-04-05	ASM2590v1	US DOE Joint Genome Institute (JGI-PGF)	GCA_000025905.1	identical	ftp://ftp.ncbi.nlm.nih.gov/genomes/all/GCF/000/025/905/GCF_000025905.1_ASM2590v1		assembly from type material
GCF_000025925.1	PRJNA224116	SAMN02604020		representative genome	264731	839	Prevotella ruminicola 23	strain=Bryant 23		latest	Complete Genome	Major	Full	2010-04-09	ASM2592v1	TIGR	GCA_000025925.1	identical	ftp://ftp.ncbi.nlm.nih.gov/genomes/all/GCF/000/025/925/GCF_000025925.1_ASM2592v1		assembly from type material
GCF_000025945.1	PRJNA224116	SAMEA3138217		representative genome	177439	84980	Desulfotalea psychrophila LSv54	strain=LSv54		latest	Complete Genome	Major	Full	2004-07-31	ASM2594v1	e.gene Biotechnologie GmbH	GCA_000025945.1	identical	ftp://ftp.ncbi.nlm.nih.gov/genomes/all/GCF/000/025/945/GCF_000025945.1_ASM2594v1		assembly from type material
GCF_000025965.1	PRJNA224116	SAMEA3138218		representative genome	76114	551760	Aromatoleum aromaticum EbN1	strain=EbN1		latest	Complete Genome	Major	Full	2004-12-03	ASM2596v1	Max Planck Institute	GCA_000025965.1	identical	ftp://ftp.ncbi.nlm.nih.gov/genomes/all/GCF/000/025/965/GCF_000025965.1_ASM2596v1
GCF_000026005.1	PRJNA224116	SAMEA1705918		representative genome	254945	779	Ehrlichia ruminantium str. Welgevonden	strain=Welgevonden		latest	Complete Genome	Major	Full	2005-01-05	ASM2600v1	University of Pretoria, South Africa	GCA_000026005.1	identical	ftp://ftp.ncbi.nlm.nih.gov/genomes/all/GCF/000/026/005/GCF_000026005.1_ASM2600v1		assembly from type material
GCF_000026045.1	PRJNA224116	SAMEA3138222		representative genome	348780	2257	Natronomonas pharaonis DSM 2160	strain=Gabara		latest	Complete Genome	Major	Full	2005-09-28	ASM2604v1	Max Planck Institute	GCA_000026045.1	identical	ftp://ftp.ncbi.nlm.nih.gov/genomes/all/GCF/000/026/045/GCF_000026045.1_ASM2604v1		assembly from type material
GCF_000026125.1	PRJNA224116	SAMEA3138226		representative genome	204773	204773	Herminiimonas arsenicoxydans			latest	Complete Genome	Major	Full	2007-03-16	ASM2612v1	Genoscope	GCA_000026125.1	identical	ftp://ftp.ncbi.nlm.nih.gov/genomes/all/GCF/000/026/125/GCF_000026125.1_ASM2612v1
GCF_000026405.1	PRJNA224116	SAMN02603482		representative genome	349519	33964	Leuconostoc citreum KM20	strain=KM20		latest	Complete Genome	Major	Full	2008-03-12	ASM2640v1	Korea Research Institute of Bioscience and Biotechnology (KRIBB)	GCA_000026405.1	identical	ftp://ftp.ncbi.nlm.nih.gov/genomes/all/GCF/000/026/405/GCF_000026405.1_ASM2640v1
GCF_000026505.1	PRJNA224116	SAMEA2272375		representative genome	568703	47715	Lactobacillus rhamnosus GG	strain=GG (ATCC 53103)		latest	Complete Genome	Major	Full	2009-09-02	ASM2650v1	Institute of Biotechnology, University of Helsinki, Finland	GCA_000026505.1	identical	ftp://ftp.ncbi.nlm.nih.gov/genomes/all/GCF/000/026/505/GCF_000026505.1_ASM2650v1
GCF_000026605.1	PRJNA224116	SAMEA2272197		representative genome	40041	1336	Streptococcus equi subsp. zooepidemicus	strain=H70		latest	Complete Genome	Major	Full	2009-03-26	ASM2660v1	The Wellcome Trust Sanger Institute	GCA_000026605.1	identical	ftp://ftp.ncbi.nlm.nih.gov/genomes/all/GCF/000/026/605/GCF_000026605.1_ASM2660v1
GCF_000026945.1	PRJNA38659	SAMEA2272258		representative genome	573826	42374	Candida dubliniensis CD36	strain=CD36		latest	Complete Genome	Major	Full	2009-02-16	ASM2694v1	Wellcome Trust Sanger Institute	GCA_000026945.1	identical	ftp://ftp.ncbi.nlm.nih.gov/genomes/all/GCF/000/026/945/GCF_000026945.1_ASM2694v1		assembly from type material
GCF_000027225.1	PRJNA224116	SAMEA3138245		representative genome	406818	40576	Xenorhabdus bovienii SS-2004	strain=SS-2004		latest	Complete Genome	Major	Full	2010-02-18	ASM2722v1	Danforth Science Center	GCA_000027225.1	identical	ftp://ftp.ncbi.nlm.nih.gov/genomes/all/GCF/000/027/225/GCF_000027225.1_ASM2722v1
GCF_000027325.1	PRJNA224116	SAMN02603983		representative genome	243273	2097	Mycoplasma genitalium G37	strain=G-37		latest	Complete Genome	Major	Full	2006-01-09	ASM2732v1	TIGR	GCA_000027325.1	identical	ftp://ftp.ncbi.nlm.nih.gov/genomes/all/GCF/000/027/325/GCF_000027325.1_ASM2732v1		assembly from type material
GCF_000046685.1	PRJNA224116	SAMEA3138248		representative genome	283165	803	Bartonella quintana str. Toulouse	strain=Toulouse		latest	Complete Genome	Major	Full	2004-06-25	ASM4668v1	Uppsala Univ.	GCA_000046685.1	identical	ftp://ftp.ncbi.nlm.nih.gov/genomes/all/GCF/000/046/685/GCF_000046685.1_ASM4668v1
GCF_000046705.1	PRJNA224116	SAMEA3138249		representative genome	283166	38323	Bartonella henselae str. Houston-1	strain=Houston-1		latest	Complete Genome	Major	Full	2004-06-25	ASM4670v1	Uppsala Univ.	GCA_000046705.1	identical	ftp://ftp.ncbi.nlm.nih.gov/genomes/all/GCF/000/046/705/GCF_000046705.1_ASM4670v1		assembly from type material
GCF_000055785.1	PRJNA224116	SAMN02598275		representative genome	290398	158080	Chromohalobacter salexigens DSM 3043	strain=DSM 3043		latest	Complete Genome	Major	Full	2006-04-11	ASM5578v1	DOE Joint Genome Institute	GCA_000055785.1	identical	ftp://ftp.ncbi.nlm.nih.gov/genomes/all/GCF/000/055/785/GCF_000055785.1_ASM5578v1		assembly from type material
GCF_000055945.1	PRJNA224116	SAMEA3138257		representative genome	363253	29546	Lawsonia intracellularis PHE/MN1-00	strain=PHE/MN1-00		latest	Complete Genome	Major	Full	2006-05-05	ASM5594v1	Univ. Minnesota	GCA_000055945.1	identical	ftp://ftp.ncbi.nlm.nih.gov/genomes/all/GCF/000/055/945/GCF_000055945.1_ASM5594v1
GCF_000056065.1	PRJNA224116	SAMEA3138258		representative genome	390333	1584	Lactobacillus delbrueckii subsp. bulgaricus ATCC 11842 = JCM 1002	strain=ATCC 11842		latest	Complete Genome	Major	Full	2006-05-26	ASM5606v1	Genoscope	GCA_000056065.1	identical	ftp://ftp.ncbi.nlm.nih.gov/genomes/all/GCF/000/056/065/GCF_000056065.1_ASM5606v1		assembly from type material
GCF_000058485.1	PRJNA224116	SAMEA3138259		representative genome	326424	1859	Frankia alni ACN14a	strain=ACN14A		latest	Complete Genome	Major	Full	2006-08-03	ASM5848v1	Genoscope	GCA_000058485.1	identical	ftp://ftp.ncbi.nlm.nih.gov/genomes/all/GCF/000/058/485/GCF_000058485.1_ASM5848v1		assembly from type material
GCF_000060345.1	PRJNA224116	SAMEA2272667		representative genome	411154	411153	Gramella forsetii KT0803	strain=KT0803		latest	Complete Genome	Major	Full	2006-11-06	ASM6034v1	Max Planck Institute for Molecular Genetics	GCA_000060345.1	identical	ftp://ftp.ncbi.nlm.nih.gov/genomes/all/GCF/000/060/345/GCF_000060345.1_ASM6034v1		assembly from type material
GCF_000062885.1	PRJNA224116	SAMEA2272514		representative genome	405948	1836	Saccharopolyspora erythraea NRRL 2338	strain=NRRL 2338		latest	Complete Genome	Major	Full	2007-03-21	ASM6288v1	Department of Biochemistry, University of Cambridge	GCA_000062885.1	identical	ftp://ftp.ncbi.nlm.nih.gov/genomes/all/GCF/000/062/885/GCF_000062885.1_ASM6288v1		assembly from type material
GCF_000063445.1	PRJNA224116	SAMEA3138262		representative genome	351160	1175445	Methanocella arvoryzae MRE50	strain=MRE50		latest	Complete Genome	Major	Full	2006-10-12	ASM6344v1	Max Planck Institute	GCA_000063445.1	identical	ftp://ftp.ncbi.nlm.nih.gov/genomes/all/GCF/000/063/445/GCF_000063445.1_ASM6344v1		assembly from type material
GCF_000063545.1	PRJNA224116	SAMEA3138266		representative genome	357244	784	Orientia tsutsugamushi str. Boryong	strain=Boryong		latest	Complete Genome	Major	Full	2007-05-15	ASM6354v1	Seoul National University College of Medicine	GCA_000063545.1	identical	ftp://ftp.ncbi.nlm.nih.gov/genomes/all/GCF/000/063/545/GCF_000063545.1_ASM6354v1
GCF_000063605.1	PRJNA224116	SAMEA3138268		representative genome	347257	2110	Mycoplasma agalactiae PG2	strain=PG2		latest	Complete Genome	Major	Full	2007-05-24	ASM6360v1	Genoscope	GCA_000063605.1	identical	ftp://ftp.ncbi.nlm.nih.gov/genomes/all/GCF/000/063/605/GCF_000063605.1_ASM6360v1		assembly from type material
GCF_000067165.1	PRJNA224116	SAMEA3138271		representative genome	448385	56	Sorangium cellulosum So ce56	strain=So ce 56		latest	Complete Genome	Major	Full	2007-11-27	ASM6716v1	Bielefeld Univ	GCA_000067165.1	identical	ftp://ftp.ncbi.nlm.nih.gov/genomes/all/GCF/000/067/165/GCF_000067165.1_ASM6716v1
GCF_000067205.1	PRJNA224116	SAMEA3138272		representative genome	94624	94624	Bordetella petrii	strain=DSM 12804		latest	Complete Genome	Major	Full	2007-12-18	ASM6720v1	Bielefeld Univ	GCA_000067205.1	identical	ftp://ftp.ncbi.nlm.nih.gov/genomes/all/GCF/000/067/205/GCF_000067205.1_ASM6720v1		assembly from type material
GCF_000069225.1	PRJNA224116	SAMEA1705948		representative genome	31964	28447	Clavibacter michiganensis subsp. sepedonicus	strain=ATCC 33113		latest	Complete Genome	Major	Full	2008-02-29	ASM6922v1	Sanger Institute	GCA_000069225.1	identical	ftp://ftp.ncbi.nlm.nih.gov/genomes/all/GCF/000/069/225/GCF_000069225.1_ASM6922v1		assembly from type material
GCF_000069945.1	PRJNA224116	SAMEA3138282		representative genome	504474	43771	Corynebacterium urealyticum DSM 7109	strain=DSM 7109		latest	Complete Genome	Major	Full	2008-04-02	ASM6994v1	Bielefeld Univ	GCA_000069945.1	identical	ftp://ftp.ncbi.nlm.nih.gov/genomes/all/GCF/000/069/945/GCF_000069945.1_ASM6994v1		assembly from type material
GCF_000069965.1	PRJNA224116	SAMEA1705945		representative genome	529507	584	Proteus mirabilis HI4320	strain=HI4320		latest	Complete Genome	Major	Full	2008-04-03	ASM6996v1	Sanger Institute	GCA_000069965.1	identical	ftp://ftp.ncbi.nlm.nih.gov/genomes/all/GCF/000/069/965/GCF_000069965.1_ASM6996v1
GCF_000070465.1	PRJNA224116	SAMEA1705952		representative genome	360910	521	Bordetella avium 197N	strain=197N		latest	Complete Genome	Major	Full	2006-09-29	ASM7046v1	Sanger Institute	GCA_000070465.1	identical	ftp://ftp.ncbi.nlm.nih.gov/genomes/all/GCF/000/070/465/GCF_000070465.1_ASM7046v1
GCF_000072485.1	PRJNA224116	SAMEA1705934		representative genome	522373	40324	Stenotrophomonas maltophilia K279a	strain=K279a		latest	Complete Genome	Major	Full	2008-06-10	ASM7248v1	Wellcome Trust Sanger Institute	GCA_000072485.1	identical	ftp://ftp.ncbi.nlm.nih.gov/genomes/all/GCF/000/072/485/GCF_000072485.1_ASM7248v1
GCF_000085865.1	PRJNA224116	SAMEA2272593		representative genome	347256	2098	Mycoplasma hominis ATCC 23114	strain=ATCC 23114		latest	Complete Genome	Major	Full	2009-11-16	ASM8586v1	Genoscope	GCA_000085865.1	identical	ftp://ftp.ncbi.nlm.nih.gov/genomes/all/GCF/000/085/865/GCF_000085865.1_ASM8586v1		assembly from type material
GCF_000090965.1	PRJNA224116	SAMN02604290		representative genome	372461	9	Buchnera aphidicola BCc	strain=BCc		latest	Complete Genome	Major	Full	2006-10-18	ASM9096v1	Valencia Univ.	GCA_000090965.1	identical	ftp://ftp.ncbi.nlm.nih.gov/genomes/all/GCF/000/090/965/GCF_000090965.1_ASM9096v1
GCF_000090985.2	PRJNA39769	SAMN03081421		representative genome	296587	296587	Micromonas commoda	strain=RCC299		latest	Complete Genome	Major	Full	2009-04-10	ASM9098v2	Micromonas genome consortium	GCA_000090985.2	identical	ftp://ftp.ncbi.nlm.nih.gov/genomes/all/GCF/000/090/985/GCF_000090985.2_ASM9098v2		assembly from type material
GCF_000091025.4	PRJNA10623	SAMN03081415		representative genome	284811	33169	Eremothecium gossypii ATCC 10895	strain=ATCC 10895		latest	Complete Genome	Major	Full	2010-10-18	ASM9102v4	Biozentrum, University of Basel, Switzerland	GCA_000091025.4	identical	ftp://ftp.ncbi.nlm.nih.gov/genomes/all/GCF/000/091/025/GCF_000091025.4_ASM9102v4
GCF_000091125.1	PRJNA224116	SAMD00060927		representative genome	452662	332056	Sphingobium japonicum UT26S	strain=UT26S		latest	Complete Genome	Major	Full	2010-03-31	ASM9112v1	National Institute of Technology and Evaluation (NITE)	GCA_000091125.1	identical	ftp://ftp.ncbi.nlm.nih.gov/genomes/all/GCF/000/091/125/GCF_000091125.1_ASM9112v1		assembly from type material
GCF_000091205.1	PRJNA28057			representative genome	280699	45157	Cyanidioschyzon merolae strain 10D	strain=10D		latest	Complete Genome	Major	Full	2007-07-11	ASM9120v1	National Institute of Genetics, Japan	GCA_000091205.1	identical	ftp://ftp.ncbi.nlm.nih.gov/genomes/all/GCF/000/091/205/GCF_000091205.1_ASM9120v1
GCF_000091305.1	PRJNA224116	SAMEA2272773		representative genome	680198	1930	Streptomyces scabiei 87.22	strain=87.22		latest	Complete Genome	Major	Full	2009-10-06	ASM9130v1	Wellcome Trust Sanger Institute	GCA_000091305.1	identical	ftp://ftp.ncbi.nlm.nih.gov/genomes/all/GCF/000/091/305/GCF_000091305.1_ASM9130v1		assembly from proxytype material
GCF_000091325.1	PRJNA224116	SAMD00060963		representative genome	637905	60217	Shewanella violacea DSS12	strain=DSS12		latest	Complete Genome	Major	Full	2010-04-01	ASM9132v1	Nara Institute of Science and Technology	GCA_000091325.1	identical	ftp://ftp.ncbi.nlm.nih.gov/genomes/all/GCF/000/091/325/GCF_000091325.1_ASM9132v1		assembly from type material
GCF_000091465.1	PRJNA224116	SAMEA2271989		representative genome	575788	212663	Vibrio tasmaniensis LGP32	strain=LGP32		latest	Complete Genome	Major	Full	2009-02-13	ASM9146v1	Institut Pasteur	GCA_000091465.1	identical	ftp://ftp.ncbi.nlm.nih.gov/genomes/all/GCF/000/091/465/GCF_000091465.1_ASM9146v1
GCF_000091565.1	PRJNA224116	SAMEA3138297		representative genome	665029	552	Erwinia amylovora CFBP1430			latest	Complete Genome	Major	Full	2010-03-25	ASM9156v1	Bielefeld Univ	GCA_000091565.1	identical	ftp://ftp.ncbi.nlm.nih.gov/genomes/all/GCF/000/091/565/GCF_000091565.1_ASM9156v1
GCF_000091665.1	PRJNA224116	SAMN02603984		representative genome	243232	2190	Methanocaldococcus jannaschii DSM 2661	strain=DSM 2661		latest	Complete Genome	Major	Full	1999-12-22	ASM9166v1	TIGR	GCA_000091665.1	identical	ftp://ftp.ncbi.nlm.nih.gov/genomes/all/GCF/000/091/665/GCF_000091665.1_ASM9166v1		assembly from type material
GCF_000091785.1	PRJNA224116	SAMEA2272007		representative genome	661367	450	Legionella longbeachae NSW150	strain=NSW150		latest	Complete Genome	Major	Full	2010-02-13	ASM9178v1	Institut Pasteur - Unite de Biologie des Bacteries Intracellulaires	GCA_000091785.1	identical	ftp://ftp.ncbi.nlm.nih.gov/genomes/all/GCF/000/091/785/GCF_000091785.1_ASM9178v1
GCF_000091985.1	PRJNA224116	SAMEA2272735		representative genome	679897	217	Helicobacter mustelae 12198	strain=12198		latest	Complete Genome	Major	Full	2010-03-11	ASM9198v1	Wellcome Trust Sanger Institute	GCA_000091985.1	identical	ftp://ftp.ncbi.nlm.nih.gov/genomes/all/GCF/000/091/985/GCF_000091985.1_ASM9198v1
GCF_000092045.1	PRJNA224116	SAMN02603106		representative genome	347834	29449	Rhizobium etli CFN 42	strain=CFN 42		latest	Complete Genome	Major	Full	2006-03-06	ASM9204v1	Centro de Ciencias Genomicas, Universidad Nacional Autonoma de Mexico	GCA_000092045.1	identical	ftp://ftp.ncbi.nlm.nih.gov/genomes/all/GCF/000/092/045/GCF_000092045.1_ASM9204v1		assembly from type material
GCF_000092065.1	PRJNA19407	SAMN03081420		representative genome	436017	242159	Ostreococcus lucimarinus CCE9901	strain=CCE9901		latest	Complete Genome	Major	Full	2007-04-10	ASM9206v1	US DOE Joint Genome Institute	GCA_000092065.1	identical	ftp://ftp.ncbi.nlm.nih.gov/genomes/all/GCF/000/092/065/GCF_000092065.1_ASM9206v1
GCF_000092105.1	PRJNA224116	SAMN02598463		representative genome	521674	120	Planctopirus limnophila DSM 3776	strain=DSM 3776		latest	Complete Genome	Major	Full	2010-05-13	ASM9210v1	US DOE Joint Genome Institute (JGI-PGF)	GCA_000092105.1	identical	ftp://ftp.ncbi.nlm.nih.gov/genomes/all/GCF/000/092/105/GCF_000092105.1_ASM9210v1		assembly from type material
GCF_000092125.1	PRJNA224116	SAMN02598469		representative genome	526227	52022	Meiothermus silvanus DSM 9946	strain=DSM 9946		latest	Complete Genome	Major	Full	2010-05-26	ASM9212v1	US DOE Joint Genome Institute (JGI-PGF)	GCA_000092125.1	identical	ftp://ftp.ncbi.nlm.nih.gov/genomes/all/GCF/000/092/125/GCF_000092125.1_ASM9212v1		assembly from type material
GCF_000092205.1	PRJNA224116	SAMN02598502		representative genome	589865	427923	Desulfurivibrio alkaliphilus AHT 2	strain=AHT 2		latest	Complete Genome	Major	Full	2010-05-27	ASM9220v1	US DOE Joint Genome Institute (JGI-PGF)	GCA_000092205.1	identical	ftp://ftp.ncbi.nlm.nih.gov/genomes/all/GCF/000/092/205/GCF_000092205.1_ASM9220v1		assembly from type material
GCF_000092225.1	PRJNA224116	SAMN00002597		representative genome	521096	2061	Tsukamurella paurometabola DSM 20162	strain=DSM 20162		latest	Complete Genome	Major	Full	2010-05-13	ASM9222v1	US DOE Joint Genome Institute (JGI-PGF)	GCA_000092225.1	identical	ftp://ftp.ncbi.nlm.nih.gov/genomes/all/GCF/000/092/225/GCF_000092225.1_ASM9222v1		assembly from type material
GCF_000092245.1	PRJNA224116	SAMN02598489		representative genome	572480	28199	Arcobacter nitrofigilis DSM 7299	strain=DSM 7299		latest	Complete Genome	Major	Full	2010-05-17	ASM9224v1	US DOE Joint Genome Institute (JGI-PGF)	GCA_000092245.1	identical	ftp://ftp.ncbi.nlm.nih.gov/genomes/all/GCF/000/092/245/GCF_000092245.1_ASM9224v1		assembly from type material
GCF_000092265.1	PRJNA224116	SAMN02603777		representative genome	1236608	480	Moraxella catarrhalis BBH18	strain=BBH18		latest	Complete Genome	Major	Full	2010-05-11	ASM9226v1	Radboud University Nijmegen Medical Centre	GCA_000092265.1	identical	ftp://ftp.ncbi.nlm.nih.gov/genomes/all/GCF/000/092/265/GCF_000092265.1_ASM9226v1
GCF_000092285.1	PRJNA224116	SAMN02598513		representative genome	509190	88688	Caulobacter segnis ATCC 21756	strain=ATCC 21756		latest	Complete Genome	Major	Full	2010-04-30	ASM9228v1	US DOE Joint Genome Institute	GCA_000092285.1	identical	ftp://ftp.ncbi.nlm.nih.gov/genomes/all/GCF/000/092/285/GCF_000092285.1_ASM9228v1		assembly from type material
GCF_000092305.1	PRJNA224116	SAMN00017484		representative genome	573063	67760	Methanocaldococcus infernus ME	strain=ME		latest	Complete Genome	Major	Full	2010-04-30	ASM9230v1	US DOE Joint Genome Institute (JGI-PGF)	GCA_000092305.1	identical	ftp://ftp.ncbi.nlm.nih.gov/genomes/all/GCF/000/092/305/GCF_000092305.1_ASM9230v1		assembly from type material
GCF_000092365.1	PRJNA224116	SAMN02598519		representative genome	644284	28264	Arcanobacterium haemolyticum DSM 20595	strain=DSM 20595		latest	Complete Genome	Major	Full	2010-05-27	ASM9236v1	US DOE Joint Genome Institute (JGI-PGF)	GCA_000092365.1	identical	ftp://ftp.ncbi.nlm.nih.gov/genomes/all/GCF/000/092/365/GCF_000092365.1_ASM9236v1		assembly from type material
GCF_000092385.1	PRJNA224116	SAMN02603683		representative genome	749414	379067	Streptomyces bingchenggensis BCW-1	strain=BCW-1		latest	Complete Genome	Major	Full	2010-05-28	ASM9238v1	Northeast Agricultural University	GCA_000092385.1	identical	ftp://ftp.ncbi.nlm.nih.gov/genomes/all/GCF/000/092/385/GCF_000092385.1_ASM9238v1
GCF_000092405.1	PRJNA224116	SAMN02598518		representative genome	643648	86170	Syntrophothermus lipocalidus DSM 12680	strain=DSM 12680		latest	Complete Genome	Major	Full	2010-05-28	ASM9240v1	US DOE Joint Genome Institute (JGI-PGF)	GCA_000092405.1	identical	ftp://ftp.ncbi.nlm.nih.gov/genomes/all/GCF/000/092/405/GCF_000092405.1_ASM9240v1		assembly from type material
GCF_000092425.1	PRJNA224116	SAMN02598522		representative genome	649638	332249	Truepera radiovictrix DSM 17093	strain=DSM 17093		latest	Complete Genome	Major	Full	2010-05-28	ASM9242v1	US DOE Joint Genome Institute (JGI-PGF)	GCA_000092425.1	identical	ftp://ftp.ncbi.nlm.nih.gov/genomes/all/GCF/000/092/425/GCF_000092425.1_ASM9242v1		assembly from type material
GCF_000092505.1	PRJNA224116	SAMN02603394		representative genome	762051	136609	Leuconostoc kimchii IMSNU 11154	strain=IMSNU 11154		latest	Complete Genome	Major	Full	2010-05-06	ASM9250v1	Institute of Microbiology	GCA_000092505.1	identical	ftp://ftp.ncbi.nlm.nih.gov/genomes/all/GCF/000/092/505/GCF_000092505.1_ASM9250v1		assembly from type material
GCF_000092585.1	PRJNA224116	SAMN02604081		representative genome	710127	2096	Mycoplasma gallisepticum str. R(low)	strain=R		latest	Complete Genome	Major	Full	2010-01-28	ASM9258v1	Univ. Connecticut	GCA_000092585.1	identical	ftp://ftp.ncbi.nlm.nih.gov/genomes/all/GCF/000/092/585/GCF_000092585.1_ASM9258v1
GCF_000092645.1	PRJNA224116	SAMN00002587		representative genome	469371	2006	Thermobispora bispora DSM 43833	strain=DSM 43833		latest	Complete Genome	Major	Full	2010-05-17	ASM9264v1	US DOE Joint Genome Institute (JGI-PGF)	GCA_000092645.1	identical	ftp://ftp.ncbi.nlm.nih.gov/genomes/all/GCF/000/092/645/GCF_000092645.1_ASM9264v1		assembly from type material
GCF_000092785.1	PRJNA224116	SAMN02603402		representative genome	716544	71667	Waddlia chondrophila WSU 86-1044	strain=WSU 86-1044		latest	Complete Genome	Major	Full	2010-06-03	ASM9278v1	Institute of Microbiology, University Hospital Center and University of Lausanne, Switzerland	GCA_000092785.1	identical	ftp://ftp.ncbi.nlm.nih.gov/genomes/all/GCF/000/092/785/GCF_000092785.1_ASM9278v1		assembly from type material
GCF_000092825.1	PRJNA224116	SAMN02598516		representative genome	640132	286802	Segniliparus rotundus DSM 44985	strain=DSM 44985		latest	Complete Genome	Major	Full	2010-05-18	ASM9282v1	US DOE Joint Genome Institute (JGI-PGF)	GCA_000092825.1	identical	ftp://ftp.ncbi.nlm.nih.gov/genomes/all/GCF/000/092/825/GCF_000092825.1_ASM9282v1		assembly from type material
GCF_000092845.1	PRJNA224116	SAMN00001910		representative genome	526224	84378	Brachyspira murdochii DSM 12563	strain=DSM 12563		latest	Complete Genome	Major	Full	2010-05-13	ASM9284v1	US DOE Joint Genome Institute (JGI-PGF)	GCA_000092845.1	identical	ftp://ftp.ncbi.nlm.nih.gov/genomes/all/GCF/000/092/845/GCF_000092845.1_ASM9284v1		assembly from type material
GCF_000092865.1	PRJNA224116	SAMN02598424		representative genome	446466	1711	Cellulomonas flavigena DSM 20109	strain=DSM 20109		latest	Complete Genome	Major	Full	2010-05-13	ASM9286v1	US DOE Joint Genome Institute (JGI-PGF)	GCA_000092865.1	identical	ftp://ftp.ncbi.nlm.nih.gov/genomes/all/GCF/000/092/865/GCF_000092865.1_ASM9286v1		assembly from type material
GCF_000092905.1	PRJNA224116	SAMN00017498		representative genome	562970	33943	Kyrpidia tusciae DSM 2912	strain=DSM 2912		latest	Complete Genome	Major	Full	2010-04-29	ASM9290v1	US DOE Joint Genome Institute (JGI-PGF)	GCA_000092905.1	identical	ftp://ftp.ncbi.nlm.nih.gov/genomes/all/GCF/000/092/905/GCF_000092905.1_ASM9290v1		assembly from type material
GCF_000092925.1	PRJNA224116	SAMN02598514		representative genome	639283	921	Starkeya novella DSM 506	strain=DSM 506		latest	Complete Genome	Major	Full	2010-05-27	ASM9292v1	US DOE Joint Genome Institute	GCA_000092925.1	identical	ftp://ftp.ncbi.nlm.nih.gov/genomes/all/GCF/000/092/925/GCF_000092925.1_ASM9292v1		assembly from type material
GCF_000092985.1	PRJNA224116	SAMN02598425		representative genome	446468	2014	Nocardiopsis dassonvillei subsp. dassonvillei DSM 43111	strain=DSM 43111		latest	Complete Genome	Major	Full	2010-05-26	ASM9298v1	US DOE Joint Genome Institute (JGI-PGF)	GCA_000092985.1	identical	ftp://ftp.ncbi.nlm.nih.gov/genomes/all/GCF/000/092/985/GCF_000092985.1_ASM9298v1		assembly from type material
GCF_000093025.1	PRJNA224116	SAMN02598526		representative genome	666681	1055487	Methylotenera versatilis 301	strain=301		latest	Complete Genome	Major	Full	2010-06-01	ASM9302v1	US DOE Joint Genome Institute	GCA_000093025.1	identical	ftp://ftp.ncbi.nlm.nih.gov/genomes/all/GCF/000/093/025/GCF_000093025.1_ASM9302v1		assembly from type material
GCF_000093085.1	PRJNA224116	SAMN00000036		representative genome	439292	85683	[Bacillus] selenitireducens MLS10	strain=MLS10		latest	Complete Genome	Major	Full	2010-05-28	ASM9308v1	US DOE Joint Genome Institute (JGI-PGF)	GCA_000093085.1	identical	ftp://ftp.ncbi.nlm.nih.gov/genomes/all/GCF/000/093/085/GCF_000093085.1_ASM9308v1		assembly from type material
GCF_000143085.1	PRJNA224116	SAMN02598531		representative genome	105559	473531	Nitrosococcus watsonii C-113	strain=C-113		latest	Complete Genome	Major	Full	2010-06-25	ASM14308v1	US DOE Joint Genome Institute	GCA_000143085.1	identical	ftp://ftp.ncbi.nlm.nih.gov/genomes/all/GCF/000/143/085/GCF_000143085.1_ASM14308v1		assembly from type material
GCF_000143145.1	PRJNA224116	SAMN02598499		representative genome	582899	53399	Hyphomicrobium denitrificans ATCC 51888	strain=ATCC 51888		latest	Complete Genome	Major	Full	2010-06-25	ASM14314v1	US DOE Joint Genome Institute (JGI-PGF)	GCA_000143145.1	identical	ftp://ftp.ncbi.nlm.nih.gov/genomes/all/GCF/000/143/145/GCF_000143145.1_ASM14314v1		assembly from type material
GCF_000143165.1	PRJNA224116	SAMN02598529		representative genome	552811	552810	Dehalogenimonas lykanthroporepellens BL-DC-9	strain=BL-DC-9		latest	Complete Genome	Major	Full	2010-06-25	ASM14316v1	US DOE Joint Genome Institute (JGI-PGF)	GCA_000143165.1	identical	ftp://ftp.ncbi.nlm.nih.gov/genomes/all/GCF/000/143/165/GCF_000143165.1_ASM14316v1		assembly from type material
GCF_000143535.2	PRJNA20061	SAMN02953628		representative genome	332648	40559	Botrytis cinerea B05.10	strain=B05.10		latest	Complete Genome	Major	Full	2015-02-05	ASM14353v4	Syngenta Biotechnology, Inc.	GCA_000143535.4	identical	ftp://ftp.ncbi.nlm.nih.gov/genomes/all/GCF/000/143/535/GCF_000143535.2_ASM14353v4
GCF_000143845.1	PRJNA224116	SAMN00016989		representative genome	633147	133926	Olsenella uli DSM 7084	strain=DSM 7084		latest	Complete Genome	Major	Full	2010-07-26	ASM14384v1	US DOE Joint Genome Institute (JGI-PGF)	GCA_000143845.1	identical	ftp://ftp.ncbi.nlm.nih.gov/genomes/all/GCF/000/143/845/GCF_000143845.1_ASM14384v1		assembly from type material
GCF_000143965.1	PRJNA224116	SAMN02598521		representative genome	644282	453230	Desulfarculus baarsii DSM 2075	strain=DSM 2075		latest	Complete Genome	Major	Full	2010-07-29	ASM14396v1	US DOE Joint Genome Institute (JGI-PGF)	GCA_000143965.1	identical	ftp://ftp.ncbi.nlm.nih.gov/genomes/all/GCF/000/143/965/GCF_000143965.1_ASM14396v1		assembly from type material
GCF_000143985.1	PRJNA224116	SAMN00017394		representative genome	573413	55206	Sediminispirochaeta smaragdinae DSM 11293	strain=DSM 11293		latest	Complete Genome	Major	Full	2010-07-29	ASM14398v1	US DOE Joint Genome Institute (JGI-PGF)	GCA_000143985.1	identical	ftp://ftp.ncbi.nlm.nih.gov/genomes/all/GCF/000/143/985/GCF_000143985.1_ASM14398v1		assembly from type material
GCF_000144605.1	PRJNA224116	SAMN00007485		representative genome	633149	74313	Brevundimonas subvibrioides ATCC 15264	strain=ATCC 15264		latest	Complete Genome	Major	Full	2010-08-05	ASM14460v1	US DOE Joint Genome Institute	GCA_000144605.1	identical	ftp://ftp.ncbi.nlm.nih.gov/genomes/all/GCF/000/144/605/GCF_000144605.1_ASM14460v1		assembly from type material
GCF_000144625.1	PRJNA224116	SAMN00017134		representative genome	610130	84030	[Clostridium] saccharolyticum WM1	strain=WM1		latest	Complete Genome	Major	Full	2010-08-05	ASM14462v1	US DOE Joint Genome Institute	GCA_000144625.1	identical	ftp://ftp.ncbi.nlm.nih.gov/genomes/all/GCF/000/144/625/GCF_000144625.1_ASM14462v1		assembly from type material
GCF_000144645.1	PRJNA224116	SAMN00713558		representative genome	555079	291990	Thermosediminibacter oceani DSM 16646	strain=DSM 16646		latest	Complete Genome	Major	Full	2010-08-05	ASM14464v1	US DOE Joint Genome Institute (JGI-PGF)	GCA_000144645.1	identical	ftp://ftp.ncbi.nlm.nih.gov/genomes/all/GCF/000/144/645/GCF_000144645.1_ASM14464v1		assembly from type material
GCF_000144675.1	PRJNA224116	SAMN02604117		representative genome	681645	1719	Corynebacterium pseudotuberculosis C231	strain=C231		latest	Complete Genome	Major	Full	2010-08-05	ASM14467v1	University Federal of Minas Gerais	GCA_000144675.1	identical	ftp://ftp.ncbi.nlm.nih.gov/genomes/all/GCF/000/144/675/GCF_000144675.1_ASM14467v1
GCF_000144695.1	PRJNA224116	SAMN00016993		representative genome	574087	28187	Acetohalobium arabaticum DSM 5501	strain=DSM 5501		latest	Complete Genome	Major	Full	2010-08-05	ASM14469v1	US DOE Joint Genome Institute (JGI-PGF)	GCA_000144695.1	identical	ftp://ftp.ncbi.nlm.nih.gov/genomes/all/GCF/000/144/695/GCF_000144695.1_ASM14469v1		assembly from type material
GCF_000144915.1	PRJNA224116	SAMN02603091		representative genome	666510	242703	Acidilobus saccharovorans 345-15	strain=345-15		latest	Complete Genome	Major	Full	2010-08-06	ASM14491v1	Centre Bioengineering RAS	GCA_000144915.1	identical	ftp://ftp.ncbi.nlm.nih.gov/genomes/all/GCF/000/144/915/GCF_000144915.1_ASM14491v1		assembly from type material
GCF_000145035.1	PRJNA224116	SAMN02602973		representative genome	515622	43305	Butyrivibrio proteoclasticus B316	strain=B316		latest	Complete Genome	Major	Full	2010-08-10	ASM14503v1	AgResearch	GCA_000145035.1	identical	ftp://ftp.ncbi.nlm.nih.gov/genomes/all/GCF/000/145/035/GCF_000145035.1_ASM14503v1		assembly from type material
GCF_000145235.1	PRJNA224116	SAMN00006196		representative genome	644283	47850	Micromonospora aurantiaca ATCC 27029	strain=ATCC 27029		latest	Complete Genome	Major	Full	2010-08-11	ASM14523v1	US DOE Joint Genome Institute (JGI-PGF)	GCA_000145235.1	identical	ftp://ftp.ncbi.nlm.nih.gov/genomes/all/GCF/000/145/235/GCF_000145235.1_ASM14523v1		assembly from type material
GCF_000145255.1	PRJNA224116	SAMN00002572		representative genome	395494	370405	Gallionella capsiferriformans ES-2	strain=ES-2		latest	Complete Genome	Major	Full	2010-08-11	ASM14525v1	US DOE Joint Genome Institute (JGI-PGF)	GCA_000145255.1	identical	ftp://ftp.ncbi.nlm.nih.gov/genomes/all/GCF/000/145/255/GCF_000145255.1_ASM14525v1		assembly from type material
GCF_000145275.1	PRJNA224116	SAMN00002614		representative genome	573061	1493	Clostridium cellulovorans 743B	strain=743B		latest	Complete Genome	Major	Full	2010-08-11	ASM14527v1	US DOE Joint Genome Institute (JGI-PGF)	GCA_000145275.1	identical	ftp://ftp.ncbi.nlm.nih.gov/genomes/all/GCF/000/145/275/GCF_000145275.1_ASM14527v1		assembly from type material
GCF_000145295.1	PRJNA224116	SAMN02603260		representative genome	79929	145263	Methanothermobacter marburgensis str. Marburg	strain=Marburg		latest	Complete Genome	Major	Full	2010-08-11	ASM14529v1	Georg-August-University Goettingen	GCA_000145295.1	identical	ftp://ftp.ncbi.nlm.nih.gov/genomes/all/GCF/000/145/295/GCF_000145295.1_ASM14529v1		assembly from type material
GCF_000145615.1	PRJNA224116	SAMN00002542		representative genome	580327	1517	Thermoanaerobacterium thermosaccharolyticum DSM 571	strain=DSM 571		latest	Complete Genome	Major	Full	2010-08-13	ASM14561v1	US DOE Joint Genome Institute (JGI-PGF)	GCA_000145615.1	identical	ftp://ftp.ncbi.nlm.nih.gov/genomes/all/GCF/000/145/615/GCF_000145615.1_ASM14561v1		assembly from type material
GCF_000146025.2	PRJNA224116	SAMD00060933		representative genome	471821	167965	uncultured Termite group 1 bacterium phylotype Rs-D17			latest	Complete Genome	Major	Full	2008-03-18	ASM14602v1	RIKEN Genomic Sciences Center (GSC)	GCA_000146025.1	identical	ftp://ftp.ncbi.nlm.nih.gov/genomes/all/GCF/000/146/025/GCF_000146025.2_ASM14602v1	derived from environmental source
GCF_000146185.1	PRJNA224116	SAMN02603083		representative genome	515620	39485	[Eubacterium] eligens ATCC 27750	strain=ATCC 27750		latest	Complete Genome	Major	Full	2009-06-04	ASM14618v1	Center for Genome Sciences, Washington University School of Medicine	GCA_000146185.1	identical	ftp://ftp.ncbi.nlm.nih.gov/genomes/all/GCF/000/146/185/GCF_000146185.1_ASM14618v1		assembly from type material
GCF_000146505.1	PRJNA224116	SAMN02603971		representative genome	59374	833	Fibrobacter succinogenes subsp. succinogenes S85	strain=S85		latest	Complete Genome	Major	Full	2010-08-06	ASM14650v1	TIGR	GCA_000146505.1	identical	ftp://ftp.ncbi.nlm.nih.gov/genomes/all/GCF/000/146/505/GCF_000146505.1_ASM14650v1		assembly from type material
GCF_000147355.1	PRJNA224116	SAMN00713560		representative genome	563040	202747	Sulfurimonas autotrophica DSM 16294	strain=DSM 16294		latest	Complete Genome	Major	Full	2010-09-15	ASM14735v1	US DOE Joint Genome Institute (JGI-PGF)	GCA_000147355.1	identical	ftp://ftp.ncbi.nlm.nih.gov/genomes/all/GCF/000/147/355/GCF_000147355.1_ASM14735v1		assembly from type material
GCF_000147695.2	PRJNA224116	SAMN00016423		representative genome	697303	46354	Thermoanaerobacter wiegelii Rt8.B1	strain=Rt8.B1		latest	Complete Genome	Major	Full	2011-08-23	ASM14769v3	US DOE Joint Genome Institute (JGI-PGF)	GCA_000147695.3	identical	ftp://ftp.ncbi.nlm.nih.gov/genomes/all/GCF/000/147/695/GCF_000147695.2_ASM14769v3		assembly from type material
GCF_000147715.2	PRJNA224116	SAMN00025417		representative genome	660470	1184387	Mesotoga prima MesG1.Ag.4.2	strain=MesG1.Ag.4.2		latest	Complete Genome	Major	Full	2012-05-17	ASM14771v3	US DOE Joint Genome Institute (JGI-PGF)	GCA_000147715.3	identical	ftp://ftp.ncbi.nlm.nih.gov/genomes/all/GCF/000/147/715/GCF_000147715.2_ASM14771v3		assembly from type material
GCF_000147835.2	PRJNA224116	SAMN00016829		representative genome	690566	46429	Sphingobium chlorophenolicum L-1	strain=L-1		latest	Complete Genome	Major	Full	2011-05-26	ASM14783v3	US DOE Joint Genome Institute (JGI-PGF)	GCA_000147835.3	identical	ftp://ftp.ncbi.nlm.nih.gov/genomes/all/GCF/000/147/835/GCF_000147835.2_ASM14783v3
GCF_000147875.1	PRJNA224116	SAMN00017400		representative genome	679926	54120	Methanolacinia petrolearia DSM 11571			latest	Complete Genome	Major	Full	2010-09-17	ASM14787v1	US DOE Joint Genome Institute (JGI-PGF)	GCA_000147875.1	identical	ftp://ftp.ncbi.nlm.nih.gov/genomes/all/GCF/000/147/875/GCF_000147875.1_ASM14787v1		assembly from type material
GCF_000148645.1	PRJNA224116	SAMN00115627		representative genome	550540	44012	Ferrimonas balearica DSM 9799	strain=DSM 9799		latest	Complete Genome	Major	Full	2010-09-24	ASM14864v1	US DOE Joint Genome Institute (JGI-PGF)	GCA_000148645.1	identical	ftp://ftp.ncbi.nlm.nih.gov/genomes/all/GCF/000/148/645/GCF_000148645.1_ASM14864v1		assembly from type material
GCF_000151105.2	PRJNA224116	SAMN02603625		representative genome	391623	55802	Thermococcus barophilus MP	strain=MP		latest	Complete Genome	Major	Full	2010-12-17	ASM15110v2	Moore Foundation	GCA_000151105.2	identical	ftp://ftp.ncbi.nlm.nih.gov/genomes/all/GCF/000/151/105/GCF_000151105.2_ASM15110v2		assembly from type material
GCF_000152265.2	PRJNA224116	SAMN02604346		representative genome	333146	97393	Ferroplasma acidarmanus fer1	strain=fer1		latest	Complete Genome	Major	Full	2013-06-26	ASM15226v2	DOE Joint Genome Institute	GCA_000152265.2	identical	ftp://ftp.ncbi.nlm.nih.gov/genomes/all/GCF/000/152/265/GCF_000152265.2_ASM15226v2		assembly from type material
GCF_000152825.2	PRJNA224116	SAMN02603918		representative genome	314260	208216	Parvularcula bermudensis HTCC2503	strain=HTCC2503		latest	Complete Genome	Major	Full	2010-08-16	ASM15282v2	The Gordon and Betty Moore Foundation Marine Microbiology Initiative	GCA_000152825.2	identical	ftp://ftp.ncbi.nlm.nih.gov/genomes/all/GCF/000/152/825/GCF_000152825.2_ASM15282v2		assembly from type material
GCF_000153485.2	PRJNA224116	SAMN02603919		representative genome	313595	57029	Psychroflexus torquis ATCC 700755	strain=ATCC 700755		latest	Complete Genome	Major	Full	2012-10-09	ASM15348v2	The Gordon and Betty Moore Foundation Marine Microbiology Initiative	GCA_000153485.2	identical	ftp://ftp.ncbi.nlm.nih.gov/genomes/all/GCF/000/153/485/GCF_000153485.2_ASM15348v2		assembly from type material
GCF_000154785.2	PRJNA224116	SAMN02603624		representative genome	391595	42443	Roseobacter litoralis Och 149	strain=Och 149		latest	Complete Genome	Major	Full	2011-06-28	ASM15478v2	Moore Foundation	GCA_000154785.2	identical	ftp://ftp.ncbi.nlm.nih.gov/genomes/all/GCF/000/154/785/GCF_000154785.2_ASM15478v2		assembly from type material
GCF_000155735.2	PRJNA224116	SAMN02603620		representative genome	391616	53946	Octadecabacter arcticus 238	strain=238		latest	Complete Genome	Major	Full	2013-04-08	ASM15573v2	Moore Foundation	GCA_000155735.2	identical	ftp://ftp.ncbi.nlm.nih.gov/genomes/all/GCF/000/155/735/GCF_000155735.2_ASM15573v2		assembly from type material
GCF_000157355.2	PRJNA224116	SAMN02596921		representative genome	565655	37734	Enterococcus casseliflavus EC20	strain=EC20		latest	Complete Genome	Major	Full	2013-04-11	ASM15735v2	Broad Institute	GCA_000157355.2	identical	ftp://ftp.ncbi.nlm.nih.gov/genomes/all/GCF/000/157/355/GCF_000157355.2_ASM15735v2
GCF_000157895.3	PRJNA224116	SAMN02603596		representative genome	557599	1768	Mycobacterium kansasii ATCC 12478	strain=ATCC 12478		latest	Complete Genome	Major	Full	2013-11-01	ASM15789v2	McGill University	GCA_000157895.2	identical	ftp://ftp.ncbi.nlm.nih.gov/genomes/all/GCF/000/157/895/GCF_000157895.3_ASM15789v2		assembly from type material
GCF_000158275.2	PRJNA224116	SAMN02463711		representative genome	457405	851	Fusobacterium nucleatum subsp. animalis 7_1	strain=7_1		latest	Complete Genome	Major	Full	2014-02-03	ASM15827v2	Broad Institute	GCA_000158275.2	identical	ftp://ftp.ncbi.nlm.nih.gov/genomes/all/GCF/000/158/275/GCF_000158275.2_ASM15827v2
GCF_000163895.2	PRJNA224116	SAMN02463683		representative genome	546269	143361	Filifactor alocis ATCC 35896	strain=ATCC 35896		latest	Complete Genome	Major	Full	2011-01-27	ASM16389v2	Broad Institute	GCA_000163895.2	identical	ftp://ftp.ncbi.nlm.nih.gov/genomes/all/GCF/000/163/895/GCF_000163895.2_ASM16389v2		assembly from type material
GCF_000164675.2	PRJNA224116	SAMN00113608		representative genome	760570	1318	Streptococcus parasanguinis ATCC 15912	strain=ATCC 15912		latest	Complete Genome	Major	Full	2011-06-10	ASM16467v2	Baylor College of Medicine	GCA_000164675.2	identical	ftp://ftp.ncbi.nlm.nih.gov/genomes/all/GCF/000/164/675/GCF_000164675.2_ASM16467v2		assembly from type material
GCF_000164695.2	PRJNA224116	SAMN00120582		representative genome	762948	2047	Rothia dentocariosa ATCC 17931	strain=ATCC 17931		latest	Complete Genome	Major	Full	2010-11-03	ASM16469v2	Baylor College of Medicine	GCA_000164695.2	identical	ftp://ftp.ncbi.nlm.nih.gov/genomes/all/GCF/000/164/695/GCF_000164695.2_ASM16469v2		assembly from type material
GCF_000164865.1	PRJNA224116	SAMN00116754		representative genome	701347	1334193	[Enterobacter] lignolyticus SCF1	strain=SCF1		latest	Complete Genome	Major	Full	2010-10-15	ASM16486v1	US DOE Joint Genome Institute	GCA_000164865.1	identical	ftp://ftp.ncbi.nlm.nih.gov/genomes/all/GCF/000/164/865/GCF_000164865.1_ASM16486v1		assembly from type material
GCF_000164985.3	PRJNA224116	SAMN02603854		representative genome	886882	1406	Paenibacillus polymyxa SC2	strain=SC2		latest	Complete Genome	Minor	Full	2015-03-27	ASM16498v2	Shandong Agricultural University	GCA_000164985.2	identical	ftp://ftp.ncbi.nlm.nih.gov/genomes/all/GCF/000/164/985/GCF_000164985.3_ASM16498v2
GCF_000165465.1	PRJNA224116	SAMN00103629		representative genome	572479	2331	Halanaerobium praevalens DSM 2228	strain=DSM 2228		latest	Complete Genome	Major	Full	2010-10-21	ASM16546v1	DOE Joint Genome Institute	GCA_000165465.1	identical	ftp://ftp.ncbi.nlm.nih.gov/genomes/all/GCF/000/165/465/GCF_000165465.1_ASM16546v1		assembly from type material
GCF_000165485.1	PRJNA224116	SAMN02603592		representative genome	378806	41	Stigmatella aurantiaca DW4/3-1	strain=DW4/3-1		latest	Complete Genome	Major	Full	2010-10-21	ASM16548v1	Max Planck Institute for Terrestrial Microbiology	GCA_000165485.1	identical	ftp://ftp.ncbi.nlm.nih.gov/genomes/all/GCF/000/165/485/GCF_000165485.1_ASM16548v1
GCF_000165505.1	PRJNA224116	SAMN00116458		representative genome	572544	167642	Ilyobacter polytropus DSM 2926	strain=DSM 2926		latest	Complete Genome	Major	Full	2010-10-22	ASM16550v1	US DOE Joint Genome Institute (JGI-PGF)	GCA_000165505.1	identical	ftp://ftp.ncbi.nlm.nih.gov/genomes/all/GCF/000/165/505/GCF_000165505.1_ASM16550v1		assembly from type material
GCF_000165715.2	PRJNA224116	SAMN00103628		representative genome	756272	119	Rubinisphaera brasiliensis DSM 5305	strain=DSM 5305		latest	Complete Genome	Major	Full	2011-03-01	ASM16571v3	US DOE Joint Genome Institute (JGI-PGF)	GCA_000165715.3	identical	ftp://ftp.ncbi.nlm.nih.gov/genomes/all/GCF/000/165/715/GCF_000165715.2_ASM16571v3		assembly from type material
GCF_000166055.1	PRJNA224116	SAMN00007427		representative genome	648757	1069	Rhodomicrobium vannielii ATCC 17100	strain=ATCC 17100		latest	Complete Genome	Major	Full	2010-11-05	ASM16605v1	US DOE Joint Genome Institute (JGI-PGF)	GCA_000166055.1	identical	ftp://ftp.ncbi.nlm.nih.gov/genomes/all/GCF/000/166/055/GCF_000166055.1_ASM16605v1		assembly from type material
GCF_000166095.1	PRJNA224116	SAMN02232040		representative genome	523846	2180	Methanothermus fervidus DSM 2088	strain=DSM 2088		latest	Complete Genome	Major	Full	2010-11-05	ASM16609v1	US DOE Joint Genome Institute (JGI-PGF)	GCA_000166095.1	identical	ftp://ftp.ncbi.nlm.nih.gov/genomes/all/GCF/000/166/095/GCF_000166095.1_ASM16609v1		assembly from type material
GCF_000166135.1	PRJNA224116	SAMN02232023		representative genome	298654	298654	Frankia inefficax	strain=EuI1c		latest	Complete Genome	Major	Full	2010-11-05	ASM16613v1	US DOE Joint Genome Institute (JGI-PGF)	GCA_000166135.1	identical	ftp://ftp.ncbi.nlm.nih.gov/genomes/all/GCF/000/166/135/GCF_000166135.1_ASM16613v1		assembly from type material
GCF_000166395.1	PRJNA224116	SAMN00191237		representative genome	649349	316068	Leadbetterella byssophila DSM 17132	strain=DSM 17132		latest	Complete Genome	Major	Full	2010-11-12	ASM16639v1	US DOE Joint Genome Institute (JGI-PGF)	GCA_000166395.1	identical	ftp://ftp.ncbi.nlm.nih.gov/genomes/all/GCF/000/166/395/GCF_000166395.1_ASM16639v1		assembly from type material
GCF_000166415.1	PRJNA224116	SAMN02232026		representative genome	656519	656519	Halanaerobium hydrogeniformans			latest	Complete Genome	Major	Full	2010-11-12	ASM16641v1	US DOE Joint Genome Institute	GCA_000166415.1	identical	ftp://ftp.ncbi.nlm.nih.gov/genomes/all/GCF/000/166/415/GCF_000166415.1_ASM16641v1
GCF_000172635.2	PRJNA224116	SAMN02603229		representative genome	529120	28108	Alteromonas macleodii ATCC 27126	strain=ATCC 27126		latest	Complete Genome	Major	Full	2012-09-21	ASM17263v2	Evolucinary Genomics Group, Universidad Miguel Hernandez	GCA_000172635.2	identical	ftp://ftp.ncbi.nlm.nih.gov/genomes/all/GCF/000/172/635/GCF_000172635.2_ASM17263v2		assembly from type material
GCF_000172995.2	PRJNA224116	SAMN00002580		representative genome	469382	60847	Halogeometricum borinquense DSM 11551	strain=PR 3		latest	Complete Genome	Major	Full	2010-11-22	ASM17299v2	US DOE Joint Genome Institute (JGI-PGF)	GCA_000172995.2	identical	ftp://ftp.ncbi.nlm.nih.gov/genomes/all/GCF/000/172/995/GCF_000172995.2_ASM17299v2		assembly from type material
GCF_000175215.2	PRJNA224116	SAMN00002561		representative genome	573065	78587	Asticcacaulis excentricus CB 48	strain=CB 48		latest	Complete Genome	Major	Full	2010-12-22	ASM17521v2	US DOE Joint Genome Institute (JGI-PGF)	GCA_000175215.2	identical	ftp://ftp.ncbi.nlm.nih.gov/genomes/all/GCF/000/175/215/GCF_000175215.2_ASM17521v2		assembly from type material
GCF_000175255.2	PRJNA224116	SAMN02232066		representative genome	555217	542	Zymomonas mobilis subsp. mobilis ATCC 10988	strain=ATCC 10988		latest	Complete Genome	Major	Full	2011-06-13	ASM17525v2	US DOE Joint Genome Institute (JGI-PGF)	GCA_000175255.2	identical	ftp://ftp.ncbi.nlm.nih.gov/genomes/all/GCF/000/175/255/GCF_000175255.2_ASM17525v2		assembly from type material
GCF_000175575.2	PRJNA224116	SAMN02469802		representative genome	637389	33059	Acidithiobacillus caldus ATCC 51756	strain=ATCC 51756		latest	Complete Genome	Major	Full	2014-05-27	ASM17557v2	Center for Bioinformatics and Genome Biology	GCA_000175575.2	identical	ftp://ftp.ncbi.nlm.nih.gov/genomes/all/GCF/000/175/575/GCF_000175575.2_ASM17557v2		assembly from type material
GCF_000176855.2	PRJNA224116	SAMN00006197		representative genome	643561	80867	Acidovorax avenae subsp. avenae ATCC 19860	strain=ATCC 19860		latest	Complete Genome	Major	Full	2011-02-14	ASM17685v2	US DOE Joint Genome Institute (JGI-PGF)	GCA_000176855.2	identical	ftp://ftp.ncbi.nlm.nih.gov/genomes/all/GCF/000/176/855/GCF_000176855.2_ASM17685v2		assembly from synonym type material
GCF_000176915.2	PRJNA224116	SAMN00713573		representative genome	643562	182210	Pseudodesulfovibrio aespoeensis Aspo-2	strain=Aspo-2		latest	Complete Genome	Major	Full	2011-01-04	ASM17691v2	US DOE Joint Genome Institute (JGI-PGF)	GCA_000176915.2	identical	ftp://ftp.ncbi.nlm.nih.gov/genomes/all/GCF/000/176/915/GCF_000176915.2_ASM17691v2		assembly from type material
GCF_000177235.2	PRJNA224116	SAMN00007429		representative genome	649639	1413	Bacillus cellulosilyticus DSM 2522	strain=DSM 2522		latest	Complete Genome	Major	Full	2010-12-27	ASM17723v2	US DOE Joint Genome Institute (JGI-PGF)	GCA_000177235.2	identical	ftp://ftp.ncbi.nlm.nih.gov/genomes/all/GCF/000/177/235/GCF_000177235.2_ASM17723v2		assembly from type material
GCF_000177535.2	PRJNA224116	SAMN02603065		representative genome	662755	258224	Corynebacterium resistens DSM 45100	strain=DSM 45100		latest	Complete Genome	Major	Full	2011-06-15	ASM17753v2	Center for Biotechnology, Bielefeld University	GCA_000177535.2	identical	ftp://ftp.ncbi.nlm.nih.gov/genomes/all/GCF/000/177/535/GCF_000177535.2_ASM17753v2		assembly from type material
GCF_000177615.2	PRJNA224116	SAMN00713636		representative genome	656024	656024	Frankia symbiont of Datisca glomerata	strain=4085684		latest	Complete Genome	Major	Full	2011-06-06	ASM17761v2	US DOE Joint Genome Institute (JGI-PGF)	GCA_000177615.2	identical	ftp://ftp.ncbi.nlm.nih.gov/genomes/all/GCF/000/177/615/GCF_000177615.2_ASM17761v2
GCF_000177635.2	PRJNA224116	SAMN02232016		representative genome	653733	936456	Desulfurispirillum indicum S5	strain=S5		latest	Complete Genome	Major	Full	2011-01-04	ASM17763v2	US DOE Joint Genome Institute (JGI-PGF)	GCA_000177635.2	identical	ftp://ftp.ncbi.nlm.nih.gov/genomes/all/GCF/000/177/635/GCF_000177635.2_ASM17763v2		assembly from type material
GCF_000178115.2	PRJNA224116	SAMN00008641		representative genome	663278	253239	Ethanoligenens harbinense YUAN-3	strain=YUAN-3		latest	Complete Genome	Major	Full	2010-12-27	ASM17811v2	US DOE Joint Genome Institute (JGI-PGF)	GCA_000178115.2	identical	ftp://ftp.ncbi.nlm.nih.gov/genomes/all/GCF/000/178/115/GCF_000178115.2_ASM17811v2		assembly from type material
GCF_000178835.2	PRJNA224116	SAMN00013959		representative genome	642492	29360	Cellulosilyticum lentocellum DSM 5427	strain=DSM 5427		latest	Complete Genome	Major	Full	2011-03-22	ASM17883v2	US DOE Joint Genome Institute (JGI-PGF)	GCA_000178835.2	identical	ftp://ftp.ncbi.nlm.nih.gov/genomes/all/GCF/000/178/835/GCF_000178835.2_ASM17883v2		assembly from type material
GCF_000178875.2	PRJNA224116	SAMN00016780		representative genome	693973	62322	Shewanella baltica OS678	strain=OS678		latest	Complete Genome	Major	Full	2010-12-21	ASM17887v2	US DOE Joint Genome Institute (JGI-PGF)	GCA_000178875.2	identical	ftp://ftp.ncbi.nlm.nih.gov/genomes/all/GCF/000/178/875/GCF_000178875.2_ASM17887v2
GCF_000178955.2	PRJNA224116	SAMN02232025		representative genome	682795	940614	Granulicella mallensis MP5ACTX8	strain=MP5ACTX8		latest	Complete Genome	Major	Full	2011-12-01	ASM17895v2	US DOE Joint Genome Institute (JGI-PGF)	GCA_000178955.2	identical	ftp://ftp.ncbi.nlm.nih.gov/genomes/all/GCF/000/178/955/GCF_000178955.2_ASM17895v2		assembly from type material
GCF_000178975.2	PRJNA224116	SAMN00013395		representative genome	1198114	940615	Granulicella tundricola MP5ACTX9	strain=MP5ACTX9		latest	Complete Genome	Major	Full	2011-02-02	ASM17897v2	US DOE Joint Genome Institute (JGI-PGF)	GCA_000178975.2	identical	ftp://ftp.ncbi.nlm.nih.gov/genomes/all/GCF/000/178/975/GCF_000178975.2_ASM17897v2		assembly from type material
GCF_000179035.2	PRJNA224116	SAMN02603730		representative genome	768700	57372	Mycoplasma suis str. Illinois	strain=Illinois		latest	Complete Genome	Major	Full	2011-02-18	ASM17903v2	Purdue University	GCA_000179035.2	identical	ftp://ftp.ncbi.nlm.nih.gov/genomes/all/GCF/000/179/035/GCF_000179035.2_ASM17903v2		assembly designated as reftype
GCF_000179395.2	PRJNA224116	SAMN02603088		representative genome	858619	1727	Corynebacterium variabile DSM 44702	strain=DSM 44702		latest	Complete Genome	Major	Full	2011-07-19	ASM17939v2	Center of Biotechnology, Bielefeld University	GCA_000179395.2	identical	ftp://ftp.ncbi.nlm.nih.gov/genomes/all/GCF/000/179/395/GCF_000179395.2_ASM17939v2
GCF_000179575.2	PRJNA224116	SAMN00100784		representative genome	647113	155863	Methanothermococcus okinawensis IH1	strain=IH1		latest	Complete Genome	Major	Full	2011-06-06	ASM17957v2	US DOE Joint Genome Institute (JGI-PGF)	GCA_000179575.2	identical	ftp://ftp.ncbi.nlm.nih.gov/genomes/all/GCF/000/179/575/GCF_000179575.2_ASM17957v2		assembly from type material
GCF_000179635.2	PRJNA224116	SAMN00016988		representative genome	697329	1264	Ruminococcus albus 7 = DSM 20455	strain=7		latest	Complete Genome	Major	Full	2010-12-23	ASM17963v2	US DOE Joint Genome Institute (JGI-PGF)	GCA_000179635.2	identical	ftp://ftp.ncbi.nlm.nih.gov/genomes/all/GCF/000/179/635/GCF_000179635.2_ASM17963v2		assembly from type material
GCF_000179915.2	PRJNA224116	SAMN00100755		representative genome	401053	870903	Terriglobus saanensis SP1PR4	strain=SP1PR4		latest	Complete Genome	Major	Full	2011-01-24	ASM17991v2	US DOE Joint Genome Institute (JGI-PGF)	GCA_000179915.2	identical	ftp://ftp.ncbi.nlm.nih.gov/genomes/all/GCF/000/179/915/GCF_000179915.2_ASM17991v2		assembly from type material
GCF_000180175.2	PRJNA224116	SAMD00013603		representative genome	891974	891974	Plautia stali symbiont			latest	Complete Genome	Major	Full	2013-10-04	ASM18017v2	School of Pharmacy, Nihon University	GCA_000180175.2	identical	ftp://ftp.ncbi.nlm.nih.gov/genomes/all/GCF/000/180/175/GCF_000180175.2_ASM18017v2
GCF_000182745.2	PRJNA224116	SAMD00060987		representative genome	634177	1177712	Komagataeibacter medellinensis NBRC 3288	strain=NBRC 3288		latest	Complete Genome	Major	Full	2011-09-25	ASM18274v1	National Institute of Technology and Evaluation	GCA_000182745.1	identical	ftp://ftp.ncbi.nlm.nih.gov/genomes/all/GCF/000/182/745/GCF_000182745.2_ASM18274v1		assembly from type material
GCF_000183135.1	PRJNA224116	SAMN00016731		representative genome	694427	185300	Paludibacter propionicigenes WB4	strain=WB4		latest	Complete Genome	Major	Full	2010-11-23	ASM18313v1	US DOE Joint Genome Institute (JGI-PGF)	GCA_000183135.1	identical	ftp://ftp.ncbi.nlm.nih.gov/genomes/all/GCF/000/183/135/GCF_000183135.1_ASM18313v1		assembly from type material
GCF_000183385.1	PRJNA224116	SAMN02604028		representative genome	289397	28903	Mycoplasma bovis PG45	strain=PG45		latest	Complete Genome	Major	Full	2010-11-30	ASM18338v1	TIGR	GCA_000183385.1	identical	ftp://ftp.ncbi.nlm.nih.gov/genomes/all/GCF/000/183/385/GCF_000183385.1_ASM18338v1		assembly from type material
GCF_000183405.1	PRJNA224116	SAMN00102793		representative genome	768670	477976	Calditerrivibrio nitroreducens DSM 19672	strain=DSM 19672		latest	Complete Genome	Major	Full	2010-11-30	ASM18340v1	US DOE Joint Genome Institute (JGI-PGF)	GCA_000183405.1	identical	ftp://ftp.ncbi.nlm.nih.gov/genomes/all/GCF/000/183/405/GCF_000183405.1_ASM18340v1		assembly from type material
GCF_000183425.1	PRJNA224116	SAMN00138949		representative genome	643867	1006	Marivirga tractuosa DSM 4126	strain=DSM 4126		latest	Complete Genome	Major	Full	2010-11-30	ASM18342v1	US DOE Joint Genome Institute (JGI-PGF)	GCA_000183425.1	identical	ftp://ftp.ncbi.nlm.nih.gov/genomes/all/GCF/000/183/425/GCF_000183425.1_ASM18342v1		assembly from type material
GCF_000183725.1	PRJNA224116	SAMN00713566		representative genome	709032	148813	Sulfuricurvum kujiense DSM 16994	strain=DSM 16994		latest	Complete Genome	Major	Full	2010-12-02	ASM18372v1	US DOE Joint Genome Institute (JGI-PGF)	GCA_000183725.1	identical	ftp://ftp.ncbi.nlm.nih.gov/genomes/all/GCF/000/183/725/GCF_000183725.1_ASM18372v1		assembly from type material
GCF_000183745.1	PRJNA224116	SAMN00138957		representative genome	670487	187137	Oceanithermus profundus DSM 14977	strain=DSM 14977		latest	Complete Genome	Major	Full	2010-12-02	ASM18374v1	US DOE Joint Genome Institute (JGI-PGF)	GCA_000183745.1	identical	ftp://ftp.ncbi.nlm.nih.gov/genomes/all/GCF/000/183/745/GCF_000183745.1_ASM18374v1		assembly from type material
GCF_000184345.1	PRJNA224116	SAMN00191235		representative genome	869211	154	Spirochaeta thermophila DSM 6578	strain=DSM 6578		latest	Complete Genome	Major	Full	2011-07-06	ASM18434v2	US DOE Joint Genome Institute (JGI-PGF)	GCA_000184345.2	identical	ftp://ftp.ncbi.nlm.nih.gov/genomes/all/GCF/000/184/345/GCF_000184345.1_ASM18434v2		assembly from type material
GCF_000184435.1	PRJNA224116	SAMN00713568		representative genome	278137	1804	Mycolicibacterium gilvum Spyr1	strain=Spyr1		latest	Complete Genome	Major	Full	2010-12-21	ASM18443v1	US DOE Joint Genome Institute	GCA_000184435.1	identical	ftp://ftp.ncbi.nlm.nih.gov/genomes/all/GCF/000/184/435/GCF_000184435.1_ASM18443v1
GCF_000184685.1	PRJNA224116	SAMN00713569		representative genome	710696	53358	Intrasporangium calvum DSM 43043	strain=DSM 43043		latest	Complete Genome	Major	Full	2010-12-29	ASM18468v1	US DOE Joint Genome Institute (JGI-PGF)	GCA_000184685.1	identical	ftp://ftp.ncbi.nlm.nih.gov/genomes/all/GCF/000/184/685/GCF_000184685.1_ASM18468v1		assembly from type material
GCF_000184705.1	PRJNA224116	SAMN00713570		representative genome	644966	73919	Thermaerobacter marianensis DSM 12885	strain=DSM 12885		latest	Complete Genome	Major	Full	2010-12-29	ASM18470v1	US DOE Joint Genome Institute (JGI-PGF)	GCA_000184705.1	identical	ftp://ftp.ncbi.nlm.nih.gov/genomes/all/GCF/000/184/705/GCF_000184705.1_ASM18470v1		assembly from type material
GCF_000184745.1	PRJNA224116	SAMN00149467		representative genome	595537	34073	Variovorax paradoxus EPS	strain=EPS		latest	Complete Genome	Major	Full	2010-12-29	ASM18474v1	US DOE Joint Genome Institute	GCA_000184745.1	identical	ftp://ftp.ncbi.nlm.nih.gov/genomes/all/GCF/000/184/745/GCF_000184745.1_ASM18474v1
GCF_000185805.1	PRJNA224116	SAMN00713575		representative genome	648996	228745	Thermovibrio ammonificans HB-1	strain=HB-1		latest	Complete Genome	Major	Full	2011-01-07	ASM18580v1	US DOE Joint Genome Institute	GCA_000185805.1	identical	ftp://ftp.ncbi.nlm.nih.gov/genomes/all/GCF/000/185/805/GCF_000185805.1_ASM18580v1		assembly from type material
GCF_000185885.1	PRJNA224116	SAMN02603958		representative genome	937773	283734	Staphylococcus pseudintermedius HKU10-03	strain=HKU10-03		latest	Complete Genome	Major	Full	2011-01-07	ASM18588v1	The University of Hong Kong	GCA_000185885.1	identical	ftp://ftp.ncbi.nlm.nih.gov/genomes/all/GCF/000/185/885/GCF_000185885.1_ASM18588v1
GCF_000185965.1	PRJNA224116	SAMN00713577		representative genome	743721	314722	Pseudoxanthomonas suwonensis 11-1	strain=11-1		latest	Complete Genome	Major	Full	2011-01-12	ASM18596v1	US DOE Joint Genome Institute	GCA_000185965.1	identical	ftp://ftp.ncbi.nlm.nih.gov/genomes/all/GCF/000/185/965/GCF_000185965.1_ASM18596v1
GCF_000186005.1	PRJNA224116	SAMN02604339		representative genome	943945	2115	Mycoplasma fermentans M64	strain=M64		latest	Complete Genome	Major	Full	2011-01-13	ASM18600v1	Yang-Ming University	GCA_000186005.1	identical	ftp://ftp.ncbi.nlm.nih.gov/genomes/all/GCF/000/186/005/GCF_000186005.1_ASM18600v1
GCF_000186245.1	PRJNA224116	SAMN00713578		representative genome	749222	269261	Nitratifractor salsuginis DSM 16511	strain=DSM 16511		latest	Complete Genome	Major	Full	2011-01-18	ASM18624v1	US DOE Joint Genome Institute (JGI-PGF)	GCA_000186245.1	identical	ftp://ftp.ncbi.nlm.nih.gov/genomes/all/GCF/000/186/245/GCF_000186245.1_ASM18624v1		assembly from type material
GCF_000186265.1	PRJNA224116	SAMN00190054		representative genome	688270	59600	Cellulophaga algicola DSM 14237	strain=DSM 14237		latest	Complete Genome	Major	Full	2011-01-18	ASM18626v1	US DOE Joint Genome Institute (JGI-PGF)	GCA_000186265.1	identical	ftp://ftp.ncbi.nlm.nih.gov/genomes/all/GCF/000/186/265/GCF_000186265.1_ASM18626v1		assembly from type material
GCF_000186345.1	PRJNA224116	SAMN00138929		representative genome	575540	128	Isosphaera pallida ATCC 43644	strain=ATCC 43644		latest	Complete Genome	Major	Full	2011-01-20	ASM18634v1	US DOE Joint Genome Institute (JGI-PGF)	GCA_000186345.1	identical	ftp://ftp.ncbi.nlm.nih.gov/genomes/all/GCF/000/186/345/GCF_000186345.1_ASM18634v1		assembly from type material
GCF_000186365.1	PRJNA224116	SAMN00103627		representative genome	765177	2275	Desulfurococcus mucosus DSM 2162	strain=DSM 2162		latest	Complete Genome	Major	Full	2011-01-20	ASM18636v1	US DOE Joint Genome Institute (JGI-PGF)	GCA_000186365.1	identical	ftp://ftp.ncbi.nlm.nih.gov/genomes/all/GCF/000/186/365/GCF_000186365.1_ASM18636v1		assembly from type material
GCF_000186385.1	PRJNA224116	SAMN00713579		representative genome	709986	309887	Deinococcus maricopensis DSM 21211	strain=DSM 21211		latest	Complete Genome	Major	Full	2011-01-20	ASM18638v1	US DOE Joint Genome Institute (JGI-PGF)	GCA_000186385.1	identical	ftp://ftp.ncbi.nlm.nih.gov/genomes/all/GCF/000/186/385/GCF_000186385.1_ASM18638v1		assembly from type material
GCF_000187005.1	PRJNA224116	SAMN02603261		representative genome	743525	37636	Thermus scotoductus SA-01	strain=SA-01		latest	Complete Genome	Major	Full	2011-01-27	ASM18700v1	Georg-August-University Goettingen	GCA_000187005.1	identical	ftp://ftp.ncbi.nlm.nih.gov/genomes/all/GCF/000/187/005/GCF_000187005.1_ASM18700v1
GCF_000189295.2	PRJNA224116	SAMN02232015		representative genome	641491	876	Desulfovibrio desulfuricans ND132	strain=ND132		latest	Complete Genome	Major	Full	2011-12-29	ASM18929v2	US DOE Joint Genome Institute	GCA_000189295.2	identical	ftp://ftp.ncbi.nlm.nih.gov/genomes/all/GCF/000/189/295/GCF_000189295.2_ASM18929v2
GCF_000189415.1	PRJNA224116	SAMN00713585		representative genome	865938	1014	Weeksella virosa DSM 16922	strain=DSM 16922		latest	Complete Genome	Major	Full	2011-02-15	ASM18941v1	JGI	GCA_000189415.1	identical	ftp://ftp.ncbi.nlm.nih.gov/genomes/all/GCF/000/189/415/GCF_000189415.1_ASM18941v1		assembly from type material
GCF_000189535.1	PRJNA224116	SAMN00710681		representative genome	930171	361575	Pseudarthrobacter phenanthrenivorans Sphe3	strain=Sphe3		latest	Complete Genome	Major	Full	2011-02-16	ASM18953v1	US DOE Joint Genome Institute	GCA_000189535.1	identical	ftp://ftp.ncbi.nlm.nih.gov/genomes/all/GCF/000/189/535/GCF_000189535.1_ASM18953v1		assembly from type material
GCF_000189775.2	PRJNA224116	SAMN00204087		representative genome	858215	29329	Thermoanaerobacterium xylanolyticum LX-11	strain=LX-11		latest	Complete Genome	Major	Full	2011-05-17	ASM18977v3	US DOE Joint Genome Institute (JGI-PGF)	GCA_000189775.3	identical	ftp://ftp.ncbi.nlm.nih.gov/genomes/all/GCF/000/189/775/GCF_000189775.2_ASM18977v3		assembly from type material
GCF_000190315.1	PRJNA224116	SAMN02603092		representative genome	985053	985052	Vulcanisaeta moutnovskia 768-28	strain=768-28		latest	Complete Genome	Major	Full	2011-02-22	ASM19031v1	Centre Bioengineering RAS	GCA_000190315.1	identical	ftp://ftp.ncbi.nlm.nih.gov/genomes/all/GCF/000/190/315/GCF_000190315.1_ASM19031v1
GCF_000190435.1	PRJNA224116	SAMN00713587		representative genome	158189	1131703	Sphaerochaeta globosa str. Buddy	strain=Buddy		latest	Complete Genome	Major	Full	2011-02-24	ASM19043v1	US DOE Joint Genome Institute	GCA_000190435.1	identical	ftp://ftp.ncbi.nlm.nih.gov/genomes/all/GCF/000/190/435/GCF_000190435.1_ASM19043v1		assembly from type material
GCF_000190535.1	PRJNA224116	SAMN00713588		representative genome	709991	28118	Odoribacter splanchnicus DSM 20712	strain=DSM 220712		latest	Complete Genome	Major	Full	2011-02-28	ASM19053v1	US DOE Joint Genome Institute (JGI-PGF)	GCA_000190535.1	identical	ftp://ftp.ncbi.nlm.nih.gov/genomes/all/GCF/000/190/535/GCF_000190535.1_ASM19053v1		assembly from type material
GCF_000190555.1	PRJNA224116	SAMN00016729		representative genome	693977	55148	Deinococcus proteolyticus MRP	strain=MRP		latest	Complete Genome	Major	Full	2011-02-28	ASM19055v1	US DOE Joint Genome Institute (JGI-PGF)	GCA_000190555.1	identical	ftp://ftp.ncbi.nlm.nih.gov/genomes/all/GCF/000/190/555/GCF_000190555.1_ASM19055v1		assembly from type material
GCF_000190575.1	PRJNA224116	SAMN00713589		representative genome	667015	376805	Bacteroides salanitronis DSM 18170	strain=DSM 18170		latest	Complete Genome	Major	Full	2011-02-28	ASM19057v1	US DOE Joint Genome Institute (JGI-PGF)	GCA_000190575.1	identical	ftp://ftp.ncbi.nlm.nih.gov/genomes/all/GCF/000/190/575/GCF_000190575.1_ASM19057v1		assembly from type material
GCF_000190595.1	PRJNA224116	SAMN00713590		representative genome	867900	979	Cellulophaga lytica DSM 7489	strain=DSM 7489		latest	Complete Genome	Major	Full	2011-02-28	ASM19059v1	US DOE Joint Genome Institute (JGI-PGF)	GCA_000190595.1	identical	ftp://ftp.ncbi.nlm.nih.gov/genomes/all/GCF/000/190/595/GCF_000190595.1_ASM19059v1		assembly from type material
GCF_000190635.1	PRJNA224116	SAMN00216969		representative genome	645991	51197	Syntrophobotulus glycolicus DSM 8271	strain=DSM 8271		latest	Complete Genome	Major	Full	2011-03-01	ASM19063v1	US DOE Joint Genome Institute (JGI-PGF)	GCA_000190635.1	identical	ftp://ftp.ncbi.nlm.nih.gov/genomes/all/GCF/000/190/635/GCF_000190635.1_ASM19063v1		assembly from type material
GCF_000190735.1	PRJNA224116	SAMN00103626		representative genome	762903	151895	Pseudopedobacter saltans DSM 12145	strain=DSM 12145		latest	Complete Genome	Major	Full	2011-03-01	ASM19073v2	US DOE Joint Genome Institute (JGI-PGF)	GCA_000190735.2	identical	ftp://ftp.ncbi.nlm.nih.gov/genomes/all/GCF/000/190/735/GCF_000190735.1_ASM19073v2		assembly from type material
GCF_000191045.1	PRJNA224116	SAMN00713591		representative genome	868864	64160	Desulfurobacterium thermolithotrophum DSM 11699	strain=DSM 11699		latest	Complete Genome	Major	Full	2011-03-02	ASM19104v1	US DOE Joint Genome Institute (JGI-PGF)	GCA_000191045.1	identical	ftp://ftp.ncbi.nlm.nih.gov/genomes/all/GCF/000/191/045/GCF_000191045.1_ASM19104v1		assembly from type material
GCF_000191545.1	PRJNA224116	SAMN02603487		representative genome	1604	1604	Lactobacillus amylovorus	strain=30SC		latest	Complete Genome	Major	Full	2011-03-07	ASM19154v1	Korea University	GCA_000191545.1	identical	ftp://ftp.ncbi.nlm.nih.gov/genomes/all/GCF/000/191/545/GCF_000191545.1_ASM19154v1
GCF_000191585.1	PRJNA224116	SAMN02232037		representative genome	877455	877455	Methanobacterium lacus	strain=AL-21		latest	Complete Genome	Major	Full	2011-03-07	ASM19158v1	US DOE Joint Genome Institute	GCA_000191585.1	identical	ftp://ftp.ncbi.nlm.nih.gov/genomes/all/GCF/000/191/585/GCF_000191585.1_ASM19158v1
GCF_000192745.1	PRJNA224116	SAMN02603150		representative genome	991905	991904	Polymorphum gilvum SL003B-26A1	strain=SL003B-26A1		latest	Complete Genome	Major	Full	2011-03-18	ASM19274v1	College of Engineering, Peking University	GCA_000192745.1	identical	ftp://ftp.ncbi.nlm.nih.gov/genomes/all/GCF/000/192/745/GCF_000192745.1_ASM19274v1		assembly from type material
GCF_000192865.1	PRJNA224116	SAMN00713593		representative genome	717774	119864	Marinomonas mediterranea MMB-1	strain=MMB-1		latest	Complete Genome	Major	Full	2011-03-22	ASM19286v1	US DOE Joint Genome Institute	GCA_000192865.1	identical	ftp://ftp.ncbi.nlm.nih.gov/genomes/all/GCF/000/192/865/GCF_000192865.1_ASM19286v1		assembly from type material
GCF_000193395.1	PRJNA224116	SAMN00031760		representative genome	767031	28129	Prevotella denticola F0289	strain=F0289		latest	Complete Genome	Major	Full	2011-03-28	ASM19339v1	J. Craig Venter Institute	GCA_000193395.1	identical	ftp://ftp.ncbi.nlm.nih.gov/genomes/all/GCF/000/193/395/GCF_000193395.1_ASM19339v1
GCF_000194135.1	PRJNA224116	SAMN00713597		representative genome	760142	84405	Hippea maritima DSM 10411	strain=DSM 10411		latest	Complete Genome	Major	Full	2011-03-29	ASM19413v1	US DOE Joint Genome Institute (JGI-PGF)	GCA_000194135.1	identical	ftp://ftp.ncbi.nlm.nih.gov/genomes/all/GCF/000/194/135/GCF_000194135.1_ASM19413v1		assembly from type material
GCF_000194605.1	PRJNA224116	SAMN00713599		representative genome	755732	191579	Fluviicola taffensis DSM 16823	strain=DSM 16823		latest	Complete Genome	Major	Full	2011-03-31	ASM19460v1	US DOE Joint Genome Institute (JGI-PGF)	GCA_000194605.1	identical	ftp://ftp.ncbi.nlm.nih.gov/genomes/all/GCF/000/194/605/GCF_000194605.1_ASM19460v1		assembly from type material
GCF_000194625.1	PRJNA224116	SAMN00713598		representative genome	693661	58290	Archaeoglobus veneficus SNP6	strain=SNP6		latest	Complete Genome	Major	Full	2011-03-31	ASM19462v1	US DOE Joint Genome Institute (JGI-PGF)	GCA_000194625.1	identical	ftp://ftp.ncbi.nlm.nih.gov/genomes/all/GCF/000/194/625/GCF_000194625.1_ASM19462v1		assembly from type material
GCF_000195275.1	PRJNA224116	SAMN00713601		representative genome	869209	167	Treponema succinifaciens DSM 2489	strain=DSM 2489		latest	Complete Genome	Major	Full	2011-04-07	ASM19527v1	US DOE Joint Genome Institute (JGI-PGF)	GCA_000195275.1	identical	ftp://ftp.ncbi.nlm.nih.gov/genomes/all/GCF/000/195/275/GCF_000195275.1_ASM19527v1		assembly from type material
GCF_000195295.1	PRJNA224116	SAMN00713603		representative genome	880072	60893	Desulfobacca acetoxidans DSM 11109	strain=DSM 11109		latest	Complete Genome	Major	Full	2011-04-07	ASM19529v1	US DOE Joint Genome Institute (JGI-PGF)	GCA_000195295.1	identical	ftp://ftp.ncbi.nlm.nih.gov/genomes/all/GCF/000/195/295/GCF_000195295.1_ASM19529v1		assembly from type material
GCF_000195315.1	PRJNA224116	SAMN00713604		representative genome	700015	33871	Coriobacterium glomerans PW2	strain=PW2		latest	Complete Genome	Major	Full	2011-04-07	ASM19531v1	US DOE Joint Genome Institute (JGI-PGF)	GCA_000195315.1	identical	ftp://ftp.ncbi.nlm.nih.gov/genomes/all/GCF/000/195/315/GCF_000195315.1_ASM19531v1		assembly from type material
GCF_000195335.1	PRJNA224116	SAMN00713602		representative genome	869210	186192	Marinithermus hydrothermalis DSM 14884	strain=DSM 14884		latest	Complete Genome	Major	Full	2011-04-07	ASM19533v1	US DOE Joint Genome Institute (JGI-PGF)	GCA_000195335.1	identical	ftp://ftp.ncbi.nlm.nih.gov/genomes/all/GCF/000/195/335/GCF_000195335.1_ASM19533v1		assembly from type material
GCF_000195775.1	PRJNA224116	SAMEA3138319		representative genome	258594	1076	Rhodopseudomonas palustris CGA009	strain=CGA009		latest	Complete Genome	Major	Full	2003-12-11	ASM19577v1	DOE Joint Genome Institute	GCA_000195775.1	identical	ftp://ftp.ncbi.nlm.nih.gov/genomes/all/GCF/000/195/775/GCF_000195775.1_ASM19577v1
GCF_000195875.1	PRJNA224116	SAMEA3138324		representative genome	272635	2107	Mycoplasma pulmonis UAB CTIP	strain=UAB CTIP		latest	Complete Genome	Major	Full	2003-05-06	ASM19587v1	Genoscope	GCA_000195875.1	identical	ftp://ftp.ncbi.nlm.nih.gov/genomes/all/GCF/000/195/875/GCF_000195875.1_ASM19587v1
GCF_000195915.1	PRJNA224116	SAMEA3138325		representative genome	273075	2303	Thermoplasma acidophilum DSM 1728	strain=DSM 1728		latest	Complete Genome	Major	Full	2003-05-06	ASM19591v1	Max-Plank-Institute	GCA_000195915.1	identical	ftp://ftp.ncbi.nlm.nih.gov/genomes/all/GCF/000/195/915/GCF_000195915.1_ASM19591v1		assembly from type material
GCF_000195935.2	PRJNA224116	SAMEA3283067		representative genome	272844	29292	Pyrococcus abyssi GE5			latest	Complete Genome	Major	Full	2003-05-06	ASM19593v2	Genoscope	GCA_000195935.2	identical	ftp://ftp.ncbi.nlm.nih.gov/genomes/all/GCF/000/195/935/GCF_000195935.2_ASM19593v1		assembly from type material
GCF_000196015.1	PRJNA224116	SAMN02598450		representative genome	266264	119219	Cupriavidus metallidurans CH34	strain=CH34		latest	Complete Genome	Major	Full	2010-02-04	ASM19601v1	DOE Joint Genome Institute	GCA_000196015.1	identical	ftp://ftp.ncbi.nlm.nih.gov/genomes/all/GCF/000/196/015/GCF_000196015.1_ASM19601v1		assembly from type material
GCF_000196135.1	PRJNA224116	SAMEA3138333		representative genome	273121	844	Wolinella succinogenes DSM 1740	strain=DSMZ 1740		latest	Complete Genome	Major	Full	2003-09-08	ASM19613v1	Max-Plank-Institute	GCA_000196135.1	identical	ftp://ftp.ncbi.nlm.nih.gov/genomes/all/GCF/000/196/135/GCF_000196135.1_ASM19613v1		assembly from type material
GCF_000196175.1	PRJNA224116	SAMEA3138335		representative genome	264462	959	Bdellovibrio bacteriovorus HD100	strain=HD100		latest	Complete Genome	Major	Full	2004-02-10	ASM19617v1	Max-Planck-Institute	GCA_000196175.1	identical	ftp://ftp.ncbi.nlm.nih.gov/genomes/all/GCF/000/196/175/GCF_000196175.1_ASM19617v1		assembly from type material
GCF_000196255.1	PRJNA224116	SAMEA3138336		representative genome	298386	74109	Photobacterium profundum SS9	strain=SS9		latest	Complete Genome	Major	Full	2004-05-17	ASM19625v1	University of Padova, Italy	GCA_000196255.1	identical	ftp://ftp.ncbi.nlm.nih.gov/genomes/all/GCF/000/196/255/GCF_000196255.1_ASM19625v1
GCF_000196275.1	PRJNA224116	SAMN02598303		representative genome	319795	68909	Deinococcus geothermalis DSM 11300	strain=DSM 11300		latest	Complete Genome	Major	Full	2007-10-17	ASM19627v1	US DOE Joint Genome Institute	GCA_000196275.1	identical	ftp://ftp.ncbi.nlm.nih.gov/genomes/all/GCF/000/196/275/GCF_000196275.1_ASM19627v1		assembly from type material
GCF_000196295.1	PRJNA224116	SAMEA3138337		representative genome	489653	486	Neisseria lactamica 020-06	strain=020-06		latest	Complete Genome	Major	Full	2010-11-30	ASM19629v1	Sanger Institute	GCA_000196295.1	identical	ftp://ftp.ncbi.nlm.nih.gov/genomes/all/GCF/000/196/295/GCF_000196295.1_ASM19629v1
GCF_000196315.1	PRJNA224116	SAMN02603922		representative genome	216432	313588	Croceibacter atlanticus HTCC2559	strain=HTCC2559		latest	Complete Genome	Major	Full	2010-06-09	ASM19631v1	The Gordon and Betty Moore Foundation Marine Microbiology Initiative	GCA_000196315.1	identical	ftp://ftp.ncbi.nlm.nih.gov/genomes/all/GCF/000/196/315/GCF_000196315.1_ASM19631v1		assembly from type material
GCF_000196355.1	PRJNA224116	SAMN02598322		representative genome	323848	1231	Nitrosospira multiformis ATCC 25196	strain=ATCC 25196		latest	Complete Genome	Major	Full	2005-11-15	ASM19635v1	DOE Joint Genome Institute	GCA_000196355.1	identical	ftp://ftp.ncbi.nlm.nih.gov/genomes/all/GCF/000/196/355/GCF_000196355.1_ASM19635v1		assembly from type material
GCF_000196395.1	PRJNA224116	SAMN02603664		representative genome	382245	645	Aeromonas salmonicida subsp. salmonicida A449	strain=A449		latest	Complete Genome	Major	Full	2007-04-06	ASM19639v1	National Research Council Canada - Institute of Marine Biosciences	GCA_000196395.1	identical	ftp://ftp.ncbi.nlm.nih.gov/genomes/all/GCF/000/196/395/GCF_000196395.1_ASM19639v1
GCF_000196435.1	PRJNA224116	SAMEA3138339		representative genome	382640	85701	Bartonella tribocorum CIP 105476			latest	Complete Genome	Major	Full	2007-11-25	ASM19643v1	Department of Biochemistry and Molecular Biology, Center for Comparative Genomics and Bioinformatics Center for Infectious Disease Dynamics, Penn State University	GCA_000196435.1	identical	ftp://ftp.ncbi.nlm.nih.gov/genomes/all/GCF/000/196/435/GCF_000196435.1_ASM19643v1		assembly from type material
GCF_000196455.1	PRJNA224116	SAMEA3138340		representative genome	1511	1511	Acetoanaerobium sticklandii	strain=DSM 519		latest	Complete Genome	Major	Full	2010-10-16	ASM19645v1	Genoscope-CEA	GCA_000196455.1	identical	ftp://ftp.ncbi.nlm.nih.gov/genomes/all/GCF/000/196/455/GCF_000196455.1_ASM19645v1		assembly from type material
GCF_000196495.1	PRJNA224116	SAMEA1705917		representative genome	316275	40269	Aliivibrio salmonicida LFI1238	strain=LFI1238		latest	Complete Genome	Major	Full	2008-10-01	ASM19649v1	The Pathogen Sequencing Unit, The Wellcome Trust Sanger Institute	GCA_000196495.1	identical	ftp://ftp.ncbi.nlm.nih.gov/genomes/all/GCF/000/196/495/GCF_000196495.1_ASM19649v1
GCF_000196515.1	PRJNA224116	SAMN02598476		representative genome	551115	1164	'Nostoc azollae' 0708	strain=0708		latest	Complete Genome	Major	Full	2010-06-14	ASM19651v1	US DOE Joint Genome Institute (JGI-PGF)	GCA_000196515.1	identical	ftp://ftp.ncbi.nlm.nih.gov/genomes/all/GCF/000/196/515/GCF_000196515.1_ASM19651v1
GCF_000196535.1	PRJNA224116	SAMN00001505		representative genome	548479	2051	Mobiluncus curtisii ATCC 43063	strain=ATCC 43063		latest	Complete Genome	Major	Full	2010-06-14	ASM19653v1	Baylor College of Medicine	GCA_000196535.1	identical	ftp://ftp.ncbi.nlm.nih.gov/genomes/all/GCF/000/196/535/GCF_000196535.1_ASM19653v1		assembly from synonym type material
GCF_000196615.1	PRJNA224116	SAMEA2272131		representative genome	634500	182337	Erwinia billingiae Eb661	strain=Eb661		latest	Complete Genome	Major	Full	2010-06-22	ASM19661v1	Max Planck Society	GCA_000196615.1	identical	ftp://ftp.ncbi.nlm.nih.gov/genomes/all/GCF/000/196/615/GCF_000196615.1_ASM19661v1
GCF_000196655.1	PRJNA224116	SAMN00015125		representative genome	644295	2322	Methanohalobium evestigatum Z-7303	strain=Z-7303		latest	Complete Genome	Major	Full	2010-06-15	ASM19665v1	US DOE Joint Genome Institute	GCA_000196655.1	identical	ftp://ftp.ncbi.nlm.nih.gov/genomes/all/GCF/000/196/655/GCF_000196655.1_ASM19665v1		assembly from type material
GCF_000196675.1	PRJNA224116	SAMN00713596		representative genome	675635	240495	Pseudonocardia dioxanivorans CB1190	strain=CB1190		latest	Complete Genome	Major	Full	2011-03-28	ASM19667v1	US DOE Joint Genome Institute	GCA_000196675.1	identical	ftp://ftp.ncbi.nlm.nih.gov/genomes/all/GCF/000/196/675/GCF_000196675.1_ASM19667v1		assembly from type material
GCF_000196695.1	PRJNA224116	SAMEA2272695		representative genome	685727	43767	Rhodococcus hoagii 103S	strain=103S		latest	Complete Genome	Major	Full	2010-11-11	ASM19669v1	IREC (International Rhodococcus equi Genome Consortium)	GCA_000196695.1	identical	ftp://ftp.ncbi.nlm.nih.gov/genomes/all/GCF/000/196/695/GCF_000196695.1_ASM19669v1
GCF_000196735.1	PRJNA224116	SAMEA2272088		representative genome	692420	1390	Bacillus amyloliquefaciens DSM 7 = ATCC 23350	strain=DSM 7		latest	Complete Genome	Major	Full	2010-09-23	ASM19673v1	Cebitec, Bielefeld University	GCA_000196735.1	identical	ftp://ftp.ncbi.nlm.nih.gov/genomes/all/GCF/000/196/735/GCF_000196735.1_ASM19673v1		assembly from type material
GCF_000196815.1	PRJNA224116	SAMEA2272290		representative genome	330214	330214	Nitrospira defluvii			latest	Complete Genome	Major	Full	2010-07-14	ASM19681v1	Genoscope / CEA	GCA_000196815.1	identical	ftp://ftp.ncbi.nlm.nih.gov/genomes/all/GCF/000/196/815/GCF_000196815.1_ASM19681v1
GCF_000196895.1	PRJNA224116	SAMN02603490		representative genome	795797	413810	Halalkalicoccus jeotgali B3	strain=B3		latest	Complete Genome	Major	Full	2010-06-23	ASM19689v1	Kyung Hee University	GCA_000196895.1	identical	ftp://ftp.ncbi.nlm.nih.gov/genomes/all/GCF/000/196/895/GCF_000196895.1_ASM19689v1		assembly from type material
GCF_000197735.1	PRJNA224116	SAMEA2272213		representative genome	861360	256701	Glutamicibacter arilaitensis Re117	strain=Re117		latest	Complete Genome	Major	Full	2010-09-27	ASM19773v1	I.N.R.A. , French National Institute for Agricultural Research	GCA_000197735.1	identical	ftp://ftp.ncbi.nlm.nih.gov/genomes/all/GCF/000/197/735/GCF_000197735.1_ASM19773v1		assembly from type material
GCF_000198775.1	PRJNA224116	SAMEA2272497		representative genome	882378	412963	Paraburkholderia rhizoxinica HKI 454	strain=HKI 454	B1	latest	Complete Genome	Major	Full	2010-11-16	ASM19877v1	Leibniz Institute for Natural Product Research and Infection Biology (HKI)	GCA_000198775.1	identical	ftp://ftp.ncbi.nlm.nih.gov/genomes/all/GCF/000/198/775/GCF_000198775.1_ASM19877v1		assembly from type material
GCF_000199675.1	PRJNA224116	SAMD00061114		representative genome	926569	167964	Anaerolinea thermophila UNI-1	strain=UNI-1		latest	Complete Genome	Major	Full	2011-01-24	ASM19967v1	National Institute of Technology and Evaluation	GCA_000199675.1	identical	ftp://ftp.ncbi.nlm.nih.gov/genomes/all/GCF/000/199/675/GCF_000199675.1_ASM19967v1		assembly from type material
GCF_000200595.1	PRJNA224116	SAMEA2272759		representative genome	936155	214	Helicobacter felis ATCC 49179	strain=ATCC 49179		latest	Complete Genome	Major	Full	2011-03-15	ASM20059v1	Wellcome Trust Sanger Institute	GCA_000200595.1	identical	ftp://ftp.ncbi.nlm.nih.gov/genomes/all/GCF/000/200/595/GCF_000200595.1_ASM20059v1		assembly from type material
GCF_000202635.1	PRJNA224116	SAMD00060982		representative genome	979556	2033	Microbacterium testaceum StLB037	strain=StLB037		latest	Complete Genome	Major	Full	2011-02-10	ASM20263v1	Utsunomiya University	GCA_000202635.1	identical	ftp://ftp.ncbi.nlm.nih.gov/genomes/all/GCF/000/202/635/GCF_000202635.1_ASM20263v1
GCF_000202835.1	PRJNA224116	SAMD00060977		representative genome	926570	62140	Acidiphilium multivorum AIU301	strain=AIU301		latest	Complete Genome	Major	Full	2011-03-01	ASM20283v1	National Institute of Technology and Evaluation	GCA_000202835.1	identical	ftp://ftp.ncbi.nlm.nih.gov/genomes/all/GCF/000/202/835/GCF_000202835.1_ASM20283v1		assembly from type material
GCF_000203895.1	PRJNA224116	SAMN02598290		representative genome	318586	266	Paracoccus denitrificans PD1222	strain=PD1222		latest	Complete Genome	Major	Full	2006-12-13	ASM20389v1	DOE Joint Genome Institute	GCA_000203895.1	identical	ftp://ftp.ncbi.nlm.nih.gov/genomes/all/GCF/000/203/895/GCF_000203895.1_ASM20389v1
GCF_000204135.1	PRJNA224116	SAMN02603383		representative genome	331635	85991	Chlamydia pecorum E58	strain=E58		latest	Complete Genome	Major	Full	2011-04-13	ASM20413v1	Institute for Genome Sciences, University Of Maryland School of Medicine	GCA_000204135.1	identical	ftp://ftp.ncbi.nlm.nih.gov/genomes/all/GCF/000/204/135/GCF_000204135.1_ASM20413v1		assembly from type material
GCF_000204155.1	PRJNA224116	SAMN02603167		representative genome	263358	1003110	Verrucosispora maris AB-18-032	strain=AB-18-032		latest	Complete Genome	Major	Full	2011-04-13	ASM20415v1	CSBL at Korea University	GCA_000204155.1	identical	ftp://ftp.ncbi.nlm.nih.gov/genomes/all/GCF/000/204/155/GCF_000204155.1_ASM20415v1		assembly from type material
GCF_000204255.1	PRJNA224116	SAMN02603382		representative genome	331636	83554	Chlamydia psittaci 6BC	strain=6BC		latest	Complete Genome	Major	Full	2011-04-14	ASM20425v1	Institute for Genome Sciences, University Of Maryland School of Medicine	GCA_000204255.1	identical	ftp://ftp.ncbi.nlm.nih.gov/genomes/all/GCF/000/204/255/GCF_000204255.1_ASM20425v1		assembly from type material
GCF_000204415.1	PRJNA224116	SAMN02604263		representative genome	990316	2223	Methanothrix soehngenii GP6	strain=GP6		latest	Complete Genome	Major	Full	2011-04-15	ASM20441v1	University of Wisconsin-Parkside	GCA_000204415.1	identical	ftp://ftp.ncbi.nlm.nih.gov/genomes/all/GCF/000/204/415/GCF_000204415.1_ASM20441v1		assembly from synonym type material
GCF_000204565.1	PRJNA224116	SAMN02603671		representative genome	929506	1491	Clostridium botulinum BKT015925	strain=BKT015925		latest	Complete Genome	Major	Full	2011-04-18	ASM20456v1	National Veterinary Institute (SVA), Sweden	GCA_000204565.1	identical	ftp://ftp.ncbi.nlm.nih.gov/genomes/all/GCF/000/204/565/GCF_000204565.1_ASM20456v1
GCF_000204645.1	PRJNA224116	SAMN00713606		representative genome	596154	179636	Alicycliphilus denitrificans K601	strain=K601		latest	Complete Genome	Major	Full	2011-04-19	ASM20464v1	US DOE Joint Genome Institute	GCA_000204645.1	identical	ftp://ftp.ncbi.nlm.nih.gov/genomes/all/GCF/000/204/645/GCF_000204645.1_ASM20464v1		assembly from type material
GCF_000204925.1	PRJNA224116	SAMN02603221		representative genome	1006006	1006005	Metallosphaera cuprina Ar-4	strain=Ar-4		latest	Complete Genome	Major	Full	2011-04-19	ASM20492v1	Environmental Microbiology Research Center (EMRC)	GCA_000204925.1	identical	ftp://ftp.ncbi.nlm.nih.gov/genomes/all/GCF/000/204/925/GCF_000204925.1_ASM20492v1		assembly from type material
GCF_000208385.1	PRJNA224116	SAMN00713608		representative genome	760011	273376	Sphaerochaeta coccoides DSM 17374	strain=DSM 17374		latest	Complete Genome	Major	Full	2011-04-21	ASM20838v1	US DOE Joint Genome Institute (JGI-PGF)	GCA_000208385.1	identical	ftp://ftp.ncbi.nlm.nih.gov/genomes/all/GCF/000/208/385/GCF_000208385.1_ASM20838v1		assembly from type material
GCF_000208405.1	PRJNA224116	SAMN00713607		representative genome	546271	69823	Selenomonas sputigena ATCC 35185	strain=ATCC 35185		latest	Complete Genome	Major	Full	2011-04-21	ASM20840v1	US DOE Joint Genome Institute (JGI-PGF)	GCA_000208405.1	identical	ftp://ftp.ncbi.nlm.nih.gov/genomes/all/GCF/000/208/405/GCF_000208405.1_ASM20840v1		assembly designated as neotype
GCF_000209675.1	PRJNA224116	SAMN02604222		representative genome	1005058	750	Gallibacterium anatis UMN179	strain=UMN179		latest	Complete Genome	Major	Full	2011-04-26	ASM20967v1	University of Minnesota	GCA_000209675.1	identical	ftp://ftp.ncbi.nlm.nih.gov/genomes/all/GCF/000/209/675/GCF_000209675.1_ASM20967v1
GCF_000210915.2	PRJNA224116	SAMEA3138385		representative genome	862908	97084	Halobacteriovorax marinus SJ	strain=SJ		latest	Complete Genome	Major	Full	2012-11-02	ASM21091v2	Wellcome Trust Sanger Institute	GCA_000210915.2	identical	ftp://ftp.ncbi.nlm.nih.gov/genomes/all/GCF/000/210/915/GCF_000210915.2_ASM21091v2		assembly from type material
GCF_000212375.1	PRJNA224116	SAMN00713611		representative genome	879243	28123	Porphyromonas asaccharolytica DSM 20707	strain=DSM 20707		latest	Complete Genome	Major	Full	2011-05-05	ASM21237v1	US DOE Joint Genome Institute (JGI-PGF)	GCA_000212375.1	identical	ftp://ftp.ncbi.nlm.nih.gov/genomes/all/GCF/000/212/375/GCF_000212375.1_ASM21237v1		assembly from type material
GCF_000212395.1	PRJNA224116	SAMN00713612		representative genome	747365	184064	Thermodesulfobium narugense DSM 14796	strain=DSM 14796		latest	Complete Genome	Major	Full	2011-05-05	ASM21239v1	US DOE Joint Genome Institute (JGI-PGF)	GCA_000212395.1	identical	ftp://ftp.ncbi.nlm.nih.gov/genomes/all/GCF/000/212/395/GCF_000212395.1_ASM21239v1		assembly from type material
GCF_000212415.1	PRJNA224116	SAMN00713613		representative genome	906968	81028	Treponema brennaborense DSM 12168	strain=DSM 12168		latest	Complete Genome	Major	Full	2011-05-05	ASM21241v1	US DOE Joint Genome Institute (JGI-PGF)	GCA_000212415.1	identical	ftp://ftp.ncbi.nlm.nih.gov/genomes/all/GCF/000/212/415/GCF_000212415.1_ASM21241v1		assembly from type material
GCF_000212675.2	PRJNA224116	SAMN00713616		representative genome	690850	873	Desulfocurvibacter africanus subsp. africanus str. Walvis Bay	strain=Walvis Bay		latest	Complete Genome	Major	Full	2012-01-04	ASM21267v2	US DOE Joint Genome Institute	GCA_000212675.2	identical	ftp://ftp.ncbi.nlm.nih.gov/genomes/all/GCF/000/212/675/GCF_000212675.2_ASM21267v2
GCF_000212695.1	PRJNA224116	SAMN00713615		representative genome	590998	1708	Cellulomonas fimi ATCC 484	strain=ATCC 484		latest	Complete Genome	Major	Full	2011-05-09	ASM21269v1	US DOE Joint Genome Institute	GCA_000212695.1	identical	ftp://ftp.ncbi.nlm.nih.gov/genomes/all/GCF/000/212/695/GCF_000212695.1_ASM21269v1		assembly from type material
GCF_000212735.1	PRJNA224116	SAMN00713614		representative genome	760192	2350	Haliscomenobacter hydrossis DSM 1100	strain=DSM 1100		latest	Complete Genome	Major	Full	2011-05-09	ASM21273v1	US DOE Joint Genome Institute (JGI-PGF)	GCA_000212735.1	identical	ftp://ftp.ncbi.nlm.nih.gov/genomes/all/GCF/000/212/735/GCF_000212735.1_ASM21273v1		assembly from type material
GCF_000213215.1	PRJNA224116	SAMN02602984		representative genome	933801	563177	Acidianus hospitalis W1	strain=W1		latest	Complete Genome	Major	Full	2011-05-12	ASM21321v1	Archaea Centre, Department of Biology, University of Copenhagen, Copenhagen 2200 N, Denmark	GCA_000213215.1	identical	ftp://ftp.ncbi.nlm.nih.gov/genomes/all/GCF/000/213/215/GCF_000213215.1_ASM21321v1
GCF_000213255.1	PRJNA224116	SAMN02232034		representative genome	697281	252966	Mahella australiensis 50-1 BON	strain=50-1 BON		latest	Complete Genome	Major	Full	2011-05-12	ASM21325v1	US DOE Joint Genome Institute (JGI-PGF)	GCA_000213255.1	identical	ftp://ftp.ncbi.nlm.nih.gov/genomes/all/GCF/000/213/255/GCF_000213255.1_ASM21325v1		assembly from type material
GCF_000213805.1	PRJNA224116	SAMN00713619		representative genome	743720	47880	Pseudomonas fulva 12-X	strain=12-X		latest	Complete Genome	Major	Full	2011-05-17	ASM21380v1	US DOE Joint Genome Institute	GCA_000213805.1	identical	ftp://ftp.ncbi.nlm.nih.gov/genomes/all/GCF/000/213/805/GCF_000213805.1_ASM21380v1
GCF_000213825.1	PRJNA224116	SAMN02603301		representative genome	936154	1348	Streptococcus parauberis KCTC 11537	strain=KCTC 11537		latest	Complete Genome	Major	Full	2011-05-17	ASM21382v1	Gyeongsang National University, Aquatic Biotechnology Center of WCU project	GCA_000213825.1	identical	ftp://ftp.ncbi.nlm.nih.gov/genomes/all/GCF/000/213/825/GCF_000213825.1_ASM21382v1
GCF_000214095.2	PRJNA224116	SAMN00713557		representative genome	743299	160808	Acidithiobacillus ferrivorans SS3	strain=SS3		latest	Complete Genome	Major	Full	2011-08-17	ASM21409v3	US DOE Joint Genome Institute (JGI-PGF)	GCA_000214095.3	identical	ftp://ftp.ncbi.nlm.nih.gov/genomes/all/GCF/000/214/095/GCF_000214095.2_ASM21409v3
GCF_000214155.1	PRJNA224116	SAMN02603865		representative genome	875328	875328	Mycolicibacter sinensis	strain=JDM601		latest	Complete Genome	Major	Full	2011-05-20	ASM21415v1	Shanghai Jiao Tong University School of Medicine	GCA_000214155.1	identical	ftp://ftp.ncbi.nlm.nih.gov/genomes/all/GCF/000/214/155/GCF_000214155.1_ASM21415v1		assembly from type material
GCF_000214175.1	PRJNA224116	SAMN02603151		representative genome	443218	639313	Hoyosella subflava DQS3-9A1	strain=DQS3-9A1		latest	Complete Genome	Major	Full	2011-05-20	ASM21417v1	College of Engineering, Peking University	GCA_000214175.1	identical	ftp://ftp.ncbi.nlm.nih.gov/genomes/all/GCF/000/214/175/GCF_000214175.1_ASM21417v1		assembly from type material
GCF_000214215.1	PRJNA224116	SAMN00713622		representative genome	491952	936476	Marinomonas posidonica IVIA-Po-181	strain=IVIA-Po-181		latest	Complete Genome	Major	Full	2011-05-20	ASM21421v1	US DOE Joint Genome Institute	GCA_000214215.1	identical	ftp://ftp.ncbi.nlm.nih.gov/genomes/all/GCF/000/214/215/GCF_000214215.1_ASM21421v1		assembly from type material
GCF_000214355.1	PRJNA224116	SAMN02603453		representative genome	545695	150829	Treponema azotonutricium ZAS-9	strain=ZAS-9		latest	Complete Genome	Major	Full	2011-05-23	ASM21435v1	J. Craig Venter Institute	GCA_000214355.1	identical	ftp://ftp.ncbi.nlm.nih.gov/genomes/all/GCF/000/214/355/GCF_000214355.1_ASM21435v1		assembly from type material
GCF_000214375.1	PRJNA224116	SAMN02603452		representative genome	545694	88058	Treponema primitia ZAS-2	strain=ZAS-2		latest	Complete Genome	Major	Full	2011-05-23	ASM21437v1	J. Craig Venter Institute	GCA_000214375.1	identical	ftp://ftp.ncbi.nlm.nih.gov/genomes/all/GCF/000/214/375/GCF_000214375.1_ASM21437v1		assembly from type material
GCF_000214415.1	PRJNA224116	SAMN00713627		representative genome	880724	2189	Methanotorris igneus Kol 5	strain=Kol 5		latest	Complete Genome	Major	Full	2011-05-23	ASM21441v1	US DOE Joint Genome Institute	GCA_000214415.1	identical	ftp://ftp.ncbi.nlm.nih.gov/genomes/all/GCF/000/214/415/GCF_000214415.1_ASM21441v1		assembly from type material
GCF_000214435.1	PRJNA224116	SAMN00713626		representative genome	868595	1565	Desulfotomaculum nigrificans CO-1-SRB	strain=CO-1-SRB		latest	Complete Genome	Major	Full	2011-05-23	ASM21443v1	US DOE Joint Genome Institute	GCA_000214435.1	identical	ftp://ftp.ncbi.nlm.nih.gov/genomes/all/GCF/000/214/435/GCF_000214435.1_ASM21443v1		assembly from synonym type material
GCF_000214665.1	PRJNA224116	SAMN00713628		representative genome	857087	421	Methylomonas methanica MC09	strain=MC09		latest	Complete Genome	Major	Full	2011-05-24	ASM21466v1	US DOE Joint Genome Institute	GCA_000214665.1	identical	ftp://ftp.ncbi.nlm.nih.gov/genomes/all/GCF/000/214/665/GCF_000214665.1_ASM21466v1
GCF_000214725.1	PRJNA224116	SAMN00713630		representative genome	868131	868131	Methanobacterium paludis	strain=SWAN1		latest	Complete Genome	Major	Full	2011-05-24	ASM21472v1	US DOE Joint Genome Institute	GCA_000214725.1	identical	ftp://ftp.ncbi.nlm.nih.gov/genomes/all/GCF/000/214/725/GCF_000214725.1_ASM21472v1		assembly from type material
GCF_000214785.1	PRJNA224116	SAMN02603965		representative genome	1033837	267818	Lactobacillus kefiranofaciens ZW3	strain=ZW3		latest	Complete Genome	Major	Full	2011-05-25	ASM21478v1	TianJin university of science and technology	GCA_000214785.1	identical	ftp://ftp.ncbi.nlm.nih.gov/genomes/all/GCF/000/214/785/GCF_000214785.1_ASM21478v1
GCF_000214825.1	PRJNA224116	SAMN02232061		representative genome	717773	147268	Thiomicrospira cyclica ALM1	strain=ALM1		latest	Complete Genome	Major	Full	2011-05-25	ASM21482v1	US DOE Joint Genome Institute	GCA_000214825.1	identical	ftp://ftp.ncbi.nlm.nih.gov/genomes/all/GCF/000/214/825/GCF_000214825.1_ASM21482v1		assembly from type material
GCF_000215085.1	PRJNA224116	SAMN00713633		representative genome	696281	1564	Desulfotomaculum ruminis DSM 2154	strain=DSM 2154		latest	Complete Genome	Major	Full	2011-05-26	ASM21508v1	US DOE Joint Genome Institute	GCA_000215085.1	identical	ftp://ftp.ncbi.nlm.nih.gov/genomes/all/GCF/000/215/085/GCF_000215085.1_ASM21508v1		assembly from type material
GCF_000215105.1	PRJNA224116	SAMN00713634		representative genome	743718	139208	Isoptericola variabilis 225	strain=225		latest	Complete Genome	Major	Full	2011-05-26	ASM21510v1	US DOE Joint Genome Institute	GCA_000215105.1	identical	ftp://ftp.ncbi.nlm.nih.gov/genomes/all/GCF/000/215/105/GCF_000215105.1_ASM21510v1
GCF_000215705.1	PRJNA224116	SAMN02603053		representative genome	365046	94132	Ramlibacter tataouinensis TTB310	strain=TTB310		latest	Complete Genome	Major	Full	2011-06-03	ASM21570v1	CEA-CNRS	GCA_000215705.1	identical	ftp://ftp.ncbi.nlm.nih.gov/genomes/all/GCF/000/215/705/GCF_000215705.1_ASM21570v1		assembly from type material
GCF_000215975.1	PRJNA224116	SAMN02232058		representative genome	795359	1295609	Thermodesulfobacterium geofontis OPF15	strain=OPF15		latest	Complete Genome	Major	Full	2011-06-07	ASM21597v1	US DOE Joint Genome Institute	GCA_000215975.1	identical	ftp://ftp.ncbi.nlm.nih.gov/genomes/all/GCF/000/215/975/GCF_000215975.1_ASM21597v1		assembly from type material
GCF_000215995.1	PRJNA224116	SAMN02603867		representative genome	529709	1008460	Pyrococcus yayanosii CH1	strain=CH1		latest	Complete Genome	Major	Full	2011-06-07	ASM21599v1	Shanghai JiaoTong University	GCA_000215995.1	identical	ftp://ftp.ncbi.nlm.nih.gov/genomes/all/GCF/000/215/995/GCF_000215995.1_ASM21599v1		assembly from type material
GCF_000217635.1	PRJNA224116	SAMN02603413		representative genome	261317	9	Buchnera aphidicola (Cinara tujafilina)			latest	Complete Genome	Major	Full	2011-06-09	ASM21763v1	Instituto Cavanilles Biodiversidad y Biologia evolutiva.Universidad Valencia	GCA_000217635.1	identical	ftp://ftp.ncbi.nlm.nih.gov/genomes/all/GCF/000/217/635/GCF_000217635.1_ASM21763v1
GCF_000217675.1	PRJNA224116	SAMN02603689		representative genome	882102	55601	Vibrio anguillarum 775	strain=775		latest	Complete Genome	Major	Full	2011-06-09	ASM21767v1	Oregon Health and Science University	GCA_000217675.1	identical	ftp://ftp.ncbi.nlm.nih.gov/genomes/all/GCF/000/217/675/GCF_000217675.1_ASM21767v1
GCF_000217715.1	PRJNA224116	SAMN02232028		representative genome	797210	387343	Halopiger xanaduensis SH-6	strain=SH-6		latest	Complete Genome	Major	Full	2011-06-09	ASM21771v1	US DOE Joint Genome Institute	GCA_000217715.1	identical	ftp://ftp.ncbi.nlm.nih.gov/genomes/all/GCF/000/217/715/GCF_000217715.1_ASM21771v1		assembly from type material
GCF_000217795.1	PRJNA224116	SAMN02232057		representative genome	667014	171695	Thermodesulfatator indicus DSM 15286	strain=DSM 15286		latest	Complete Genome	Major	Full	2011-06-10	ASM21779v1	US DOE Joint Genome Institute (JGI-PGF)	GCA_000217795.1	identical	ftp://ftp.ncbi.nlm.nih.gov/genomes/all/GCF/000/217/795/GCF_000217795.1_ASM21779v1		assembly from type material
GCF_000217815.1	PRJNA224116	SAMN02232059		representative genome	688269	119394	Pseudothermotoga thermarum DSM 5069	strain=DSM 5069		latest	Complete Genome	Major	Full	2011-06-10	ASM21781v1	US DOE Joint Genome Institute (JGI-PGF)	GCA_000217815.1	identical	ftp://ftp.ncbi.nlm.nih.gov/genomes/all/GCF/000/217/815/GCF_000217815.1_ASM21781v1		assembly from type material
GCF_000217995.1	PRJNA224116	SAMN02232039		representative genome	679901	39669	Methanosalsum zhilinae DSM 4017	strain=DSM 4017		latest	Complete Genome	Major	Full	2011-06-13	ASM21799v1	US DOE Joint Genome Institute (JGI-PGF)	GCA_000217995.1	identical	ftp://ftp.ncbi.nlm.nih.gov/genomes/all/GCF/000/217/995/GCF_000217995.1_ASM21799v1		assembly from type material
GCF_000218545.1	PRJNA224116	SAMN02232005		representative genome	593907	11	Cellulomonas gilvus ATCC 13127	strain=ATCC 13127		latest	Complete Genome	Major	Full	2011-06-15	ASM21854v1	US DOE Joint Genome Institute	GCA_000218545.1	identical	ftp://ftp.ncbi.nlm.nih.gov/genomes/all/GCF/000/218/545/GCF_000218545.1_ASM21854v1		assembly from type material
GCF_000218565.1	PRJNA224116	SAMN02603254		representative genome	504832	40137	Oligotropha carboxidovorans OM5	strain=OM5		latest	Complete Genome	Major	Full	2011-06-15	ASM21856v1	Georg-August Universit√§t G√∂ttingen	GCA_000218565.1	identical	ftp://ftp.ncbi.nlm.nih.gov/genomes/all/GCF/000/218/565/GCF_000218565.1_ASM21856v1		assembly from type material
GCF_000218625.1	PRJNA224116	SAMN02232022		representative genome	717231	2352	Flexistipes sinusarabici DSM 4947	strain=DSM 4947		latest	Complete Genome	Major	Full	2011-06-15	ASM21862v1	US DOE Joint Genome Institute (JGI-PGF)	GCA_000218625.1	identical	ftp://ftp.ncbi.nlm.nih.gov/genomes/all/GCF/000/218/625/GCF_000218625.1_ASM21862v1		assembly from type material
GCF_000219105.1	PRJNA224116	SAMN02603152		representative genome	35	35	Myxococcus macrosporus	strain=HW-1		latest	Complete Genome	Major	Full	2011-06-22	ASM21910v1	College of Life Science, Shandong University	GCA_000219105.1	identical	ftp://ftp.ncbi.nlm.nih.gov/genomes/all/GCF/000/219/105/GCF_000219105.1_ASM21910v1
GCF_000219215.1	PRJNA224116	SAMN02603269		representative genome	1042878	106590	Cupriavidus necator N-1	strain=N-1		latest	Complete Genome	Major	Full	2011-06-24	ASM21921v1	Georg-August-University Goettingen	GCA_000219215.1	identical	ftp://ftp.ncbi.nlm.nih.gov/genomes/all/GCF/000/219/215/GCF_000219215.1_ASM21921v1		assembly from type material
GCF_000219535.2	PRJNA224116	SAMN02469848		representative genome	1042163	1465	Brevibacillus laterosporus LMG 15441	strain=LMG 15441		latest	Complete Genome	Major	Full	2014-07-22	ASM21953v3	Georg-August-University Goettingen	GCA_000219535.3	identical	ftp://ftp.ncbi.nlm.nih.gov/genomes/all/GCF/000/219/535/GCF_000219535.2_ASM21953v3
GCF_000219605.1	PRJNA224116	SAMN02603041		representative genome	316	316	Pseudomonas stutzeri	strain=CGMCC 1.1803		latest	Complete Genome	Major	Full	2011-06-29	ASM21960v1	Biotechnology Research Institute, Chinese Academy of Agricultural Sciences	GCA_000219605.1	identical	ftp://ftp.ncbi.nlm.nih.gov/genomes/all/GCF/000/219/605/GCF_000219605.1_ASM21960v1		assembly from type material
GCF_000219725.1	PRJNA224116	SAMN02232064		representative genome	744872	215591	Treponema caldarium DSM 7334	strain=DSM 7334		latest	Complete Genome	Major	Full	2011-06-30	ASM21972v1	DOE Joint Genome Institute	GCA_000219725.1	identical	ftp://ftp.ncbi.nlm.nih.gov/genomes/all/GCF/000/219/725/GCF_000219725.1_ASM21972v1		assembly from type material
GCF_000219805.1	PRJNA224116	SAMN02603132		representative genome	1045854	165096	Weissella koreensis KACC 15510	strain=KACC 15510		latest	Complete Genome	Major	Full	2011-06-30	ASM21980v1	Chung-Ang Univ.	GCA_000219805.1	identical	ftp://ftp.ncbi.nlm.nih.gov/genomes/all/GCF/000/219/805/GCF_000219805.1_ASM21980v1
GCF_000220625.1	PRJNA224116	SAMN02603043		representative genome	860228	28188	Capnocytophaga canimorsus Cc5	strain=Cc5		latest	Complete Genome	Major	Full	2011-07-14	ASM22062v1	BIOZENTRUM, Basel university, Switzerland	GCA_000220625.1	identical	ftp://ftp.ncbi.nlm.nih.gov/genomes/all/GCF/000/220/625/GCF_000220625.1_ASM22062v1
GCF_000220645.1	PRJNA224116	SAMN02603718		representative genome	1053692	39152	Methanococcus maripaludis X1	strain=X1		latest	Complete Genome	Major	Full	2011-07-14	ASM22064v1	Ecosystem Sciences, Commonwealth Scientific and Industrial Research Organisation	GCA_000220645.1	identical	ftp://ftp.ncbi.nlm.nih.gov/genomes/all/GCF/000/220/645/GCF_000220645.1_ASM22064v1
GCF_000222305.1	PRJNA224116	SAMN02604204		representative genome	521010	64897	Borreliella bissettii DN127	strain=DN127		latest	Complete Genome	Major	Full	2011-08-01	ASM22230v1	University of Maryland School of Medicine - Institute for Genome Sciences	GCA_000222305.1	identical	ftp://ftp.ncbi.nlm.nih.gov/genomes/all/GCF/000/222/305/GCF_000222305.1_ASM22230v1		assembly from type material
GCF_000222485.1	PRJNA224116	SAMN02261369		representative genome	880070	104	Cyclobacterium marinum DSM 745	strain=DSM 745		latest	Complete Genome	Major	Full	2011-08-03	ASM22248v1	JGI	GCA_000222485.1	identical	ftp://ftp.ncbi.nlm.nih.gov/genomes/all/GCF/000/222/485/GCF_000222485.1_ASM22248v1		assembly from type material
GCF_000223395.1	PRJNA224116	SAMN02232047		representative genome	694429	54252	Pyrolobus fumarii 1A	strain=1A		latest	Complete Genome	Major	Full	2011-08-12	ASM22339v1	DOE Joint Genome Institute	GCA_000223395.1	identical	ftp://ftp.ncbi.nlm.nih.gov/genomes/all/GCF/000/223/395/GCF_000223395.1_ASM22339v1		assembly from type material
GCF_000223905.1	PRJNA224116	SAMN02602960		representative genome	634497	51589	Haloarcula hispanica ATCC 33960	strain=CGMCC 1.2049		latest	Complete Genome	Major	Full	2011-08-17	ASM22390v1	Institute of Microbiology, Chinese Academy of Sciences	GCA_000223905.1	identical	ftp://ftp.ncbi.nlm.nih.gov/genomes/all/GCF/000/223/905/GCF_000223905.1_ASM22390v1		assembly from type material
GCF_000224005.2	PRJNA224116	SAMN02256540		representative genome	765910	37487	Marichromatium purpuratum 984	strain=984		latest	Complete Genome	Major	Full	2014-01-03	ASM22400v3	DOE Joint Genome Institute	GCA_000224005.3	identical	ftp://ftp.ncbi.nlm.nih.gov/genomes/all/GCF/000/224/005/GCF_000224005.2_ASM22400v3		assembly from type material
GCF_000224085.1	PRJNA224116	SAMN02232041		representative genome	886377	111501	Muricauda ruestringensis DSM 13258	strain=DSM 13258		latest	Complete Genome	Major	Full	2011-08-19	ASM22408v1	DOE Joint Genome Institute	GCA_000224085.1	identical	ftp://ftp.ncbi.nlm.nih.gov/genomes/all/GCF/000/224/085/GCF_000224085.1_ASM22408v1		assembly from type material
GCF_000224105.1	PRJNA224116	SAMN02604224		representative genome	743965	2123	Mycoplasma putrefaciens KS1	strain=KS1		latest	Complete Genome	Major	Full	2011-08-19	ASM22410v1	University of Missouri	GCA_000224105.1	identical	ftp://ftp.ncbi.nlm.nih.gov/genomes/all/GCF/000/224/105/GCF_000224105.1_ASM22410v1		assembly from type material
GCF_000224475.1	PRJNA224116	SAMN02232027		representative genome	756883	756883	halophilic archaeon DL31	strain=DL31		latest	Complete Genome	Major	Full	2011-08-26	ASM22447v1	DOE Joint Genome Institute	GCA_000224475.1	identical	ftp://ftp.ncbi.nlm.nih.gov/genomes/all/GCF/000/224/475/GCF_000224475.1_ASM22447v1
GCF_000224985.1	PRJNA224116	SAMN02603606		representative genome	1069534	1623	Lactobacillus ruminis ATCC 27782	strain=ATCC 27782		latest	Complete Genome	Major	Full	2011-09-01	ASM22498v1	Microbiology Dept, University College Cork	GCA_000224985.1	identical	ftp://ftp.ncbi.nlm.nih.gov/genomes/all/GCF/000/224/985/GCF_000224985.1_ASM22498v1
GCF_000225325.1	PRJNA224116	SAMN02603515		representative genome	714313	1625	Lactobacillus sanfranciscensis TMW 1.1304	strain=TMW 1.1304		latest	Complete Genome	Major	Full	2011-09-06	ASM22532v1	Lehrstuhl fuer technische Mikrobiologie, Technische Universitaet Muenchen	GCA_000225325.1	identical	ftp://ftp.ncbi.nlm.nih.gov/genomes/all/GCF/000/225/325/GCF_000225325.1_ASM22532v1
GCF_000225345.1	PRJNA224116	SAMN02604129		representative genome	585394	301301	Roseburia hominis A2-183	strain=A2-183		latest	Complete Genome	Major	Full	2011-09-06	ASM22534v1	University of Aberdeen	GCA_000225345.1	identical	ftp://ftp.ncbi.nlm.nih.gov/genomes/all/GCF/000/225/345/GCF_000225345.1_ASM22534v1		assembly from type material
GCF_000225445.1	PRJNA224116	SAMN02604329		representative genome	1005090	9	Buchnera aphidicola str. Ak (Acyrthosiphon kondoi)	strain=Ak		latest	Complete Genome	Major	Full	2011-09-07	ASM22544v1	Yale University	GCA_000225445.1	identical	ftp://ftp.ncbi.nlm.nih.gov/genomes/all/GCF/000/225/445/GCF_000225445.1_ASM22544v1
GCF_000225465.1	PRJNA224116	SAMN02604330		representative genome	1005057	9	Buchnera aphidicola str. Ua (Uroleucon ambrosiae)	strain=Ua		latest	Complete Genome	Major	Full	2011-09-07	ASM22546v1	Yale University	GCA_000225465.1	identical	ftp://ftp.ncbi.nlm.nih.gov/genomes/all/GCF/000/225/465/GCF_000225465.1_ASM22546v1
GCF_000226095.1	PRJNA79339	SAMN00739435		representative genome	573729	78579	Thermothelomyces thermophilus ATCC 42464	strain=ATCC 42464		latest	Complete Genome	Major	Full	2011-09-16	ASM22609v1	DOE Joint Genome Institute	GCA_000226095.1	identical	ftp://ftp.ncbi.nlm.nih.gov/genomes/all/GCF/000/226/095/GCF_000226095.1_ASM22609v1
GCF_000226115.1	PRJNA79337	SAMN02744067		representative genome	578455	35720	Thielavia terrestris NRRL 8126	strain=NRRL 8126		latest	Complete Genome	Major	Full	2011-09-16	ASM22611v1	DOE Joint Genome Institute	GCA_000226115.1	identical	ftp://ftp.ncbi.nlm.nih.gov/genomes/all/GCF/000/226/115/GCF_000226115.1_ASM22611v1
GCF_000226295.1	PRJNA224116	SAMN02603950		representative genome	981222	458033	Chloracidobacterium thermophilum B	strain=B		latest	Complete Genome	Major	Full	2011-09-23	ASM22629v1	The Pennsylvania State University	GCA_000226295.1	identical	ftp://ftp.ncbi.nlm.nih.gov/genomes/all/GCF/000/226/295/GCF_000226295.1_ASM22629v1		assembly from type material
GCF_000226315.1	PRJNA224116	SAMN02604252		representative genome	856793	349221	Micavibrio aeruginosavorus ARL-13	strain=ARL-13		latest	Complete Genome	Major	Full	2011-09-23	ASM22631v1	University of Virginia, Department of Biology	GCA_000226315.1	identical	ftp://ftp.ncbi.nlm.nih.gov/genomes/all/GCF/000/226/315/GCF_000226315.1_ASM22631v1
GCF_000226565.1	PRJNA224116	SAMN02603857		representative genome	1085623	300231	Glaciecola nitratireducens FR1064	strain=FR1064		latest	Complete Genome	Major	Full	2011-09-28	ASM22656v1	Shandong University	GCA_000226565.1	identical	ftp://ftp.ncbi.nlm.nih.gov/genomes/all/GCF/000/226/565/GCF_000226565.1_ASM22656v1		assembly from type material
GCF_000226625.1	PRJNA224116	SAMN02602982		representative genome	1008459	84590	Taylorella asinigenitalis MCE3	strain=MCE3		latest	Complete Genome	Major	Full	2011-09-28	ASM22662v1	Anses	GCA_000226625.1	identical	ftp://ftp.ncbi.nlm.nih.gov/genomes/all/GCF/000/226/625/GCF_000226625.1_ASM22662v1
GCF_000226975.2	PRJNA224116	SAMN02470038		representative genome	358396	229731	Halobiforma lacisalsi AJ5	strain=AJ5		latest	Complete Genome	Major	Full	2017-01-23	ASM22697v3	College of Life Sciences, Zhejiang University	GCA_000226975.3	identical	ftp://ftp.ncbi.nlm.nih.gov/genomes/all/GCF/000/226/975/GCF_000226975.2_ASM22697v3		assembly from type material
GCF_000227665.2	PRJNA224116	SAMN02256538		representative genome	717772	92245	Thiomicrospira aerophila AL3	strain=AL3		latest	Complete Genome	Major	Full	2014-01-03	ASM22766v3	DOE Joint Genome Institute	GCA_000227665.3	identical	ftp://ftp.ncbi.nlm.nih.gov/genomes/all/GCF/000/227/665/GCF_000227665.2_ASM22766v3		assembly from type material
GCF_000227685.2	PRJNA224116	SAMN02256529		representative genome	713585	108010	Thioalkalivibrio paradoxus ARh 1	strain=ARh 1		latest	Complete Genome	Major	Full	2014-01-03	ASM22768v3	DOE Joint Genome Institute	GCA_000227685.3	identical	ftp://ftp.ncbi.nlm.nih.gov/genomes/all/GCF/000/227/685/GCF_000227685.2_ASM22768v3		assembly from type material
GCF_000227705.2	PRJNA224116	SAMN02261378		representative genome	717605	377615	Thermobacillus composti KWC4	strain=KWC4		latest	Complete Genome	Major	Full	2012-12-18	ASM22770v3	JGI	GCA_000227705.3	identical	ftp://ftp.ncbi.nlm.nih.gov/genomes/all/GCF/000/227/705/GCF_000227705.2_ASM22770v3		assembly from type material
GCF_000227745.2	PRJNA224116	SAMN02232062		representative genome	765911	73141	Thiocystis violascens DSM 198	strain=DSM 198		latest	Complete Genome	Major	Full	2012-06-08	ASM22774v3	DOE Joint Genome Institute	GCA_000227745.3	identical	ftp://ftp.ncbi.nlm.nih.gov/genomes/all/GCF/000/227/745/GCF_000227745.2_ASM22774v3		assembly from type material
GCF_000230275.1	PRJNA224116	SAMN02603738		representative genome	568816	187327	Acidaminococcus intestini RyC-MR95	strain=RyC-MR95		latest	Complete Genome	Major	Full	2011-10-07	ASM23027v1	Ramon y Cajal University Hospital of Madrid, Valencia University and Public Health Research Superior Center (CSISP) of Valencia's Goverment, Spain	GCA_000230275.1	identical	ftp://ftp.ncbi.nlm.nih.gov/genomes/all/GCF/000/230/275/GCF_000230275.1_ASM23027v1
GCF_000230555.1	PRJNA224116	SAMN02604343		representative genome	1082931	531813	Pelagibacterium halotolerans B2	strain=B2		latest	Complete Genome	Major	Full	2011-10-14	ASM23055v1	Zhejiang University	GCA_000230555.1	identical	ftp://ftp.ncbi.nlm.nih.gov/genomes/all/GCF/000/230/555/GCF_000230555.1_ASM23055v1		assembly from type material
GCF_000230695.2	PRJNA224116	SAMN02232048		representative genome	666685	666685	Rhodanobacter denitrificans	strain=2APBS1		latest	Complete Genome	Major	Full	2013-03-11	ASM23069v3	DOE Joint Genome Institute	GCA_000230695.3	identical	ftp://ftp.ncbi.nlm.nih.gov/genomes/all/GCF/000/230/695/GCF_000230695.2_ASM23069v3		assembly from type material
GCF_000230715.2	PRJNA224116	SAMN02232042		representative genome	797304	44930	Natronobacterium gregoryi SP2	strain=SP2		latest	Complete Genome	Major	Full	2012-12-10	ASM23071v3	DOE Joint Genome Institute	GCA_000230715.3	identical	ftp://ftp.ncbi.nlm.nih.gov/genomes/all/GCF/000/230/715/GCF_000230715.2_ASM23071v3		assembly from type material
GCF_000230735.2	PRJNA224116	SAMN02261373		representative genome	797303	69525	Natrinema pellirubrum DSM 15624	strain=DSM 15624		latest	Complete Genome	Major	Full	2012-12-27	ASM23073v3	JGI	GCA_000230735.3	identical	ftp://ftp.ncbi.nlm.nih.gov/genomes/all/GCF/000/230/735/GCF_000230735.2_ASM23073v3		assembly from type material
GCF_000230895.2	PRJNA224116	SAMN02261383		representative genome	710685	36814	Mycolicibacterium rhodesiae NBB3	strain=NBB3		latest	Complete Genome	Major	Full	2011-12-12	ASM23089v3	JGI	GCA_000230895.3	identical	ftp://ftp.ncbi.nlm.nih.gov/genomes/all/GCF/000/230/895/GCF_000230895.2_ASM23089v3
GCF_000231385.2	PRJNA224116	SAMN02261405		representative genome	768704	79209	Desulfosporosinus meridiei DSM 13257	strain=DSM 13257		latest	Complete Genome	Major	Full	2012-08-27	ASM23138v3	JGI	GCA_000231385.3	identical	ftp://ftp.ncbi.nlm.nih.gov/genomes/all/GCF/000/231/385/GCF_000231385.2_ASM23138v3		assembly from type material
GCF_000231405.2	PRJNA224116	SAMN02261393		representative genome	871968	142877	Desulfitobacterium metallireducens DSM 15288	strain=853-15A		latest	Complete Genome	Major	Full	2014-01-03	ASM23140v3	JGI	GCA_000231405.3	identical	ftp://ftp.ncbi.nlm.nih.gov/genomes/all/GCF/000/231/405/GCF_000231405.2_ASM23140v3		assembly from type material
GCF_000233715.2	PRJNA224116	SAMN02598540		representative genome	767817	102134	Desulfallas gibsoniae DSM 7213	strain=DSM 7213		latest	Complete Genome	Major	Full	2013-05-06	ASM23371v3	JGI	GCA_000233715.3	identical	ftp://ftp.ncbi.nlm.nih.gov/genomes/all/GCF/000/233/715/GCF_000233715.2_ASM23371v3		assembly from type material
GCF_000233775.1	PRJNA224116	SAMN02232060		representative genome	580340	336261	Thermovirga lienii DSM 17291	strain=DSM 17291		latest	Complete Genome	Major	Full	2011-11-03	ASM23377v1	DOE Joint Genome Institute	GCA_000233775.1	identical	ftp://ftp.ncbi.nlm.nih.gov/genomes/all/GCF/000/233/775/GCF_000233775.1_ASM23377v1		assembly from type material
GCF_000233915.3	PRJNA224116	SAMN02603133		representative genome	1045855	415229	Pseudoxanthomonas spadix BD-a59	strain=BD-a59		latest	Complete Genome	Major	Full	2011-11-17	ASM23391v4	Chung-Ang Univ.	GCA_000233915.4	identical	ftp://ftp.ncbi.nlm.nih.gov/genomes/all/GCF/000/233/915/GCF_000233915.3_ASM23391v4
GCF_000235405.2	PRJNA224116	SAMN02232021		representative genome	771875	93466	Fervidobacterium pennivorans DSM 9078	strain=DSM 9078		latest	Complete Genome	Major	Full	2012-04-02	ASM23540v3	DOE Joint Genome Institute	GCA_000235405.3	identical	ftp://ftp.ncbi.nlm.nih.gov/genomes/all/GCF/000/235/405/GCF_000235405.2_ASM23540v3		assembly from type material
GCF_000235565.1	PRJNA224116	SAMN02603883		representative genome	1110509	301375	Methanosaeta harundinacea 6Ac	strain=6Ac		latest	Complete Genome	Major	Full	2011-11-16	ASM23556v1	State Key Laboratory of Microbial Resources, Institute of Microbiology, Chinese Academy of Sciences	GCA_000235565.1	identical	ftp://ftp.ncbi.nlm.nih.gov/genomes/all/GCF/000/235/565/GCF_000235565.1_ASM23556v1
GCF_000235605.1	PRJNA224116	SAMN02261424		representative genome	768706	1563	Desulfosporosinus orientis DSM 765	strain=DSM 765		latest	Complete Genome	Major	Full	2011-11-16	ASM23560v1	JGI	GCA_000235605.1	identical	ftp://ftp.ncbi.nlm.nih.gov/genomes/all/GCF/000/235/605/GCF_000235605.1_ASM23560v1		assembly from type material
GCF_000236405.1	PRJNA224116	SAMN02604251		representative genome	1075399	164514	Blattabacterium sp. (Cryptocercus punctulatus) str. Cpu	strain=Cpu		latest	Complete Genome	Major	Full	2011-11-29	ASM23640v1	University of Valencia	GCA_000236405.1	identical	ftp://ftp.ncbi.nlm.nih.gov/genomes/all/GCF/000/236/405/GCF_000236405.1_ASM23640v1
GCF_000236665.1	PRJNA224116	SAMN02232011		representative genome	640081	146939	Azospira oryzae PS	strain=PS		latest	Complete Genome	Major	Full	2011-12-05	ASM23666v1	US DOE Joint Genome Institute (JGI-PGF)	GCA_000236665.1	identical	ftp://ftp.ncbi.nlm.nih.gov/genomes/all/GCF/000/236/665/GCF_000236665.1_ASM23666v1		assembly from synonym type material
GCF_000236685.1	PRJNA224116	SAMN02261363		representative genome	158190	1131707	Sphaerochaeta pleomorpha str. Grapes	strain=Grapes		latest	Complete Genome	Major	Full	2011-12-05	ASM23668v1	JGI	GCA_000236685.1	identical	ftp://ftp.ncbi.nlm.nih.gov/genomes/all/GCF/000/236/685/GCF_000236685.1_ASM23668v1		assembly from type material
GCF_000236705.1	PRJNA224116	SAMN02261417		representative genome	926562	253245	Owenweeksia hongkongensis DSM 17368	strain=DSM 17368		latest	Complete Genome	Major	Full	2011-12-05	ASM23670v1	JGI	GCA_000236705.1	identical	ftp://ftp.ncbi.nlm.nih.gov/genomes/all/GCF/000/236/705/GCF_000236705.1_ASM23670v1		assembly from type material
GCF_000237065.1	PRJNA224116	SAMN02604099		representative genome	1114970	294	Pseudomonas fluorescens F113	strain=F113		latest	Complete Genome	Major	Full	2011-12-09	ASM23706v1	Universidad Aut√≥noma de Madrid	GCA_000237065.1	identical	ftp://ftp.ncbi.nlm.nih.gov/genomes/all/GCF/000/237/065/GCF_000237065.1_ASM23706v1
GCF_000237085.1	PRJNA224116	SAMN02261428		representative genome	720554	288965	Hungateiclostridium clariflavum DSM 19732	strain=DSM 19732		latest	Complete Genome	Major	Full	2011-12-12	ASM23708v1	JGI	GCA_000237085.1	identical	ftp://ftp.ncbi.nlm.nih.gov/genomes/all/GCF/000/237/085/GCF_000237085.1_ASM23708v1		assembly from type material
GCF_000237205.1	PRJNA224116	SAMEA2272380		representative genome	331113	83561	Simkania negevensis Z	strain=Z		latest	Complete Genome	Major	Full	2011-06-21	ASM23720v1	University of Vienna, Dept. of Microbial Ecology	GCA_000237205.1	identical	ftp://ftp.ncbi.nlm.nih.gov/genomes/all/GCF/000/237/205/GCF_000237205.1_ASM23720v1		assembly from type material
GCF_000237865.1	PRJNA224116	SAMEA2272799		representative genome	768065	293091	Haloquadratum walsbyi C23			latest	Complete Genome	Major	Full	2011-05-31	ASM23786v1	Max-Planck-Institute of Biochemistry	GCA_000237865.1	identical	ftp://ftp.ncbi.nlm.nih.gov/genomes/all/GCF/000/237/865/GCF_000237865.1_ASM23786v1		assembly from type material
GCF_000237995.1	PRJNA224116	SAMN02604240		representative genome	701521	187452	Pediococcus claussenii ATCC BAA-344	strain=ATCC BAA-344		latest	Complete Genome	Major	Full	2012-03-15	ASM23799v2	University of Saskatchewan	GCA_000237995.2	identical	ftp://ftp.ncbi.nlm.nih.gov/genomes/all/GCF/000/237/995/GCF_000237995.1_ASM23799v2		assembly from type material
GCF_000238215.1	PRJNA224116	SAMN02604009		representative genome	203275	28112	Tannerella forsythia 92A2	strain=92A2		latest	Complete Genome	Major	Full	2011-12-15	ASM23821v1	TIGR	GCA_000238215.1	identical	ftp://ftp.ncbi.nlm.nih.gov/genomes/all/GCF/000/238/215/GCF_000238215.1_ASM23821v1
GCF_000238255.3	PRJNA224116	SAMN02470926		representative genome	1117319	298657	Pseudoalteromonas spongiae UST010723-006	strain=UST010723-006		latest	Complete Genome	Major	Full	2017-09-18	ASM23825v4	Shandong University	GCA_000238255.4	identical	ftp://ftp.ncbi.nlm.nih.gov/genomes/all/GCF/000/238/255/GCF_000238255.3_ASM23825v4		assembly from type material
GCF_000240075.2	PRJNA224116	SAMN02603612		representative genome	1041826	996	Flavobacterium columnare ATCC 49512	strain=ATCC 49512		latest	Complete Genome	Major	Full	2012-01-19	ASM24007v2	Mississippi State University	GCA_000240075.2	identical	ftp://ftp.ncbi.nlm.nih.gov/genomes/all/GCF/000/240/075/GCF_000240075.2_ASM24007v2
GCF_000240165.1	PRJNA224116	SAMN02603879		representative genome	1003195	29303	Streptomyces cattleya NRRL 8057 = DSM 46488	strain=DSM 46488		latest	Complete Genome	Major	Full	2011-12-27	ASM24016v1	State Key Laboratory of Microbial Metabolism, Shanghai Jiaotong University	GCA_000240165.1	identical	ftp://ftp.ncbi.nlm.nih.gov/genomes/all/GCF/000/240/165/GCF_000240165.1_ASM24016v1
GCF_000242255.2	PRJNA224116	SAMN02261415		representative genome	767434	81475	Frateuria aurantia DSM 6220	strain=DSM 6220		latest	Complete Genome	Major	Full	2012-03-02	ASM24225v3	JGI	GCA_000242255.3	identical	ftp://ftp.ncbi.nlm.nih.gov/genomes/all/GCF/000/242/255/GCF_000242255.2_ASM24225v3		assembly from type material
GCF_000242455.2	PRJNA224116	SAMN02232051		representative genome	886293	466153	Singulisphaera acidiphila DSM 18658	strain=DSM 18658		latest	Complete Genome	Major	Full	2012-12-17	ASM24245v3	DOE Joint Genome Institute	GCA_000242455.3	identical	ftp://ftp.ncbi.nlm.nih.gov/genomes/all/GCF/000/242/455/GCF_000242455.2_ASM24245v3		assembly from type material
GCF_000242595.2	PRJNA224116	SAMN02232053		representative genome	889378	46355	Spirochaeta africana DSM 8902	strain=DSM 8902		latest	Complete Genome	Major	Full	2012-04-02	ASM24259v3	DOE Joint Genome Institute	GCA_000242595.3	identical	ftp://ftp.ncbi.nlm.nih.gov/genomes/all/GCF/000/242/595/GCF_000242595.2_ASM24259v3		assembly from type material
GCF_000242635.2	PRJNA224116	SAMN02232052		representative genome	929556	995	Solitalea canadensis DSM 3403	strain=DSM 3403		latest	Complete Genome	Major	Full	2012-03-08	ASM24263v3	DOE Joint Genome Institute	GCA_000242635.3	identical	ftp://ftp.ncbi.nlm.nih.gov/genomes/all/GCF/000/242/635/GCF_000242635.2_ASM24263v3		assembly from type material
GCF_000243115.2	PRJNA224116	SAMN02261390		representative genome	929713	446683	Niabella soli DSM 19437	strain=JS13-8; DSM 19437		latest	Complete Genome	Major	Full	2014-01-03	ASM24311v3	JGI	GCA_000243115.3	identical	ftp://ftp.ncbi.nlm.nih.gov/genomes/all/GCF/000/243/115/GCF_000243115.2_ASM24311v3		assembly from type material
GCF_000243135.2	PRJNA224116	SAMN02232012		representative genome	871963	233055	Desulfitobacterium dichloroeliminans LMG P-21439	strain=LMG P-21439		latest	Complete Genome	Major	Full	2012-12-19	ASM24313v3	DOE Joint Genome Institute	GCA_000243135.3	identical	ftp://ftp.ncbi.nlm.nih.gov/genomes/all/GCF/000/243/135/GCF_000243135.2_ASM24313v3
GCF_000243155.2	PRJNA224116	SAMN02261389		representative genome	756499	36854	Desulfitobacterium dehalogenans ATCC 51507	strain=ATCC 51507		latest	Complete Genome	Major	Full	2012-06-11	ASM24315v3	JGI	GCA_000243155.3	identical	ftp://ftp.ncbi.nlm.nih.gov/genomes/all/GCF/000/243/155/GCF_000243155.2_ASM24315v3		assembly from type material
GCF_000246855.1	PRJNA224116	SAMN02232043		representative genome	700598	354356	Niastella koreensis GR20-10	strain=GR20-10		latest	Complete Genome	Major	Full	2011-12-14	ASM24685v1	DOE Joint Genome Institute	GCA_000246855.1	identical	ftp://ftp.ncbi.nlm.nih.gov/genomes/all/GCF/000/246/855/GCF_000246855.1_ASM24685v1		assembly from type material
GCF_000246985.2	PRJNA224116	SAMN02603679		representative genome	523849	2265	Thermococcus litoralis DSM 5473	strain=DSM 5473		latest	Complete Genome	Major	Full	2013-08-13	ASM24698v3	New England Biolabs, Inc.	GCA_000246985.3	identical	ftp://ftp.ncbi.nlm.nih.gov/genomes/all/GCF/000/246/985/GCF_000246985.2_ASM24698v3		assembly from type material
GCF_000247565.1	PRJNA224116	SAMN02604338		representative genome	1142511	51229	Wigglesworthia glossinidia endosymbiont of Glossina morsitans morsitans (Yale colony)			latest	Complete Genome	Major	Full	2012-02-10	ASM24756v1	Yale University School of Public Health	GCA_000247565.1	identical	ftp://ftp.ncbi.nlm.nih.gov/genomes/all/GCF/000/247/565/GCF_000247565.1_ASM24756v1
GCF_000247605.1	PRJNA224116	SAMN02603267		representative genome	931626	33952	Acetobacterium woodii DSM 1030	strain=DSM 1030		latest	Complete Genome	Major	Full	2012-02-14	ASM24760v1	Georg-August-University Goettingen	GCA_000247605.1	identical	ftp://ftp.ncbi.nlm.nih.gov/genomes/all/GCF/000/247/605/GCF_000247605.1_ASM24760v1		assembly from type material
GCF_000247715.1	PRJNA224116	SAMN02603285		representative genome	1112204	84595	Gordonia polyisoprenivorans VH2	strain=VH2		latest	Complete Genome	Major	Full	2012-02-16	ASM24771v1	Goettingen Genomics Laboratory	GCA_000247715.1	identical	ftp://ftp.ncbi.nlm.nih.gov/genomes/all/GCF/000/247/715/GCF_000247715.1_ASM24771v1
GCF_000248095.2	PRJNA224116	SAMN02470226		representative genome	1130798	97478	Lactobacillus mucosae LM1	strain=LM1		latest	Complete Genome	Major	Full	2015-03-11	ASM24809v3	chunlab Inc.	GCA_000248095.3	identical	ftp://ftp.ncbi.nlm.nih.gov/genomes/all/GCF/000/248/095/GCF_000248095.2_ASM24809v3
GCF_000250635.1	PRJNA224116	SAMN02602989		representative genome	984262	1008	Saprospira grandis str. Lewin	strain=Lewin		latest	Complete Genome	Major	Full	2012-02-27	ASM25063v1	ASGPB, University of Hawaii at Manoa	GCA_000250635.1	identical	ftp://ftp.ncbi.nlm.nih.gov/genomes/all/GCF/000/250/635/GCF_000250635.1_ASM25063v1		assembly from proxytype material
GCF_000250655.1	PRJNA224116	SAMN02603387		representative genome	1116391	61624	Paenibacillus mucilaginosus 3016	strain=3016		latest	Complete Genome	Major	Full	2012-02-27	ASM25065v1	Institute of Agricultural Resources and Regional Planning,	GCA_000250655.1	identical	ftp://ftp.ncbi.nlm.nih.gov/genomes/all/GCF/000/250/655/GCF_000250655.1_ASM25065v1
GCF_000250675.2	PRJNA224116	SAMN02603853		representative genome	1133849	37326	Nocardia brasiliensis ATCC 700358	strain=HUJEG-1		latest	Complete Genome	Major	Full	2012-09-28	ASM25067v3	Servicio de Dermatolog√≠a, Hospital Universitario, U.A.N.L., Monterrey, N.L., M√©xico	GCA_000250675.3	identical	ftp://ftp.ncbi.nlm.nih.gov/genomes/all/GCF/000/250/675/GCF_000250675.2_ASM25067v3
GCF_000251105.1	PRJNA224116	SAMN02603117		representative genome	1041930	1175444	Methanocella conradii HZ254	strain=HZ254		latest	Complete Genome	Major	Full	2012-03-07	ASM25110v1	China Agricultural University	GCA_000251105.1	identical	ftp://ftp.ncbi.nlm.nih.gov/genomes/all/GCF/000/251/105/GCF_000251105.1_ASM25110v1		assembly from type material
GCF_000252445.1	PRJNA224116	SAMN02603039		representative genome	745776	502394	Deinococcus gobiensis I-0	strain=I-0		latest	Complete Genome	Major	Full	2012-03-12	ASM25244v1	Biotechnology Research Institute, the Chinese Academy of Agricultural Sciences	GCA_000252445.1	identical	ftp://ftp.ncbi.nlm.nih.gov/genomes/all/GCF/000/252/445/GCF_000252445.1_ASM25244v1		assembly from type material
GCF_000252855.1	PRJNA224116	SAMN02602991		representative genome	693978	34085	Riemerella anatipestifer ATCC 11845 = DSM 15868	strain=ATCC 11845		latest	Complete Genome	Major	Full	2012-03-15	ASM25285v1	Avian Disease Centre of the College of Veterinary Medicine, Sichuan Agricultural University	GCA_000252855.1	identical	ftp://ftp.ncbi.nlm.nih.gov/genomes/all/GCF/000/252/855/GCF_000252855.1_ASM25285v1		assembly from type material
GCF_000253015.1	PRJNA224116	SAMEA2272739		representative genome	696125	56426	Bartonella clarridgeiae 73	strain=73		latest	Complete Genome	Major	Full	2011-01-17	ASM25301v1	Focal area Infection Biology, Biozentrum, University of Basel, Switzerland	GCA_000253015.1	identical	ftp://ftp.ncbi.nlm.nih.gov/genomes/all/GCF/000/253/015/GCF_000253015.1_ASM25301v1
GCF_000253035.1	PRJNA224116	SAMEA2272163		representative genome	765952	83552	Parachlamydia acanthamoebae UV-7	strain=UV-7		latest	Complete Genome	Major	Full	2011-06-21	ASM25303v1	University of Vienna, Dept. of Microbial Ecology	GCA_000253035.1	identical	ftp://ftp.ncbi.nlm.nih.gov/genomes/all/GCF/000/253/035/GCF_000253035.1_ASM25303v1
GCF_000253275.1	PRJNA224116	SAMEA3138411		representative genome	1034807	55197	Flavobacterium branchiophilum FL-15	strain=FL-15		latest	Complete Genome	Major	Full	2011-09-06	ASM25327v1	Institut National de la Recherche Agronomique (INRA)	GCA_000253275.1	identical	ftp://ftp.ncbi.nlm.nih.gov/genomes/all/GCF/000/253/275/GCF_000253275.1_ASM25327v1
GCF_000253395.1	PRJNA224116	SAMEA2272807		representative genome	1051074	1308	Streptococcus thermophilus JIM 8232	strain=JIM 8232		latest	Complete Genome	Major	Full	2011-07-04	ASM25339v1	Institut National de la Recherche Agronomique (INRA)	GCA_000253395.1	identical	ftp://ftp.ncbi.nlm.nih.gov/genomes/all/GCF/000/253/395/GCF_000253395.1_ASM25339v1
GCF_000255115.2	PRJNA224116	SAMN02232014		representative genome	646529	885581	Desulfosporosinus acidiphilus SJ4	strain=SJ4		latest	Complete Genome	Major	Full	2012-06-15	ASM25511v3	DOE Joint Genome Institute	GCA_000255115.3	identical	ftp://ftp.ncbi.nlm.nih.gov/genomes/all/GCF/000/255/115/GCF_000255115.2_ASM25511v3		assembly from type material
GCF_000255135.1	PRJNA224116	SAMN02261422		representative genome	443254	149715	Marinitoga piezophila KA3	strain=KA3		latest	Complete Genome	Major	Full	2012-01-13	ASM25513v1	JGI	GCA_000255135.1	identical	ftp://ftp.ncbi.nlm.nih.gov/genomes/all/GCF/000/255/135/GCF_000255135.1_ASM25513v1		assembly from type material
GCF_000255295.1	PRJNA224116	SAMN02603593		representative genome	1144275	184914	Corallococcus coralloides DSM 2259	strain=DSM 2259		latest	Complete Genome	Major	Full	2012-03-20	ASM25529v1	Max Planck Institute for Terrestrial Microbiology	GCA_000255295.1	identical	ftp://ftp.ncbi.nlm.nih.gov/genomes/all/GCF/000/255/295/GCF_000255295.1_ASM25529v1		assembly from type material
GCF_000255535.1	PRJNA224116	SAMN02603118		representative genome	1151116	34038	Rahnella aquatilis HX2	strain=HX2		latest	Complete Genome	Major	Full	2012-03-21	ASM25553v1	CHINA AGRICULTURAL UNIVERSITY	GCA_000255535.1	identical	ftp://ftp.ncbi.nlm.nih.gov/genomes/all/GCF/000/255/535/GCF_000255535.1_ASM25553v1
GCF_000258405.1	PRJNA224116	SAMN02603949		representative genome	945713	591197	Ignavibacterium album JCM 16511	strain=JCM 16511		latest	Complete Genome	Major	Full	2012-04-10	ASM25840v1	The Pennsylvania State University	GCA_000258405.1	identical	ftp://ftp.ncbi.nlm.nih.gov/genomes/all/GCF/000/258/405/GCF_000258405.1_ASM25840v1		assembly from type material
GCF_000259175.1	PRJNA224116	SAMN02604304		representative genome	1157951	588	Providencia stuartii MRSN 2154	strain=MRSN 2154		latest	Complete Genome	Major	Full	2012-04-18	ASM25917v1	Walter Reed Army Institute of Research	GCA_000259175.1	identical	ftp://ftp.ncbi.nlm.nih.gov/genomes/all/GCF/000/259/175/GCF_000259175.1_ASM25917v1
GCF_000259255.1	PRJNA224116	SAMN02603199		representative genome	182217	138563	Helicobacter cetorum MIT 00-7128	strain=MIT 00-7128		latest	Complete Genome	Major	Full	2012-04-19	ASM25925v1	Dept. Molec. Microbiology, Washington University Medical School in Saint Louis	GCA_000259255.1	identical	ftp://ftp.ncbi.nlm.nih.gov/genomes/all/GCF/000/259/255/GCF_000259255.1_ASM25925v1
GCF_000259275.1	PRJNA224116	SAMN02603198		representative genome	1163745	138563	Helicobacter cetorum MIT 99-5656	strain=MIT 99-5656		latest	Complete Genome	Major	Full	2012-04-19	ASM25927v1	Dept. Molec. Microbiology, Washington University Medical School in Saint Louis	GCA_000259275.1	identical	ftp://ftp.ncbi.nlm.nih.gov/genomes/all/GCF/000/259/275/GCF_000259275.1_ASM25927v1		assembly from type material
GCF_000260965.1	PRJNA224116	SAMN02603343		representative genome	754477	754477	Methylophaga frappieri	strain=JAM7		latest	Complete Genome	Major	Full	2012-05-03	ASM26096v1	INRS-Institut Armand-Frappier	GCA_000260965.1	identical	ftp://ftp.ncbi.nlm.nih.gov/genomes/all/GCF/000/260/965/GCF_000260965.1_ASM26096v1		assembly from type material
GCF_000260985.4	PRJNA224116	SAMN02603342		representative genome	754476	754476	Methylophaga nitratireducenticrescens	strain=JAM1		latest	Complete Genome	Major	Full	2017-06-27	ASM26098v3	INRS-Institut Armand-Frappier	GCA_000260985.3	identical	ftp://ftp.ncbi.nlm.nih.gov/genomes/all/GCF/000/260/985/GCF_000260985.4_ASM26098v3		assembly from type material
GCF_000262305.1	PRJNA224116	SAMN02603253		representative genome	630626	563	Shimwellia blattae DSM 4481 = NBRC 105725	strain=DSM 4481		latest	Complete Genome	Major	Full	2012-05-10	ASM26230v1	Georg August University Goettingen	GCA_000262305.1	identical	ftp://ftp.ncbi.nlm.nih.gov/genomes/all/GCF/000/262/305/GCF_000262305.1_ASM26230v1		assembly from type material
GCF_000264455.2	PRJNA224116	SAMN02603926		representative genome	1110502	171437	Tistrella mobilis KA081020-065	strain=KA081020-065		latest	Complete Genome	Major	Full	2012-12-05	ASM26445v2	the Hong Kong University of Science and Technology	GCA_000264455.2	identical	ftp://ftp.ncbi.nlm.nih.gov/genomes/all/GCF/000/264/455/GCF_000264455.2_ASM26445v2
GCF_000264495.1	PRJNA224116	SAMN02603096		representative genome	1184251	1200300	Thermogladius calderae 1633	strain=1633		latest	Complete Genome	Major	Full	2012-05-25	ASM26449v1	Centre Bioengineering RAS	GCA_000264495.1	identical	ftp://ftp.ncbi.nlm.nih.gov/genomes/all/GCF/000/264/495/GCF_000264495.1_ASM26449v1		assembly from type material
GCF_000264765.2	PRJNA224116	SAMN02469761		representative genome	667120	1821960	Edwardsiella anguillarum ET080813	strain=ET080813		latest	Complete Genome	Major	Full	2014-08-12	ASM26476v2	State Key Laboratory of Bioreactor Engineering, East China University of Science and Technology	GCA_000264765.2	identical	ftp://ftp.ncbi.nlm.nih.gov/genomes/all/GCF/000/264/765/GCF_000264765.2_ASM26476v2		assembly from type material
GCF_000265295.1	PRJNA224116	SAMN02232056		representative genome	760154	44674	Sulfurospirillum barnesii SES-3	strain=SES-3		latest	Complete Genome	Major	Full	2012-06-07	ASM26529v1	DOE Joint Genome Institute	GCA_000265295.1	identical	ftp://ftp.ncbi.nlm.nih.gov/genomes/all/GCF/000/265/295/GCF_000265295.1_ASM26529v1		assembly from type material
GCF_000265365.1	PRJNA224116	SAMN02232007		representative genome	679935	214856	Alistipes finegoldii DSM 17242	strain=DSM 17242		latest	Complete Genome	Major	Full	2012-06-08	ASM26536v1	DOE Joint Genome Institute	GCA_000265365.1	identical	ftp://ftp.ncbi.nlm.nih.gov/genomes/all/GCF/000/265/365/GCF_000265365.1_ASM26536v1		assembly from type material
GCF_000265385.1	PRJNA224116	SAMN02232006		representative genome	746697	101385	Aequorivita sublithincola DSM 14238	strain=DSM 14238		latest	Complete Genome	Major	Full	2012-06-08	ASM26538v1	DOE Joint Genome Institute	GCA_000265385.1	identical	ftp://ftp.ncbi.nlm.nih.gov/genomes/all/GCF/000/265/385/GCF_000265385.1_ASM26538v1		assembly from type material
GCF_000265405.1	PRJNA224116	SAMN02232009		representative genome	866536	232259	Belliella baltica DSM 15883	strain=DSM 15883		latest	Complete Genome	Major	Full	2012-06-08	ASM26540v1	DOE Joint Genome Institute	GCA_000265405.1	identical	ftp://ftp.ncbi.nlm.nih.gov/genomes/all/GCF/000/265/405/GCF_000265405.1_ASM26540v1		assembly from type material
GCF_000265425.1	PRJNA224116	SAMN02261411		representative genome	926566	392734	Terriglobus roseus DSM 18391	strain=DSM 18391		latest	Complete Genome	Major	Full	2012-06-08	ASM26542v1	JGI	GCA_000265425.1	identical	ftp://ftp.ncbi.nlm.nih.gov/genomes/all/GCF/000/265/425/GCF_000265425.1_ASM26542v1		assembly from type material
GCF_000265465.1	PRJNA224116	SAMN02261366		representative genome	867902	28251	Ornithobacterium rhinotracheale DSM 15997	strain=DSM 15997		latest	Complete Genome	Major	Full	2012-06-11	ASM26546v1	JGI	GCA_000265465.1	identical	ftp://ftp.ncbi.nlm.nih.gov/genomes/all/GCF/000/265/465/GCF_000265465.1_ASM26546v1		assembly from type material
GCF_000265505.1	PRJNA224116	SAMN02261370		representative genome	880071	999	Bernardetia litoralis DSM 6794	strain=DSM 6794		latest	Complete Genome	Major	Full	2012-06-11	ASM26550v1	JGI	GCA_000265505.1	identical	ftp://ftp.ncbi.nlm.nih.gov/genomes/all/GCF/000/265/505/GCF_000265505.1_ASM26550v1		assembly from type material
GCF_000265525.1	PRJNA224116	SAMN02603492		representative genome	163003	163003	Thermococcus cleftensis	strain=CL1		latest	Complete Genome	Major	Full	2012-06-11	ASM26552v1	Kyung Hee University	GCA_000265525.1	identical	ftp://ftp.ncbi.nlm.nih.gov/genomes/all/GCF/000/265/525/GCF_000265525.1_ASM26552v1		assembly from type material
GCF_000266885.1	PRJNA224116	SAMN02232065		representative genome	869212	29510	Turneriella parva DSM 21527	strain=DSM 21527		latest	Complete Genome	Major	Full	2012-06-12	ASM26688v1	DOE Joint Genome Institute	GCA_000266885.1	identical	ftp://ftp.ncbi.nlm.nih.gov/genomes/all/GCF/000/266/885/GCF_000266885.1_ASM26688v1		assembly from type material
GCF_000266905.1	PRJNA224116	SAMN02261374		representative genome	710421	1800	Mycolicibacterium chubuense NBB4	strain=NBB4		latest	Complete Genome	Major	Full	2012-06-12	ASM26690v1	JGI	GCA_000266905.1	identical	ftp://ftp.ncbi.nlm.nih.gov/genomes/all/GCF/000/266/905/GCF_000266905.1_ASM26690v1
GCF_000266925.1	PRJNA224116	SAMN02261375		representative genome	891968	97477	Acetomicrobium mobile DSM 13181	strain=DSM 13181		latest	Complete Genome	Major	Full	2012-06-12	ASM26692v1	JGI	GCA_000266925.1	identical	ftp://ftp.ncbi.nlm.nih.gov/genomes/all/GCF/000/266/925/GCF_000266925.1_ASM26692v1		assembly from type material
GCF_000266945.1	PRJNA224116	SAMN02232013		representative genome	706587	2358	Desulfomonile tiedjei DSM 6799	strain=DSM 6799		latest	Complete Genome	Major	Full	2012-06-12	ASM26694v1	DOE Joint Genome Institute	GCA_000266945.1	identical	ftp://ftp.ncbi.nlm.nih.gov/genomes/all/GCF/000/266/945/GCF_000266945.1_ASM26694v1		assembly from type material
GCF_000269925.1	PRJNA224116	SAMD00060911		representative genome	420889	1363	Lactococcus garvieae ATCC 49156	strain=ATCC 49156		latest	Complete Genome	Major	Full	2011-08-09	ASM26992v1	Kitasato Institute for Life Sciences	GCA_000269925.1	identical	ftp://ftp.ncbi.nlm.nih.gov/genomes/all/GCF/000/269/925/GCF_000269925.1_ASM26992v1		assembly from type material
GCF_000269985.1	PRJNA224116	SAMD00060928		representative genome	452652	2066	Kitasatospora setae KM-6054	strain=KM-6054		latest	Complete Genome	Major	Full	2010-11-11	ASM26998v1	NITE	GCA_000269985.1	identical	ftp://ftp.ncbi.nlm.nih.gov/genomes/all/GCF/000/269/985/GCF_000269985.1_ASM26998v1		assembly from type material
GCF_000270085.1	PRJNA224116	SAMD00060966		representative genome	650150	1648	Erysipelothrix rhusiopathiae str. Fujisawa	strain=Fujisawa		latest	Complete Genome	Major	Full	2011-05-30	ASM27008v1	National Institute of Animal Health (Japan)	GCA_000270085.1	identical	ftp://ftp.ncbi.nlm.nih.gov/genomes/all/GCF/000/270/085/GCF_000270085.1_ASM27008v1
GCF_000270245.1	PRJNA224116	SAMD00061117		representative genome	1032480	29405	Microlunatus phosphovorus NM-1	strain=NM-1		latest	Complete Genome	Major	Full	2011-06-01	ASM27024v1	National Institute of Technology and Evaluation	GCA_000270245.1	identical	ftp://ftp.ncbi.nlm.nih.gov/genomes/all/GCF/000/270/245/GCF_000270245.1_ASM27024v1		assembly from type material
GCF_000271405.2	PRJNA224116	SAMN02604142		representative genome	768486	1354	Enterococcus hirae ATCC 9790	strain=ATCC 9790		latest	Complete Genome	Major	Full	2012-06-20	ASM27140v2	University of Bern	GCA_000271405.2	identical	ftp://ftp.ncbi.nlm.nih.gov/genomes/all/GCF/000/271/405/GCF_000271405.2_ASM27140v2		assembly from type material
GCF_000271665.2	PRJNA224116	SAMN00996448		representative genome	1192197	365349	Pelosinus fermentans JBW45	strain=JBW45		latest	Complete Genome	Major	Full	2015-03-02	ASM27166v2	Oak Ridge National Laboratory	GCA_000271665.2	identical	ftp://ftp.ncbi.nlm.nih.gov/genomes/all/GCF/000/271/665/GCF_000271665.2_ASM27166v2
GCF_000276685.1	PRJNA224116	SAMN02604145		representative genome	743973	29575	Taylorella equigenitalis ATCC 35865	strain=ATCC 35865		latest	Complete Genome	Major	Full	2012-07-09	ASM27668v1	University of Bristol	GCA_000276685.1	identical	ftp://ftp.ncbi.nlm.nih.gov/genomes/all/GCF/000/276/685/GCF_000276685.1_ASM27668v1		assembly from type material
GCF_000277125.1	PRJNA224116	SAMN02603186		representative genome	487521	1767	Mycobacterium intracellulare ATCC 13950	strain=ATCC 13950		latest	Complete Genome	Major	Full	2012-02-29	ASM27712v1	Department of Microbiology and Immunology, Seoul National University	GCA_000277125.1	identical	ftp://ftp.ncbi.nlm.nih.gov/genomes/all/GCF/000/277/125/GCF_000277125.1_ASM27712v1		assembly from type material
GCF_000277715.1	PRJNA224116	SAMN02415616		representative genome	767029	1750	Pseudopropionibacterium propionicum F0230a	strain=F0230a		latest	Complete Genome	Major	Full	2012-07-12	ASM27771v1	J. Craig Venter Institute	GCA_000277715.1	identical	ftp://ftp.ncbi.nlm.nih.gov/genomes/all/GCF/000/277/715/GCF_000277715.1_ASM27771v1
GCF_000277795.1	PRJNA224116	SAMN02603734		representative genome	1197325	65123	Mycoplasma wenyonii str. Massachusetts	strain=Massachusetts		latest	Complete Genome	Major	Full	2012-07-16	ASM27779v1	Purdue University	GCA_000277795.1	identical	ftp://ftp.ncbi.nlm.nih.gov/genomes/all/GCF/000/277/795/GCF_000277795.1_ASM27779v1		assembly designated as reftype
GCF_000279145.1	PRJNA224116	SAMN02603097		representative genome	1191523	1134405	Melioribacter roseus P3M-2	strain=P3M-2		latest	Complete Genome	Major	Full	2012-07-18	ASM27914v1	Centre Bioengineering RAS	GCA_000279145.1	identical	ftp://ftp.ncbi.nlm.nih.gov/genomes/all/GCF/000/279/145/GCF_000279145.1_ASM27914v1		assembly from type material
GCF_000281175.1	PRJNA224116	SAMD00061033		representative genome	926550	133453	Caldilinea aerophila DSM 14535 = NBRC 104270	strain=DSM 14535		latest	Complete Genome	Major	Full	2012-03-28	ASM28117v1	National Institute of Technology and Evaluation	GCA_000281175.1	identical	ftp://ftp.ncbi.nlm.nih.gov/genomes/all/GCF/000/281/175/GCF_000281175.1_ASM28117v1		assembly from type material
GCF_000283575.1	PRJNA224116	SAMD00061111		representative genome	693746	351091	Oscillibacter valericigenes Sjm18-20	strain=Sjm18-20		latest	Complete Genome	Major	Full	2011-09-30	ASM28357v1	National Institute of Technology and Evaluation	GCA_000283575.1	identical	ftp://ftp.ncbi.nlm.nih.gov/genomes/all/GCF/000/283/575/GCF_000283575.1_ASM28357v1		assembly from type material
GCF_000283595.1	PRJNA224116	SAMD00060967		representative genome	652620	35790	Rickettsia japonica YH	strain=YH		latest	Complete Genome	Major	Full	2011-09-30	ASM28359v1	Yamaguchi University	GCA_000283595.1	identical	ftp://ftp.ncbi.nlm.nih.gov/genomes/all/GCF/000/283/595/GCF_000283595.1_ASM28359v1		assembly from type material
GCF_000283615.1	PRJNA224116	SAMD00061109		representative genome	945021	51669	Tetragenococcus halophilus NBRC 12172	strain=NBRC 12172		latest	Complete Genome	Major	Full	2011-09-30	ASM28361v1	National Institute of Technology and Evaluation	GCA_000283615.1	identical	ftp://ftp.ncbi.nlm.nih.gov/genomes/all/GCF/000/283/615/GCF_000283615.1_ASM28361v1
GCF_000284015.1	PRJNA224116	SAMEA2272314		representative genome	1146883	138336	Blastococcus saxobsidens DD2	strain=DD2		latest	Complete Genome	Major	Full	2012-02-28	ASM28401v1	CEA-IG-Genoscope	GCA_000284015.1	identical	ftp://ftp.ncbi.nlm.nih.gov/genomes/all/GCF/000/284/015/GCF_000284015.1_ASM28401v1
GCF_000284035.1	PRJNA224116	SAMEA2272802		representative genome	1127134	135487	Nocardia cyriacigeorgica GUH-2	strain=GUH-2		latest	Complete Genome	Major	Full	2012-02-07	ASM28403v1	CEA/DSV/IG/Genoscope	GCA_000284035.1	identical	ftp://ftp.ncbi.nlm.nih.gov/genomes/all/GCF/000/284/035/GCF_000284035.1_ASM28403v1
GCF_000284075.1	PRJNA224116	SAMN02603560		representative genome	1105113	33992	Rickettsia rhipicephali str. 3-7-female6-CWPP	strain=3-7-female6-CWPP		latest	Complete Genome	Major	Full	2012-03-01	ASM28407v1	Los Alamos National Laboratory	GCA_000284075.1	identical	ftp://ftp.ncbi.nlm.nih.gov/genomes/all/GCF/000/284/075/GCF_000284075.1_ASM28407v1		assembly from type material
GCF_000284095.1	PRJNA224116	SAMD00061115		representative genome	927704	971	Selenomonas ruminantium subsp. lactilytica TAM6421	strain=TAM6421		latest	Complete Genome	Major	Full	2012-03-28	ASM28409v1	National Institute of Technology and Evaluation	GCA_000284095.1	identical	ftp://ftp.ncbi.nlm.nih.gov/genomes/all/GCF/000/284/095/GCF_000284095.1_ASM28409v1
GCF_000284115.1	PRJNA224116	SAMD00061032		representative genome	1142394	547188	Phycisphaera mikurensis NBRC 102666	strain=NBRC 102666		latest	Complete Genome	Major	Full	2012-03-28	ASM28411v1	National Institute of Technology and Evaluation	GCA_000284115.1	identical	ftp://ftp.ncbi.nlm.nih.gov/genomes/all/GCF/000/284/115/GCF_000284115.1_ASM28411v1		assembly from type material
GCF_000284155.1	PRJNA224116	SAMN02603558		representative genome	1105110	787	Rickettsia australis str. Cutlack	strain=Cutlack		latest	Complete Genome	Major	Full	2012-03-01	ASM28415v1	Los Alamos National Laboratory	GCA_000284155.1	identical	ftp://ftp.ncbi.nlm.nih.gov/genomes/all/GCF/000/284/155/GCF_000284155.1_ASM28415v1
GCF_000284255.1	PRJNA224116	SAMD00061116		representative genome	983917	28068	Rubrivivax gelatinosus IL144	strain=IL144		latest	Complete Genome	Major	Full	2012-03-28	ASM28425v1	National Institute of Technology and Evaluation	GCA_000284255.1	identical	ftp://ftp.ncbi.nlm.nih.gov/genomes/all/GCF/000/284/255/GCF_000284255.1_ASM28425v1
GCF_000284295.1	PRJNA224116	SAMD00060941		representative genome	512565	1866	Actinoplanes missouriensis 431	strain=431		latest	Complete Genome	Major	Full	2012-03-28	ASM28429v1	National Institute of Technology and Evaluation	GCA_000284295.1	identical	ftp://ftp.ncbi.nlm.nih.gov/genomes/all/GCF/000/284/295/GCF_000284295.1_ASM28429v1		assembly from type material
GCF_000284315.1	PRJNA224116	SAMD00061058		representative genome	1162668	180	Leptospirillum ferrooxidans C2-3	strain=C2-3		latest	Complete Genome	Major	Full	2012-03-30	ASM28431v1	Ibaraki University, college of agriculture	GCA_000284315.1	identical	ftp://ftp.ncbi.nlm.nih.gov/genomes/all/GCF/000/284/315/GCF_000284315.1_ASM28431v1
GCF_000284335.1	PRJNA224116	SAMD00061110		representative genome	511051	693075	Caldisericum exile AZM16c01	strain=AZM16c01		latest	Complete Genome	Major	Full	2012-03-28	ASM28433v1	National Institute of Technology and Evaluation	GCA_000284335.1	identical	ftp://ftp.ncbi.nlm.nih.gov/genomes/all/GCF/000/284/335/GCF_000284335.1_ASM28433v1		assembly from type material
GCF_000284375.1	PRJNA224116	SAMD00060992		representative genome	1037409	375	Bradyrhizobium japonicum USDA 6	strain=USDA 6		latest	Complete Genome	Major	Full	2011-10-31	ASM28437v1	Kyoto Sangyo University	GCA_000284375.1	identical	ftp://ftp.ncbi.nlm.nih.gov/genomes/all/GCF/000/284/375/GCF_000284375.1_ASM28437v1		assembly from type material
GCF_000284415.1	PRJNA224116	SAMEA2272054		representative genome	1150469	1084	Pararhodospirillum photometricum DSM 122	strain=DSM 122		latest	Complete Genome	Major	Full	2012-02-23	ASM28441v2	CNRS	GCA_000284415.2	identical	ftp://ftp.ncbi.nlm.nih.gov/genomes/all/GCF/000/284/415/GCF_000284415.1_ASM28441v2		assembly from type material
GCF_000284515.1	PRJNA224116	SAMEA2272168		representative genome	866895	1570	Halobacillus halophilus DSM 2266	strain=type strain: DSM 2266		latest	Complete Genome	Major	Full	2012-04-11	ASM28451v1	Max-Planck-Institute of Biochemistry	GCA_000284515.1	identical	ftp://ftp.ncbi.nlm.nih.gov/genomes/all/GCF/000/284/515/GCF_000284515.1_ASM28451v1		assembly from type material
GCF_000284615.1	PRJNA224116	SAMEA2272383		representative genome	1163748	2743	Marinobacter hydrocarbonoclasticus ATCC 49840	strain=ATCC 49840		latest	Complete Genome	Major	Full	2012-03-27	ASM28461v1	Genoscope CEA	GCA_000284615.1	identical	ftp://ftp.ncbi.nlm.nih.gov/genomes/all/GCF/000/284/615/GCF_000284615.1_ASM28461v1		assembly from type material
GCF_000286435.2	PRJNA224116	SAMN02603113		representative genome	1124991	582	Morganella morganii subsp. morganii KT		KT	latest	Complete Genome	Major	Full	2013-02-28	ASM28643v2	Changhua Christian Hospital	GCA_000286435.2	identical	ftp://ftp.ncbi.nlm.nih.gov/genomes/all/GCF/000/286/435/GCF_000286435.2_ASM28643v2
GCF_000287335.1	PRJNA224116	SAMN02604351		representative genome	1199245	1199245	secondary endosymbiont of Ctenarytaina eucalypti			latest	Complete Genome	Major	Full	2012-08-13	ASM28733v1	Yale University	GCA_000287335.1	identical	ftp://ftp.ncbi.nlm.nih.gov/genomes/all/GCF/000/287/335/GCF_000287335.1_ASM28733v1
GCF_000287355.1	PRJNA224116	SAMN02604352		representative genome	134287	134287	secondary endosymbiont of Heteropsylla cubana			latest	Complete Genome	Major	Full	2012-08-13	ASM28735v1	Yale University	GCA_000287355.1	identical	ftp://ftp.ncbi.nlm.nih.gov/genomes/all/GCF/000/287/355/GCF_000287355.1_ASM28735v1
GCF_000294515.1	PRJNA224116	SAMN02603688		representative genome	1205910	53437	Nocardiopsis alba ATCC BAA-2165	strain=ATCC BAA-2165		latest	Complete Genome	Major	Full	2012-09-04	ASM29451v1	Ohio University	GCA_000294515.1	identical	ftp://ftp.ncbi.nlm.nih.gov/genomes/all/GCF/000/294/515/GCF_000294515.1_ASM29451v1
GCF_000294775.2	PRJNA224116	SAMN02470179		representative genome	1196031	665099	Bacillus oceanisediminis 2691	strain=2691		latest	Complete Genome	Major	Full	2016-05-09	ASM29477v2	KRIBB	GCA_000294775.2	identical	ftp://ftp.ncbi.nlm.nih.gov/genomes/all/GCF/000/294/775/GCF_000294775.2_ASM29477v2
GCF_000297055.2	PRJNA224116	SAMD00061061		representative genome	1163617	649841	Sulfuricella denitrificans skB26	strain=skB26		latest	Complete Genome	Major	Full	2013-09-09	ASM29705v2	Institute of Low Temperature Science	GCA_000297055.2	identical	ftp://ftp.ncbi.nlm.nih.gov/genomes/all/GCF/000/297/055/GCF_000297055.2_ASM29705v2		assembly from type material
GCF_000298115.2	PRJNA224116	SAMN02603054		representative genome	1071400	1581	Lactobacillus buchneri CD034	strain=CD034		latest	Complete Genome	Major	Full	2012-09-18	ASM29811v2	CeBiTec	GCA_000298115.2	identical	ftp://ftp.ncbi.nlm.nih.gov/genomes/all/GCF/000/298/115/GCF_000298115.2_ASM29811v2
GCF_000299235.1	PRJNA224116	SAMN02603870		representative genome	1048260	178606	Leptospirillum ferriphilum ML-04	strain=ML-04		latest	Complete Genome	Major	Full	2012-09-25	ASM29923v1	State Key Lab of Microbial Technology, Shandong University, Jinan, China	GCA_000299235.1	identical	ftp://ftp.ncbi.nlm.nih.gov/genomes/all/GCF/000/299/235/GCF_000299235.1_ASM29923v1
GCF_000299335.2	PRJNA224116	SAMN02471159		representative genome	391936	1306787	Alcanivorax pacificus W11-5	strain=W11-5		latest	Complete Genome	Major	Full	2015-01-09	ASM29933v2	The Third Institute of State Oceanic Administration (SOA), China.	GCA_000299335.2	identical	ftp://ftp.ncbi.nlm.nih.gov/genomes/all/GCF/000/299/335/GCF_000299335.2_ASM29933v2		assembly from type material
GCF_000299355.1	PRJNA224116	SAMN02603272		representative genome	1128398	1556	Gottschalkia acidurici 9a	strain=9a		latest	Complete Genome	Major	Full	2012-09-27	ASM29935v1	Georg-August-University Goettingen, Genomic and Applied Microbiology, Goettingen Genomics Laboratory	GCA_000299355.1	identical	ftp://ftp.ncbi.nlm.nih.gov/genomes/all/GCF/000/299/355/GCF_000299355.1_ASM29935v1		assembly from type material
GCF_000300005.1	PRJNA224116	SAMN02603961		representative genome	930169	285091	Alcanivorax dieselolei B5	strain=B5		latest	Complete Genome	Major	Full	2012-09-28	ASM30000v1	Third Institute of Oceanography, State Oceanic Administration	GCA_000300005.1	identical	ftp://ftp.ncbi.nlm.nih.gov/genomes/all/GCF/000/300/005/GCF_000300005.1_ASM30000v1		assembly from type material
GCF_000300135.1	PRJNA224116	SAMN02603179		representative genome	1229758	1252	Leuconostoc carnosum JB16	strain=JB16		latest	Complete Genome	Major	Full	2012-09-28	ASM30013v1	Department of Life Science, Chung-Ang University, Republic of Korea	GCA_000300135.1	identical	ftp://ftp.ncbi.nlm.nih.gov/genomes/all/GCF/000/300/135/GCF_000300135.1_ASM30013v1
GCF_000300235.2	PRJNA224116	SAMN02471162		representative genome	1123366	220697	Thalassospira xiamenensis M-5 = DSM 17429	strain=M-5		latest	Complete Genome	Major	Full	2015-01-09	ASM30023v2	The Third Institute of State Oceanic Administration (SOA)	GCA_000300235.2	identical	ftp://ftp.ncbi.nlm.nih.gov/genomes/all/GCF/000/300/235/GCF_000300235.2_ASM30023v2		assembly from type material
GCF_000300295.4	PRJNA224116	SAMN02469424		representative genome	1227812	1238	Piscirickettsia salmonis LF-89 = ATCC VR-1361	strain=ATCC VR-1361		latest	Complete Genome	Major	Full	2015-12-17	ASM30029v4	Macrogen	GCA_000300295.4	identical	ftp://ftp.ncbi.nlm.nih.gov/genomes/all/GCF/000/300/295/GCF_000300295.4_ASM30029v4		assembly from type material
GCF_000300455.3	PRJNA224116	SAMN02472168		representative genome	1235834	1158459	Kosakonia sacchari SP1	strain=SP1		latest	Complete Genome	Major	Full	2016-07-11	ASM30045v4	Zhejiang University	GCA_000300455.4	identical	ftp://ftp.ncbi.nlm.nih.gov/genomes/all/GCF/000/300/455/GCF_000300455.3_ASM30045v4		assembly from type material
GCF_000304215.1	PRJNA224116	SAMN02604114		representative genome	1147128	1684	Bifidobacterium asteroides PRL2011	strain=PRL2011		latest	Complete Genome	Major	Full	2012-10-09	ASM30421v1	University College Cork	GCA_000304215.1	identical	ftp://ftp.ncbi.nlm.nih.gov/genomes/all/GCF/000/304/215/GCF_000304215.1_ASM30421v1
GCF_000304735.1	PRJNA224116	SAMN02603021		representative genome	1239934	29518	Borreliella afzelii HLJ01	strain=HLJ01		latest	Complete Genome	Major	Full	2012-10-10	ASM30473v1	Beijing Institute of Microbiology and Epidemiology	GCA_000304735.1	identical	ftp://ftp.ncbi.nlm.nih.gov/genomes/all/GCF/000/304/735/GCF_000304735.1_ASM30473v1
GCF_000305785.2	PRJNA224116	SAMN02603035		representative genome	1117647	447471	Simiduia agarivorans SA1 = DSM 21679	strain=SA1 = DSM 21679		latest	Complete Genome	Major	Full	2013-05-31	ASM30578v2	Biodiversity Research Center, Academia Sinica,	GCA_000305785.2	identical	ftp://ftp.ncbi.nlm.nih.gov/genomes/all/GCF/000/305/785/GCF_000305785.2_ASM30578v2		assembly from type material
GCF_000305935.1	PRJNA224116	SAMN02603274		representative genome	1089553	85874	Thermacetogenium phaeum DSM 12270	strain=DSM 12270		latest	Complete Genome	Major	Full	2012-10-17	ASM30593v1	Georg-August-University Goettingen, Genomic and Applied Microbiology, Goettingen Genomics Laboratory	GCA_000305935.1	identical	ftp://ftp.ncbi.nlm.nih.gov/genomes/all/GCF/000/305/935/GCF_000305935.1_ASM30593v1		assembly from type material
GCF_000306725.1	PRJNA224116	SAMN00739943		representative genome	1094980	420950	Methanolobus psychrophilus R15	strain=R15		latest	Complete Genome	Major	Full	2012-10-18	ASM30672v1	Beijing Institute of Genomics	GCA_000306725.1	identical	ftp://ftp.ncbi.nlm.nih.gov/genomes/all/GCF/000/306/725/GCF_000306725.1_ASM30672v1		assembly from type material
GCF_000306765.2	PRJNA224116	SAMN02603397		representative genome	523841	2252	Haloferax mediterranei ATCC 33500	strain=CGMCC 1.2087		latest	Complete Genome	Major	Full	2014-05-27	ASM30676v2	Institute of Microbiology, Chinese Academy of Sciences	GCA_000306765.2	identical	ftp://ftp.ncbi.nlm.nih.gov/genomes/all/GCF/000/306/765/GCF_000306765.2_ASM30676v2		assembly from type material
GCF_000306785.1	PRJNA224116	SAMEA2272685		representative genome	477641	477641	Modestobacter marinus	strain=BC501		latest	Complete Genome	Major	Full	2012-05-24	ASM30678v1	CEA-IG Genoscope	GCA_000306785.1	identical	ftp://ftp.ncbi.nlm.nih.gov/genomes/all/GCF/000/306/785/GCF_000306785.1_ASM30678v1
GCF_000306885.1	PRJNA224116	SAMEA2272360		representative genome	100901	100901	Wolbachia endosymbiont of Onchocerca ochengi	strain=wOo		latest	Complete Genome	Major	Full	2012-07-30	ASM30688v1	University of Liverpool	GCA_000306885.1	identical	ftp://ftp.ncbi.nlm.nih.gov/genomes/all/GCF/000/306/885/GCF_000306885.1_ASM30688v1
GCF_000307105.1	PRJNA224116	SAMEA2272293		representative genome	651182	28223	Desulfobacula toluolica Tol2	strain=Tol2		latest	Complete Genome	Major	Full	2012-09-17	ASM30710v1	Max Planck Society	GCA_000307105.1	identical	ftp://ftp.ncbi.nlm.nih.gov/genomes/all/GCF/000/307/105/GCF_000307105.1_ASM30710v1		assembly from type material
GCF_000307165.1	PRJNA224116	SAMD00061112		representative genome	698758	1449	Amphibacillus xylanus NBRC 15112	strain=NBRC 15112		latest	Complete Genome	Major	Full	2012-10-01	ASM30716v1	National Institute of Technology and Evaluation	GCA_000307165.1	identical	ftp://ftp.ncbi.nlm.nih.gov/genomes/all/GCF/000/307/165/GCF_000307165.1_ASM30716v1		assembly from type material
GCF_000309885.1	PRJNA224116	SAMN02261408		representative genome	751945	56957	Thermus oshimai JL-2	strain=JL-2		latest	Complete Genome	Major	Full	2012-11-05	ASM30988v1	JGI	GCA_000309885.1	identical	ftp://ftp.ncbi.nlm.nih.gov/genomes/all/GCF/000/309/885/GCF_000309885.1_ASM30988v1
GCF_000311765.1	PRJNA224116	SAMN02603014		representative genome	1224746	442	Gluconobacter oxydans H24	strain=H24		latest	Complete Genome	Major	Full	2012-11-08	ASM31176v1	Beijing institute of biotechnology	GCA_000311765.1	identical	ftp://ftp.ncbi.nlm.nih.gov/genomes/all/GCF/000/311/765/GCF_000311765.1_ASM31176v1
GCF_000313175.2	PRJNA224116	SAMN02470123		representative genome	758847	28183	Leptospira santarosai serovar Shermani str. LT 821			latest	Complete Genome	Major	Full	2014-10-08	ASM31317v2	Kidney research center, Chang Gung Memorial Hospital	GCA_000313175.2	identical	ftp://ftp.ncbi.nlm.nih.gov/genomes/all/GCF/000/313/175/GCF_000313175.2_ASM31317v2		assembly from type material
GCF_000313635.1	PRJNA224116	SAMN02603597		representative genome	1118964	2100	Mycoplasma hyorhinis SK76	strain=SK76		latest	Complete Genome	Major	Full	2012-11-20	ASM31363v1	MD Anderson Cancer Center	GCA_000313635.1	identical	ftp://ftp.ncbi.nlm.nih.gov/genomes/all/GCF/000/313/635/GCF_000313635.1_ASM31363v1
GCF_000316515.1	PRJNA224116	SAMN02261330		representative genome	292564	59930	Cyanobium gracile PCC 6307	strain=PCC 6307		latest	Complete Genome	Major	Full	2012-12-04	ASM31651v1	JGI	GCA_000316515.1	identical	ftp://ftp.ncbi.nlm.nih.gov/genomes/all/GCF/000/316/515/GCF_000316515.1_ASM31651v1		assembly from type material
GCF_000317025.1	PRJNA224116	SAMN02261346		representative genome	118163	54308	Pleurocapsa sp. PCC 7327	strain=PCC 7327		latest	Complete Genome	Major	Full	2012-12-05	ASM31702v1	JGI	GCA_000317025.1	identical	ftp://ftp.ncbi.nlm.nih.gov/genomes/all/GCF/000/317/025/GCF_000317025.1_ASM31702v1
GCF_000317105.1	PRJNA224116	SAMN02261334		representative genome	56110	118323	Oscillatoria acuminata PCC 6304	strain=PCC 6304		latest	Complete Genome	Major	Full	2012-12-05	ASM31710v1	JGI	GCA_000317105.1	identical	ftp://ftp.ncbi.nlm.nih.gov/genomes/all/GCF/000/317/105/GCF_000317105.1_ASM31710v1		assembly from type material
GCF_000317125.1	PRJNA224116	SAMN02261359		representative genome	251229	54299	Chroococcidiopsis thermalis PCC 7203	strain=PCC 7203		latest	Complete Genome	Major	Full	2012-12-05	ASM31712v1	JGI	GCA_000317125.1	identical	ftp://ftp.ncbi.nlm.nih.gov/genomes/all/GCF/000/317/125/GCF_000317125.1_ASM31712v1		assembly from type material
GCF_000317305.3	PRJNA224116	SAMN02641502		representative genome	700508	1795	Mycolicibacterium neoaurum VKM Ac-1815D	strain=VKM Ac-1815D		latest	Complete Genome	Major	Full	2014-08-26	ASM31730v3	Laboratory of microbiological transformation of organic compounds, G.K.Skryabin Institute of Biochemistry and Physiology of Microorganisms, Russian Academy of Sciences	GCA_000317305.3	identical	ftp://ftp.ncbi.nlm.nih.gov/genomes/all/GCF/000/317/305/GCF_000317305.3_ASM31730v3
GCF_000317435.1	PRJNA224116	SAMN02261327		representative genome	1170562	32054	Calothrix sp. PCC 6303	strain=PCC 6303		latest	Complete Genome	Major	Full	2012-12-06	ASM31743v1	JGI	GCA_000317435.1	identical	ftp://ftp.ncbi.nlm.nih.gov/genomes/all/GCF/000/317/435/GCF_000317435.1_ASM31743v1
GCF_000317475.1	PRJNA224116	SAMN02261335		representative genome	179408	482564	Oscillatoria nigro-viridis PCC 7112	strain=PCC 7112		latest	Complete Genome	Major	Full	2012-12-06	ASM31747v1	JGI	GCA_000317475.1	identical	ftp://ftp.ncbi.nlm.nih.gov/genomes/all/GCF/000/317/475/GCF_000317475.1_ASM31747v1		assembly from type material
GCF_000317495.1	PRJNA224116	SAMN02261349		representative genome	1173022	241425	Crinalium epipsammum PCC 9333	strain=PCC 9333		latest	Complete Genome	Major	Full	2012-12-06	ASM31749v1	JGI	GCA_000317495.1	identical	ftp://ftp.ncbi.nlm.nih.gov/genomes/all/GCF/000/317/495/GCF_000317495.1_ASM31749v1
GCF_000317575.1	PRJNA224116	SAMN02261352		representative genome	111780	102116	Stanieria cyanosphaera PCC 7437	strain=PCC 7437		latest	Complete Genome	Major	Full	2012-12-06	ASM31757v1	JGI	GCA_000317575.1	identical	ftp://ftp.ncbi.nlm.nih.gov/genomes/all/GCF/000/317/575/GCF_000317575.1_ASM31757v1		assembly from type material
GCF_000317615.1	PRJNA224116	SAMN02261331		representative genome	13035	292566	Dactylococcopsis salina PCC 8305	strain=PCC 8305		latest	Complete Genome	Major	Full	2012-12-07	ASM31761v1	JGI	GCA_000317615.1	identical	ftp://ftp.ncbi.nlm.nih.gov/genomes/all/GCF/000/317/615/GCF_000317615.1_ASM31761v1		assembly from type material
GCF_000317675.1	PRJNA224116	SAMN02261329		representative genome	755178	379064	Cyanobacterium aponinum PCC 10605	strain=PCC 10605		latest	Complete Genome	Major	Full	2012-12-07	ASM31767v1	JGI	GCA_000317675.1	identical	ftp://ftp.ncbi.nlm.nih.gov/genomes/all/GCF/000/317/675/GCF_000317675.1_ASM31767v1		assembly from type material
GCF_000317695.1	PRJNA224116	SAMN02232008		representative genome	272123	1165	Anabaena cylindrica PCC 7122	strain=PCC 7122		latest	Complete Genome	Major	Full	2012-12-07	ASM31769v1	DOE Joint Genome Institute	GCA_000317695.1	identical	ftp://ftp.ncbi.nlm.nih.gov/genomes/all/GCF/000/317/695/GCF_000317695.1_ASM31769v1		assembly from type material
GCF_000317795.1	PRJNA224116	SAMN02261426		representative genome	1056495	200415	Caldisphaera lagunensis DSM 15908	strain=DSM 15908		latest	Complete Genome	Major	Full	2012-12-10	ASM31779v1	JGI	GCA_000317795.1	identical	ftp://ftp.ncbi.nlm.nih.gov/genomes/all/GCF/000/317/795/GCF_000317795.1_ASM31779v1		assembly from type material
GCF_000317835.1	PRJNA224116	SAMN02261392		representative genome	937777	432329	Deinococcus peraridilitoris DSM 19664	strain=DSM 19664		latest	Complete Genome	Major	Full	2012-12-10	ASM31783v1	JGI	GCA_000317835.1	identical	ftp://ftp.ncbi.nlm.nih.gov/genomes/all/GCF/000/317/835/GCF_000317835.1_ASM31783v1		assembly from type material
GCF_000317855.1	PRJNA224116	SAMEA3138428		representative genome	759913	1334	Streptococcus dysgalactiae subsp. equisimilis AC-2713	strain=AC-2713		latest	Complete Genome	Major	Full	2012-10-31	ASM31785v1	DWI an der RWTH Aachen e. V.	GCA_000317855.1	identical	ftp://ftp.ncbi.nlm.nih.gov/genomes/all/GCF/000/317/855/GCF_000317855.1_ASM31785v1
GCF_000317975.2	PRJNA224116	SAMEA2272423		representative genome	1234679	2751	Carnobacterium maltaromaticum LMA28	strain=LMA28		latest	Complete Genome	Major	Full	2013-05-30	ASM31797v2	LIBio	GCA_000317975.2	identical	ftp://ftp.ncbi.nlm.nih.gov/genomes/all/GCF/000/317/975/GCF_000317975.2_ASM31797v2
GCF_000319245.1	PRJNA224116	SAMN02641518		representative genome	1208923	233181	Candidatus Kinetoplastibacterium blastocrithidii (ex Strigomonas culicis)			latest	Complete Genome	Major	Full	2012-12-11	ASM31924v1	LNCC	GCA_000319245.1	identical	ftp://ftp.ncbi.nlm.nih.gov/genomes/all/GCF/000/319/245/GCF_000319245.1_ASM31924v1
GCF_000319575.2	PRJNA224116	SAMN02603230		representative genome	1260251	1335746	Spiribacter salinus M19-40	strain=M19-40		latest	Complete Genome	Major	Full	2013-05-24	ASM31957v2	Evolutionary Genomics Group, Universidad Miguel Hernandez, San Juan de Alicante, Spain	GCA_000319575.2	identical	ftp://ftp.ncbi.nlm.nih.gov/genomes/all/GCF/000/319/575/GCF_000319575.2_ASM31957v2		assembly from type material
GCF_000321415.2	PRJNA224116	SAMN02602962		representative genome	1255043	186931	Thioalkalivibrio nitratireducens DSM 14787	strain=DSM 14787		latest	Complete Genome	Major	Full	2015-12-23	ASM32141v2	A.N. Bach Institute of Biochemistry	GCA_000321415.2	identical	ftp://ftp.ncbi.nlm.nih.gov/genomes/all/GCF/000/321/415/GCF_000321415.2_ASM32141v2		assembly from type material
GCF_000325665.1	PRJNA224116	SAMN02603038		representative genome	1042417	52584	Brachyspira pilosicoli P43/6/78	strain=P43/6/78		latest	Complete Genome	Major	Full	2012-12-19	ASM32566v1	Biomedical Science, Cornell University	GCA_000325665.1	identical	ftp://ftp.ncbi.nlm.nih.gov/genomes/all/GCF/000/325/665/GCF_000325665.1_ASM32566v1		assembly from type material
GCF_000325705.1	PRJNA224116	SAMN02232018		representative genome	926556	390884	Echinicola vietnamensis DSM 17526	strain=DSM 17526		latest	Complete Genome	Major	Full	2012-12-19	ASM32570v1	DOE Joint Genome Institute	GCA_000325705.1	identical	ftp://ftp.ncbi.nlm.nih.gov/genomes/all/GCF/000/325/705/GCF_000325705.1_ASM32570v1		assembly from type material
GCF_000325745.1	PRJNA224116	SAMN02604174		representative genome	1215343	1273132	Liberibacter crescens BT-1	strain=BT-1		latest	Complete Genome	Major	Full	2012-12-19	ASM32574v1	University of Florida	GCA_000325745.1	identical	ftp://ftp.ncbi.nlm.nih.gov/genomes/all/GCF/000/325/745/GCF_000325745.1_ASM32574v1		assembly from type material
GCF_000327045.1	PRJNA224116	SAMN02232063		representative genome	765912	80679	Thioflavicoccus mobilis 8321	strain=8321		latest	Complete Genome	Major	Full	2012-12-20	ASM32704v1	DOE Joint Genome Institute	GCA_000327045.1	identical	ftp://ftp.ncbi.nlm.nih.gov/genomes/all/GCF/000/327/045/GCF_000327045.1_ASM32704v1		assembly from type material
GCF_000327485.1	PRJNA224116	SAMN02232038		representative genome	593750	882104	Methanoregula formicica SMSP	strain=SMSP		latest	Complete Genome	Major	Full	2012-12-21	ASM32748v1	DOE Joint Genome Institute	GCA_000327485.1	identical	ftp://ftp.ncbi.nlm.nih.gov/genomes/all/GCF/000/327/485/GCF_000327485.1_ASM32748v1		assembly from type material
GCF_000328625.1	PRJNA224116	SAMN02261360		representative genome	748449	42422	Halobacteroides halobius DSM 5150	strain=DSM 5150		latest	Complete Genome	Major	Full	2012-12-28	ASM32862v1	JGI	GCA_000328625.1	identical	ftp://ftp.ncbi.nlm.nih.gov/genomes/all/GCF/000/328/625/GCF_000328625.1_ASM32862v1		assembly from type material
GCF_000328665.1	PRJNA224116	SAMN02261367		representative genome	867904	101192	Methanomethylovorans hollandica DSM 15978	strain=DSM 15978		latest	Complete Genome	Major	Full	2012-12-28	ASM32866v1	JGI	GCA_000328665.1	identical	ftp://ftp.ncbi.nlm.nih.gov/genomes/all/GCF/000/328/665/GCF_000328665.1_ASM32866v1		assembly from type material
GCF_000328685.1	PRJNA224116	SAMN02261263		representative genome	694430	29288	Natronococcus occultus SP4	strain=SP4		latest	Complete Genome	Major	Full	2012-12-28	ASM32868v1	JGI	GCA_000328685.1	identical	ftp://ftp.ncbi.nlm.nih.gov/genomes/all/GCF/000/328/685/GCF_000328685.1_ASM32868v1		assembly from type material
GCF_000328705.1	PRJNA224116	SAMEA2272236		representative genome	1179773	103731	Saccharothrix espanaensis DSM 44229	strain=type strain: DSM 44229		latest	Complete Genome	Major	Full	2012-10-02	ASM32870v1	CeBiTec, Technology Platform Genomics	GCA_000328705.1	identical	ftp://ftp.ncbi.nlm.nih.gov/genomes/all/GCF/000/328/705/GCF_000328705.1_ASM32870v1		assembly from type material
GCF_000328725.1	PRJNA224116	SAMEA2272626		representative genome	1246955	171284	Mycoplasma cynos C142	strain=C142		latest	Complete Genome	Major	Full	2012-12-12	ASM32872v1	RVC	GCA_000328725.1	identical	ftp://ftp.ncbi.nlm.nih.gov/genomes/all/GCF/000/328/725/GCF_000328725.1_ASM32872v1
GCF_000328765.2	PRJNA224116	SAMEA2272437		representative genome	1209989	499229	Tepidanaerobacter acetatoxydans Re1	strain=Re1		latest	Complete Genome	Major	Full	2013-10-16	ASM32876v2	HGEN	GCA_000328765.2	identical	ftp://ftp.ncbi.nlm.nih.gov/genomes/all/GCF/000/328/765/GCF_000328765.2_ASM32876v2		assembly from type material
GCF_000330885.1	PRJNA224116	SAMN02604105		representative genome	698761	398	Rhizobium tropici CIAT 899	strain=CIAT 899		latest	Complete Genome	Major	Full	2013-01-03	ASM33088v1	Universidad Nacional Autonoma de Mexico	GCA_000330885.1	identical	ftp://ftp.ncbi.nlm.nih.gov/genomes/all/GCF/000/330/885/GCF_000330885.1_ASM33088v1		assembly from type material
GCF_000331735.1	PRJNA224116	SAMN02603594		representative genome	1278073	83455	Myxococcus stipitatus DSM 14675	strain=DSM 14675		latest	Complete Genome	Major	Full	2013-01-14	ASM33173v1	Max Planck Institute for Terrrestrial Microbiology	GCA_000331735.1	identical	ftp://ftp.ncbi.nlm.nih.gov/genomes/all/GCF/000/331/735/GCF_000331735.1_ASM33173v1		assembly from type material
GCF_000331995.1	PRJNA224116	SAMN02603280		representative genome	1121335	1510	Thermoclostridium stercorarium subsp. stercorarium DSM 8532	strain=DSM 8532		latest	Complete Genome	Major	Full	2013-01-17	ASM33199v1	Georg-August-University-Goettingen, Genomic and Applied Microbiology, Goettingen Genomics Laboratory	GCA_000331995.1	identical	ftp://ftp.ncbi.nlm.nih.gov/genomes/all/GCF/000/331/995/GCF_000331995.1_ASM33199v1		assembly from type material
GCF_000332115.1	PRJNA224116	SAMN02603479		representative genome	592029	328515	Nonlabens dokdonensis DSW-6	strain=DSW-6		latest	Complete Genome	Major	Full	2013-01-18	ASM33211v1	Korea Research Institute of Bioscience and Biotechnology	GCA_000332115.1	identical	ftp://ftp.ncbi.nlm.nih.gov/genomes/all/GCF/000/332/115/GCF_000332115.1_ASM33211v1		assembly from type material
GCF_000332735.1	PRJNA224116	SAMN02604131		representative genome	1194526	1292	Staphylococcus warneri SG1	strain=SG1		latest	Complete Genome	Major	Full	2013-01-23	ASM33273v1	University of Alberta	GCA_000332735.1	identical	ftp://ftp.ncbi.nlm.nih.gov/genomes/all/GCF/000/332/735/GCF_000332735.1_ASM33273v1
GCF_000340435.2	PRJNA224116	SAMN01918491		representative genome	1202450	29311	Mycobacterium haemophilum DSM 44634	strain=ATCC 29548		latest	Complete Genome	Major	Full	2015-10-30	ASM34043v3	Albert Einstein College of Medicine	GCA_000340435.3	identical	ftp://ftp.ncbi.nlm.nih.gov/genomes/all/GCF/000/340/435/GCF_000340435.2_ASM34043v3		assembly from type material
GCF_000340885.1	PRJNA224116	SAMN02603265		representative genome	931276	36745	Clostridium saccharoperbutylacetonicum N1-4(HMT)	strain=N1-4(HMT)		latest	Complete Genome	Major	Full	2013-02-19	ASM34088v1	Georg-August-University Goettingen	GCA_000340885.1	identical	ftp://ftp.ncbi.nlm.nih.gov/genomes/all/GCF/000/340/885/GCF_000340885.1_ASM34088v1		assembly from type material
GCF_000341345.1	PRJNA224116	SAMN02603027		representative genome	1121362	225326	Corynebacterium halotolerans YIM 70093 = DSM 44683			latest	Complete Genome	Major	Full	2013-02-20	ASM34134v1	Bielefeld University	GCA_000341345.1	identical	ftp://ftp.ncbi.nlm.nih.gov/genomes/all/GCF/000/341/345/GCF_000341345.1_ASM34134v1		assembly from type material
GCF_000341355.1	PRJNA224116	SAMN02604270		representative genome	1094489	388640	Bartonella australis Aust/NH1	strain=Aust/NH1		latest	Complete Genome	Major	Full	2013-02-20	ASM34135v1	Uppsala University	GCA_000341355.1	identical	ftp://ftp.ncbi.nlm.nih.gov/genomes/all/GCF/000/341/355/GCF_000341355.1_ASM34135v1		assembly from type material
GCF_000341385.1	PRJNA224116	SAMN02604271		representative genome	1094497	33047	Bartonella vinsonii subsp. berkhoffii str. Winnie	strain=Winnie		latest	Complete Genome	Major	Full	2013-02-20	ASM34138v1	Uppsala University	GCA_000341385.1	identical	ftp://ftp.ncbi.nlm.nih.gov/genomes/all/GCF/000/341/385/GCF_000341385.1_ASM34138v1
GCF_000341395.1	PRJNA224116	SAMN02602964		representative genome	1167006	65555	Desulfocapsa sulfexigens DSM 10523	strain=DSM 10523		latest	Complete Genome	Major	Full	2013-02-20	ASM34139v1	Aarhus University, Aarhus, Denmark	GCA_000341395.1	identical	ftp://ftp.ncbi.nlm.nih.gov/genomes/all/GCF/000/341/395/GCF_000341395.1_ASM34139v1		assembly from type material
GCF_000344785.1	PRJNA224116	SAMN02603058		representative genome	1121353	1721	Corynebacterium callunae DSM 20147	strain=DSM 20147		latest	Complete Genome	Major	Full	2013-03-06	ASM34478v1	CeBiTec, Bielefeld University	GCA_000344785.1	identical	ftp://ftp.ncbi.nlm.nih.gov/genomes/all/GCF/000/344/785/GCF_000344785.1_ASM34478v1		assembly from type material
GCF_000344805.1	PRJNA224116	SAMD00061052		representative genome	1245469	44255	Bradyrhizobium oligotrophicum S58	strain=S58		latest	Complete Genome	Major	Full	2013-02-28	ASM34480v1	Tohoku University	GCA_000344805.1	identical	ftp://ftp.ncbi.nlm.nih.gov/genomes/all/GCF/000/344/805/GCF_000344805.1_ASM34480v1		assembly from type material
GCF_000347595.1	PRJNA224116	SAMN02048828		representative genome	1171377	47735	Bibersteinia trehalosi USDA-ARS-USMARC-192	strain=USDA-ARS-USMARC-192		latest	Complete Genome	Major	Full	2013-03-20	ASM34759v1	USDA-ARS-USMARC	GCA_000347595.1	identical	ftp://ftp.ncbi.nlm.nih.gov/genomes/all/GCF/000/347/595/GCF_000347595.1_ASM34759v1
GCF_000347635.1	PRJNA224116	SAMN02603050		representative genome	1129794	326544	Paraglaciecola psychrophila 170	strain=170		latest	Complete Genome	Major	Full	2013-03-20	ASM34763v1	CAS Key Laboratory of Genome Sciences and Information, Beijing Institute of Genomics, Chinese Academy of Sciences	GCA_000347635.1	identical	ftp://ftp.ncbi.nlm.nih.gov/genomes/all/GCF/000/347/635/GCF_000347635.1_ASM34763v1		assembly from type material
GCF_000347695.1	PRJNA224116	SAMN02603226		representative genome	1254439	33905	Bifidobacterium thermophilum RBL67	strain=RBL67		latest	Complete Genome	Major	Full	2013-03-20	ASM34769v1	ETH Zurich	GCA_000347695.1	identical	ftp://ftp.ncbi.nlm.nih.gov/genomes/all/GCF/000/347/695/GCF_000347695.1_ASM34769v1
GCF_000348725.1	PRJNA224116	SAMN02604325		representative genome	1184267	453816	Bdellovibrio exovorus JSS	strain=JSS		latest	Complete Genome	Major	Full	2013-03-25	ASM34872v1	Weizmann Institute of Science	GCA_000348725.1	identical	ftp://ftp.ncbi.nlm.nih.gov/genomes/all/GCF/000/348/725/GCF_000348725.1_ASM34872v1		assembly from type material
GCF_000348805.1	PRJNA224116	SAMD00061034		representative genome	1229512	1653831	Blattabacterium cuenoti BPAA	strain=BPAA		latest	Complete Genome	Major	Full	2013-03-13	ASM34880v1	University of the Ryukyus	GCA_000348805.1	identical	ftp://ftp.ncbi.nlm.nih.gov/genomes/all/GCF/000/348/805/GCF_000348805.1_ASM34880v1
GCF_000349975.1	PRJNA224116	SAMD00061010		representative genome	537971	213	Helicobacter cinaedi CCUG 18818 = ATCC BAA-847	strain=ATCC BAA-847		latest	Complete Genome	Major	Full	2012-07-18	ASM34997v1	National Center for Global Health and Medicine	GCA_000349975.1	identical	ftp://ftp.ncbi.nlm.nih.gov/genomes/all/GCF/000/349/975/GCF_000349975.1_ASM34997v1
GCF_000350305.1	PRJNA224116	SAMN02603168		representative genome	1054217	1054217	Thermoplasmatales archaeon BRNA1	strain=BRNA1		latest	Complete Genome	Major	Full	2013-04-02	ASM35030v1	CSIRO Livestock Industries	GCA_000350305.1	identical	ftp://ftp.ncbi.nlm.nih.gov/genomes/all/GCF/000/350/305/GCF_000350305.1_ASM35030v1
GCF_000354175.2	PRJNA224116	SAMN02603463		representative genome	1219076	663	Vibrio alginolyticus NBRC 15630 = ATCC 17749	strain=ATCC 17749		latest	Complete Genome	Major	Full	2013-09-10	ASM35417v2	Jinan Military General Hospital	GCA_000354175.2	identical	ftp://ftp.ncbi.nlm.nih.gov/genomes/all/GCF/000/354/175/GCF_000354175.2_ASM35417v2		assembly from type material
GCF_000355675.1	PRJNA224116	SAMEA2272589		representative genome	1298593	187493	Thalassolituus oleivorans MIL-1	strain=MIL-1		latest	Complete Genome	Major	Full	2013-03-14	ASM35567v1	MPI BREMEN	GCA_000355675.1	identical	ftp://ftp.ncbi.nlm.nih.gov/genomes/all/GCF/000/355/675/GCF_000355675.1_ASM35567v1		assembly from type material
GCF_000355765.4	PRJNA224116	SAMEA2272307		representative genome	1288494	1288494	Nitrosospira lacus	strain=APG3		latest	Complete Genome	Major	Full	2017-07-17	ASM35576v4	MDA	GCA_000355765.4	identical	ftp://ftp.ncbi.nlm.nih.gov/genomes/all/GCF/000/355/765/GCF_000355765.4_ASM35576v4		assembly from type material
GCF_000367205.1	PRJNA224116	SAMN02603001		representative genome	1170318	33010	Cutibacterium avidum 44067	strain=44067		latest	Complete Genome	Major	Full	2013-04-17	ASM36720v1	BAYGEN	GCA_000367205.1	identical	ftp://ftp.ncbi.nlm.nih.gov/genomes/all/GCF/000/367/205/GCF_000367205.1_ASM36720v1
GCF_000376545.2	PRJNA224116	SAMN02471033		representative genome	1265309	379347	Epibacterium mobile F1926	strain=F1926		latest	Complete Genome	Major	Full	2016-07-07	ASM37654v2	Technical University of Denmark, Department of Systems Biology	GCA_000376545.2	identical	ftp://ftp.ncbi.nlm.nih.gov/genomes/all/GCF/000/376/545/GCF_000376545.2_ASM37654v2
GCF_000376585.1	PRJNA224116	SAMN02604272		representative genome	1236908	77038	Wolbachia endosymbiont of Drosophila simulans wNo	strain=wNo		latest	Complete Genome	Major	Full	2013-04-22	ASM37658v1	Uppsala University	GCA_000376585.1	identical	ftp://ftp.ncbi.nlm.nih.gov/genomes/all/GCF/000/376/585/GCF_000376585.1_ASM37658v1
GCF_000376645.1	PRJNA224116	SAMN02603277		representative genome	1316932	75985	Mannheimia haemolytica M42548	strain=M42548		latest	Complete Genome	Major	Full	2013-04-22	ASM37664v1	Georg-August-University Goettingen, Genomic and Applied Microbiology, Goettingen Genomics Laboratory	GCA_000376645.1	identical	ftp://ftp.ncbi.nlm.nih.gov/genomes/all/GCF/000/376/645/GCF_000376645.1_ASM37664v1
GCF_000380335.1	PRJNA224116	SAMN01889086		representative genome	1283330	354	Azotobacter vinelandii CA	strain=CA		latest	Complete Genome	Major	Full	2013-04-23	ASM38033v1	North Carolina State University	GCA_000380335.1	identical	ftp://ftp.ncbi.nlm.nih.gov/genomes/all/GCF/000/380/335/GCF_000380335.1_ASM38033v1
GCF_000385565.1	PRJNA224116	SAMN02028569		representative genome	387631	1316941	Archaeoglobus sulfaticallidus PM70-1	strain=PM70-1		latest	Complete Genome	Major	Full	2013-04-30	ASM38556v1	University of Bergen, Centre for Geobiology, Department of Biology	GCA_000385565.1	identical	ftp://ftp.ncbi.nlm.nih.gov/genomes/all/GCF/000/385/565/GCF_000385565.1_ASM38556v1		assembly from type material
GCF_000385925.1	PRJNA224116	SAMN02603400		representative genome	1302863	45634	Streptococcus cristatus AS 1.3089	strain=AS 1.3089		latest	Complete Genome	Major	Full	2013-05-01	ASM38592v1	Institute of Microbiology, Chinese Academy of Sciences	GCA_000385925.1	identical	ftp://ftp.ncbi.nlm.nih.gov/genomes/all/GCF/000/385/925/GCF_000385925.1_ASM38592v1		assembly from synonym type material
GCF_000389635.1	PRJNA224116	SAMN02602952		representative genome	86416	1501	Clostridium pasteurianum BC1	strain=BC1		latest	Complete Genome	Major	Full	2013-05-06	ASM38963v1	Brookhaven National Laboratory	GCA_000389635.1	identical	ftp://ftp.ncbi.nlm.nih.gov/genomes/all/GCF/000/389/635/GCF_000389635.1_ASM38963v1
GCF_000397205.1	PRJNA224116	SAMN02603271		representative genome	1124983	380021	Pseudomonas protegens CHA0	strain=CHA0		latest	Complete Genome	Major	Full	2013-05-16	ASM39720v1	Georg-August-University Goettingen, Genomic and Applied Microbiology, Goettingen Genomics Laboratory	GCA_000397205.1	identical	ftp://ftp.ncbi.nlm.nih.gov/genomes/all/GCF/000/397/205/GCF_000397205.1_ASM39720v1		assembly from type material
GCF_000400935.1	PRJNA224116	SAMN02602968		representative genome	1276227	216933	Spiroplasma chrysopicola DF-1	strain=DF-1		latest	Complete Genome	Major	Full	2013-05-22	ASM40093v1	Academia Sinica	GCA_000400935.1	identical	ftp://ftp.ncbi.nlm.nih.gov/genomes/all/GCF/000/400/935/GCF_000400935.1_ASM40093v1		assembly from type material
GCF_000400955.1	PRJNA224116	SAMN02602969		representative genome	1276229	216945	Spiroplasma syrphidicola EA-1	strain=EA-1		latest	Complete Genome	Major	Full	2013-05-22	ASM40095v1	Academia Sinica	GCA_000400955.1	identical	ftp://ftp.ncbi.nlm.nih.gov/genomes/all/GCF/000/400/955/GCF_000400955.1_ASM40095v1		assembly from type material
GCF_000412695.1	PRJNA224116	SAMD00061053		representative genome	1245471	53412	Pseudomonas resinovorans NBRC 106553	strain=NBRC 106553		latest	Complete Genome	Major	Full	2013-06-14	ASM41269v1	National Institute of Technology and Evaluation	GCA_000412695.1	identical	ftp://ftp.ncbi.nlm.nih.gov/genomes/all/GCF/000/412/695/GCF_000412695.1_ASM41269v1
GCF_000418365.1	PRJNA224116	SAMN02603028		representative genome	1200352	89154	Corynebacterium terpenotabidum Y-11	strain=Y-11		latest	Complete Genome	Major	Full	2013-07-05	ASM41836v1	Bielefeld University	GCA_000418365.1	identical	ftp://ftp.ncbi.nlm.nih.gov/genomes/all/GCF/000/418/365/GCF_000418365.1_ASM41836v1		assembly from type material
GCF_000422085.1	PRJNA224116	SAMN02604177		representative genome	1346614	614	Serratia liquefaciens ATCC 27592	strain=ATCC 27592		latest	Complete Genome	Major	Full	2013-07-11	ASM42208v1	University of Florida	GCA_000422085.1	identical	ftp://ftp.ncbi.nlm.nih.gov/genomes/all/GCF/000/422/085/GCF_000422085.1_ASM42208v1		assembly from type material
GCF_000439435.1	PRJNA224116	SAMN02602966		representative genome	1276220	2145	Spiroplasma taiwanense CT-1	strain=CT-1		latest	Complete Genome	Major	Full	2013-07-17	ASM43943v1	Academia Sinica	GCA_000439435.1	identical	ftp://ftp.ncbi.nlm.nih.gov/genomes/all/GCF/000/439/435/GCF_000439435.1_ASM43943v1		assembly from type material
GCF_000439455.1	PRJNA224116	SAMN02602967		representative genome	1276221	216936	Spiroplasma diminutum CUAS-1	strain=CUAS-1		latest	Complete Genome	Major	Full	2013-07-17	ASM43945v1	Academia Sinica	GCA_000439455.1	identical	ftp://ftp.ncbi.nlm.nih.gov/genomes/all/GCF/000/439/455/GCF_000439455.1_ASM43945v1		assembly from type material
GCF_000442645.1	PRJNA224116	SAMN02603057		representative genome	1224163	575200	Corynebacterium maris DSM 45190	strain=DSM 45190		latest	Complete Genome	Major	Full	2013-08-01	ASM44264v1	CeBiTec, Bielefeld University	GCA_000442645.1	identical	ftp://ftp.ncbi.nlm.nih.gov/genomes/all/GCF/000/442/645/GCF_000442645.1_ASM44264v1		assembly from type material
GCF_000444875.1	PRJNA224116	SAMN02603029		representative genome	1214242	42684	Streptomyces collinus Tu 365	strain=Tu 365		latest	Complete Genome	Major	Full	2013-08-06	ASM44487v1	Bielefeld University	GCA_000444875.1	identical	ftp://ftp.ncbi.nlm.nih.gov/genomes/all/GCF/000/444/875/GCF_000444875.1_ASM44487v1
GCF_000444995.1	PRJNA224116	SAMN02604253		representative genome	1367847	34003	Paracoccus aminophilus JCM 7686	strain=JCM 7686		latest	Complete Genome	Major	Full	2013-08-08	ASM44499v1	University of Warsaw, Faculty of Biology, Institute of Microbiology, Department of Bacterial Genetics	GCA_000444995.1	identical	ftp://ftp.ncbi.nlm.nih.gov/genomes/all/GCF/000/444/995/GCF_000444995.1_ASM44499v1		assembly from type material
GCF_000445425.4	PRJNA224116	SAMN02604147		representative genome	1302858	47466	Borrelia miyamotoi LB-2001	strain=LB-2001		latest	Complete Genome	Major	Full	2015-11-04	ASM44542v4	University of California Irvine	GCA_000445425.4	identical	ftp://ftp.ncbi.nlm.nih.gov/genomes/all/GCF/000/445/425/GCF_000445425.4_ASM44542v4
GCF_000447675.1	PRJNA224116	SAMN02603890		representative genome	1291379	409322	Treponema pedis str. T A4	strain=T A4		latest	Complete Genome	Major	Full	2013-08-16	ASM44767v1	Swedish University of Agricultural Sciences	GCA_000447675.1	identical	ftp://ftp.ncbi.nlm.nih.gov/genomes/all/GCF/000/447/675/GCF_000447675.1_ASM44767v1
GCF_000454045.1	PRJNA224116	SAMN02603403		representative genome	1136179	1833	Rhodococcus erythropolis CCM2595	strain=CCM2595		latest	Complete Genome	Major	Full	2013-08-22	ASM45404v1	Institute of Molecular Genetics of the ASCR	GCA_000454045.1	identical	ftp://ftp.ncbi.nlm.nih.gov/genomes/all/GCF/000/454/045/GCF_000454045.1_ASM45404v1
GCF_000463355.1	PRJNA224116	SAMN02603659		representative genome	862967	1338	Streptococcus intermedius B196	strain=B196		latest	Complete Genome	Major	Full	2013-09-03	ASM46335v1	National Microbiology Laboratory, Public Health Agency of Canada	GCA_000463355.1	identical	ftp://ftp.ncbi.nlm.nih.gov/genomes/all/GCF/000/463/355/GCF_000463355.1_ASM46335v1
GCF_000463505.1	PRJNA224116	SAMN02603663		representative genome	862971	1328	Streptococcus anginosus C238	strain=C238		latest	Complete Genome	Major	Full	2013-09-03	ASM46350v1	National Microbiology Laboratory, Public Health Agency of Canada	GCA_000463505.1	identical	ftp://ftp.ncbi.nlm.nih.gov/genomes/all/GCF/000/463/505/GCF_000463505.1_ASM46350v1
GCF_000468615.2	PRJNA224116	SAMN02208949		representative genome	1348584	76594	Cellulophaga baltica 18	strain=18		latest	Complete Genome	Major	Full	2014-12-09	ASM46861v2	University of Arizona	GCA_000468615.2	identical	ftp://ftp.ncbi.nlm.nih.gov/genomes/all/GCF/000/468/615/GCF_000468615.2_ASM46861v2
GCF_000470775.1	PRJNA224116	SAMN02603223		representative genome	1389489	1575	Leifsonia xyli subsp. cynodontis DSM 46306	strain=DSM 46306		latest	Complete Genome	Major	Full	2013-09-24	ASM47077v1	ESALQ-USP	GCA_000470775.1	identical	ftp://ftp.ncbi.nlm.nih.gov/genomes/all/GCF/000/470/775/GCF_000470775.1_ASM47077v1		assembly from type material
GCF_000471025.2	PRJNA224116	SAMN02435823		representative genome	1143323	1457153	Chlamydia gallinacea 08-1274/3	strain=08-1274/3		latest	Complete Genome	Major	Full	2016-05-25	ASM47102v2	Insititute for Genome Sciences	GCA_000471025.2	identical	ftp://ftp.ncbi.nlm.nih.gov/genomes/all/GCF/000/471/025/GCF_000471025.2_ASM47102v2		assembly from type material
GCF_000473245.1	PRJNA224116	SAMN02604281		representative genome	1367477	324767	Bacillus infantis NRRL B-14911	strain=NRRL B-14911		latest	Complete Genome	Major	Full	2013-09-30	ASM47324v1	USDA-ARS U.S. Meat Animal Research Center	GCA_000473245.1	identical	ftp://ftp.ncbi.nlm.nih.gov/genomes/all/GCF/000/473/245/GCF_000473245.1_ASM47324v1
GCF_000473995.1	PRJNA224116	SAMN02603278		representative genome	1345695	169679	Clostridium saccharobutylicum DSM 13864	strain=DSM 13864		latest	Complete Genome	Major	Full	2013-10-18	ASM47399v1	Georg-August-University Goettingen, Genomic and Applied Microbiology, Goettingen Genomics Laboratory	GCA_000473995.1	identical	ftp://ftp.ncbi.nlm.nih.gov/genomes/all/GCF/000/473/995/GCF_000473995.1_ASM47399v1		assembly from type material
GCF_000477415.1	PRJNA224116	SAMN02360547		representative genome	1403316	984991	Mycoplasma parvum str. Indiana	strain=Indiana		latest	Complete Genome	Major	Full	2013-10-21	ASM47741v1	Purdue University	GCA_000477415.1	identical	ftp://ftp.ncbi.nlm.nih.gov/genomes/all/GCF/000/477/415/GCF_000477415.1_ASM47741v1
GCF_000478885.1	PRJNA224116	SAMD00061014		representative genome	1384484	446660	Adlercreutzia equolifaciens DSM 19450	strain=DSM 19450		latest	Complete Genome	Major	Full	2013-08-16	ASM47888v1	Azabu University	GCA_000478885.1	identical	ftp://ftp.ncbi.nlm.nih.gov/genomes/all/GCF/000/478/885/GCF_000478885.1_ASM47888v1		assembly from type material
GCF_000484505.1	PRJNA224116	SAMN02358571		representative genome	1341692	84023	Clostridium autoethanogenum DSM 10061	strain=DSM 10061		latest	Complete Genome	Major	Full	2013-10-28	ASM48450v1	Oak Ridge National Lab	GCA_000484505.1	identical	ftp://ftp.ncbi.nlm.nih.gov/genomes/all/GCF/000/484/505/GCF_000484505.1_ASM48450v1		assembly from type material
GCF_000484535.1	PRJNA224116	SAMN02604186		representative genome	1183438	1416614	Gloeobacter kilaueensis JS1	strain=JS1		latest	Complete Genome	Major	Full	2013-10-28	ASM48453v1	University of Hawaii at Manoa	GCA_000484535.1	identical	ftp://ftp.ncbi.nlm.nih.gov/genomes/all/GCF/000/484/535/GCF_000484535.1_ASM48453v1		assembly from type material
GCF_000485905.1	PRJNA224116	SAMN02603231		representative genome	1335757	1335757	Spiribacter curvatus	strain=UAH-SP71		latest	Complete Genome	Major	Full	2013-10-29	ASM48590v1	Evolutionary Genomics Group, Universidad Miguel Hernandez, San Juan de Alicante, Spain	GCA_000485905.1	identical	ftp://ftp.ncbi.nlm.nih.gov/genomes/all/GCF/000/485/905/GCF_000485905.1_ASM48590v1		assembly from type material
GCF_000493735.1	PRJNA224116	SAMN02604179		representative genome	1266845	147709	Carnobacterium inhibens subsp. gilichinskyi	strain=WN1359		latest	Complete Genome	Major	Full	2013-10-29	ASM49373v1	University of Florida	GCA_000493735.1	identical	ftp://ftp.ncbi.nlm.nih.gov/genomes/all/GCF/000/493/735/GCF_000493735.1_ASM49373v1		assembly from type material
GCF_000494755.1	PRJNA224116	SAMN02603031		representative genome	1246995	196914	Actinoplanes friuliensis DSM 7358	strain=DSM 7358		latest	Complete Genome	Major	Full	2013-11-01	ASM49475v1	Bielefeld University	GCA_000494755.1	identical	ftp://ftp.ncbi.nlm.nih.gov/genomes/all/GCF/000/494/755/GCF_000494755.1_ASM49475v1		assembly from type material
GCF_000495935.2	PRJNA224116	SAMN02470988		representative genome	1338011	1117645	Elizabethkingia anophelis NUHP1	strain=NUHP1		latest	Complete Genome	Major	Full	2014-08-27	ASM49593v2	SCELSE	GCA_000495935.2	identical	ftp://ftp.ncbi.nlm.nih.gov/genomes/all/GCF/000/495/935/GCF_000495935.2_ASM49593v2
GCF_000497525.1	PRJNA224116	SAMN02641488		representative genome	529122	1428	Bacillus thuringiensis YBT-1518	strain=YBT-1518		latest	Complete Genome	Major	Full	2013-11-19	ASM49752v2	State Key Laboratory of Agricultural Microbiology, Huazhong Agricultural University	GCA_000497525.2	identical	ftp://ftp.ncbi.nlm.nih.gov/genomes/all/GCF/000/497/525/GCF_000497525.1_ASM49752v2
GCF_000500935.1	PRJNA224116	SAMN02641479		representative genome	1276258	2137	Spiroplasma apis B31	strain=B31		latest	Complete Genome	Major	Full	2013-12-03	ASM50093v1	Academia Sinica	GCA_000500935.1	identical	ftp://ftp.ncbi.nlm.nih.gov/genomes/all/GCF/000/500/935/GCF_000500935.1_ASM50093v1		assembly from type material
GCF_000503895.1	PRJNA224116	SAMN02641510		representative genome	1029756	1427356	Hyphomicrobium nitrativorans NL23	strain=NL23		latest	Complete Genome	Major	Full	2013-12-04	ASM50389v1	INRS-Institut Armand-Frappier	GCA_000503895.1	identical	ftp://ftp.ncbi.nlm.nih.gov/genomes/all/GCF/000/503/895/GCF_000503895.1_ASM50389v1		assembly from type material
GCF_000504125.1	PRJNA224116	SAMD00061063		representative genome	1300150	53346	Enterococcus mundtii QU 25	strain=QU25		latest	Complete Genome	Major	Full	2013-11-19	ASM50412v1	Genome Research Center, NODAI Research Institute, Tokyo University of Agriculture	GCA_000504125.1	identical	ftp://ftp.ncbi.nlm.nih.gov/genomes/all/GCF/000/504/125/GCF_000504125.1_ASM50412v1
GCF_000507245.1	PRJNA224116	SAMN02641517		representative genome	1307761	1307761	Salinispira pacifica	strain=L21-RPul-D2		latest	Complete Genome	Major	Full	2013-12-13	ASM50724v1	Leibniz Institute DSMZ-German Collection of Microorganisms and Cell Cultures	GCA_000507245.1	identical	ftp://ftp.ncbi.nlm.nih.gov/genomes/all/GCF/000/507/245/GCF_000507245.1_ASM50724v1		assembly from type material
GCF_000508225.1	PRJNA224116	SAMN02641637		representative genome	1423892	35795	Ehrlichia muris AS145	strain=AS145		latest	Complete Genome	Major	Full	2013-12-16	ASM50822v1	University of Texas Medical Branch	GCA_000508225.1	identical	ftp://ftp.ncbi.nlm.nih.gov/genomes/all/GCF/000/508/225/GCF_000508225.1_ASM50822v1		assembly from type material
GCF_000508245.1	PRJNA224116	SAMN02641557		representative genome	1415773	171632	Mycoplasma ovis str. Michigan	strain=Michigan		latest	Complete Genome	Major	Full	2013-12-16	ASM50824v1	Purdue University	GCA_000508245.1	identical	ftp://ftp.ncbi.nlm.nih.gov/genomes/all/GCF/000/508/245/GCF_000508245.1_ASM50824v1		assembly designated as reftype
GCF_000511305.1	PRJNA224116	SAMN02641478		representative genome	1435356	103816	Rhodococcus pyridinivorans SB3094	strain=SB3094		latest	Complete Genome	Major	Full	2013-12-20	ASM51130v1	Aalborg University	GCA_000511305.1	identical	ftp://ftp.ncbi.nlm.nih.gov/genomes/all/GCF/000/511/305/GCF_000511305.1_ASM51130v1
GCF_000511355.1	PRJNA224116	SAMN02769646		representative genome	999552	133924	Leisingera methylohalidivorans DSM 14336	strain=DSM 14336; MB2		latest	Complete Genome	Major	Full	2013-12-20	ASM51135v1	DOE Joint Genome Institute	GCA_000511355.1	identical	ftp://ftp.ncbi.nlm.nih.gov/genomes/all/GCF/000/511/355/GCF_000511355.1_ASM51135v1		assembly from type material
GCF_000511385.1	PRJNA224116	SAMN02641497		representative genome	1423144	60890	Phaeobacter gallaeciensis DSM 26640	strain=DSM 26640		latest	Complete Genome	Major	Full	2013-12-20	ASM51138v1	DSMZ	GCA_000511385.1	identical	ftp://ftp.ncbi.nlm.nih.gov/genomes/all/GCF/000/511/385/GCF_000511385.1_ASM51138v1		assembly from type material
GCF_000512205.2	PRJNA224116	SAMN02641489		representative genome	1123269	397260	Sphingomonas sanxanigenens DSM 19645 = NX02	strain=NX02		latest	Complete Genome	Major	Full	2015-05-15	ASM51220v2	Nankai University	GCA_000512205.2	identical	ftp://ftp.ncbi.nlm.nih.gov/genomes/all/GCF/000/512/205/GCF_000512205.2_ASM51220v2		assembly from type material
GCF_000512355.1	PRJNA224116	SAMN02641506		representative genome	1268635	29423	Legionella oakridgensis ATCC 33761 = DSM 21215	strain=ATCC 33761 = DSM 21215; OR-10		latest	Complete Genome	Major	Full	2013-12-31	ASM51235v1	Georg-August-University of Goettingen, Genomics and Applied Microbiology, G√∂ttinger Genomics Laboratory	GCA_000512355.1	identical	ftp://ftp.ncbi.nlm.nih.gov/genomes/all/GCF/000/512/355/GCF_000512355.1_ASM51235v1		assembly from type material
GCF_000512735.1	PRJNA224116	SAMN02769647		representative genome	75906	75906	Thermocrinis ruber	strain=DSM 23557		latest	Complete Genome	Major	Full	2014-01-03	ASM51273v1	JGI	GCA_000512735.1	identical	ftp://ftp.ncbi.nlm.nih.gov/genomes/all/GCF/000/512/735/GCF_000512735.1_ASM51273v1		assembly from type material
GCF_000512895.1	PRJNA224116	SAMN02769648		representative genome	871738	55583	Dehalobacter restrictus DSM 9455	strain=PER-K23; DSM 9455		latest	Complete Genome	Major	Full	2014-01-03	ASM51289v1	DOE Joint Genome Institute	GCA_000512895.1	identical	ftp://ftp.ncbi.nlm.nih.gov/genomes/all/GCF/000/512/895/GCF_000512895.1_ASM51289v1		assembly from type material
GCF_000512915.1	PRJNA224116	SAMN02769649		representative genome	880074	397865	Barnesiella viscericola DSM 18177	strain=C46, DSM 18177		latest	Complete Genome	Major	Full	2014-01-03	ASM51291v1	JGI	GCA_000512915.1	identical	ftp://ftp.ncbi.nlm.nih.gov/genomes/all/GCF/000/512/915/GCF_000512915.1_ASM51291v1		assembly from type material
GCF_000517425.1	PRJNA224116	SAMN02641639		representative genome	1239307	1239307	Sodalis praecaptivus	strain=HS1		latest	Complete Genome	Major	Full	2014-01-10	ASM51742v1	University of Utah	GCA_000517425.1	identical	ftp://ftp.ncbi.nlm.nih.gov/genomes/all/GCF/000/517/425/GCF_000517425.1_ASM51742v1
GCF_000517445.1	PRJNA224116	SAMN03081513		representative genome	582419	582419	Thermococcus paralvinellae	strain=ES1		latest	Complete Genome	Major	Full	2014-01-10	ASM51744v1	Kyung Hee University	GCA_000517445.1	identical	ftp://ftp.ncbi.nlm.nih.gov/genomes/all/GCF/000/517/445/GCF_000517445.1_ASM51744v1		assembly from type material
GCF_000517565.1	PRJNA224116	SAMN02769651		representative genome	694431	33002	Desulfurella acetivorans A63	strain=A63		latest	Complete Genome	Major	Full	2014-01-13	ASM51756v1	JGI	GCA_000517565.1	identical	ftp://ftp.ncbi.nlm.nih.gov/genomes/all/GCF/000/517/565/GCF_000517565.1_ASM51756v1		assembly from type material
GCF_000517605.1	PRJNA224116	SAMN02769650		representative genome	754523	384	Rhizobium leguminosarum bv. trifolii WSM1689	strain=WSM1689		latest	Complete Genome	Major	Full	2014-01-13	ASM51760v1	DOE Joint Genome Institute	GCA_000517605.1	identical	ftp://ftp.ncbi.nlm.nih.gov/genomes/all/GCF/000/517/605/GCF_000517605.1_ASM51760v1
GCF_000517625.1	PRJNA224116	SAMN00117518		representative genome	797299	353800	Halostagnicola larsenii XH-48	strain=XH-48		latest	Complete Genome	Major	Full	2014-01-13	ASM51762v1	JGI	GCA_000517625.1	identical	ftp://ftp.ncbi.nlm.nih.gov/genomes/all/GCF/000/517/625/GCF_000517625.1_ASM51762v1		assembly from type material
GCF_000521505.1	PRJNA224116	SAMN02641504		representative genome	1247726	302406	Advenella mimigardefordensis DPN7	strain=DPN7		latest	Complete Genome	Major	Full	2014-01-22	ASM52150v1	Georg-August-University Goettingen, Genomic and Applied Microbiology, Goettingen Genomics Laboratory	GCA_000521505.1	identical	ftp://ftp.ncbi.nlm.nih.gov/genomes/all/GCF/000/521/505/GCF_000521505.1_ASM52150v1		assembly from type material
GCF_000521565.1	PRJNA224116	SAMN02641631		representative genome	1009858	9	Buchnera aphidicola str. G002 (Myzus persicae)	strain=G002		latest	Complete Genome	Major	Full	2014-01-22	ASM52156v1	University of Miami	GCA_000521565.1	identical	ftp://ftp.ncbi.nlm.nih.gov/genomes/all/GCF/000/521/565/GCF_000521565.1_ASM52156v1
GCF_000523235.1	PRJNA224116	SAMN02641505		representative genome	1415166	37330	Nocardia nova SH22a	strain=SH22a		latest	Complete Genome	Major	Full	2014-01-27	ASM52323v1	Georg-August-University Goettingen, Genomic and Applied Microbiology, Goettingen Genomics Laboratory	GCA_000523235.1	identical	ftp://ftp.ncbi.nlm.nih.gov/genomes/all/GCF/000/523/235/GCF_000523235.1_ASM52323v1
GCF_000524555.1	PRJNA224116	SAMN02641634		representative genome	743966	45362	Mycoplasma bovoculi M165/69	strain=M165/69		latest	Complete Genome	Major	Full	2014-01-30	ASM52455v1	University of Missouri	GCA_000524555.1	identical	ftp://ftp.ncbi.nlm.nih.gov/genomes/all/GCF/000/524/555/GCF_000524555.1_ASM52455v1		assembly from type material
GCF_000525635.1	PRJNA224116	SAMN02641507		representative genome	1449976	43357	Kutzneria albida DSM 43870	strain=DSM 43870		latest	Complete Genome	Major	Full	2014-02-03	ASM52563v1	Helmholtz Institute for Pharmaceutical Research Saarland, Helmholtz Centre for Infection Research	GCA_000525635.1	identical	ftp://ftp.ncbi.nlm.nih.gov/genomes/all/GCF/000/525/635/GCF_000525635.1_ASM52563v1		assembly from type material
GCF_000525655.1	PRJNA224116	SAMN02641485		representative genome	1451189	108486	Corynebacterium falsenii DSM 44353	strain=BL 8171		latest	Complete Genome	Major	Full	2014-02-03	ASM52565v1	Bielefeld University	GCA_000525655.1	identical	ftp://ftp.ncbi.nlm.nih.gov/genomes/all/GCF/000/525/655/GCF_000525655.1_ASM52565v1		assembly from type material
GCF_000525675.1	PRJNA224116	SAMN03081425		representative genome	765869	959	Bdellovibrio bacteriovorus W	strain=W		latest	Complete Genome	Major	Full	2014-02-03	ASM52567v1	University of Oklahoma Health Sciences center	GCA_000525675.1	identical	ftp://ftp.ncbi.nlm.nih.gov/genomes/all/GCF/000/525/675/GCF_000525675.1_ASM52567v1
GCF_000550765.1	PRJNA224116	SAMN03081456		representative genome	1296990	28448	Komagataeibacter xylinus E25	strain=E25		latest	Complete Genome	Major	Full	2014-02-05	ASM55076v1	Genomed SA	GCA_000550765.1	identical	ftp://ftp.ncbi.nlm.nih.gov/genomes/all/GCF/000/550/765/GCF_000550765.1_ASM55076v1
GCF_000550785.1	PRJNA224116	SAMN03081454		representative genome	1285583	160386	Corynebacterium casei LMG S-19264	strain=LMG S-19264		latest	Complete Genome	Major	Full	2014-02-05	ASM55078v1	CeBiTec, Bielefeld University	GCA_000550785.1	identical	ftp://ftp.ncbi.nlm.nih.gov/genomes/all/GCF/000/550/785/GCF_000550785.1_ASM55078v1		assembly from type material
GCF_000550805.1	PRJNA224116	SAMN03081455		representative genome	1224164	38305	Corynebacterium vitaeruminis DSM 20294	strain=DSM 20294		latest	Complete Genome	Major	Full	2014-02-05	ASM55080v1	CeBiTec, Bielefeld University	GCA_000550805.1	identical	ftp://ftp.ncbi.nlm.nih.gov/genomes/all/GCF/000/550/805/GCF_000550805.1_ASM55080v1		assembly from type material
GCF_000565175.1	PRJNA224116	SAMN03081474		representative genome	1276246	216935	Spiroplasma culicicola AES-1	strain=AES-1		latest	Complete Genome	Major	Full	2014-02-07	ASM56517v1	Academia Sinica	GCA_000565175.1	identical	ftp://ftp.ncbi.nlm.nih.gov/genomes/all/GCF/000/565/175/GCF_000565175.1_ASM56517v1		assembly from type material
GCF_000565195.1	PRJNA224116	SAMN03081484		representative genome	838561	2144	Spiroplasma mirum ATCC 29335	strain=SMCA		latest	Complete Genome	Major	Full	2014-02-07	ASM56519v1	Louisiana State Universtiy	GCA_000565195.1	identical	ftp://ftp.ncbi.nlm.nih.gov/genomes/all/GCF/000/565/195/GCF_000565195.1_ASM56519v1		assembly from type material
GCF_000565215.1	PRJNA224116	SAMN03081504		representative genome	1276257	216944	Spiroplasma sabaudiense Ar-1343	strain=Ar-1343		latest	Complete Genome	Major	Full	2014-02-07	ASM56521v1	Academia Sinica	GCA_000565215.1	identical	ftp://ftp.ncbi.nlm.nih.gov/genomes/all/GCF/000/565/215/GCF_000565215.1_ASM56521v1		assembly from type material
GCF_000568815.1	PRJNA224116	SAMN03081532		representative genome	1150621	66821	Sulfurospirillum multivorans DSM 12446	strain=DSM 12446		latest	Complete Genome	Major	Full	2014-02-13	ASM56881v1	Friedrich-Schiller-University of Jena	GCA_000568815.1	identical	ftp://ftp.ncbi.nlm.nih.gov/genomes/all/GCF/000/568/815/GCF_000568815.1_ASM56881v1		assembly from type material
GCF_000576555.1	PRJNA224116	SAMN03081528		representative genome	1227739	1446467	Hymenobacter swuensis DY53	strain=DY53		latest	Complete Genome	Major	Full	2014-02-24	ASM57655v1	Korea Atomic Energy Research Institute	GCA_000576555.1	identical	ftp://ftp.ncbi.nlm.nih.gov/genomes/all/GCF/000/576/555/GCF_000576555.1_ASM57655v1		assembly from type material
GCF_000583875.1	PRJNA224116	SAMN02216823		representative genome	1229831	1457141	Chlamydia avium 10DC88	strain=10DC88	10DC88	latest	Complete Genome	Major	Full	2014-03-03	ASM58387v1	Friedrich-Loeffler-Institut	GCA_000583875.1	identical	ftp://ftp.ncbi.nlm.nih.gov/genomes/all/GCF/000/583/875/GCF_000583875.1_ASM58387v1		assembly from type material
GCF_000585495.1	PRJNA224116	SAMN03081537		representative genome	195522	195522	Thermococcus nautili	strain=30-1		latest	Complete Genome	Major	Full	2014-03-05	ASM58549v1	Institute de Genetique et Microbiologie	GCA_000585495.1	identical	ftp://ftp.ncbi.nlm.nih.gov/genomes/all/GCF/000/585/495/GCF_000585495.1_ASM58549v1		assembly from type material
GCF_000590475.1	PRJNA224116	SAMN02673421		representative genome	316	316	Pseudomonas stutzeri	strain=28a24		latest	Complete Genome	Major	Full	2014-03-12	ASM59047v1	University of Arizona	GCA_000590475.1	identical	ftp://ftp.ncbi.nlm.nih.gov/genomes/all/GCF/000/590/475/GCF_000590475.1_ASM59047v1
GCF_000590555.1	PRJNA224116	SAMN02603032		representative genome	1348662	42817	Corynebacterium argentoratense DSM 44202	strain=DSM 44202		latest	Complete Genome	Major	Full	2013-08-27	ASM59055v1	Bielefeld University	GCA_000590555.1	identical	ftp://ftp.ncbi.nlm.nih.gov/genomes/all/GCF/000/590/555/GCF_000590555.1_ASM59055v1		assembly from type material
GCF_000590925.1	PRJNA224116	SAMN03081458		representative genome	1294273	159346	Roseibacterium elongatum DSM 19469	strain=DFL-43		latest	Complete Genome	Major	Full	2014-03-14	ASM59092v1	Roseobacter SFB	GCA_000590925.1	identical	ftp://ftp.ncbi.nlm.nih.gov/genomes/all/GCF/000/590/925/GCF_000590925.1_ASM59092v1		assembly from type material
GCF_000591055.1	PRJNA224116	SAMEA3138954		representative genome	268739	416273	Natronomonas moolapensis 8.8.11	strain=8.8.11		latest	Complete Genome	Major	Full	2013-02-21	ASM59105v1	Max-Planck-Institute of Biochemistry	GCA_000591055.1	identical	ftp://ftp.ncbi.nlm.nih.gov/genomes/all/GCF/000/591/055/GCF_000591055.1_ASM59105v1		assembly from type material
GCF_000597865.1	PRJNA224116	SAMN02689753		representative genome	1286171	1731	Peptoclostridium acidaminophilum DSM 3953	strain=DSM 3953		latest	Complete Genome	Major	Full	2014-03-19	ASM59786v1	Georg-August-University Goettingen, Genomic and Applied Microbiology, Goettingen Genomics Laboratory	GCA_000597865.1	identical	ftp://ftp.ncbi.nlm.nih.gov/genomes/all/GCF/000/597/865/GCF_000597865.1_ASM59786v1		assembly from type material
GCF_000599985.1	PRJNA224116	SAMN03081539		representative genome	1196095	1196095	Gilliamella apicola	strain=wkB1		latest	Complete Genome	Major	Full	2014-03-25	ASM59998v1	Yale University	GCA_000599985.1	identical	ftp://ftp.ncbi.nlm.nih.gov/genomes/all/GCF/000/599/985/GCF_000599985.1_ASM59998v1		assembly from type material
GCF_000600005.1	PRJNA224116	SAMN03081540		representative genome	1196094	1196083	Snodgrassella alvi wkB2	strain=wkB2		latest	Complete Genome	Major	Full	2014-03-25	ASM60000v1	Yale University	GCA_000600005.1	identical	ftp://ftp.ncbi.nlm.nih.gov/genomes/all/GCF/000/600/005/GCF_000600005.1_ASM60000v1		assembly from type material
GCF_000604125.1	PRJNA224116	SAMN03081438		representative genome	1095955	160	Treponema pallidum subsp. pallidum str. Sea 81-4	strain=Sea 81-4		latest	Complete Genome	Major	Full	2014-03-28	ASM60412v1	University of Washington	GCA_000604125.1	identical	ftp://ftp.ncbi.nlm.nih.gov/genomes/all/GCF/000/604/125/GCF_000604125.1_ASM60412v1
GCF_000612055.1	PRJNA224116	SAMN02689492		representative genome	1661	1661	Trueperella pyogenes	strain=TP6375		latest	Complete Genome	Major	Full	2014-04-02	ASM61205v1	Cornell University	GCA_000612055.1	identical	ftp://ftp.ncbi.nlm.nih.gov/genomes/all/GCF/000/612/055/GCF_000612055.1_ASM61205v1
GCF_000612485.1	PRJNA224116	SAMN02189846		representative genome	1247649	35814	Bordetella holmesii ATCC 51541	strain=ATCC 51541		latest	Complete Genome	Major	Full	2014-04-04	ASM61248v1	Institute for Genome Sciences	GCA_000612485.1	identical	ftp://ftp.ncbi.nlm.nih.gov/genomes/all/GCF/000/612/485/GCF_000612485.1_ASM61248v1		assembly from type material
GCF_000619905.2	PRJNA224116	SAMN02744081		representative genome	1266925	35799	Nitrosospira briensis C-128	strain=C-128		latest	Complete Genome	Major	Full	2015-08-14	ASM61990v2	DOE Joint Genome Institute	GCA_000619905.2	identical	ftp://ftp.ncbi.nlm.nih.gov/genomes/all/GCF/000/619/905/GCF_000619905.2_ASM61990v2		assembly designated as reftype
GCF_000626635.1	PRJNA224116	SAMN02725840		representative genome	1168034	1168034	Draconibacterium orientale	strain=FH5		latest	Complete Genome	Major	Full	2014-04-11	ASM62663v1	Shandong University at Weihai	GCA_000626635.1	identical	ftp://ftp.ncbi.nlm.nih.gov/genomes/all/GCF/000/626/635/GCF_000626635.1_ASM62663v1		assembly from type material
GCF_000626675.1	PRJNA224116	SAMN03081498		representative genome	1404245	1404244	Corynebacterium glyciniphilum AJ 3170	strain=AJ 3170		latest	Complete Genome	Major	Full	2014-04-11	ASM62667v1	Bielefeld University	GCA_000626675.1	identical	ftp://ftp.ncbi.nlm.nih.gov/genomes/all/GCF/000/626/675/GCF_000626675.1_ASM62667v1		assembly from type material
GCF_000632985.1	PRJNA224116	SAMN02367297		representative genome	1286528	33994	Neorickettsia helminthoeca str. Oregon	strain=Oregon		latest	Complete Genome	Major	Full	2014-04-17	ASM63298v1	IGS	GCA_000632985.1	identical	ftp://ftp.ncbi.nlm.nih.gov/genomes/all/GCF/000/632/985/GCF_000632985.1_ASM63298v1		assembly designated as reftype
GCF_000635915.2	PRJNA224116	SAMN02693465		representative genome	588932	588932	Brevundimonas naejangsanensis	strain=B1		latest	Complete Genome	Major	Full	2016-05-19	ASM63591v2	Beijing University of Chemical Technology	GCA_000635915.2	identical	ftp://ftp.ncbi.nlm.nih.gov/genomes/all/GCF/000/635/915/GCF_000635915.2_ASM63591v2
GCF_000648515.1	PRJNA224116	SAMN02713684		representative genome	1333848	546	Citrobacter freundii CFNIH1	strain=CFNIH1		latest	Complete Genome	Major	Full	2014-04-28	ASM64851v1	NISC	GCA_000648515.1	identical	ftp://ftp.ncbi.nlm.nih.gov/genomes/all/GCF/000/648/515/GCF_000648515.1_ASM64851v1
GCF_000661895.1	PRJNA224116	SAMN02708830		representative genome	42256	42256	Rubrobacter radiotolerans	strain=RSPS-4		latest	Complete Genome	Major	Full	2014-05-01	ASM66189v1	Biocant	GCA_000661895.1	identical	ftp://ftp.ncbi.nlm.nih.gov/genomes/all/GCF/000/661/895/GCF_000661895.1_ASM66189v1
GCF_000695095.2	PRJNA224116	SAMN02296694		representative genome	1379270	1379270	Gemmatimonas phototrophica	strain=AP64		latest	Complete Genome	Major	Full	2016-04-06	ASM69509v2	Institute of Microbiology ASCR	GCA_000695095.2	identical	ftp://ftp.ncbi.nlm.nih.gov/genomes/all/GCF/000/695/095/GCF_000695095.2_ASM69509v2		assembly from type material
GCF_000695835.1	PRJNA224116	SAMN02708703		representative genome	2113	2113	Mycoplasma californicum	strain=ST-6		latest	Complete Genome	Major	Full	2014-05-27	ASM69583v1	University of Missouri - Columbia	GCA_000695835.1	identical	ftp://ftp.ncbi.nlm.nih.gov/genomes/all/GCF/000/695/835/GCF_000695835.1_ASM69583v1		assembly from type material
GCF_000696485.1	PRJNA224116	SAMN02798098		representative genome	213554	213554	Halomonas campaniensis	strain=LS21		latest	Complete Genome	Major	Full	2014-05-30	ASM69648v1	Tsinghua University	GCA_000696485.1	identical	ftp://ftp.ncbi.nlm.nih.gov/genomes/all/GCF/000/696/485/GCF_000696485.1_ASM69648v1
GCF_000697965.2	PRJNA224116	SAMN02781308		representative genome	106592	106592	Ensifer adhaerens	strain=Casida A		latest	Complete Genome	Major	Full	2016-06-16	ASM69796v2	University of Arizona	GCA_000697965.2	identical	ftp://ftp.ncbi.nlm.nih.gov/genomes/all/GCF/000/697/965/GCF_000697965.2_ASM69796v2		assembly from type material
GCF_000698785.1	PRJNA224116	SAMN02721150		representative genome	926571	1034015	Nitrososphaera viennensis EN76	strain=EN76		latest	Complete Genome	Major	Full	2014-06-06	ASM69878v1	University of Vienna	GCA_000698785.1	identical	ftp://ftp.ncbi.nlm.nih.gov/genomes/all/GCF/000/698/785/GCF_000698785.1_ASM69878v1		assembly from type material
GCF_000699505.1	PRJNA224116	SAMN02848463		representative genome	529884	529884	Rhodoluna lacicola	strain=MWH-Ta8		latest	Complete Genome	Major	Full	2014-06-09	ASM69950v1	University of Innsbruck	GCA_000699505.1	identical	ftp://ftp.ncbi.nlm.nih.gov/genomes/all/GCF/000/699/505/GCF_000699505.1_ASM69950v1		assembly from type material
GCF_000706685.1	PRJNA224116	SAMN02639856		representative genome	1288	1288	Staphylococcus xylosus	strain=HKUOPL8		latest	Complete Genome	Major	Full	2014-06-13	ASM70668v1	University of Hong Kong	GCA_000706685.1	identical	ftp://ftp.ncbi.nlm.nih.gov/genomes/all/GCF/000/706/685/GCF_000706685.1_ASM70668v1
GCF_000724485.1	PRJNA224116	SAMN02899989		representative genome	796606	1471	Bacillus methanolicus MGA3	strain=MGA3		latest	Complete Genome	Major	Full	2014-07-09	ASM72448v1	Bielefeld University	GCA_000724485.1	identical	ftp://ftp.ncbi.nlm.nih.gov/genomes/all/GCF/000/724/485/GCF_000724485.1_ASM72448v1
GCF_000724605.1	PRJNA224116	SAMN02900471		representative genome	59505	59505	Actinotignum schaalii	strain=CCUG 27420		latest	Complete Genome	Major	Full	2014-07-10	ASM72460v1	Aalborg University	GCA_000724605.1	identical	ftp://ftp.ncbi.nlm.nih.gov/genomes/all/GCF/000/724/605/GCF_000724605.1_ASM72460v1		assembly from type material
GCF_000724625.1	PRJNA224116	SAMN02641501		representative genome	661478	1005039	Fimbriimonas ginsengisoli Gsoil 348	strain=Gsoil 348		latest	Complete Genome	Major	Full	2014-07-10	ASM72462v1	Department of Microbiology and Microbial Engineering, School of Life Sciences, Fudan University	GCA_000724625.1	identical	ftp://ftp.ncbi.nlm.nih.gov/genomes/all/GCF/000/724/625/GCF_000724625.1_ASM72462v1		assembly from type material
GCF_000724775.3	PRJNA224116	SAMN02892976		representative genome	28031	28031	Lysinibacillus fusiformis	strain=RB-21		latest	Complete Genome	Minor	Full	2015-02-10	ASM72477v3	University of Malaya	GCA_000724775.3	identical	ftp://ftp.ncbi.nlm.nih.gov/genomes/all/GCF/000/724/775/GCF_000724775.3_ASM72477v3
GCF_000725365.1	PRJNA224116	SAMN02864241		representative genome	386490	386490	Terribacillus goriensis	strain=MP602		latest	Complete Genome	Major	Full	2014-07-14	ASM72536v1	Zhejiang Agricultural and Forestry University	GCA_000725365.1	identical	ftp://ftp.ncbi.nlm.nih.gov/genomes/all/GCF/000/725/365/GCF_000725365.1_ASM72536v1
GCF_000725405.1	PRJNA224116	SAMN02902417		representative genome	1274	1274	Dermacoccus nishinomiyaensis	strain=M25		latest	Complete Genome	Major	Full	2014-07-14	ASM72540v1	University of Malaya	GCA_000725405.1	identical	ftp://ftp.ncbi.nlm.nih.gov/genomes/all/GCF/000/725/405/GCF_000725405.1_ASM72540v1
GCF_000725425.1	PRJNA224116	SAMN03081469		representative genome	1343739	971279	Palaeococcus pacificus DY20341	strain=DY20341		latest	Complete Genome	Major	Full	2014-07-14	ASM72542v1	The third institute of oceanography of SOA,PRChina	GCA_000725425.1	identical	ftp://ftp.ncbi.nlm.nih.gov/genomes/all/GCF/000/725/425/GCF_000725425.1_ASM72542v1		assembly from type material
GCF_000730165.1	PRJNA224116	SAMN02689882		representative genome	1441467	28077	Nitrospirillum amazonense CBAmc	strain=CBAmC		latest	Complete Genome	Major	Full	2017-06-30	ASM73016v2	Embrapa	GCA_000730165.2	identical	ftp://ftp.ncbi.nlm.nih.gov/genomes/all/GCF/000/730/165/GCF_000730165.1_ASM73016v2
GCF_000730385.1	PRJNA224116	SAMN02743545		representative genome	589873	589873	Alteromonas australica	strain=H 17		latest	Complete Genome	Major	Full	2014-07-17	ASM73038v1	University Miguel Hernandez	GCA_000730385.1	identical	ftp://ftp.ncbi.nlm.nih.gov/genomes/all/GCF/000/730/385/GCF_000730385.1_ASM73038v1		assembly from type material
GCF_000732925.1	PRJNA224116	SAMN02836828		representative genome	208439	208439	Amycolatopsis japonica	strain=MG417-CF17		latest	Complete Genome	Major	Full	2014-07-24	ASM73292v1	Bielefeld University	GCA_000732925.1	identical	ftp://ftp.ncbi.nlm.nih.gov/genomes/all/GCF/000/732/925/GCF_000732925.1_ASM73292v1		assembly from type material
GCF_000732945.1	PRJNA224116	SAMN02911287		representative genome	191610	191610	Corynebacterium atypicum	strain=R2070		latest	Complete Genome	Major	Full	2014-07-24	ASM73294v1	Bielefeld University	GCA_000732945.1	identical	ftp://ftp.ncbi.nlm.nih.gov/genomes/all/GCF/000/732/945/GCF_000732945.1_ASM73294v1		assembly from type material
GCF_000734015.1	PRJNA224116	SAMN02934663		representative genome	289377	1741	Thermodesulfobacterium commune DSM 2178	strain=DSM 2178		latest	Complete Genome	Major	Full	2014-07-28	ASM73401v1	TIGR	GCA_000734015.1	identical	ftp://ftp.ncbi.nlm.nih.gov/genomes/all/GCF/000/734/015/GCF_000734015.1_ASM73401v1		assembly from type material
GCF_000736415.1	PRJNA224116	SAMN02929694		representative genome	1244531	1244531	Campylobacter iguaniorum	strain=1485E		latest	Complete Genome	Major	Full	2014-07-30	ASM73641v1	Utrecht University	GCA_000736415.1	identical	ftp://ftp.ncbi.nlm.nih.gov/genomes/all/GCF/000/736/415/GCF_000736415.1_ASM73641v1		assembly from type material
GCF_000737325.1	PRJNA224116	SAMN02719577		representative genome	927083	927083	Sandaracinus amylolyticus	strain=DSM 53668		latest	Complete Genome	Major	Full	2015-05-01	ASM73732v2	Dr. Srikrishna Subramanian, Protein Science and Engineering, Institute of Microbial Technology, Chandigarh, India	GCA_000737325.2	identical	ftp://ftp.ncbi.nlm.nih.gov/genomes/all/GCF/000/737/325/GCF_000737325.1_ASM73732v2		assembly from type material
GCF_000737865.1	PRJNA224116	SAMN02666223		representative genome	1687	1687	Bifidobacterium coryneforme	strain=LMG18911		latest	Complete Genome	Major	Full	2014-08-05	ASM73786v1	University of Parma	GCA_000737865.1	identical	ftp://ftp.ncbi.nlm.nih.gov/genomes/all/GCF/000/737/865/GCF_000737865.1_ASM73786v1		assembly from type material
GCF_000739065.1	PRJNA224116	SAMN02951366		representative genome	1301915	1301915	Methanocaldococcus bathoardescens	strain=JH146		latest	Complete Genome	Major	Full	2014-08-12	ASM73906v1	Kyung Hee University	GCA_000739065.1	identical	ftp://ftp.ncbi.nlm.nih.gov/genomes/all/GCF/000/739/065/GCF_000739065.1_ASM73906v1		assembly from type material
GCF_000739085.1	PRJNA224116	SAMN02777954		representative genome	1068978	1814	Amycolatopsis methanolica 239	strain=239		latest	Complete Genome	Major	Full	2014-08-12	ASM73908v1	Chinese National Human Genome Center at Shanghai	GCA_000739085.1	identical	ftp://ftp.ncbi.nlm.nih.gov/genomes/all/GCF/000/739/085/GCF_000739085.1_ASM73908v1		assembly from type material
GCF_000739375.1	PRJNA224116	SAMN03081477		representative genome	1392005	285	Comamonas testosteroni TK102	strain=TK102		latest	Complete Genome	Major	Full	2014-08-14	ASM73937v1	Shizuoka University	GCA_000739375.1	identical	ftp://ftp.ncbi.nlm.nih.gov/genomes/all/GCF/000/739/375/GCF_000739375.1_ASM73937v1
GCF_000739435.1	PRJNA224116	SAMN01918029		representative genome	743972	716	Actinobacillus suis ATCC 33415	strain=ATCC 33415		latest	Complete Genome	Major	Full	2014-08-14	ASM73943v1	University of Missouri	GCA_000739435.1	identical	ftp://ftp.ncbi.nlm.nih.gov/genomes/all/GCF/000/739/435/GCF_000739435.1_ASM73943v1		assembly from type material
GCF_000739455.1	PRJNA224116	SAMN02950575		representative genome	156978	156978	Corynebacterium imitans	strain=DSM 44264		latest	Complete Genome	Major	Full	2014-08-14	ASM73945v1	Bielefeld University	GCA_000739455.1	identical	ftp://ftp.ncbi.nlm.nih.gov/genomes/all/GCF/000/739/455/GCF_000739455.1_ASM73945v1		assembly from type material
GCF_000739475.1	PRJNA224116	SAMN02374895		representative genome	1398491	62088	Borreliella valaisiana Tom4006	strain=Tom4006		latest	Complete Genome	Major	Full	2014-08-14	ASM73947v1	Institute of chemical biology and fundamental medicine SB RAS	GCA_000739475.1	identical	ftp://ftp.ncbi.nlm.nih.gov/genomes/all/GCF/000/739/475/GCF_000739475.1_ASM73947v1
GCF_000740895.1	PRJNA260532	SAMD00067076		representative genome	869250	68886	Theileria orientalis strain Shintoku	strain=Shintoku		latest	Complete Genome	Major	Full	2012-09-05	ASM74089v1	Research Center for Zoonosis Control, Hokkaido University	GCA_000740895.1	identical	ftp://ftp.ncbi.nlm.nih.gov/genomes/all/GCF/000/740/895/GCF_000740895.1_ASM74089v1
GCF_000743945.1	PRJNA224116	SAMN02940631		representative genome	1072685	1472345	Basilea psittacipulmonis DSM 24701	strain=DSM 24701		latest	Complete Genome	Major	Full	2014-08-27	ASM74394v1	Geneva University Hospitals	GCA_000743945.1	identical	ftp://ftp.ncbi.nlm.nih.gov/genomes/all/GCF/000/743/945/GCF_000743945.1_ASM74394v1		assembly from type material
GCF_000746645.1	PRJNA224116	SAMN02940899		representative genome	470	470	Acinetobacter baumannii	strain=AB030		latest	Complete Genome	Major	Full	2014-08-29	ASM74664v1	University of Manitoba	GCA_000746645.1	identical	ftp://ftp.ncbi.nlm.nih.gov/genomes/all/GCF/000/746/645/GCF_000746645.1_ASM74664v1
GCF_000747315.1	PRJNA224116	SAMN02953970		representative genome	401472	401472	Corynebacterium ureicelerivorans	strain=IMMIB RIV-2301		latest	Complete Genome	Major	Full	2014-09-03	ASM74731v1	Bielefeld University	GCA_000747315.1	identical	ftp://ftp.ncbi.nlm.nih.gov/genomes/all/GCF/000/747/315/GCF_000747315.1_ASM74731v1		assembly from type material
GCF_000747585.1	PRJNA224116	SAMN05771071		representative genome	1385937	33970	Melissococcus plutonius S1	strain=S1		latest	Complete Genome	Major	Full	2014-09-04	ASM74758v1	Georg-August-University Goettingen, Genomic and Applied Microbiology, Goettingen Genomics Laboratory	GCA_000747585.1	identical	ftp://ftp.ncbi.nlm.nih.gov/genomes/all/GCF/000/747/585/GCF_000747585.1_ASM74758v1
GCF_000750535.1	PRJNA224116	SAMN02947896		representative genome	759620	759620	Weissella ceti	strain=WS105		latest	Complete Genome	Major	Full	2014-09-09	ASM75053v1	Universidade Federal de Minas Gerais	GCA_000750535.1	identical	ftp://ftp.ncbi.nlm.nih.gov/genomes/all/GCF/000/750/535/GCF_000750535.1_ASM75053v1
GCF_000754275.1	PRJNA224116	SAMN02904551		representative genome	747	747	Pasteurella multocida	strain=ATCC 43137		latest	Complete Genome	Major	Full	2014-09-12	ASM75427v1	Los Alamos National Laboratory	GCA_000754275.1	identical	ftp://ftp.ncbi.nlm.nih.gov/genomes/all/GCF/000/754/275/GCF_000754275.1_ASM75427v1		assembly from type material
GCF_000755145.1	PRJNA224116	SAMN02980915		representative genome	221027	221027	Treponema putidum	strain=OMZ 758		latest	Complete Genome	Major	Full	2014-09-16	ASM75514v1	The University of Hong Kong	GCA_000755145.1	identical	ftp://ftp.ncbi.nlm.nih.gov/genomes/all/GCF/000/755/145/GCF_000755145.1_ASM75514v1		assembly from type material
GCF_000756615.1	PRJNA224116	SAMN03010338		representative genome	44251	44251	Paenibacillus durus	strain=DSM 1735		latest	Complete Genome	Major	Full	2014-09-22	ASM75661v1	Cornell University	GCA_000756615.1	identical	ftp://ftp.ncbi.nlm.nih.gov/genomes/all/GCF/000/756/615/GCF_000756615.1_ASM75661v1		assembly from type material
GCF_000757785.1	PRJNA224116	SAMN03031196		representative genome	61647	61647	Pluralibacter gergoviae	strain=FB2		latest	Complete Genome	Major	Full	2014-09-25	ASM75778v1	University of Malaya	GCA_000757785.1	identical	ftp://ftp.ncbi.nlm.nih.gov/genomes/all/GCF/000/757/785/GCF_000757785.1_ASM75778v1
GCF_000757825.1	PRJNA224116	SAMN03003593		representative genome	158822	158822	Cedecea neteri	strain=SSMD04		latest	Complete Genome	Major	Full	2014-09-25	ASM75782v1	University of Malaya	GCA_000757825.1	identical	ftp://ftp.ncbi.nlm.nih.gov/genomes/all/GCF/000/757/825/GCF_000757825.1_ASM75782v1
GCF_000758665.1	PRJNA224116	SAMN02996607		representative genome	160799	160799	Paenibacillus borealis	strain=DSM 13188		latest	Complete Genome	Major	Full	2014-09-22	ASM75866v1	Cornell University	GCA_000758665.1	identical	ftp://ftp.ncbi.nlm.nih.gov/genomes/all/GCF/000/758/665/GCF_000758665.1_ASM75866v1		assembly from type material
GCF_000758685.1	PRJNA224116	SAMN02996608		representative genome	169760	169760	Paenibacillus stellifer	strain=DSM 14472		latest	Complete Genome	Major	Full	2014-09-22	ASM75868v1	Cornell University	GCA_000758685.1	identical	ftp://ftp.ncbi.nlm.nih.gov/genomes/all/GCF/000/758/685/GCF_000758685.1_ASM75868v1		assembly from type material
GCF_000758725.1	PRJNA224116	SAMN03025771		representative genome	189426	189426	Paenibacillus odorifer	strain=DSM 15391		latest	Complete Genome	Major	Full	2014-09-22	ASM75872v1	Cornell University	GCA_000758725.1	identical	ftp://ftp.ncbi.nlm.nih.gov/genomes/all/GCF/000/758/725/GCF_000758725.1_ASM75872v1		assembly from type material
GCF_000759475.1	PRJNA224116	SAMN03031199		representative genome	1076550	1076550	Pantoea rwandensis	strain=ND04		latest	Complete Genome	Major	Full	2014-09-29	ASM75947v1	UNIVERSITY OF MALAYA	GCA_000759475.1	identical	ftp://ftp.ncbi.nlm.nih.gov/genomes/all/GCF/000/759/475/GCF_000759475.1_ASM75947v1
GCF_000761155.1	PRJNA224116	SAMN03077633		representative genome	216142	216142	Pseudomonas rhizosphaerae	strain=DSM 16299		latest	Complete Genome	Major	Full	2014-10-01	ASM76115v1	Kyungpook National University	GCA_000761155.1	identical	ftp://ftp.ncbi.nlm.nih.gov/genomes/all/GCF/000/761/155/GCF_000761155.1_ASM76115v1		assembly from type material
GCF_000761215.1	PRJNA224116	SAMN03031338		representative genome	1907	1907	Streptomyces glaucescens	strain=GLA.O		latest	Complete Genome	Major	Full	2014-10-01	ASM76121v1	Bielefeld University	GCA_000761215.1	identical	ftp://ftp.ncbi.nlm.nih.gov/genomes/all/GCF/000/761/215/GCF_000761215.1_ASM76121v1
GCF_000762265.1	PRJNA224116	SAMN03085433		representative genome	2162	2162	Methanobacterium formicicum	strain=BRM9		latest	Complete Genome	Major	Full	2014-10-02	ASM76226v1	PGgRc	GCA_000762265.1	identical	ftp://ftp.ncbi.nlm.nih.gov/genomes/all/GCF/000/762/265/GCF_000762265.1_ASM76226v1
GCF_000763535.1	PRJNA224116	SAMN03010512		representative genome	190893	190893	Vibrio coralliilyticus	strain=OCN014		latest	Complete Genome	Major	Full	2014-10-28	ASM76353v2	University of Hawaii at Manoa	GCA_000763535.2	identical	ftp://ftp.ncbi.nlm.nih.gov/genomes/all/GCF/000/763/535/GCF_000763535.1_ASM76353v2
GCF_000763575.1	PRJNA224116	SAMN02947172		representative genome	2325	2325	Thermoanaerobacter kivui	strain=DSM 2030; LKT-1		latest	Complete Genome	Major	Full	2014-10-06	ASM76357v1	Georg-August-University Goettingen, Genomic and Applied Microbiology, Goettingen Genomics Laboratory	GCA_000763575.1	identical	ftp://ftp.ncbi.nlm.nih.gov/genomes/all/GCF/000/763/575/GCF_000763575.1_ASM76357v1		assembly from type material
GCF_000764535.1	PRJNA224116	SAMN03078686		representative genome	1549858	1549858	Sphingomonas taxi	strain=ATCC 55669		latest	Complete Genome	Major	Full	2014-10-08	ASM76453v1	Wuhan University	GCA_000764535.1	identical	ftp://ftp.ncbi.nlm.nih.gov/genomes/all/GCF/000/764/535/GCF_000764535.1_ASM76453v1		assembly from type material
GCF_000767055.1	PRJNA224116	SAMN02356458		representative genome	558173	1121358	Corynebacterium doosanense CAU 212 = DSM 45436	strain=CAU 212		latest	Complete Genome	Major	Full	2014-10-16	ASM76705v1	Bielefeld University	GCA_000767055.1	identical	ftp://ftp.ncbi.nlm.nih.gov/genomes/all/GCF/000/767/055/GCF_000767055.1_ASM76705v1		assembly from type material
GCF_000767465.1	PRJNA224116	SAMN03002180		representative genome	1088721	205844	Novosphingobium pentaromativorans US6-1	strain=US6-1		latest	Complete Genome	Major	Full	2014-10-20	ASM76746v1	KIOST	GCA_000767465.1	identical	ftp://ftp.ncbi.nlm.nih.gov/genomes/all/GCF/000/767/465/GCF_000767465.1_ASM76746v1		assembly from type material
GCF_000767615.3	PRJNA224116	SAMN03078809		representative genome	93220	93220	Pandoraea pnomenusa	strain=DSM 16536		latest	Complete Genome	Major	Full	2016-08-18	ASM76761v3	University of Malaya	GCA_000767615.3	identical	ftp://ftp.ncbi.nlm.nih.gov/genomes/all/GCF/000/767/615/GCF_000767615.3_ASM76761v3		assembly from type material
GCF_000769655.1	PRJNA224116	SAMN02838508		representative genome	1505907	1505907	Thermococcus eurythermalis	strain=A501		latest	Complete Genome	Major	Full	2014-10-28	ASM76965v1	Laboratory of Marine Oceanography	GCA_000769655.1	identical	ftp://ftp.ncbi.nlm.nih.gov/genomes/all/GCF/000/769/655/GCF_000769655.1_ASM76965v1		assembly from type material
GCF_000772105.1	PRJNA224116	SAMN02940924		representative genome	1051646	29498	Vibrio tubiashii ATCC 19109	strain=ATCC 19109		latest	Complete Genome	Major	Full	2014-11-05	ASM77210v1	USDA-Agricultural Research Service-Eastern Regional Research Center	GCA_000772105.1	identical	ftp://ftp.ncbi.nlm.nih.gov/genomes/all/GCF/000/772/105/GCF_000772105.1_ASM77210v1		assembly from type material
GCF_000785105.2	PRJNA224116	SAMN03175170		representative genome	1138822	1138822	Lactobacillus curieae	strain=CCTCC M 2011381		latest	Complete Genome	Major	Full	2017-03-03	ASM78510v2	East China University of Science and Technology	GCA_000785105.2	identical	ftp://ftp.ncbi.nlm.nih.gov/genomes/all/GCF/000/785/105/GCF_000785105.2_ASM78510v2		assembly from type material
GCF_000785495.1	PRJNA224116	SAMN03009415		representative genome	2045	2045	Pimelobacter simplex	strain=VKM Ac-2033D		latest	Complete Genome	Major	Full	2014-11-19	ASM78549v1	G.K.Skryabin Institute of Biochemistry and Physiology of Microorganisms Russian Academy of Sciences	GCA_000785495.1	identical	ftp://ftp.ncbi.nlm.nih.gov/genomes/all/GCF/000/785/495/GCF_000785495.1_ASM78549v1
GCF_000785515.1	PRJNA224116	SAMN03174835		representative genome	1304	1304	Streptococcus salivarius	strain=NCTC 8618		latest	Complete Genome	Major	Full	2014-11-19	ASM78551v1	University of Otago	GCA_000785515.1	identical	ftp://ftp.ncbi.nlm.nih.gov/genomes/all/GCF/000/785/515/GCF_000785515.1_ASM78551v1		assembly from type material
GCF_000785705.2	PRJNA224116	SAMN02997349		representative genome	1538553	1538553	Methylomonas denitrificans	strain=FJG1		latest	Complete Genome	Major	Full	2016-02-22	ASM78570v2	University of Alberta	GCA_000785705.2	identical	ftp://ftp.ncbi.nlm.nih.gov/genomes/all/GCF/000/785/705/GCF_000785705.2_ASM78570v2		assembly from type material
GCF_000789255.1	PRJNA224116	SAMN03070125		representative genome	565033	565033	Geoglobus acetivorans	strain=SBH6		latest	Complete Genome	Major	Full	2014-12-04	ASM78925v1	Centre Bioengineering RAS	GCA_000789255.1	identical	ftp://ftp.ncbi.nlm.nih.gov/genomes/all/GCF/000/789/255/GCF_000789255.1_ASM78925v1		assembly from type material
GCF_000789395.1	PRJNA224116	SAMN03222823		representative genome	1415775	1561	Clostridium baratii str. Sullivan	strain=Sullivan		latest	Complete Genome	Major	Full	2014-12-04	ASM78939v1	Los Alamos National Laboratory	GCA_000789395.1	identical	ftp://ftp.ncbi.nlm.nih.gov/genomes/all/GCF/000/789/395/GCF_000789395.1_ASM78939v1
GCF_000800295.1	PRJNA224116	SAMN03135876		representative genome	33033	33033	Parvimonas micra	strain=KCOM 1535; ChDC B708		latest	Complete Genome	Major	Full	2014-12-09	ASM80029v1	Chosun University	GCA_000800295.1	identical	ftp://ftp.ncbi.nlm.nih.gov/genomes/all/GCF/000/800/295/GCF_000800295.1_ASM80029v1
GCF_000800395.1	PRJNA224116	SAMN03218061		representative genome	1182571	1182571	Deinococcus swuensis	strain=DY59		latest	Complete Genome	Major	Full	2014-12-09	ASM80039v1	Kyungpook National University	GCA_000800395.1	identical	ftp://ftp.ncbi.nlm.nih.gov/genomes/all/GCF/000/800/395/GCF_000800395.1_ASM80039v1		assembly from type material
GCF_000800475.2	PRJNA224116	SAMN03253091		representative genome	1447715	1694	Bifidobacterium pseudolongum PV8-2	strain=PV8-2		latest	Complete Genome	Minor	Full	2014-12-09	ASM80047v2	ETH Zurich	GCA_000800475.2	identical	ftp://ftp.ncbi.nlm.nih.gov/genomes/all/GCF/000/800/475/GCF_000800475.2_ASM80047v2
GCF_000801275.2	PRJNA224116	SAMEA4532329		representative genome	28173	28173	Vibrio nigripulchritudo	strain=SFn1		latest	Complete Genome	Major	Full	2013-10-01	ASM80127v1	Genoscope CEA	GCA_000801275.1	identical	ftp://ftp.ncbi.nlm.nih.gov/genomes/all/GCF/000/801/275/GCF_000801275.2_ASM80127v1
GCF_000801295.1	PRJNA224116	SAMD00061055		representative genome	1248727	1248727	endosymbiont of unidentified scaly snail isolate Monju		Monju	latest	Complete Genome	Major	Full	2013-08-14	ASM80129v1	Japan Agency for Marine-Earth Science and Technology	GCA_000801295.1	identical	ftp://ftp.ncbi.nlm.nih.gov/genomes/all/GCF/000/801/295/GCF_000801295.1_ASM80129v1
GCF_000802245.2	PRJNA224116	SAMN03070117		representative genome	1355015	1355015	Streptomyces pluripotens	strain=MUSC 135		latest	Complete Genome	Major	Full	2017-05-09	ASM80224v2	University of Malaya	GCA_000802245.2	identical	ftp://ftp.ncbi.nlm.nih.gov/genomes/all/GCF/000/802/245/GCF_000802245.2_ASM80224v2		assembly from type material
GCF_000803645.1	PRJNA224116	SAMN02872841		representative genome	1515612	1515612	Sphingopyxis fribergensis	strain=Kp5.2		latest	Complete Genome	Major	Full	2014-12-18	ASM80364v1	Bielefeld University	GCA_000803645.1	identical	ftp://ftp.ncbi.nlm.nih.gov/genomes/all/GCF/000/803/645/GCF_000803645.1_ASM80364v1		assembly from type material
GCF_000807255.1	PRJNA224116	SAMN02990135		representative genome	1262449	1501	Clostridium pasteurianum DSM 525 = ATCC 6013	strain=DSM 525		latest	Complete Genome	Major	Full	2014-12-23	ASM80725v1	Georg-August-University Goettingen, Genomic and Applied Microbiology, Goettingen Genomics Laboratory	GCA_000807255.1	identical	ftp://ftp.ncbi.nlm.nih.gov/genomes/all/GCF/000/807/255/GCF_000807255.1_ASM80725v1		assembly from type material
GCF_000807275.1	PRJNA224116	SAMN02900470		representative genome	1267021	1267021	Frischella perrara	strain=PEB0191		latest	Complete Genome	Major	Full	2014-12-23	ASM80727v1	University of Lausanne	GCA_000807275.1	identical	ftp://ftp.ncbi.nlm.nih.gov/genomes/all/GCF/000/807/275/GCF_000807275.1_ASM80727v1		assembly from type material
GCF_000807675.2	PRJNA224116	SAMN03265381		representative genome	1736	1736	Eubacterium limosum	strain=ATCC 8486		latest	Complete Genome	Major	Full	2017-04-03	ASM80767v2	Korean Advanced Institute of Science and Technology	GCA_000807675.2	identical	ftp://ftp.ncbi.nlm.nih.gov/genomes/all/GCF/000/807/675/GCF_000807675.2_ASM80767v2		assembly from type material
GCF_000812665.2	PRJNA224116	SAMN03252591		representative genome	1579316	1579316	Halocynthiibacter arcticus	strain=PAMC 20958		latest	Complete Genome	Major	Full	2016-02-25	ASM81266v2	Korea Polar Research Institute	GCA_000812665.2	identical	ftp://ftp.ncbi.nlm.nih.gov/genomes/all/GCF/000/812/665/GCF_000812665.2_ASM81266v2		assembly from type material
GCF_000815025.1	PRJNA224116	SAMN03273000		representative genome	325775	325775	Coxiella endosymbiont of Amblyomma americanum		C904	latest	Complete Genome	Major	Full	2015-01-06	ASM81502v1	Portland State University	GCA_000815025.1	identical	ftp://ftp.ncbi.nlm.nih.gov/genomes/all/GCF/000/815/025/GCF_000815025.1_ASM81502v1
GCF_000815065.1	PRJNA224116	SAMN02730214		representative genome	743971	2128	Mycoplasma flocculare ATCC 27399	strain=Ms42		latest	Complete Genome	Major	Full	2015-01-06	ASM81506v1	University of Missouri	GCA_000815065.1	identical	ftp://ftp.ncbi.nlm.nih.gov/genomes/all/GCF/000/815/065/GCF_000815065.1_ASM81506v1		assembly from type material
GCF_000815185.1	PRJNA224116	SAMN03273272		representative genome	56458	56458	Xanthomonas sacchari	strain=R1		latest	Complete Genome	Major	Full	2015-01-06	ASM81518v1	China National Rice Research Institute	GCA_000815185.1	identical	ftp://ftp.ncbi.nlm.nih.gov/genomes/all/GCF/000/815/185/GCF_000815185.1_ASM81518v1
GCF_000815225.1	PRJNA224116	SAMN03273550		representative genome	594679	594679	Allofrancisella guangzhouensis	strain=08HL01032		latest	Complete Genome	Major	Full	2015-01-06	ASM81522v1	Swedish Defense Research Agancy	GCA_000815225.1	identical	ftp://ftp.ncbi.nlm.nih.gov/genomes/all/GCF/000/815/225/GCF_000815225.1_ASM81522v1		assembly from type material
GCF_000816085.1	PRJNA224116	SAMN02863110		representative genome	1284	1284	Staphylococcus hyicus	strain=ATCC 11249		latest	Complete Genome	Major	Full	2015-01-07	ASM81608v1	University of Missouri - Columbia	GCA_000816085.1	identical	ftp://ftp.ncbi.nlm.nih.gov/genomes/all/GCF/000/816/085/GCF_000816085.1_ASM81608v1		assembly from type material
GCF_000816105.1	PRJNA224116	SAMN02429659		representative genome	1432656	110164	Thermococcus guaymasensis DSM 11113	strain=DSM 11113		latest	Complete Genome	Major	Full	2015-01-07	ASM81610v1	University of Waterloo	GCA_000816105.1	identical	ftp://ftp.ncbi.nlm.nih.gov/genomes/all/GCF/000/816/105/GCF_000816105.1_ASM81610v1		assembly from type material
GCF_000816145.1	PRJNA224116	SAMN02584724		representative genome	1123384	57487	Pseudothermotoga hypogea DSM 11164 = NBRC 106472	strain=DSM 11164 = NBRC 106472		latest	Complete Genome	Major	Full	2015-01-07	ASM81614v1	University of Waterloo	GCA_000816145.1	identical	ftp://ftp.ncbi.nlm.nih.gov/genomes/all/GCF/000/816/145/GCF_000816145.1_ASM81614v1		assembly from type material
GCF_000816185.1	PRJNA224116	SAMN03248541		representative genome	1031564	260714	Campylobacter insulaenigrae NCTC 12927	strain=NCTC 12927		latest	Complete Genome	Major	Full	2015-01-07	ASM81618v1	USDA, ARS, WRRC	GCA_000816185.1	identical	ftp://ftp.ncbi.nlm.nih.gov/genomes/all/GCF/000/816/185/GCF_000816185.1_ASM81618v1		assembly from type material
GCF_000816345.1	PRJNA224116	SAMN03248550		representative genome	580033	1031542	Campylobacter volucris LMG 24379	strain=LMG 24379		latest	Complete Genome	Major	Full	2015-01-07	ASM81634v1	USDA, ARS, WRRC	GCA_000816345.1	identical	ftp://ftp.ncbi.nlm.nih.gov/genomes/all/GCF/000/816/345/GCF_000816345.1_ASM81634v1		assembly from proxytype material
GCF_000817955.1	PRJNA224116	SAMN03096815		representative genome	345632	345632	Geobacter pickeringii	strain=G13		latest	Complete Genome	Major	Full	2015-01-14	ASM81795v1	University of Minnesota	GCA_000817955.1	identical	ftp://ftp.ncbi.nlm.nih.gov/genomes/all/GCF/000/817/955/GCF_000817955.1_ASM81795v1		assembly from type material
GCF_000817975.1	PRJNA224116	SAMN03278357		representative genome	1328314	353	Azotobacter chroococcum NCIMB 8003	strain=NCIMB 8003		latest	Complete Genome	Major	Full	2015-01-14	ASM81797v1	University of Reading	GCA_000817975.1	identical	ftp://ftp.ncbi.nlm.nih.gov/genomes/all/GCF/000/817/975/GCF_000817975.1_ASM81797v1
GCF_000818015.1	PRJNA224116	SAMN02673660		representative genome	1123016	74829	Pseudomonas balearica DSM 6083	strain=DSM6083 (=SP1402)		latest	Complete Genome	Major	Full	2015-01-14	ASM81801v1	MICROGEN. Microbial Comparative Genomics	GCA_000818015.1	identical	ftp://ftp.ncbi.nlm.nih.gov/genomes/all/GCF/000/818/015/GCF_000818015.1_ASM81801v1		assembly from type material
GCF_000818035.1	PRJNA224116	SAMN02797820		representative genome	546263	495	Neisseria elongata subsp. glycolytica ATCC 29315	strain=ATCC 29315		latest	Complete Genome	Major	Full	2015-01-14	ASM81803v1	INRS-Institut Armand Frappier	GCA_000818035.1	identical	ftp://ftp.ncbi.nlm.nih.gov/genomes/all/GCF/000/818/035/GCF_000818035.1_ASM81803v1		assembly from type material
GCF_000818095.1	PRJNA224116	SAMN02870886		representative genome	1508404	1508404	Jeotgalibacillus malaysiensis	strain=D5		latest	Complete Genome	Major	Full	2015-01-14	ASM81809v1	Universiti Teknologi Malaysia	GCA_000818095.1	identical	ftp://ftp.ncbi.nlm.nih.gov/genomes/all/GCF/000/818/095/GCF_000818095.1_ASM81809v1		assembly from type material
GCF_000819445.1	PRJNA224116	SAMN03283197		representative genome	1223515	1223514	Corynebacterium humireducens NBRC 106098 = DSM 45392	strain=DSM 45392		latest	Complete Genome	Major	Full	2015-01-16	ASM81944v1	CeBiTec, Bielefeld University	GCA_000819445.1	identical	ftp://ftp.ncbi.nlm.nih.gov/genomes/all/GCF/000/819/445/GCF_000819445.1_ASM81944v1		assembly from type material
GCF_000819565.1	PRJNA224116	SAMN03280159		representative genome	1208324	1208324	Celeribacter indicus	strain=P73		latest	Complete Genome	Major	Full	2015-01-16	ASM81956v1	The Third Institute of State Oceanic Administration (SOA)	GCA_000819565.1	identical	ftp://ftp.ncbi.nlm.nih.gov/genomes/all/GCF/000/819/565/GCF_000819565.1_ASM81956v1		assembly from type material
GCF_000827005.1	PRJNA224116	SAMN03283748		representative genome	1888	1888	Streptomyces albus	strain=DSM 41398		latest	Complete Genome	Major	Full	2015-01-21	ASM82700v1	Shanghai Jiao Tong University	GCA_000827005.1	identical	ftp://ftp.ncbi.nlm.nih.gov/genomes/all/GCF/000/827/005/GCF_000827005.1_ASM82700v1
GCF_000827125.1	PRJNA224116	SAMN03096814		representative genome	483547	483547	Geoalkalibacter subterraneus	strain=Red1		latest	Complete Genome	Major	Full	2015-01-21	ASM82712v1	University of Minnesota	GCA_000827125.1	identical	ftp://ftp.ncbi.nlm.nih.gov/genomes/all/GCF/000/827/125/GCF_000827125.1_ASM82712v1		assembly from type material
GCF_000828475.1	PRJNA224116	SAMD00019677		representative genome	1384459	1384459	Methyloceanibacter caenitepidi	strain=Gela4		latest	Complete Genome	Major	Full	2015-01-06	ASM82847v1	National Institute of Advanced Industrial Science and Technology, Japan	GCA_000828475.1	identical	ftp://ftp.ncbi.nlm.nih.gov/genomes/all/GCF/000/828/475/GCF_000828475.1_ASM82847v1		assembly from type material
GCF_000828615.1	PRJNA224116	SAMD00060997		representative genome	1076588	1076588	Thiolapillus brandeum	strain=Hiromi 1		latest	Complete Genome	Major	Full	2014-01-16	ASM82861v1	Japan Agency for Marine-Earth Science and Technology	GCA_000828615.1	identical	ftp://ftp.ncbi.nlm.nih.gov/genomes/all/GCF/000/828/615/GCF_000828615.1_ASM82861v1		assembly from type material
GCF_000828635.1	PRJNA224116	SAMD00061036		representative genome	1223802	748811	Sulfuritalea hydrogenivorans sk43H	strain=DSM 22779		latest	Complete Genome	Major	Full	2014-01-07	ASM82863v1	Institute of Low Temperature Science, Hokkaido University	GCA_000828635.1	identical	ftp://ftp.ncbi.nlm.nih.gov/genomes/all/GCF/000/828/635/GCF_000828635.1_ASM82863v1		assembly from type material
[truncated: 570 more rows]
